# Supplementary material for: Identification of the Genetic Variation and Gene Exchange between Citrus Trifoliata and Citrus Clementina
Source: MDPI journal article supplement (doi:10.3390/biom8040182), 2018-12-19
Supplement: s1 [file s1]

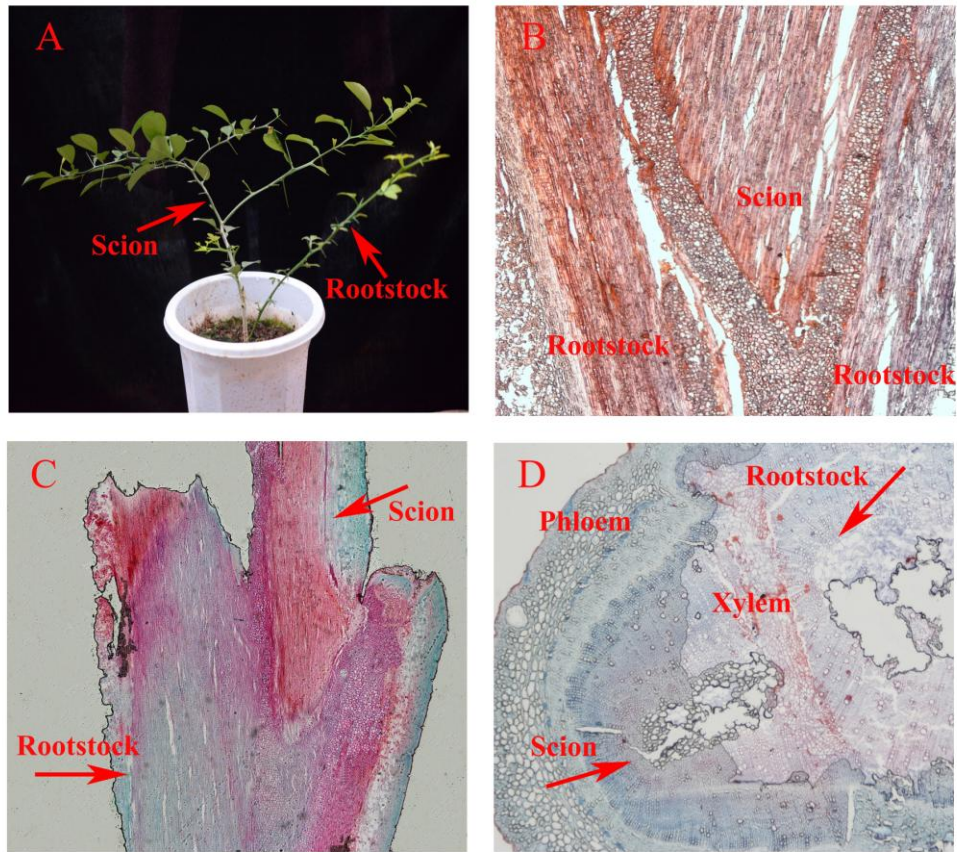

**Figure S1.** Morphological and cytological analysis of grafted plants. (A). The grafted plants after four months; (B) The middle xylem slitting of grafted plants; (C). Longitudinal diagram of graft union; (D). Crosscutting structure of graft union.

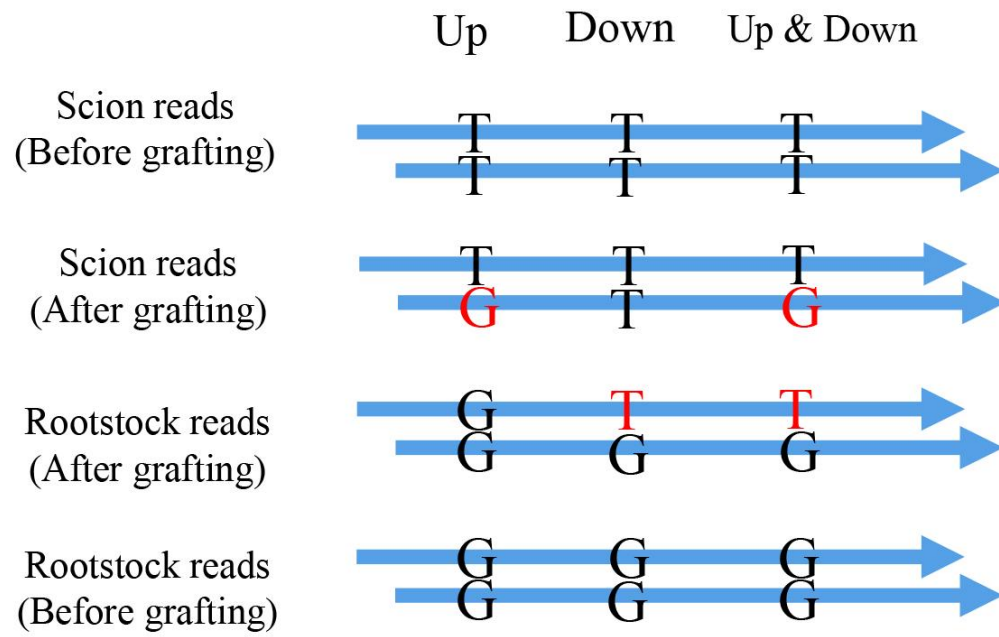

**Figure S2.** Detection of mobile genes. Illustrated are examples for the scions and rootstocks of gene movement detected in this study.

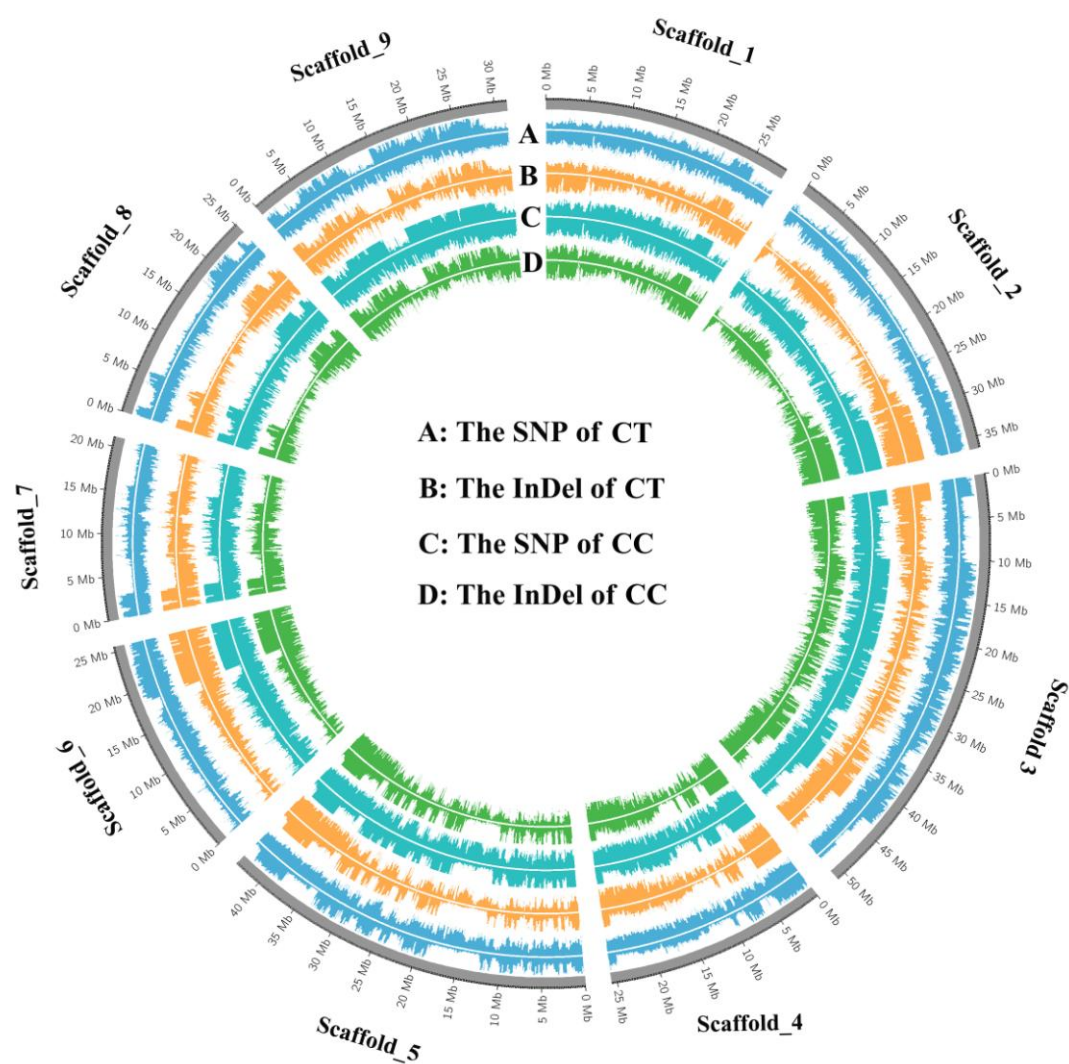

**Figure S3.** Landscape of the genetic variation of *C. clementina* and *C. trifoliata*.

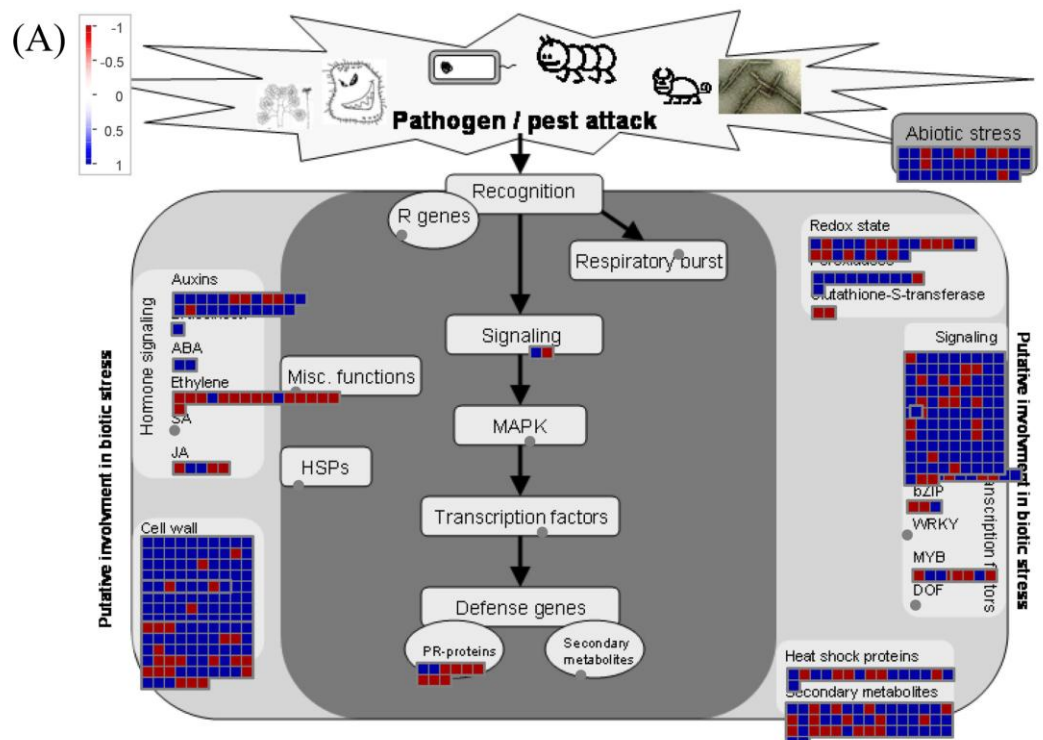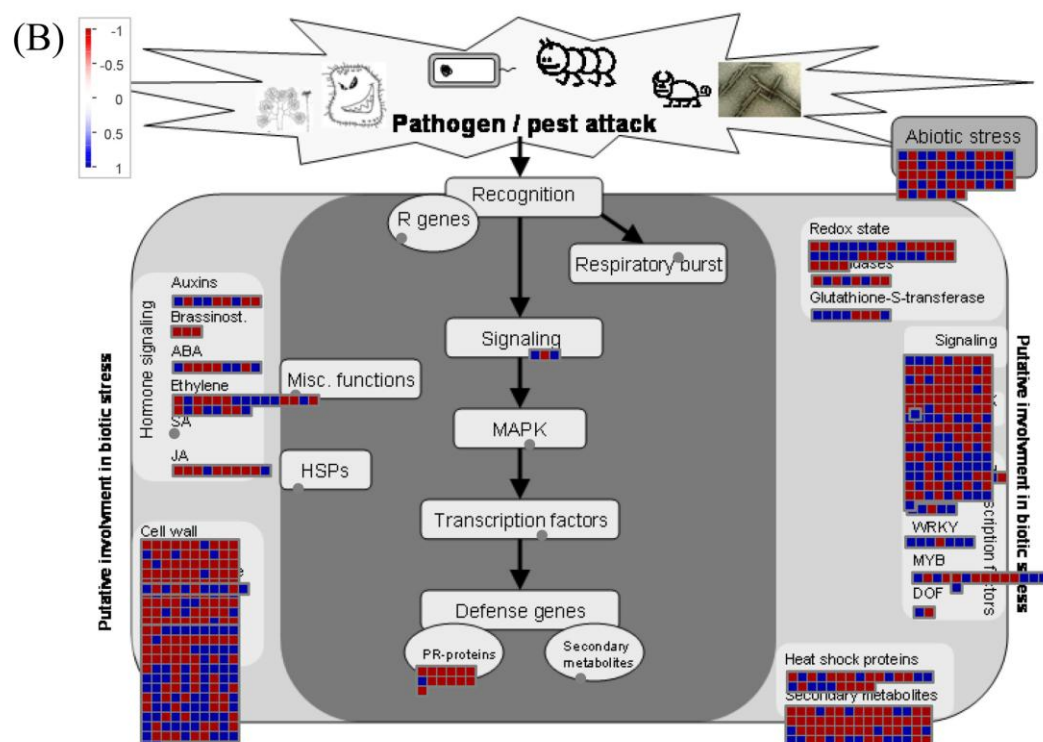

**Figure S4.** MapMan software output to provide an overview of the effect of scions (A) and rootstocks (B) induced on biotic stress responses. Up-regulated and down-regulated transcripts are shown in red and blue, respectively.
