# Supplementary material for: Identification of the Genetic Variation and Gene Exchange between Citrus Trifoliata and Citrus Clementina
Source: Biomolecules. 2018 Dec 19;8(4):182. doi: 10.3390/biom8040182 (PMC6315893; doi:10.3390/biom8040182)
Supplement: Supplementary file 1 [file biomolecules-08-00182-s001.zip › Supplementary Table S1-S9.xlsx]

## Sheet: Table S1
Table S1. Primers used in this study.
The primers from for Real-time PCR
Gene ID	Primer pairs	Sequence (5'-3')
Ciclev10022211m	DEG-22211-F	GCTGCAACGAACCAACAGTA
	DEG-22211-R	GCAAACGGAAGGACAGTGAA
Ciclev10028964m	DEG-28964-F	GTTCTGGATGACTGCACAGC
	DEG-28964-R	GCTGAATCCCAAACTTGCCA
Ciclev10020212m	DEG-12042-F	CAAAGGAACGAGCCGCTTTA
	DEG-12042-R	AGCAACTTGAACCCCACAAC
Ciclev10029695m	DEG-29695-F	AGTCACTTGAAAGGAAAGCAGA
	DEG-29695-R	AGTCCTCACAGCATATCCCG
Ciclev10024962m	DEG-24962-F	TGGTGGAGGGTTCTTGTTGT
	DEG-24962-R	TGACTCCATTCCACGAGCAT
Ciclev10021652m	DEG-21652-F	TAAGAATGGGGCTCGGGTTT
	DEG-21652-R	GCCACCTTTCTCCTCCTCTT
Ciclev10010157m	DEG-10157-F	CGGAGTCTTTGATGGGCATG
	DEG-10157-R	TGGTTCCACTGCAAAAGCAA
Ciclev10017825m	DEG-17825-F	CAGACACTGGCATTGCTGTT
	DEG-17825-R	AAGACCTGCCTTCTCCCATC
Ciclev10006042m	DEG-06042-F	TGGAACCACTGACGCTTCTT
	DEG-06042-R	GGGCATTGAAGTAAACGGCA
Ciclev10022906m	DEG-22906-F	ACACTTGTTGCCTCTTCTGC
	DEG-22906-R	CAAAGTGAACGTGGATGCCA
Ciclev10029285m	DEG-29285-F	ACCACCTCTACCACCACAAC
	DEG-29285-R	TCACATCACAACACACGCAG
Ciclev10012905m	DEG-12905-F	TCTTATTCTTGGCCGCGTTG
	DEG-12905-R	CTCGGTGCATCAGGATCAAC
Ciclev10010422m	DEG-10422-F	ACGGGTTTCAGCGGTTAATG
	DEG-10422-R	CCTTCCATCAAGCCAGGACT
Ciclev10007219m	DEG-07219-F	GCTGGTTGTGGAGTTCAAGG
	DEG-07219-R	TCTCAGGCACAGCATCTTCA
Ciclev10014530m	DEG-14530-F	GCCAAGATTGCCCGAAGATT
	DEG-14530-R	ATGAATACTCGTTGCACCGC
Ciclev10026139m	DEG-26139-F	TCAAGATTCCCCACCACTCC
	DEG-26139-R	AGAGGAGAGCAAGGTTGAGG
Ciclev10025542m	DEG-25542-F	TGGGAATTCGTTCGTGAGGA
	DEG-25542-R	GCCCCTCAATTTCAGCAACA
Ciclev10029240m	DEG-29240-F	GAAGTGTGAGGAGGAACAGC
	DEG-29240-R	CGCTGATGGTGCAATCTCAA
Ciclev10033238m	DEG-33238-F	GAATTTGCACTGCGACGAGT
	DEG-33238-R	TTGATCTTCATCCCAAGCGC
Ciclev10015965m	DEG-15965-F	TGGCTGAAATCCCCGATCTT
	DEG-15965-R	GGCCCTAAGTCCCTTGATCA
Ciclev10017226m	DEG-17226-F	GATTGCCGGAACCCTAATGT
	DEG-17226-R	CAAGGGACGTTAGCAGCTTT
The primers for SNP or InDel
Gene ID	Primer pairs	Sequence(5'-3')
Ciclev10012232m	DEG-12232-F	GCTCCTTGGGGTCTCAATCT
	DEG-12232-R	AGCTTTTGTCCATCCCCTGA
Ciclev10011143m	DEG-11143-F	GGGGAGGTTCTGGCACTTAT
	DEG-11143-R	GTCAGCGTTTCTTTCACCGT
Ciclev10009700m	DEG-09700-F	GGGAGAATAATGACGACGGC
	DEG-09700-R	TATTGGGAGGAATCAGCGCA
Ciclev10029285m	DEG-29285-F	ACCACCTCTACCACCACAAC
	DEG-29285-R	TCACATCACAACACACGCAG
Ciclev10012905m	DEG-12905-F	TCTTATTCTTGGCCGCGTTG
	DEG-12905-R	CTCGGTGCATCAGGATCAAC
Ciclev10007219m	DEG-07219-F	GCTGGTTGTGGAGTTCAAGG
	DEG-07219-R	TCTCAGGCACAGCATCTTCA
Ciclev10025542m	DEG-25542-F	TGGGAATTCGTTCGTGAGGA
	DEG-25542-R	GCCCCTCAATTTCAGCAACA
Ciclev10021877m	DEG-21877-F	AGATGGAAGTCGAAGCAGCT
	DEG-21877-R	TCAACTTGACCGCAACACTG
Ciclev10025910m	DEG-25910-F	CGGTGATGATGGCGGTATTC
	DEG-25910-R	CCGATCCAGCAAGCAATCTC
Ciclev10015965m	DEG-15965-F	TGGCTGAAATCCCCGATCTT
	DEG-15965-R	GGCCCTAAGTCCCTTGATCA
Ciclev10031811m	DEG-31811-F	CGAAAGAGTGTCGCTTGCTT
	DEG-31811-R	TCCTTTGGGTCCTCTCGTTC
Ciclev10000756m	00756-F	TTGATCCCGATACTACTCC
	00756-R	CAGGTTACTACTTTCCTTCTC
Ciclev10003235m	03235-F	GGGATGATTTAGAGGAAC
	03235-R	CCTTCTGATTAGCCTGAC
Ciclev10004790m	04790-F	AGGGATCTTGTTGAAAGT
	04790-R	CCATGCCACAATGAAGTA
Ciclev10012594m	12594-F	GGCAAGTAACTTTCTCCAAG
	12594-R	AGGTACAACTGTGCTCCTCA
Ciclev10000115m	00115-F	CAGTTGGAGATGGCGAAGGC
	00115-R	TTGCGAGAAAGGTCATTGAGGTAA
Ciclev10008515m	08515-F	ATGAAACGAAGCCCCTCAGA
	08515-R	TCCTTTCAGTCGCTCAACCT
Ciclev10025281m	25281-F	TCTCTGAAGGATGAGTGGCT
	25281-R	CGCATTCTCACCCTCGTAAC
Ciclev10027954m	27954-F	GTTTTCTGCGCTGCCATACT
	27954-R	TGTCTTCTTGTGGAGGTGTAGT
The primers for moble genes
Gene ID	Primer pairs	Sequence(5'-3')
Ciclev10004518m	GD3F	ATTTAGCAGCCGCCAGAG
	GD3R	CAAATGCTCGGAAACCTG
Ciclev10000229m	GD8F	TATATTTGAAGTTGAAGAAGAACGG
	GD8R	AACGACTTCCCTCCACCTCT
Ciclev10011555m	GU25F	TTCAACGGACTTGCTATTCA
	GU25R	TCCTTTAACCCTTTCCTCAA
Ciclev10013722m	GU26F	GTTGTGATTGGAGCGGTGTA
	GU26R	AAGGGTGTCTAGTGCAGAGG
Ciclev10005694m	GD19F	AAAACCAATCTGCCCTCTGC
	GD19R	TCATTCTTGCTCGGCGTTGG
Ciclev10007520m	GU22F	GTGCTTTCGCTGAAGTTGAT
	GU22R	GAAGCATTGTAAACCGGAGC
Ciclev10025166m	GU27F	GAAACCCAACAAATACACGC
	GU27R	TTTCCTTTCCATGCTCTCAA
Ciclev10003865m	GD1F	GAGCATTGAGCGCAGAGT
	GD1R	TCACCCGCCATCGTCTTA
Ciclev10027193m	GU26F	CCATTGCGAGTAAAGGTCAC
	GU26R	AAATGGTTATTCAACTCCGC
Ciclev10024314m	GU34F	TGATCTCACTCGCAACTACC
	GU34R	GATCCAAGACTCTCAAGCCT
Ciclev10016835m	GU38F	GGAAGGCTGATGGCTCTT
	GU38R	TCCAACAGTATCCCTCGGAA
Ciclev10000345m	GB3F	GTTTTGATTCCAGTGGCAGT
	GB3R	GTGGGTGACTTCGGACTA

## Sheet: Table S2
Table S2. Number and densities of SNPs and InDels in C. trifoliata and C. clementina genome
		Genome region				Genic region
The type of variation	Chromosome ID	SNPs		InDels		SNPs		InDels
		Number	Density (SNP/100KB)	Number	Density (InDel/100KB)	Number	Density (SNP/100KB)	Number	Density (InDel/100KB)
C. clementina genetic variation	Chromosome 1	274483	948.435	22769	78.6748	45828	158.352	4744	16.3922
	Chromosome 2	285722	785.466	27098	74.4939	71402	196.288	7374	20.2715
	Chromosome 3	653335	1279.79	52347	102.54	128649	252.004	11913	23.3358
	Chromosome 4	252194	983.231	22911	89.3233	58270	227.178	5705	22.2421
	Chromosome 5	515424	1190.34	40584	93.7264	86069	198.771	8155	18.8335
	Chromosome 6	230573	900.192	22478	87.7575	53001	206.924	5587	21.8125
	Chromosome 7	147176	696.409	13519	63.9693	35921	169.971	3280	15.5203
	Chromosome 8	205443	818.097	17312	68.9384	45066	179.458	4325	17.2226
	Chromosome 9	432584	1377.18	31825	101.318	72230	229.952	6370	20.2796
	Others	65864	514.579	1836	14.3366	1916	14.9694	81	0.632842
C. trifoliata genetic variation	Chromosome 1	789551	2728.17	78019	269.583	162763	562.403	18527	64.0172
	Chromosome 2	977125	2686.17	95180	261.655	207315	569.921	22658	62.2881
	Chromosome 3	1362505	2668.95	134203	262.884	298416	584.553	32198	63.0712
	Chromosome 4	683150	2663.4	72086	281.042	157321	613.349	17529	68.3404
	Chromosome 5	1099382	2538.96	98206	226.801	188331	434.94	20105	46.4313
	Chromosome 6	698192	2725.85	70082	273.611	132599	517.686	15091	58.9175
	Chromosome 7	568682	2690.89	61323	290.169	143735	680.127	14563	68.9093
	Chromosome 8	643354	2561.91	60651	241.519	123577	492.098	13365	53.221
	Chromosome 9	862583	2746.13	75032	238.872	154165	490.801	16020	51.0014
	Others	59679	466.256	3115	24.3293	4480	35.0016	242	1.89071
C. clementina specific genetic variation	Chromosome 1	159894	552.49	9669	33.4098	22761	78.6472	1605	5.54583
	Chromosome 2	146939	403.944	9976	27.4246	33543	92.2116	2529	6.95236
	Chromosome 3	367614	720.102	21062	41.2574	65191	127.7	4309	8.4407
	Chromosome 4	135273	527.39	8527	33.2443	28488	111.066	1935	7.544
	Chromosome 5	281289	649.621	15744	36.3599	42734	98.6917	2860	6.60501
	Chromosome 6	126397	493.473	8258	32.2405	26687	104.19	1853	7.23439
	Chromosome 7	75039	355.07	4764	22.5423	16914	80.0338	1075	5.08669
	Chromosome 8	112801	449.186	6388	25.4377	22149	88.1998	1486	5.91742
	Chromosome 9	242677	772.588	13007	41.4092	35843	114.11	2211	7.03896
	Others	57078	445.935	1323	10.3286	1103	8.61759	38	0.296889
C. trifoliata specific genetic variation	Chromosome 1	674962	2332.23	64919	224.318	139696	482.698	15388	53.1709
	Chromosome 2	838342	2304.65	78058	214.586	169456	465.844	17813	48.9689
	Chromosome 3	1076784	2109.26	102918	201.601	234958	460.248	24594	48.176
	Chromosome 4	566229	2207.56	57702	224.963	127539	497.237	13759	53.6423
	Chromosome 5	865247	1998.24	73366	169.435	144996	334.86	14810	34.2028
	Chromosome 6	594016	2319.13	55862	218.094	106285	414.953	11357	44.3394
	Chromosome 7	496545	2349.56	52568	248.742	124728	590.189	12358	58.4757
	Chromosome 8	550712	2193	49727	198.019	100660	400.84	10526	41.9157
	Chromosome 9	672676	2141.54	56214	178.963	117778	374.959	11861	37.7608
	Others	50893	397.612	2602	20.3213	3667	28.6498	199	1.55476

## Sheet: Table S3
Table S3. Summary of genetic variation identified from C. trifoliata and C. clementina.
Location distributed	Genetic variation categories	C. trifoliata	C. clementina	C. trifoliata specific	C. clementina specific
Exon (SNP)	start_lost	631	246	517	132
	start_lost+splice_region_variant	8	11	5	8
	stop_gained	4587	1789	4048	1250
	stop_gained+splice_region_variant	103	45	93	35
	stop_lost	449	196	330	77
	stop_lost+splice_region_variant	314	168	216	70
	stop_retained_variant	415	126	348	59
	synonymous_variant	299860	114373	241901	56414
	initiator_codon_variant	94	40	79	25
UTR (SNP)	3_prime_UTR_variant	244428	85761	199286	40619
	5_prime_UTR_premature_start_codon_gain_variant	21204	7533	17442	3771
	5_prime_UTR_variant	143359	50755	117732	25128
Intergenic (SNP)	downstream_gene_variant	4744142	1811541	3876047	943446
	intergenic_region	6179417	2467287	5122912	1410782
	upstream_gene_variant	5122062	1963735	4186204	1027877
Intron (SNP)	intron_variant	1319075	482253	1068118	231296
	splice_acceptor_variant+intron_variant	1167	464	990	287
	splice_acceptor_variant+splice_region_variant+intron_variant	1	1	1	1
	splice_donor_variant+intron_variant	1088	452	908	272
	splice_donor_variant+splice_region_variant+intron_variant	5	1	5	1
	splice_region_variant	3226	1022	2731	527
	splice_region_variant+intron_variant	39170	14377	31844	7051
	splice_region_variant+stop_retained_variant	158	60	129	31
	splice_region_variant+synonymous_variant	4676	1585	3945	854
Functional classes (SNP)	Missense	347783	138986	280502	71705
	Nonsense	4690	1934	4141	1285
	Silent	305112	116146	246325	57359
Impact (SNP)	High	8353	3373	7113	2133
	Low	368803	139116	298419	68732
	Moderate	346290	138327	279357	71394
	Modifier	17752483	6861332	14570299	3679148
Exon (InDel)	disruptive_inframe_deletion	2369	959	1821	411
	disruptive_inframe_deletion+splice_region_variant	20	5	19	4
	disruptive_inframe_insertion	1604	602	1253	251
	disruptive_inframe_insertion+splice_region_variant	9	9	7	7
	exon_loss_variant+splice_region_variant	1	0	1	0
	frameshift_variant	5728	2551	4390	1213
	frameshift_variant+splice_acceptor_variant+splice_region_variant+intron_variant	26	17	19	10
	frameshift_variant+splice_donor_variant+splice_region_variant+intron_variant	35	10	31	6
	frameshift_variant+splice_region_variant	151	90	87	26
	frameshift_variant+start_lost	279	117	211	49
	frameshift_variant+start_lost+splice_donor_variant+splice_region_variant+intron_variant	1	0	1	0
	frameshift_variant+start_lost+splice_region_variant	4	0	4	0
	frameshift_variant+stop_gained	121	55	98	32
	frameshift_variant+stop_gained+splice_region_variant	5	3	4	2
	frameshift_variant+stop_lost	79	34	63	18
	frameshift_variant+stop_lost+splice_region_variant	37	22	21	6
	inframe_deletion	1123	447	874	198
	inframe_deletion+splice_region_variant	8	8	4	4
	inframe_insertion	1365	582	1052	269
	inframe_insertion+splice_region_variant	9	7	5	3
	intragenic_variant	1	0	1	0
	start_lost+disruptive_inframe_deletion	1	0	1	2
	start_lost+disruptive_inframe_insertion	15	4	13	0
	start_lost+inframe_deletion	17	8	14	5
	start_lost+inframe_insertion	22	6	19	3
	start_lost+inframe_insertion+splice_region_variant	1	1	0	0
	stop_gained+disruptive_inframe_deletion	13	3	12	2
	stop_gained+disruptive_inframe_insertion	14	4	10	0
	stop_gained+inframe_insertion	14	4	11	1
	stop_lost+disruptive_inframe_deletion	5	1	4	0
	stop_lost+disruptive_inframe_insertion+splice_region_variant	1	0	1	0
	stop_lost+inframe_deletion	10	4	10	4
	stop_lost+inframe_deletion+splice_region_variant	3	3	1	1
	stop_lost+inframe_insertion	1	0	1	0
	non_coding_transcript_variant	471	168	350	47
UTR (InDel)	3_prime_UTR_variant	37766	11842	30114	4190
	5_prime_UTR_truncation+exon_loss_variant	3	1	3	1
	5_prime_UTR_variant	26841	9639	20834	3632
Intergenic (InDel)	upstream_gene_variant	667245	212417	529449	74621
	downstream_gene_variant	607944	197185	480606	69847
	intergenic_region	578913	195575	462285	78947
Intron (InDel)	intron_variant	188893	60757	147773	19637
	splice_acceptor_variant+3_prime_UTR_variant+intron_variant	1	1	3	0
	splice_acceptor_variant+5_prime_UTR_variant+intron_variant	3	1	0	1
	splice_acceptor_variant+disruptive_inframe_deletion+splice_region_variant+intron_variant	5	0	5	0
	splice_acceptor_variant+inframe_deletion+splice_region_variant+intron_variant	2	3	0	1
	splice_acceptor_variant+intron_variant	163	87	105	29
	splice_acceptor_variant+splice_donor_variant+intron_variant	1	2	1	1
	splice_acceptor_variant+splice_donor_variant+splice_region_variant+3_prime_UTR_variant+intron_variant	2	1	0	0
	splice_acceptor_variant+splice_donor_variant+splice_region_variant+5_prime_UTR_variant+intron_variant	1	1	0	0
	splice_acceptor_variant+splice_region_variant+3_prime_UTR_variant+intron_variant	3	4	2	3
	splice_acceptor_variant+splice_region_variant+5_prime_UTR_variant+intron_variant	9	3	9	3
	splice_acceptor_variant+splice_region_variant+intron_variant	61	19	49	7
	splice_donor_variant+5_prime_UTR_variant+intron_variant	5	0	5	0
	splice_donor_variant+disruptive_inframe_deletion+splice_region_variant+intron_variant	5	1	4	0
	splice_donor_variant+inframe_deletion+splice_region_variant+intron_variant	8	2	6	0
	splice_donor_variant+intron_variant	245	113	172	40
	splice_donor_variant+splice_region_variant+3_prime_UTR_variant+intron_variant	5	1	4	0
	splice_donor_variant+splice_region_variant+5_prime_UTR_variant+intron_variant	3	42	3	0
	splice_donor_variant+splice_region_variant+intron_variant	101		77	18
	splice_region_variant	761	227	601	67
	splice_region_variant+downstream_gene_variant	30	7	23	0
	splice_region_variant+intron_variant	4941	1719	3819	597
Impact (InDel)	High	7207	3218	5472	1483
	Low	5732	1953	4443	664
	Moderate	6510	2620	5038	1148
	Modifier	2108074	687583	1671412	250921

## Sheet: Table S4
Table S4. Sanger sequencing validated the genetic variation difference between C. clementina and C. trifoliata.
Gene ID	Location	C. clementina	C. trifoliata	difference	homo or heter
Ciclev10011143m	site 1	CCTACTGTTGG	CCTACCGTTGG	Confirmed	homo
	site 2	GAATAAAATGGTTCTA	GAATATAATGTTTCTA	Confirmed	homo
	site 3	GAAATGTTTTA	GAAATATTTTA	Confirmed	homo
Ciclev10009700m	site 1	TGACTGCGATG	TGACTACGATG	Confirmed	homo
	site 2	AGCTTTAACAA	AGCTTCGACAA	Confirmed	homo
	site 3	TACTTCGAATG	TACTTCGAATG	Confirmed	homo
Ciclev10029285m	site 1	GCCACTACCAC	GCCACAACCAC	Confirmed	homo
	site 2	CTAAATAAAGCTTACTCATGCA	CTAAAGAAAGCTTGCTTATGCA	Confirmed	homo
Ciclev10012905m	site 1	CTATTTAAACA;CTATTCAAACA	CTATTCAAACA	Confirmed	heter
Ciclev10025542m	site 1	GGGATAGAATT	GGGATTGAATT	Confirmed	homo
Ciclev10021877m	site 1	ATATG--TCGGT	ATATGTGTCGGT	Confirmed	homo
Ciclev10025910m	site 1	GTTCAATCATC	GTTCAGTCATC	Confirmed	homo
	site 2	TCATCAGTAAC	TCATCGGTAAC	Confirmed	homo
Ciclev10015965m	site 1	GCTTTTGATGA	GCTTT-GATGA	Confirmed	homo
	site 2	AAGGAATTTGCCGTTGAAT	AAGGAGTTTGCCGCTGAAT	Confirmed	homo
	site 3	GTTGCTGAGCA	GTTGCGGAGCA	Confirmed	homo
	site 4	GGTATTTGAAG	GGTATCTGAAG	Confirmed	homo
Ciclev10031811m	site 1	AGCCCTTCGCT	AGCCCCTCGCT	Confirmed	homo
Ciclev10000756m	site 1	TAACACTCTGA	TAACACTCTGA;TAACATTCTGA	Confirmed	heter
Ciclev10003235m	site 1	GAGCTCGTGTG;GAGCTTGTGTG	GAGCTTGTGTG	Confirmed	heter
Ciclev10004790m	site 1	TGATTATACTC;TGATTGTACTC	TGATTGTACTC	Confirmed	heter
Ciclev10012594m	site 1	TCATGTATCAG	TCATGCATCAG	Confirmed	homo
	site 2	ACAATCAAAGC	ACAATTAAAGC	Confirmed	homo
Ciclev10000115m	site 1	CCACACGAATC	CCACATGAATC	Confirmed	homo
	site 2	CATGCCGCAGA	CATGCAGCAGA	Confirmed	homo
Ciclev10025281m	site 1	ATTTAAGTATTTT	ATTTAAGTATTTT,ATTTCAGTATTTT	Confirmed	heter
Ciclev10027954m	site 1	CCACAAATATG	CCACAGATATG	Confirmed	homo
Ciclev10008515m	site 1	GCATCTGCATC	GCATCCGCATC	Confirmed	homo
	site 2	AGGACGGTCATGACCAACATCTTTCTTT	AGGACGAT--------------TCTTT	Confirmed	homo
	site 3	TCAAATACAGG	TCAAACACAGG	Confirmed	homo
	site 4	TCATTCATTAA	TCATTAATATT	Confirmed	homo
	site 5	GTGGC-------------------GCTCAC	GTGGCTTTGGGTATTCATTGTGGCACTCAC	Confirmed	homo
	site 6	ATCTTCATGCA	ATCTTGATGCA	Confirmed	homo
	site 7	ATTTAATTTTT	ATTTA-TTTTT	Confirmed	homo
	site 8	AACATGCATAGA	AACATATATAGA	Confirmed	homo
Ciclev10007219m	site 1	CAAGG-CTTTT	CAAGGGCTTTT	Confirmed	homo
Ciclev10031726m	site 1	TTTTTATTTTT	TTTTTTTTTTT	Confirmed	homo
Ciclev10012588m	site 1	AACAGTGGCTA,AACAGAGGCTA	AACAGTGGCTA	Confirmed	heter

## Sheet: Table S5
Table S5 Mobile gnens detected in leaves and stems
Gene ID	Direction		Tissues	Annotation
Ciclev10000024m	stock to scion		Leaves	UDP-glucose:glycoprotein glucosyltransferases;transferases, transferring hexosyl groups;transferases, transferring glycosyl groups
Ciclev10000027m		scion to stock	Leaves	PHD finger family protein
Ciclev10000030m		scion to stock	Leaves	RNA helicase family protein
Ciclev10000045m		scion to stock	Leaves	RAD3-like DNA-binding helicase protein
Ciclev10000073m	stock to scion		Leaves	NB-ARC domain-containing disease resistance protein
Ciclev10000089m	stock to scion		Leaves	phospholipase D P2
Ciclev10000111m		scion to stock	Leaves	NB-ARC domain-containing disease resistance protein
Ciclev10000121m	stock to scion		Leaves	global transcription factor group A2
Ciclev10000123m	stock to scion		Leaves	NB-ARC domain-containing disease resistance protein
Ciclev10000129m		scion to stock	Leaves	ATPase E1-E2 type family protein / haloacid dehalogenase-like hydrolase family protein
Ciclev10000132m		scion to stock	Leaves	ATPase E1-E2 type family protein / haloacid dehalogenase-like hydrolase family protein
Ciclev10000136m		scion to stock	Leaves	NB-ARC domain-containing disease resistance protein
Ciclev10000139m		scion to stock	Leaves	Spc97 / Spc98 family of spindle pole body (SBP) component
Ciclev10000141m		scion to stock	Leaves	receptor like protein 6
Ciclev10000142m	stock to scion		Leaves	endoplasmic reticulum-type calcium-transporting ATPase 3
Ciclev10000152m	stock to scion	scion to stock	Leaves	heteroglycan glucosidase 1
Ciclev10000159m	stock to scion		Leaves	transcription coactivators
Ciclev10000162m		scion to stock	Leaves	receptor like protein 6
Ciclev10000168m	stock to scion		Leaves	exoribonuclease 4
Ciclev10000172m	stock to scion		Leaves	Ubiquitin-like superfamily protein
Ciclev10000179m		scion to stock	Leaves	NB-ARC domain-containing disease resistance protein
Ciclev10000204m		scion to stock	Leaves	Phosphoinositide phosphatase family protein
Ciclev10000229m		scion to stock	Leaves	Pentatricopeptide repeat (PPR-like) superfamily protein
Ciclev10000233m	stock to scion		Leaves	SART-1 family
Ciclev10000247m		scion to stock	Leaves	trehalose phosphatase/synthase 5
Ciclev10000257m		scion to stock	Leaves	putative protein kinase 1
Ciclev10000268m	stock to scion		Leaves	haloacid dehalogenase-like hydrolase family protein
Ciclev10000277m		scion to stock	Leaves	NB-ARC domain-containing disease resistance protein
Ciclev10000298m		scion to stock	Leaves	Prolyl oligopeptidase family protein
Ciclev10000333m	stock to scion		Leaves	Nucleoporin autopeptidase
Ciclev10000345m	stock to scion	scion to stock	Leaves	Leucine-rich repeat protein kinase family protein
Ciclev10000346m	stock to scion	scion to stock	Leaves	C2 calcium/lipid-binding plant phosphoribosyltransferase family protein
Ciclev10000349m		scion to stock	Leaves	Subtilisin-like serine endopeptidase family protein
Ciclev10000351m		scion to stock	Leaves	S-locus lectin protein kinase family protein
Ciclev10000365m	stock to scion		Leaves	GDSL-like Lipase/Acylhydrolase superfamily protein
Ciclev10000378m		scion to stock	Leaves	Esterase/lipase/thioesterase family protein
Ciclev10000421m		scion to stock	Leaves	Protein kinase protein with adenine nucleotide alpha hydrolases-like domain
Ciclev10000433m	stock to scion		Leaves	chloroplast heat shock protein 70-2
Ciclev10000444m		scion to stock	Leaves	solute:sodium symporters;urea transmembrane transporters
Ciclev10000476m		scion to stock	Leaves	RNA-binding KH domain-containing protein
Ciclev10000528m	stock to scion	scion to stock	Leaves	sulfate transporter 1;3
Ciclev10000549m		scion to stock	Leaves	Plant protein of unknown function (DUF869)
Ciclev10000567m		scion to stock	Leaves	RH39
Ciclev10000572m		scion to stock	Leaves	loricrin-related
Ciclev10000583m		scion to stock	Leaves	Flavodoxin family protein
Ciclev10000596m	stock to scion		Leaves	Major facilitator superfamily protein
Ciclev10000602m	stock to scion		Leaves	Prefoldin chaperone subunit family protein
Ciclev10000621m		scion to stock	Leaves	trehalase 1
Ciclev10000631m		scion to stock	Leaves	nuclear matrix protein-related
Ciclev10000645m	stock to scion		Leaves	with no lysine (K) kinase 4
Ciclev10000652m		scion to stock	Leaves	O-fucosyltransferase family protein
Ciclev10000653m		scion to stock	Leaves	cysteine-rich RLK (RECEPTOR-like protein kinase) 10
Ciclev10000673m		scion to stock	Leaves	Phototropic-responsive NPH3 family protein
Ciclev10000689m		scion to stock	Leaves	FAD/NAD(P)-binding oxidoreductase family protein
Ciclev10000699m		scion to stock	Leaves	ENHANCED DISEASE RESISTANCE 2
Ciclev10000710m	stock to scion	scion to stock	Leaves	phosphatidylserine decarboxylase 2
Ciclev10000722m		scion to stock	Leaves	Sugar isomerase (SIS) family protein
Ciclev10000725m	stock to scion		Leaves	RING/FYVE/PHD-type zinc finger family protein
Ciclev10000733m		scion to stock	Leaves	Calmodulin-binding protein
Ciclev10000759m	stock to scion		Leaves	Polynucleotidyl transferase, ribonuclease H-like superfamily protein
Ciclev10000763m		scion to stock	Leaves	RING/FYVE/PHD zinc finger superfamily protein
Ciclev10000797m		scion to stock	Leaves	P-loop containing nucleoside triphosphate hydrolases superfamily protein
Ciclev10000812m		scion to stock	Leaves	Chaperone DnaJ-domain superfamily protein
Ciclev10000821m		scion to stock	Leaves	Pheophorbide a oxygenase family protein with Rieske [2Fe-2S] domain
Ciclev10000850m	stock to scion		Leaves	C2H2 and C2HC zinc fingers superfamily protein
Ciclev10000851m		scion to stock	Leaves	cytochrome P450, family 82, subfamily C, polypeptide 4
Ciclev10000858m		scion to stock	Leaves	O-fucosyltransferase family protein
Ciclev10000863m	stock to scion		Leaves	P-loop containing nucleoside triphosphate hydrolases superfamily protein
Ciclev10000867m		scion to stock	Leaves	Pentatricopeptide repeat (PPR) superfamily protein
Ciclev10000876m		scion to stock	Leaves	Protein kinase family protein
Ciclev10000877m		scion to stock	Leaves	Glycinamide ribonucleotide (GAR) synthetase
Ciclev10000884m		scion to stock	Leaves	GA requiring 3
Ciclev10000885m		scion to stock	Leaves
Ciclev10000917m		scion to stock	Leaves	UDP-Glycosyltransferase superfamily protein
Ciclev10000918m		scion to stock	Leaves	cytochrome P450, family 81, subfamily D, polypeptide 8
Ciclev10000919m		scion to stock	Leaves	ACT-like protein tyrosine kinase family protein
Ciclev10000928m		scion to stock	Leaves	UDP-Glycosyltransferase superfamily protein
Ciclev10000934m		scion to stock	Leaves	cytochrome P450, family 81, subfamily D, polypeptide 8
Ciclev10000941m		scion to stock	Leaves	sucrose transporter 4
Ciclev10000944m		scion to stock	Leaves	UDP-Glycosyltransferase superfamily protein
Ciclev10000950m		scion to stock	Leaves	MATE efflux family protein
Ciclev10000960m	stock to scion	scion to stock	Leaves	Major facilitator superfamily protein
Ciclev10000967m		scion to stock	Leaves	cytochrome P450, family 81, subfamily D, polypeptide 4
Ciclev10000980m		scion to stock	Leaves	Major facilitator superfamily protein
Ciclev10000990m		scion to stock	Leaves	Tetratricopeptide repeat (TPR)-like superfamily protein
Ciclev10000998m	stock to scion		Leaves	serine carboxypeptidase-like 42
Ciclev10001014m		scion to stock	Leaves	uridine 5\'-monophosphate synthase / UMP synthase (PYRE-F) (UMPS)
Ciclev10001029m		scion to stock	Leaves	alpha/beta-Hydrolases superfamily protein
Ciclev10001035m	stock to scion		Leaves	emp24/gp25L/p24 family/GOLD family protein
Ciclev10001037m	stock to scion		Leaves	camphor resistance CrcB family protein
Ciclev10001054m		scion to stock	Leaves	Granulin repeat cysteine protease family protein
Ciclev10001057m		scion to stock	Leaves	pyridoxin (pyrodoxamine) 5\'-phosphate oxidase
Ciclev10001071m	stock to scion		Leaves	UDP-Glycosyltransferase superfamily protein
Ciclev10001095m		scion to stock	Leaves	UDP-Glycosyltransferase superfamily protein
Ciclev10001099m	stock to scion		Leaves	ARID/BRIGHT DNA-binding domain-containing protein
Ciclev10001100m		scion to stock	Leaves	ACT domain repeat 3
Ciclev10001126m		scion to stock	Leaves	Transducin/WD40 repeat-like superfamily protein
Ciclev10001145m		scion to stock	Leaves	glycerol-3-phosphate acyltransferase 3
Ciclev10001148m		scion to stock	Leaves	polypyrimidine tract-binding protein 3
Ciclev10001181m		scion to stock	Leaves	interferon-related developmental regulator family protein / IFRD protein family
Ciclev10001186m	stock to scion		Leaves
Ciclev10001190m		scion to stock	Leaves	Pseudouridine synthase family protein
Ciclev10001214m		scion to stock	Leaves	RNA-binding protein 47C
Ciclev10001225m	stock to scion		Leaves
Ciclev10001262m		scion to stock	Leaves	Glycosyl hydrolase superfamily protein
Ciclev10001263m	stock to scion		Leaves	Major facilitator superfamily protein
Ciclev10001274m		scion to stock	Leaves	histidinol phosphate aminotransferase 1
Ciclev10001278m		scion to stock	Leaves	fucosyltransferase 13
Ciclev10001288m		scion to stock	Leaves
Ciclev10001295m		scion to stock	Leaves	NagB/RpiA/CoA transferase-like superfamily protein
Ciclev10001304m		scion to stock	Leaves	purin 7
Ciclev10001305m		scion to stock	Leaves
Ciclev10001308m		scion to stock	Leaves	galactinol synthase 2
Ciclev10001356m		scion to stock	Leaves	sirtuin 2
Ciclev10001357m	stock to scion	scion to stock	Leaves
Ciclev10001376m	stock to scion		Leaves	TESMIN/TSO1-like CXC 2
Ciclev10001386m		scion to stock	Leaves	Proteasome component (PCI) domain protein
Ciclev10001414m		scion to stock	Leaves	NAD(P)-binding Rossmann-fold superfamily protein
Ciclev10001432m	stock to scion		Leaves	oxidoreductase, 2OG-Fe(II) oxygenase family protein
Ciclev10001434m	stock to scion		Leaves	Serine protease inhibitor (SERPIN) family protein
Ciclev10001446m	stock to scion		Leaves	Zinc-binding alcohol dehydrogenase family protein
Ciclev10001457m		scion to stock	Leaves	Zinc-binding alcohol dehydrogenase family protein
Ciclev10001464m		scion to stock	Leaves	D111/G-patch domain-containing protein
Ciclev10001487m		scion to stock	Leaves	phosphotyrosyl phosphatase activator (PTPA) family protein
Ciclev10001514m		scion to stock	Leaves
Ciclev10001515m		scion to stock	Leaves	BUB1-related (BUB1: budding uninhibited by benzymidazol 1)
Ciclev10001551m		scion to stock	Leaves	NAD(P)-linked oxidoreductase superfamily protein
Ciclev10001571m		scion to stock	Leaves	Tetrapyrrole (Corrin/Porphyrin) Methylases
Ciclev10001601m		scion to stock	Leaves	Protein of unknown function (DUF1644)
Ciclev10001605m	stock to scion		Leaves	RNA-binding (RRM/RBD/RNP motifs) family protein
Ciclev10001620m		scion to stock	Leaves	senescence-related gene 1
Ciclev10001623m	stock to scion		Leaves	senescence-related gene 1
Ciclev10001644m	stock to scion		Leaves	repressor of lrx1
Ciclev10001649m		scion to stock	Leaves	xyloglucan endotransglucosylase/hydrolase 30
Ciclev10001672m	stock to scion		Leaves	Protein kinase superfamily protein
Ciclev10001677m		scion to stock	Leaves	2-oxoglutarate (2OG) and Fe(II)-dependent oxygenase superfamily protein
Ciclev10001682m		scion to stock	Leaves	S-adenosyl-L-methionine-dependent methyltransferases superfamily protein
Ciclev10001700m		scion to stock	Leaves
Ciclev10001712m		scion to stock	Leaves	GDSL-like Lipase/Acylhydrolase superfamily protein
Ciclev10001726m	stock to scion		Leaves	Peroxidase superfamily protein
Ciclev10001727m		scion to stock	Leaves	protein tyrosine phosphatase 1
Ciclev10001743m	stock to scion		Leaves	NAD(P)-binding Rossmann-fold superfamily protein
Ciclev10001756m		scion to stock	Leaves	Inositol 1,3,4-trisphosphate 5/6-kinase family protein
Ciclev10001766m		scion to stock	Leaves	alternative oxidase 1A
Ciclev10001775m	stock to scion		Leaves
Ciclev10001792m	stock to scion		Leaves	MRG family protein
Ciclev10001818m	stock to scion		Leaves	Predicted AT-hook DNA-binding family protein
Ciclev10001821m		scion to stock	Leaves	cysteine synthase D1
Ciclev10001844m		scion to stock	Leaves	NAD(P)-binding Rossmann-fold superfamily protein
Ciclev10001847m		scion to stock	Leaves	Predicted AT-hook DNA-binding family protein
Ciclev10001860m		scion to stock	Leaves	Eukaryotic aspartyl protease family protein
Ciclev10001879m		scion to stock	Leaves	Chaperone DnaJ-domain superfamily protein
Ciclev10001891m	stock to scion		Leaves	Protein phosphatase 2C family protein
Ciclev10001942m	stock to scion		Leaves	DNA-damage-repair/toleration protein (DRT102)
Ciclev10001970m		scion to stock	Leaves	EXORDIUM like 2
Ciclev10001975m		scion to stock	Leaves	Phosphoglycerate mutase family protein
Ciclev10001988m		scion to stock	Leaves	nuclear encoded CLP protease 5
Ciclev10001991m		scion to stock	Leaves	Protein prenylyltransferase superfamily protein
Ciclev10002007m	stock to scion		Leaves	SERINE-ARGININE PROTEIN 30
Ciclev10002028m	stock to scion	scion to stock	Leaves	nucleotide repair protein, putative
Ciclev10002029m	stock to scion		Leaves	G-box binding factor 4
Ciclev10002050m		scion to stock	Leaves	SAC3/GANP/Nin1/mts3/eIF-3 p25 family
Ciclev10002052m		scion to stock	Leaves	LRR and NB-ARC domains-containing disease resistance protein
Ciclev10002054m	stock to scion		Leaves	6-phosphogluconolactonase 1
Ciclev10002059m	stock to scion		Leaves	Basic-leucine zipper (bZIP) transcription factor family protein
Ciclev10002074m		scion to stock	Leaves	phloem protein 2-B15
Ciclev10002083m		scion to stock	Leaves	basic helix-loop-helix (bHLH) DNA-binding superfamily protein
Ciclev10002099m		scion to stock	Leaves	Chlorophyll A-B binding family protein
Ciclev10002110m		scion to stock	Leaves	20S proteasome alpha subunit F2
Ciclev10002120m		scion to stock	Leaves	cytochrome c oxidase assembly protein CtaG / Cox11 family
Ciclev10002134m	stock to scion		Leaves
Ciclev10002140m	stock to scion		Leaves	glucose-inhibited division family A protein
Ciclev10002160m		scion to stock	Leaves
Ciclev10002178m	stock to scion	scion to stock	Leaves	photosystem I light harvesting complex gene 5
Ciclev10002186m	stock to scion		Leaves	general regulatory factor 11
Ciclev10002194m		scion to stock	Leaves
Ciclev10002221m		scion to stock	Leaves
Ciclev10002226m		scion to stock	Leaves	N-acetylglucosaminylphosphatidylinositol de-N-acetylase family protein
Ciclev10002254m		scion to stock	Leaves	general regulatory factor 8
Ciclev10002260m		scion to stock	Leaves	alfin-like 6
Ciclev10002311m	stock to scion		Leaves	succinate dehydrogenase 5
Ciclev10002332m		scion to stock	Leaves	Thioredoxin superfamily protein
Ciclev10002349m		scion to stock	Leaves	Dehydrin family protein
Ciclev10002350m		scion to stock	Leaves	thymidylate synthase 1
Ciclev10002356m	stock to scion	scion to stock	Leaves	Cyclophilin-like peptidyl-prolyl cis-trans isomerase family protein
Ciclev10002360m		scion to stock	Leaves
Ciclev10002389m		scion to stock	Leaves	SNF7 family protein
Ciclev10002401m	stock to scion	scion to stock	Leaves	Ribosomal protein L21
Ciclev10002412m		scion to stock	Leaves	DnaJ/Hsp40 cysteine-rich domain superfamily protein
Ciclev10002417m		scion to stock	Leaves	F-box family protein
Ciclev10002418m		scion to stock	Leaves	Drought-responsive family protein
Ciclev10002428m		scion to stock	Leaves	DUTP-PYROPHOSPHATASE-LIKE 1
Ciclev10002435m		scion to stock	Leaves	C-8,7 sterol isomerase
Ciclev10002442m	stock to scion		Leaves
Ciclev10002444m		scion to stock	Leaves	LisH and RanBPM domains containing protein
Ciclev10002470m		scion to stock	Leaves	ribosomal protein S9
Ciclev10002478m	stock to scion		Leaves	Single hybrid motif superfamily protein
Ciclev10002493m		scion to stock	Leaves
Ciclev10002513m		scion to stock	Leaves	Nascent polypeptide-associated complex (NAC), alpha subunit family protein
Ciclev10002520m	stock to scion		Leaves
Ciclev10002531m	stock to scion		Leaves	cold regulated gene 27
Ciclev10002541m	stock to scion		Leaves	SEC14 cytosolic factor family protein / phosphoglyceride transfer family protein
Ciclev10002551m	stock to scion		Leaves	RAC-like GTP binding protein 5
Ciclev10002562m		scion to stock	Leaves	endoplasmatic reticulum retrieval protein 1B
Ciclev10002575m	stock to scion		Leaves
Ciclev10002586m		scion to stock	Leaves	appr-1-p processing enzyme family protein
Ciclev10002632m	stock to scion	scion to stock	Leaves	Cystatin/monellin superfamily protein
Ciclev10002634m		scion to stock	Leaves	pseudouridine synthase and archaeosine transglycosylase (PUA) domain-containing protein
Ciclev10002639m		scion to stock	Leaves	Transport protein particle (TRAPP) component
Ciclev10002644m		scion to stock	Leaves
Ciclev10002646m	stock to scion		Leaves	Ankyrin repeat family protein
Ciclev10002653m	stock to scion		Leaves	Protein of unknown function (DUF1000)
Ciclev10002655m	stock to scion		Leaves	glycosyltransferase family protein 28
Ciclev10002669m		scion to stock	Leaves	Ribosomal protein L31
Ciclev10002700m	stock to scion		Leaves
Ciclev10002705m	stock to scion	scion to stock	Leaves	Signal peptidase subunit
Ciclev10002731m	stock to scion		Leaves	basic leucine-zipper 44
Ciclev10002733m		scion to stock	Leaves	related to AP2 1
Ciclev10002741m		scion to stock	Leaves	sumo conjugation enzyme 1
Ciclev10002782m		scion to stock	Leaves	high mobility group B3
Ciclev10002818m	stock to scion	scion to stock	Leaves
Ciclev10002833m		scion to stock	Leaves	vacuolar ATPase subunit F family protein
Ciclev10002835m	stock to scion		Leaves
Ciclev10002883m		scion to stock	Leaves	Defender against death (DAD family) protein
Ciclev10002906m		scion to stock	Leaves
Ciclev10002908m	stock to scion		Leaves
Ciclev10002921m		scion to stock	Leaves	SH3 domain-containing protein
Ciclev10002947m	stock to scion		Leaves	Hypoxia-responsive family protein
Ciclev10002950m	stock to scion		Leaves	Small nuclear ribonucleoprotein family protein
Ciclev10002958m		scion to stock	Leaves
Ciclev10002971m	stock to scion		Leaves
Ciclev10003010m		scion to stock	Leaves
Ciclev10003019m		scion to stock	Leaves
Ciclev10003044m	stock to scion		Leaves	NADH dehydrogenase (ubiquinone)s
Ciclev10003046m	stock to scion	scion to stock	Leaves	NADH dehydrogenase (ubiquinone)s
Ciclev10003057m	stock to scion		Leaves	Mitochondrial outer membrane translocase complex, subunit Tom7
Ciclev10003066m		scion to stock	Leaves
Ciclev10003078m		scion to stock	Leaves
Ciclev10003088m		scion to stock	Leaves
Ciclev10003114m		scion to stock	Leaves
Ciclev10003121m		scion to stock	Leaves	NB-ARC domain-containing disease resistance protein
Ciclev10003135m		scion to stock	Leaves	NB-ARC domain-containing disease resistance protein
Ciclev10003140m		scion to stock	Leaves	clone eighty-four
Ciclev10003149m		scion to stock	Leaves
Ciclev10003155m		scion to stock	Leaves	LRR and NB-ARC domains-containing disease resistance protein
Ciclev10003164m		scion to stock	Leaves	NB-ARC domain-containing disease resistance protein
Ciclev10003167m		scion to stock	Leaves	ACT domain-containing protein
Ciclev10003188m	stock to scion		Leaves	NB-ARC domain-containing disease resistance protein
Ciclev10003191m		scion to stock	Leaves	Protein of unknown function (DUF1399)
Ciclev10003209m		scion to stock	Leaves
Ciclev10003214m	stock to scion		Leaves	Inorganic H pyrophosphatase family protein
Ciclev10003235m		scion to stock	Leaves	Frigida-like protein
Ciclev10003249m	stock to scion		Leaves	BTB/POZ domain-containing protein
Ciclev10003259m		scion to stock	Leaves
Ciclev10003263m		scion to stock	Leaves	Cystatin/monellin superfamily protein
Ciclev10003312m		scion to stock	Leaves	conserved telomere maintenance component 1
Ciclev10003326m		scion to stock	Leaves	ATPase E1-E2 type family protein / haloacid dehalogenase-like hydrolase family protein
Ciclev10003372m		scion to stock	Leaves	rotamase FKBP 1
Ciclev10003386m	stock to scion		Leaves	receptor like protein 47
Ciclev10003403m	stock to scion		Leaves	Pentatricopeptide repeat (PPR) superfamily protein
Ciclev10003406m		scion to stock	Leaves	cytochrome P450, family 87, subfamily A, polypeptide 6
Ciclev10003416m		scion to stock	Leaves	NB-ARC domain-containing disease resistance protein
Ciclev10003420m	stock to scion		Leaves	Inorganic H pyrophosphatase family protein
Ciclev10003442m		scion to stock	Leaves
Ciclev10003473m	stock to scion		Leaves	Protein kinase superfamily protein
Ciclev10003480m		scion to stock	Leaves	NAD(P)-binding Rossmann-fold superfamily protein
Ciclev10003488m		scion to stock	Leaves	cysteine synthase D1
Ciclev10003498m		scion to stock	Leaves	Protein kinase superfamily protein
Ciclev10003505m		scion to stock	Leaves	NB-ARC domain-containing disease resistance protein
Ciclev10003522m		scion to stock	Leaves	NB-ARC domain-containing disease resistance protein
Ciclev10003529m		scion to stock	Leaves	carboxypeptidase D, putative
Ciclev10003540m		scion to stock	Leaves	receptor like protein 12
Ciclev10003549m	stock to scion		Leaves
Ciclev10003565m		scion to stock	Leaves	conserved telomere maintenance component 1
Ciclev10003574m		scion to stock	Leaves	phloem protein 2-B15
Ciclev10003619m		scion to stock	Leaves	ACT-like protein tyrosine kinase family protein
Ciclev10003653m	stock to scion		Leaves	Tetratricopeptide repeat (TPR)-like superfamily protein
Ciclev10003669m		scion to stock	Leaves	SH3 domain-containing protein
Ciclev10003671m	stock to scion		Leaves	purple acid phosphatase 12
Ciclev10003685m	stock to scion		Leaves	NB-ARC domain-containing disease resistance protein
Ciclev10003731m		scion to stock	Leaves	Disease resistance protein (TIR-NBS-LRR class) family
Ciclev10003865m		scion to stock	Leaves	NB-ARC domain-containing disease resistance protein
Ciclev10003867m		scion to stock	Leaves	NAD(P)-binding Rossmann-fold superfamily protein
Ciclev10003878m		scion to stock	Leaves	Regulator of chromosome condensation (RCC1) family protein
Ciclev10003892m	stock to scion		Leaves	zinc finger (C2H2 type) family protein
Ciclev10003894m	stock to scion	scion to stock	Leaves	NB-ARC domain-containing disease resistance protein
Ciclev10003896m		scion to stock	Leaves	Integrase-type DNA-binding superfamily protein
Ciclev10003913m	stock to scion		Leaves	D-aminoacid aminotransferase-like PLP-dependent enzymes superfamily protein
Ciclev10003916m		scion to stock	Leaves	transducin family protein / WD-40 repeat family protein
Ciclev10003922m		scion to stock	Leaves	Pleckstrin homology (PH) domain-containing protein / lipid-binding START domain-containing protein
Ciclev10003923m		scion to stock	Leaves	Protein kinase superfamily protein
Ciclev10003974m		scion to stock	Leaves	LRR and NB-ARC domains-containing disease resistance protein
Ciclev10004031m		scion to stock	Leaves	UDP-glucosyl transferase 85A2
Ciclev10004042m	stock to scion	scion to stock	Leaves	NB-ARC domain-containing disease resistance protein
Ciclev10004045m	stock to scion	scion to stock	Leaves	receptor like protein 15
Ciclev10004054m		scion to stock	Leaves	NB-ARC domain-containing disease resistance protein
Ciclev10004059m	stock to scion	scion to stock	Leaves
Ciclev10004073m	stock to scion		Leaves
Ciclev10004079m	stock to scion		Leaves	S-adenosyl-L-methionine-dependent methyltransferases superfamily protein
Ciclev10004081m		scion to stock	Leaves
Ciclev10004084m		scion to stock	Leaves	EMBRYO DEFECTIVE 140
Ciclev10004087m		scion to stock	Leaves
Ciclev10004125m		scion to stock	Leaves	HAC13 protein (HAC13)
Ciclev10004136m		scion to stock	Leaves	time for coffee
Ciclev10004137m		scion to stock	Leaves	glutamate synthase 1
Ciclev10004140m		scion to stock	Leaves	HAC13 protein (HAC13)
Ciclev10004142m		scion to stock	Leaves	INO80 ortholog
Ciclev10004149m		scion to stock	Leaves	multidrug resistance-associated protein 14
Ciclev10004153m	stock to scion		Leaves
Ciclev10004166m	stock to scion		Leaves	DNA repair-recombination protein (RAD50)
Ciclev10004169m	stock to scion		Leaves	putative recombination initiation defect 1
Ciclev10004174m		scion to stock	Leaves	disease resistance protein (TIR-NBS-LRR class), putative
Ciclev10004186m	stock to scion		Leaves	DNA binding
Ciclev10004215m	stock to scion	scion to stock	Leaves	zinc knuckle (CCHC-type) family protein
Ciclev10004221m		scion to stock	Leaves	sucrose phosphate synthase 3F
Ciclev10004230m		scion to stock	Leaves	ARM repeat superfamily protein
Ciclev10004244m	stock to scion		Leaves
Ciclev10004246m		scion to stock	Leaves	disease resistance protein (TIR-NBS-LRR class), putative
Ciclev10004266m		scion to stock	Leaves	Leucine-rich repeat protein kinase family protein
Ciclev10004308m		scion to stock	Leaves	binding
Ciclev10004319m		scion to stock	Leaves	binding
Ciclev10004324m	stock to scion		Leaves	molybdenum cofactor sulfurase (LOS5) (ABA3)
Ciclev10004338m	stock to scion		Leaves	U-box domain-containing protein kinase family protein
Ciclev10004342m	stock to scion		Leaves	acyl-CoA dehydrogenase-related
Ciclev10004351m		scion to stock	Leaves	Protein kinase superfamily protein
Ciclev10004361m		scion to stock	Leaves	CwfJ-like family protein
Ciclev10004388m	stock to scion		Leaves	Tetratricopeptide repeat (TPR)-like superfamily protein
Ciclev10004389m		scion to stock	Leaves	non-intrinsic ABC protein 8
Ciclev10004396m		scion to stock	Leaves
Ciclev10004398m		scion to stock	Leaves	SNF2 domain-containing protein / helicase domain-containing protein
Ciclev10004399m	stock to scion		Leaves	seed imbibition 2
Ciclev10004418m	stock to scion		Leaves	cellulose synthase like G2
Ciclev10004432m		scion to stock	Leaves	Deoxyxylulose-5-phosphate synthase
Ciclev10004433m		scion to stock	Leaves	Pentatricopeptide repeat (PPR) superfamily protein
Ciclev10004438m	stock to scion	scion to stock	Leaves	DNA GYRASE B2
Ciclev10004446m	stock to scion		Leaves
Ciclev10004486m	stock to scion		Leaves	Spc97 / Spc98 family of spindle pole body (SBP) component
Ciclev10004507m		scion to stock	Leaves	Glycosyl hydrolase superfamily protein
Ciclev10004527m		scion to stock	Leaves	NIMA-related kinase 5
Ciclev10004533m		scion to stock	Leaves	indeterminate(ID)-domain 4
Ciclev10004551m	stock to scion	scion to stock	Leaves	protein kinase family protein / peptidoglycan-binding LysM domain-containing protein
Ciclev10004572m		scion to stock	Leaves	ATP citrate lyase subunit B 2
Ciclev10004587m	stock to scion	scion to stock	Leaves	Pentatricopeptide repeat (PPR) superfamily protein
Ciclev10004605m		scion to stock	Leaves	RPM1 interacting protein 2
Ciclev10004623m		scion to stock	Leaves	Amidohydrolase family
Ciclev10004632m		scion to stock	Leaves
Ciclev10004641m	stock to scion		Leaves	acyl-activating enzyme 7
Ciclev10004647m	stock to scion		Leaves	methyl-CPG-binding domain protein 13
Ciclev10004649m	stock to scion		Leaves	acyl-activating enzyme 7
Ciclev10004681m		scion to stock	Leaves	elongation defective 1 protein / ELD1 protein
Ciclev10004699m	stock to scion		Leaves
Ciclev10004724m		scion to stock	Leaves	MOS4-associated complex 3B
Ciclev10004731m	stock to scion	scion to stock	Leaves	ADP glucose pyrophosphorylase large subunit 1
Ciclev10004732m	stock to scion		Leaves	AMP-dependent synthetase and ligase family protein
Ciclev10004733m		scion to stock	Leaves	cytochrome P450, family 706, subfamily A, polypeptide 4
Ciclev10004756m	stock to scion		Leaves	Leucine-rich repeat (LRR) family protein
Ciclev10004757m		scion to stock	Leaves	Peptidase S41 family protein
Ciclev10004767m		scion to stock	Leaves	Transducin/WD40 repeat-like superfamily protein
Ciclev10004771m		scion to stock	Leaves	Tetratricopeptide repeat (TPR)-like superfamily protein
Ciclev10004781m		scion to stock	Leaves	Major facilitator superfamily protein
Ciclev10004788m		scion to stock	Leaves	CBS domain-containing protein with a domain of unknown function (DUF21)
Ciclev10004798m		scion to stock	Leaves	Major facilitator superfamily protein
Ciclev10004819m		scion to stock	Leaves	glutathione-disulfide reductase
Ciclev10004838m		scion to stock	Leaves	glycosyltransferase 18
Ciclev10004847m		scion to stock	Leaves	XB3 ortholog 5 in Arabidopsis thaliana
Ciclev10004848m		scion to stock	Leaves	selenium-binding protein 2
Ciclev10004870m	stock to scion		Leaves	HXXXD-type acyl-transferase family protein
Ciclev10004874m		scion to stock	Leaves
Ciclev10004875m		scion to stock	Leaves	ureidoglycolate amidohydrolase
Ciclev10004887m	stock to scion		Leaves	Nuclear transport factor 2 (NTF2) family protein with RNA binding (RRM-RBD-RNP motifs) domain
Ciclev10004888m		scion to stock	Leaves	Transducin family protein / WD-40 repeat family protein
Ciclev10004891m	stock to scion		Leaves	Phosphoglycerate kinase family protein
Ciclev10004896m		scion to stock	Leaves	HXXXD-type acyl-transferase family protein
Ciclev10004900m		scion to stock	Leaves
Ciclev10004901m		scion to stock	Leaves	cyclic nucleotide gated channel 1
Ciclev10004906m		scion to stock	Leaves	HXXXD-type acyl-transferase family protein
Ciclev10004912m		scion to stock	Leaves	HXXXD-type acyl-transferase family protein
Ciclev10004916m		scion to stock	Leaves	uridine 5\'-monophosphate synthase / UMP synthase (PYRE-F) (UMPS)
Ciclev10004922m		scion to stock	Leaves	Protein of unknown function (DUF819)
Ciclev10004924m	stock to scion		Leaves	coenzyme F420 hydrogenase family / dehydrogenase, beta subunit family
Ciclev10004947m	stock to scion		Leaves	pigment defective 320
Ciclev10004956m	stock to scion		Leaves	IQ-domain 24
Ciclev10004974m		scion to stock	Leaves	S-adenosyl-L-methionine-dependent methyltransferases superfamily protein
Ciclev10004983m		scion to stock	Leaves	eukaryotic translation initiation factor 3E
Ciclev10004984m		scion to stock	Leaves	Homeodomain-like superfamily protein
Ciclev10004987m		scion to stock	Leaves	Peptidase family M48 family protein
Ciclev10004989m		scion to stock	Leaves	response regulator 2
Ciclev10004993m		scion to stock	Leaves	Eukaryotic aspartyl protease family protein
Ciclev10005027m	stock to scion		Leaves	DREB2A-interacting protein 2
Ciclev10005038m	stock to scion		Leaves	Eukaryotic aspartyl protease family protein
Ciclev10005068m		scion to stock	Leaves	NAD(P)-linked oxidoreductase superfamily protein
Ciclev10005071m		scion to stock	Leaves
Ciclev10005087m		scion to stock	Leaves	basic helix-loop-helix (bHLH) DNA-binding superfamily protein
Ciclev10005105m		scion to stock	Leaves	Tyrosyl-tRNA synthetase, class Ib, bacterial/mitochondrial
Ciclev10005119m		scion to stock	Leaves	pfkB-like carbohydrate kinase family protein
Ciclev10005148m	stock to scion		Leaves	lysophosphatidyl acyltransferase 2
Ciclev10005167m		scion to stock	Leaves	Nucleotide-sugar transporter family protein
Ciclev10005196m		scion to stock	Leaves	mercaptopyruvate sulfurtransferase 1
Ciclev10005200m		scion to stock	Leaves	Protein phosphatase 2C family protein
Ciclev10005210m		scion to stock	Leaves	2-oxoglutarate (2OG) and Fe(II)-dependent oxygenase superfamily protein
Ciclev10005219m		scion to stock	Leaves	vamp/synaptobrevin-associated protein 27-2
Ciclev10005220m		scion to stock	Leaves	cytokinin response factor 4
Ciclev10005227m	stock to scion		Leaves	NAD(P)-linked oxidoreductase superfamily protein
Ciclev10005243m		scion to stock	Leaves	alpha/beta-Hydrolases superfamily protein
Ciclev10005246m		scion to stock	Leaves	autophagy protein Apg5 family
Ciclev10005267m	stock to scion		Leaves	2-oxoglutarate (2OG) and Fe(II)-dependent oxygenase superfamily protein
Ciclev10005298m	stock to scion		Leaves	alpha/beta-Hydrolases superfamily protein
Ciclev10005301m		scion to stock	Leaves	Protein phosphatase 2C family protein
Ciclev10005323m		scion to stock	Leaves	ribonucleotide reductase 2A
Ciclev10005347m	stock to scion		Leaves	Per1-like family protein
Ciclev10005361m	stock to scion		Leaves	S-adenosyl-L-methionine-dependent methyltransferases superfamily protein
Ciclev10005381m		scion to stock	Leaves	Protein of unknown function (DUF2361)
Ciclev10005393m	stock to scion		Leaves	double-stranded DNA binding
Ciclev10005394m		scion to stock	Leaves	Lactate/malate dehydrogenase family protein
Ciclev10005415m	stock to scion		Leaves	NagB/RpiA/CoA transferase-like superfamily protein
Ciclev10005425m		scion to stock	Leaves	alpha/beta-Hydrolases superfamily protein
Ciclev10005436m	stock to scion		Leaves	4-phospho-panto-thenoylcysteine synthetase
Ciclev10005470m		scion to stock	Leaves	HSP20-like chaperones superfamily protein
Ciclev10005473m	stock to scion	scion to stock	Leaves	NAD(P)-binding Rossmann-fold superfamily protein
Ciclev10005479m		scion to stock	Leaves	Cyclin-like family protein
Ciclev10005508m		scion to stock	Leaves
Ciclev10005563m	stock to scion		Leaves	Haloacid dehalogenase-like hydrolase (HAD) superfamily protein
Ciclev10005581m		scion to stock	Leaves	ubiquinol-cytochrome C chaperone family protein
Ciclev10005583m		scion to stock	Leaves	STELAR K+ outward rectifier
Ciclev10005594m	stock to scion		Leaves	Remorin family protein
Ciclev10005608m		scion to stock	Leaves	SNARE associated Golgi protein family
Ciclev10005612m	stock to scion		Leaves
Ciclev10005613m		scion to stock	Leaves	Ribosomal protein S5 family protein
Ciclev10005624m	stock to scion		Leaves	phosphoenolpyruvate carboxylase kinase 2
Ciclev10005625m		scion to stock	Leaves	SC35-like splicing factor 28
Ciclev10005632m	stock to scion		Leaves	phytoene desaturase 3
Ciclev10005642m		scion to stock	Leaves	FKBP-like peptidyl-prolyl cis-trans isomerase family protein
Ciclev10005658m		scion to stock	Leaves	GATA transcription factor 1
Ciclev10005671m		scion to stock	Leaves
Ciclev10005675m	stock to scion		Leaves
Ciclev10005694m		scion to stock	Leaves
Ciclev10005696m		scion to stock	Leaves
Ciclev10005697m	stock to scion		Leaves	Alkaline phytoceramidase (aPHC)
Ciclev10005702m	stock to scion	scion to stock	Leaves	SEC14 cytosolic factor family protein / phosphoglyceride transfer family protein
Ciclev10005712m	stock to scion	scion to stock	Leaves
Ciclev10005732m		scion to stock	Leaves	Mitochondrial glycoprotein family protein
Ciclev10005759m		scion to stock	Leaves	alpha/beta-Hydrolases superfamily protein
Ciclev10005766m		scion to stock	Leaves	Aluminium induced protein with YGL and LRDR motifs
Ciclev10005779m		scion to stock	Leaves	glutathione S-transferase tau 7
Ciclev10005783m	stock to scion		Leaves	Double Clp-N motif protein
Ciclev10005792m		scion to stock	Leaves	RING/U-box superfamily protein
Ciclev10005797m		scion to stock	Leaves	nucleotide-sensitive chloride conductance regulator (ICln) family protein
Ciclev10005800m		scion to stock	Leaves	myosin heavy chain-related
Ciclev10005823m	stock to scion		Leaves
Ciclev10005842m		scion to stock	Leaves	Calcium-binding EF-hand family protein
Ciclev10005872m		scion to stock	Leaves	basic helix-loop-helix (bHLH) DNA-binding superfamily protein
Ciclev10005889m		scion to stock	Leaves
Ciclev10005892m		scion to stock	Leaves	photosystem I subunit D-2
Ciclev10005894m		scion to stock	Leaves
Ciclev10005898m		scion to stock	Leaves	Agenet domain-containing protein
Ciclev10005900m		scion to stock	Leaves	Ribosomal protein L13 family protein
Ciclev10005916m		scion to stock	Leaves
Ciclev10005919m	stock to scion		Leaves
Ciclev10005931m	stock to scion		Leaves	RmlC-like cupins superfamily protein
Ciclev10005965m		scion to stock	Leaves	NAD(P)-binding Rossmann-fold superfamily protein
Ciclev10005969m	stock to scion		Leaves
Ciclev10005989m		scion to stock	Leaves	Uncharacterised protein family (UPF0497)
Ciclev10006012m	stock to scion	scion to stock	Leaves	RNA polymerase Rpb7-like, N-terminal domain
Ciclev10006013m		scion to stock	Leaves	Polynucleotidyl transferase, ribonuclease H-like superfamily protein
Ciclev10006017m	stock to scion		Leaves	Protein of unknown function (DUF3464)
Ciclev10006067m		scion to stock	Leaves	SNARE-like superfamily protein
Ciclev10006079m		scion to stock	Leaves	ADP-ribosylation factor A1F
Ciclev10006094m		scion to stock	Leaves
Ciclev10006103m		scion to stock	Leaves
Ciclev10006106m		scion to stock	Leaves	MLP-like protein 423
Ciclev10006122m	stock to scion		Leaves	RPM1 interacting protein 4
Ciclev10006127m		scion to stock	Leaves	Ribosomal protein S19 family protein
Ciclev10006136m		scion to stock	Leaves	Ribosomal L28 family
Ciclev10006143m		scion to stock	Leaves	Uncharacterised protein family (UPF0497)
Ciclev10006145m		scion to stock	Leaves	ribosomal protein S13A
Ciclev10006154m		scion to stock	Leaves	prefoldin 2
Ciclev10006159m	stock to scion		Leaves	glycine-rich RNA-binding protein 2
Ciclev10006171m	stock to scion		Leaves	RNA polymerase Rpb6
Ciclev10006172m		scion to stock	Leaves	GRIM-19 protein
Ciclev10006232m	stock to scion		Leaves	Ubiquitin-like superfamily protein
Ciclev10006261m	stock to scion		Leaves	FK506-binding protein 12
Ciclev10006296m		scion to stock	Leaves	elongation defective 1 protein / ELD1 protein
Ciclev10006331m	stock to scion	scion to stock	Leaves
Ciclev10006432m		scion to stock	Leaves	cellulose synthase family protein
Ciclev10006433m	stock to scion		Leaves	Protein phosphatase 2C family protein
Ciclev10006435m	stock to scion	scion to stock	Leaves	FTSH protease 11
Ciclev10006459m	stock to scion		Leaves	Mitochondrial substrate carrier family protein
Ciclev10006472m	stock to scion		Leaves	U-box domain-containing protein kinase family protein
Ciclev10006489m		scion to stock	Leaves	NAD(P)-binding Rossmann-fold superfamily protein
Ciclev10006492m	stock to scion		Leaves	shortage in chiasmata 1
Ciclev10006533m		scion to stock	Leaves	Major facilitator superfamily protein
Ciclev10006553m		scion to stock	Leaves	GTP binding
Ciclev10006605m	stock to scion		Leaves	GDP-D-mannose 3\',5\'-epimerase
Ciclev10006630m		scion to stock	Leaves	NAD(P)-binding Rossmann-fold superfamily protein
Ciclev10006672m	stock to scion		Leaves	Major facilitator superfamily protein
Ciclev10006738m		scion to stock	Leaves	REF4-related 1
Ciclev10006760m	stock to scion		Leaves	Pentatricopeptide repeat (PPR) superfamily protein
Ciclev10006797m		scion to stock	Leaves	EF-TU receptor
Ciclev10006845m		scion to stock	Leaves	titan9
Ciclev10006852m	stock to scion		Leaves	FRAGILE HISTIDINE TRIAD
Ciclev10006881m	stock to scion		Leaves
Ciclev10006994m	stock to scion		Leaves	alpha/beta-Hydrolases superfamily protein
Ciclev10007034m		scion to stock	Leaves	Cyclopropane-fatty-acyl-phospholipid synthase
Ciclev10007037m		scion to stock	Leaves	Tetratricopeptide repeat (TPR)-like superfamily protein
Ciclev10007055m		scion to stock	Leaves	Agenet domain-containing protein
Ciclev10007058m		scion to stock	Leaves	Leucine-rich repeat protein kinase family protein
Ciclev10007095m	stock to scion		Leaves	Plastid-lipid associated protein PAP / fibrillin family protein
Ciclev10007105m		scion to stock	Leaves
Ciclev10007168m	stock to scion		Leaves	cyclic nucleotide gated channel 1
Ciclev10007189m	stock to scion		Leaves	ARM repeat superfamily protein
Ciclev10007223m		scion to stock	Leaves
Ciclev10007250m	stock to scion		Leaves
Ciclev10007259m		scion to stock	Leaves	Transducin family protein / WD-40 repeat family protein
Ciclev10007272m		scion to stock	Leaves
Ciclev10007274m		scion to stock	Leaves	DEA(D/H)-box RNA helicase family protein
Ciclev10007298m	stock to scion		Leaves	Pentatricopeptide repeat (PPR) superfamily protein
Ciclev10007315m		scion to stock	Leaves	NB-ARC domain-containing disease resistance protein
Ciclev10007331m	stock to scion		Leaves	RNA-dependent RNA polymerase family protein
Ciclev10007341m		scion to stock	Leaves	disease resistance family protein / LRR family protein
Ciclev10007376m		scion to stock	Leaves	NB-ARC domain-containing disease resistance protein
Ciclev10007388m		scion to stock	Leaves
Ciclev10007416m		scion to stock	Leaves	proteinaceous RNase P 3
Ciclev10007428m	stock to scion		Leaves	trehalose phosphatase/synthase 11
Ciclev10007432m		scion to stock	Leaves
Ciclev10007453m	stock to scion		Leaves	receptor kinase 3
Ciclev10007456m		scion to stock	Leaves	ARM repeat superfamily protein
Ciclev10007460m	stock to scion		Leaves	Tetratricopeptide repeat (TPR)-like superfamily protein
Ciclev10007466m		scion to stock	Leaves	S-locus lectin protein kinase family protein
Ciclev10007495m	stock to scion		Leaves	Cyclophilin-like peptidyl-prolyl cis-trans isomerase family protein
Ciclev10007498m		scion to stock	Leaves	DENN (AEX-3) domain-containing protein
Ciclev10007502m		scion to stock	Leaves	Voltage-gated chloride channel family protein
Ciclev10007513m		scion to stock	Leaves	staurosporin and temperature sensitive 3-like A
Ciclev10007518m	stock to scion		Leaves
Ciclev10007520m	stock to scion		Leaves	lectin protein kinase family protein
Ciclev10007532m		scion to stock	Leaves	cycloartenol synthase 1
Ciclev10007535m		scion to stock	Leaves	P450 reductase 2
Ciclev10007536m		scion to stock	Leaves	PLC-like phosphodiesterase family protein
Ciclev10007547m		scion to stock	Leaves	S-locus lectin protein kinase family protein
Ciclev10007563m		scion to stock	Leaves	ARID/BRIGHT DNA-binding domain-containing protein
Ciclev10007569m	stock to scion		Leaves	Actin binding Calponin homology (CH) domain-containing protein
Ciclev10007581m		scion to stock	Leaves	Ubiquitin-like superfamily protein
Ciclev10007586m		scion to stock	Leaves	cellulose synthase like E1
Ciclev10007589m		scion to stock	Leaves	Phox (PX) domain-containing protein
Ciclev10007623m	stock to scion		Leaves	FAD/NAD(P)-binding oxidoreductase family protein
Ciclev10007677m	stock to scion	scion to stock	Leaves	SPOC domain / Transcription elongation factor S-II protein
Ciclev10007698m		scion to stock	Leaves	Exostosin family protein
Ciclev10007752m		scion to stock	Leaves
Ciclev10007754m		scion to stock	Leaves	FGGY family of carbohydrate kinase
Ciclev10007779m	stock to scion	scion to stock	Leaves	S-locus lectin protein kinase family protein
Ciclev10007792m		scion to stock	Leaves	D6 protein kinase like 2
Ciclev10007794m	stock to scion		Leaves	adenylate kinase family protein
Ciclev10007834m	stock to scion		Leaves	Cytosol aminopeptidase family protein
Ciclev10007837m		scion to stock	Leaves	indeterminate(ID)-domain 7
Ciclev10007846m		scion to stock	Leaves	fatty acid biosynthesis 1
Ciclev10007859m	stock to scion	scion to stock	Leaves	Tetratricopeptide repeat (TPR)-like superfamily protein
Ciclev10007884m	stock to scion		Leaves	3beta-hydroxysteroid-dehydrogenase/decarboxylase isoform 2
Ciclev10007886m		scion to stock	Leaves	phosphofructokinase 3
Ciclev10007888m		scion to stock	Leaves	ENTH/VHS family protein
Ciclev10007907m		scion to stock	Leaves	Ankyrin repeat family protein
Ciclev10007927m	stock to scion		Leaves	scarecrow-like 5
Ciclev10007936m		scion to stock	Leaves	monogalactosyl diacylglycerol synthase 1
Ciclev10007967m		scion to stock	Leaves	RING/U-box superfamily protein
Ciclev10007968m		scion to stock	Leaves	RNApolymerase sigma-subunit C
Ciclev10007975m	stock to scion		Leaves	galacturonosyltransferase 12
Ciclev10007976m	stock to scion		Leaves	RING/U-box superfamily protein
Ciclev10007978m		scion to stock	Leaves	calmodulin-domain protein kinase 9
Ciclev10007981m	stock to scion		Leaves	AGC (cAMP-dependent, cGMP-dependent and protein kinase C) kinase family protein
Ciclev10008004m	stock to scion		Leaves	proton pump interactor 1
Ciclev10008014m	stock to scion		Leaves	AGC (cAMP-dependent, cGMP-dependent and protein kinase C) kinase family protein
Ciclev10008020m	stock to scion		Leaves	calmodulin-domain protein kinase 9
Ciclev10008024m		scion to stock	Leaves	Nucleotidyltransferase family protein
Ciclev10008031m		scion to stock	Leaves	polyol/monosaccharide transporter 5
Ciclev10008033m		scion to stock	Leaves	Molecular chaperone Hsp40/DnaJ family protein
Ciclev10008034m	stock to scion		Leaves	Translation elongation factor EF1A/initiation factor IF2gamma family protein
Ciclev10008040m		scion to stock	Leaves	Insulinase (Peptidase family M16) protein
Ciclev10008054m		scion to stock	Leaves	calcium-binding EF hand family protein
Ciclev10008073m		scion to stock	Leaves	cytochrome P450, family 71, subfamily B, polypeptide 34
Ciclev10008086m	stock to scion		Leaves	hexokinase 2
Ciclev10008092m	stock to scion		Leaves	Major facilitator superfamily protein
Ciclev10008099m		scion to stock	Leaves	cytochrome P450, family 76, subfamily C, polypeptide 4
Ciclev10008115m	stock to scion		Leaves	Major facilitator superfamily protein
Ciclev10008136m	stock to scion		Leaves	Major facilitator superfamily protein
Ciclev10008139m		scion to stock	Leaves	Pyridine nucleotide-disulphide oxidoreductase family protein
Ciclev10008145m	stock to scion		Leaves	Sucrase/ferredoxin-like family protein
Ciclev10008147m		scion to stock	Leaves	diacylglycerol kinase 7
Ciclev10008160m	stock to scion	scion to stock	Leaves	casein kinase 1-like protein 2
Ciclev10008164m	stock to scion		Leaves	Ankyrin repeat family protein
Ciclev10008171m		scion to stock	Leaves	ferrochelatase 1
Ciclev10008197m	stock to scion		Leaves	co-factor for nitrate, reductase and xanthine dehydrogenase 5
Ciclev10008200m		scion to stock	Leaves	RNA-binding KH domain-containing protein
Ciclev10008201m	stock to scion		Leaves	alpha/beta-Hydrolases superfamily protein
Ciclev10008209m	stock to scion		Leaves	Nucleic acid-binding, OB-fold-like protein
Ciclev10008210m		scion to stock	Leaves
Ciclev10008213m	stock to scion		Leaves	monogalactosyldiacylglycerol synthase 2
Ciclev10008224m		scion to stock	Leaves	aspartate aminotransferase 5
Ciclev10008244m	stock to scion		Leaves	Pentatricopeptide repeat (PPR-like) superfamily protein
Ciclev10008249m	stock to scion		Leaves	myosin heavy chain-related
Ciclev10008255m		scion to stock	Leaves	mannose-1-phosphate guanylyltransferase (GDP)s;GDP-galactose:mannose-1-phosphate guanylyltransferases;GDP-galactose:glucose-1-phosphate guanylyltransferases;GDP-galactose:myoinositol-1-phosphate guanylyltransferases;glucose-1-phosphate guanylyltransferase
Ciclev10008274m	stock to scion		Leaves	aspartate aminotransferase 3
Ciclev10008313m		scion to stock	Leaves	nudix hydrolase homolog 19
Ciclev10008327m	stock to scion	scion to stock	Leaves	ATP-dependent caseinolytic (Clp) protease/crotonase family protein
Ciclev10008332m	stock to scion		Leaves	galacturonic acid kinase
Ciclev10008372m		scion to stock	Leaves	casein kinase I-like 3
Ciclev10008378m		scion to stock	Leaves	Calcium-dependent lipid-binding (CaLB domain) family protein
Ciclev10008383m		scion to stock	Leaves	DEAD/DEAH box RNA helicase family protein
Ciclev10008387m	stock to scion		Leaves	MATE efflux family protein
Ciclev10008389m	stock to scion		Leaves	embryo defective 2737
Ciclev10008411m	stock to scion	scion to stock	Leaves	cytochrome P450, family 71, subfamily B, polypeptide 36
Ciclev10008419m		scion to stock	Leaves	zinc transporter 4 precursor
Ciclev10008439m		scion to stock	Leaves	Galactosyltransferase family protein
Ciclev10008488m		scion to stock	Leaves	G protein coupled receptor
Ciclev10008543m		scion to stock	Leaves	S-locus lectin protein kinase family protein
Ciclev10008555m	stock to scion		Leaves	Glycosyl hydrolase superfamily protein
Ciclev10008564m	stock to scion		Leaves	glucose-6-phosphate/phosphate translocator 2
Ciclev10008608m		scion to stock	Leaves	nudix hydrolase homolog 20
Ciclev10008615m		scion to stock	Leaves	BSD domain-containing protein
Ciclev10008637m	stock to scion	scion to stock	Leaves
Ciclev10008642m	stock to scion	scion to stock	Leaves	polyubiquitin 10
Ciclev10008649m		scion to stock	Leaves	early nodulin-like protein 1
Ciclev10008657m	stock to scion		Leaves	BREVIS RADIX-like 4
Ciclev10008659m	stock to scion	scion to stock	Leaves	Nucleotide-diphospho-sugar transferase family protein
Ciclev10008671m		scion to stock	Leaves	regulatory protein RecX family protein
Ciclev10008687m		scion to stock	Leaves	Calcium-dependent phosphotriesterase superfamily protein
Ciclev10008710m	stock to scion	scion to stock	Leaves	Nitrilase/cyanide hydratase and apolipoprotein N-acyltransferase family protein
Ciclev10008716m		scion to stock	Leaves	recA DNA recombination family protein
Ciclev10008721m		scion to stock	Leaves	GroES-like zinc-binding alcohol dehydrogenase family protein
Ciclev10008722m		scion to stock	Leaves	homolog of yeast autophagy 18 (ATG18) B
Ciclev10008725m	stock to scion		Leaves	GDSL-like Lipase/Acylhydrolase superfamily protein
Ciclev10008729m		scion to stock	Leaves	Protein phosphatase 2C family protein
Ciclev10008735m		scion to stock	Leaves	Protein of unknown function (DUF300)
Ciclev10008736m	stock to scion	scion to stock	Leaves	COP9-signalosome 5B
Ciclev10008750m		scion to stock	Leaves	Heat shock protein DnaJ, N-terminal with domain of unknown function (DUF1977)
Ciclev10008775m	stock to scion		Leaves
Ciclev10008803m		scion to stock	Leaves	Phospholipid/glycerol acyltransferase family protein
Ciclev10008808m	stock to scion		Leaves	N-MYC downregulated-like 2
Ciclev10008817m		scion to stock	Leaves	Haloacid dehalogenase-like hydrolase (HAD) superfamily protein
Ciclev10008836m		scion to stock	Leaves	WRKY DNA-binding protein 11
Ciclev10008869m		scion to stock	Leaves	Sec14p-like phosphatidylinositol transfer family protein
Ciclev10008870m		scion to stock	Leaves	Protein phosphatase 2C family protein
Ciclev10008874m	stock to scion	scion to stock	Leaves	gibberellin 2-oxidase 8
Ciclev10008907m	stock to scion		Leaves	NAD(P)-linked oxidoreductase superfamily protein
Ciclev10008935m		scion to stock	Leaves	indole-3-acetic acid inducible 29
Ciclev10008953m	stock to scion		Leaves	Protein of unknown function (DUF761)
Ciclev10009004m		scion to stock	Leaves	GATA type zinc finger transcription factor family protein
Ciclev10009025m		scion to stock	Leaves	jasmonate-zim-domain protein 12
Ciclev10009028m	stock to scion		Leaves	RmlC-like cupins superfamily protein
Ciclev10009039m		scion to stock	Leaves	RNA 2\'-phosphotransferase, Tpt1 / KptA family
Ciclev10009041m	stock to scion		Leaves	SPX domain gene 2
Ciclev10009045m		scion to stock	Leaves	Protein of unknown function (DUF1639)
Ciclev10009063m		scion to stock	Leaves	serine acetyltransferase 1;1
Ciclev10009077m		scion to stock	Leaves	RNA-binding KH domain-containing protein
Ciclev10009083m	stock to scion		Leaves	SPX domain gene 2
Ciclev10009097m	stock to scion		Leaves	Calcineurin-like metallo-phosphoesterase superfamily protein
Ciclev10009184m		scion to stock	Leaves	Concanavalin A-like lectin protein kinase family protein
Ciclev10009193m	stock to scion		Leaves	tetraspanin2
Ciclev10009208m		scion to stock	Leaves	alpha/beta-Hydrolases superfamily protein
Ciclev10009223m	stock to scion		Leaves	Concanavalin A-like lectin protein kinase family protein
Ciclev10009272m		scion to stock	Leaves	alfin-like 5
Ciclev10009283m	stock to scion		Leaves	EAP30/Vps36 family protein
Ciclev10009303m		scion to stock	Leaves
Ciclev10009310m		scion to stock	Leaves	Ribosomal protein S5 domain 2-like superfamily protein
Ciclev10009327m		scion to stock	Leaves	DERLIN-1
Ciclev10009328m		scion to stock	Leaves	Late embryogenesis abundant (LEA) hydroxyproline-rich glycoprotein family
Ciclev10009377m	stock to scion		Leaves	Ribosomal protein L6 family
Ciclev10009421m		scion to stock	Leaves	Domain of unknown function (DUF298)
Ciclev10009427m		scion to stock	Leaves	RAN GTPase 3
Ciclev10009428m		scion to stock	Leaves	vesicle-associated membrane protein 713
Ciclev10009440m		scion to stock	Leaves	Peroxisomal membrane 22 kDa (Mpv17/PMP22) family protein
Ciclev10009448m	stock to scion		Leaves	S-adenosyl-L-methionine-dependent methyltransferases superfamily protein
Ciclev10009449m	stock to scion	scion to stock	Leaves	PPPDE putative thiol peptidase family protein
Ciclev10009455m	stock to scion	scion to stock	Leaves
Ciclev10009466m	stock to scion		Leaves	emp24/gp25L/p24 family/GOLD family protein
Ciclev10009478m	stock to scion		Leaves	Translation initiation factor SUI1 family protein
Ciclev10009486m	stock to scion	scion to stock	Leaves	OTU-like cysteine protease family protein
Ciclev10009489m		scion to stock	Leaves	Uncharacterised BCR, YbaB family COG0718
Ciclev10009503m		scion to stock	Leaves
Ciclev10009512m		scion to stock	Leaves	Protein of unknown function (DUF3511)
Ciclev10009515m		scion to stock	Leaves	Protein of unknown function (DUF1000)
Ciclev10009570m	stock to scion		Leaves	Peptidyl-tRNA hydrolase II (PTH2) family protein
Ciclev10009585m	stock to scion		Leaves
Ciclev10009604m	stock to scion		Leaves	cyclin-dependent kinase-activating kinase assembly factor-related / CDK-activating kinase assembly factor-related
Ciclev10009629m		scion to stock	Leaves	Protein of unknown function (DUF1350)
Ciclev10009643m		scion to stock	Leaves	ATPase, F0/V0 complex, subunit C protein
Ciclev10009664m	stock to scion	scion to stock	Leaves	Ribosomal protein L31
Ciclev10009720m		scion to stock	Leaves	Basic-leucine zipper (bZIP) transcription factor family protein
Ciclev10009738m		scion to stock	Leaves	Pollen Ole e 1 allergen and extensin family protein
Ciclev10009752m		scion to stock	Leaves
Ciclev10009761m		scion to stock	Leaves	WRKY DNA-binding protein 50
Ciclev10009798m		scion to stock	Leaves	Ribosomal L28e protein family
Ciclev10009817m	stock to scion	scion to stock	Leaves
Ciclev10009830m	stock to scion		Leaves	copper transporter 5
Ciclev10009862m	stock to scion		Leaves
Ciclev10009878m	stock to scion	scion to stock	Leaves	plant natriuretic peptide A
Ciclev10009887m	stock to scion		Leaves	Cytochrome bd ubiquinol oxidase, 14kDa subunit
Ciclev10009899m		scion to stock	Leaves	Ribosomal protein L7Ae/L30e/S12e/Gadd45 family protein
Ciclev10009913m	stock to scion		Leaves
Ciclev10009919m		scion to stock	Leaves	Mitochondrial ATP synthase subunit G protein
Ciclev10009938m		scion to stock	Leaves	Transmembrane proteins 14C
Ciclev10009953m		scion to stock	Leaves
Ciclev10009964m		scion to stock	Leaves
Ciclev10010008m	stock to scion		Leaves
Ciclev10010026m		scion to stock	Leaves
Ciclev10010065m		scion to stock	Leaves
Ciclev10010075m	stock to scion		Leaves
Ciclev10010087m		scion to stock	Leaves
Ciclev10010094m		scion to stock	Leaves
Ciclev10010113m	stock to scion		Leaves
Ciclev10010157m		scion to stock	Leaves	Protein phosphatase 2C family protein
Ciclev10010159m	stock to scion		Leaves	cyclic nucleotide-gated channel 14
Ciclev10010169m		scion to stock	Leaves	haloacid dehalogenase-like hydrolase family protein
Ciclev10010193m		scion to stock	Leaves	Protein kinase superfamily protein
Ciclev10010261m	stock to scion		Leaves	NB-ARC domain-containing disease resistance protein
Ciclev10010282m	stock to scion		Leaves	S-locus lectin protein kinase family protein
Ciclev10010283m	stock to scion		Leaves	F-box/RNI-like/FBD-like domains-containing protein
Ciclev10010284m		scion to stock	Leaves	S-locus lectin protein kinase family protein
Ciclev10010327m		scion to stock	Leaves	suppressor of npr1-1 constitutive 4
Ciclev10010334m		scion to stock	Leaves	Galactosyltransferase family protein
Ciclev10010416m	stock to scion		Leaves	cycloartenol synthase 1
Ciclev10010418m		scion to stock	Leaves	embryo sac development arrest 14
Ciclev10010467m		scion to stock	Leaves	disease resistance family protein / LRR family protein
Ciclev10010499m	stock to scion		Leaves	pentatricopeptide (PPR) repeat-containing protein / CBS domain-containing protein
Ciclev10010502m		scion to stock	Leaves	Adenosylmethionine decarboxylase family protein
Ciclev10010507m	stock to scion		Leaves	cyclic nucleotide-gated cation channel 4
Ciclev10010522m		scion to stock	Leaves	calmodulin-domain protein kinase 9
Ciclev10010532m	stock to scion		Leaves	receptor kinase 2
Ciclev10010538m	stock to scion		Leaves	Protein of unknown function (DUF1350)
Ciclev10010553m		scion to stock	Leaves	glutathione transferase lambda 2
Ciclev10010607m		scion to stock	Leaves	Acyl-CoA N-acyltransferases (NAT) superfamily protein
Ciclev10010642m	stock to scion		Leaves	Cystathionine beta-synthase (CBS) family protein
Ciclev10010656m	stock to scion		Leaves	S-locus lectin protein kinase family protein
Ciclev10010666m	stock to scion		Leaves	calcium-dependent protein kinase 33
Ciclev10010681m		scion to stock	Leaves	Protein of unknown function (DUF2921)
Ciclev10010688m	stock to scion		Leaves	S-locus lectin protein kinase family protein
Ciclev10010728m		scion to stock	Leaves	Disease resistance protein (CC-NBS-LRR class) family
Ciclev10010761m	stock to scion		Leaves	Protein kinase family protein with leucine-rich repeat domain
Ciclev10010766m	stock to scion		Leaves	receptor serine/threonine kinase, putative
Ciclev10010770m	stock to scion		Leaves	Transducin family protein / WD-40 repeat family protein
Ciclev10010784m		scion to stock	Leaves
Ciclev10010809m	stock to scion	scion to stock	Leaves	Auxin efflux carrier family protein
Ciclev10010811m	stock to scion		Leaves	disease resistance family protein / LRR family protein
Ciclev10010884m	stock to scion		Leaves	Terpenoid cyclases family protein
Ciclev10010889m		scion to stock	Leaves
Ciclev10010902m	stock to scion		Leaves	pleiotropic drug resistance 6
Ciclev10010903m		scion to stock	Leaves	pleiotropic drug resistance 6
Ciclev10010910m		scion to stock	Leaves	DNA LIGASE 6
Ciclev10010911m		scion to stock	Leaves	dicer-like 2
Ciclev10010933m		scion to stock	Leaves	ABC transporter family protein
Ciclev10010941m		scion to stock	Leaves	DegP protease 7
Ciclev10010959m	stock to scion		Leaves	suppressor of abi3-5
Ciclev10010961m	stock to scion		Leaves	RNA helicase family protein
Ciclev10010964m	stock to scion		Leaves	Pentatricopeptide repeat (PPR) superfamily protein
Ciclev10010975m		scion to stock	Leaves	Glycosyl transferase, family 35
Ciclev10010976m		scion to stock	Leaves	RNA binding (RRM/RBD/RNP motifs) family protein
Ciclev10010995m		scion to stock	Leaves	Adaptin family protein
Ciclev10010998m		scion to stock	Leaves	ATP binding;valine-tRNA ligases;aminoacyl-tRNA ligases;nucleotide binding;ATP binding;aminoacyl-tRNA ligases
Ciclev10011016m		scion to stock	Leaves	heteroglycan glucosidase 1
Ciclev10011029m	stock to scion		Leaves	Long-chain fatty alcohol dehydrogenase family protein
Ciclev10011033m	stock to scion		Leaves	LETM1-like protein
Ciclev10011057m	stock to scion		Leaves	receptor like protein 34
Ciclev10011058m	stock to scion		Leaves	AMP deaminase, putative / myoadenylate deaminase, putative
Ciclev10011061m	stock to scion		Leaves	glutamate-ammonia ligases;catalytics;glutamate-ammonia ligases
Ciclev10011063m	stock to scion	scion to stock	Leaves	starch branching enzyme 2.2
Ciclev10011102m	stock to scion		Leaves	Ribonuclease II/R family protein
Ciclev10011124m	stock to scion		Leaves	starch synthase 2
Ciclev10011134m		scion to stock	Leaves	PHE ammonia lyase 1
Ciclev10011156m	stock to scion		Leaves	cullin 1
Ciclev10011167m		scion to stock	Leaves	ABC-2 type transporter family protein
Ciclev10011174m	stock to scion		Leaves	Tetratricopeptide repeat (TPR)-like superfamily protein
Ciclev10011177m		scion to stock	Leaves	Protein kinase superfamily protein
Ciclev10011179m		scion to stock	Leaves	Protein kinase superfamily protein
Ciclev10011187m		scion to stock	Leaves	RNA-binding KH domain-containing protein
Ciclev10011201m		scion to stock	Leaves	BEL1-like homeodomain 1
Ciclev10011213m		scion to stock	Leaves	arginine/serine-rich zinc knuckle-containing protein 33
Ciclev10011219m	stock to scion		Leaves	Wall-associated kinase family protein
Ciclev10011227m		scion to stock	Leaves	FTSH protease 6
Ciclev10011237m		scion to stock	Leaves	S-locus lectin protein kinase family protein
Ciclev10011247m		scion to stock	Leaves	ATP binding microtubule motor family protein
Ciclev10011260m		scion to stock	Leaves	heat shock cognate protein 70-1
Ciclev10011262m	stock to scion		Leaves
Ciclev10011271m		scion to stock	Leaves	phosphoinositide 4-kinase gamma 7
Ciclev10011278m	stock to scion		Leaves
Ciclev10011285m		scion to stock	Leaves	chloroplast signal recognition particle 54 kDa subunit
Ciclev10011288m	stock to scion		Leaves	Leucine-rich repeat protein kinase family protein
Ciclev10011312m	stock to scion		Leaves	cytochrome P450, family 97, subfamily A, polypeptide 3
Ciclev10011319m		scion to stock	Leaves	L-O-methylthreonine resistant 1
Ciclev10011331m		scion to stock	Leaves	ZIP metal ion transporter family
Ciclev10011348m		scion to stock	Leaves	Mitochondrial transcription termination factor family protein
Ciclev10011353m	stock to scion		Leaves	cytochrome P450, family 97, subfamily B, polypeptide 3
Ciclev10011357m	stock to scion		Leaves	N2,N2-dimethylguanosine tRNA methyltransferase
Ciclev10011359m		scion to stock	Leaves	Leucine-rich repeat protein kinase family protein
Ciclev10011372m	stock to scion		Leaves	senescence-associated gene 101
Ciclev10011373m	stock to scion		Leaves	FAD-linked oxidases family protein
Ciclev10011376m		scion to stock	Leaves	RNApolymerase sigma-subunit F
Ciclev10011381m	stock to scion		Leaves	peptide transporter 1
Ciclev10011418m		scion to stock	Leaves	RNA-binding KH domain-containing protein
Ciclev10011425m	stock to scion		Leaves
Ciclev10011440m		scion to stock	Leaves	TBP-associated factor 12
Ciclev10011445m	stock to scion		Leaves	Ankyrin repeat family protein
Ciclev10011447m		scion to stock	Leaves	rotamase FKBP 1
Ciclev10011449m		scion to stock	Leaves	AAA-ATPase 1
Ciclev10011471m		scion to stock	Leaves	calcium-dependent protein kinase 13
Ciclev10011472m		scion to stock	Leaves	Pyruvate kinase family protein
Ciclev10011507m		scion to stock	Leaves	Pentatricopeptide repeat (PPR) superfamily protein
Ciclev10011508m	stock to scion		Leaves	Protein of unknown function (DUF604)
Ciclev10011511m	stock to scion		Leaves	cytochrome P450, family 76, subfamily G, polypeptide 1
Ciclev10011514m		scion to stock	Leaves	phosphate transporter 4;2
Ciclev10011525m		scion to stock	Leaves	aspartic proteinase A1
Ciclev10011531m	stock to scion		Leaves	heat shock transcription factor A3
Ciclev10011555m	stock to scion		Leaves	UDP-glucosyl transferase 73C2
Ciclev10011598m		scion to stock	Leaves	UDP-Glycosyltransferase superfamily protein
Ciclev10011601m		scion to stock	Leaves	UDP-Glycosyltransferase superfamily protein
Ciclev10011607m		scion to stock	Leaves	F-box/RNI-like superfamily protein
Ciclev10011638m	stock to scion		Leaves	Protein kinase superfamily protein
Ciclev10011658m		scion to stock	Leaves	Rhomboid-related intramembrane serine protease family protein
Ciclev10011675m	stock to scion		Leaves	F-box/RNI-like superfamily protein
Ciclev10011680m		scion to stock	Leaves	polypyrimidine tract-binding protein 1
Ciclev10011684m		scion to stock	Leaves	ubiquitin 4
Ciclev10011688m		scion to stock	Leaves
Ciclev10011691m		scion to stock	Leaves	fatty acid desaturase 7
Ciclev10011701m		scion to stock	Leaves	Saccharopine dehydrogenase
Ciclev10011703m		scion to stock	Leaves	FASCICLIN-like arabinogalactan protein 17 precursor
Ciclev10011720m		scion to stock	Leaves	cation exchanger 1
Ciclev10011722m	stock to scion		Leaves	Regulator of chromosome condensation (RCC1) family protein
Ciclev10011745m	stock to scion		Leaves	Major facilitator superfamily protein
Ciclev10011749m	stock to scion		Leaves
Ciclev10011765m		scion to stock	Leaves	Transmembrane amino acid transporter family protein
Ciclev10011766m	stock to scion		Leaves	Bifunctional inhibitor/lipid-transfer protein/seed storage 2S albumin superfamily protein
Ciclev10011787m		scion to stock	Leaves	phenylalanyl-tRNA synthetase class IIc family protein
Ciclev10011792m	stock to scion		Leaves	hydroxyproline-rich glycoprotein family protein
Ciclev10011796m	stock to scion		Leaves	HXXXD-type acyl-transferase family protein
Ciclev10011814m		scion to stock	Leaves	plant adhesion molecule 1
Ciclev10011843m		scion to stock	Leaves	phosphorylethanolamine cytidylyltransferase 1
Ciclev10011855m	stock to scion		Leaves	high cyclic electron flow 1
Ciclev10011865m	stock to scion		Leaves
Ciclev10011873m	stock to scion		Leaves	alpha/beta-Hydrolases superfamily protein
Ciclev10011938m		scion to stock	Leaves	squamosa promoter binding protein-like 9
Ciclev10011939m	stock to scion		Leaves	AAR2 protein family
Ciclev10011940m		scion to stock	Leaves	zinc transporter 1 precursor
Ciclev10011945m		scion to stock	Leaves	RING-H2 group F2A
Ciclev10011950m		scion to stock	Leaves	F-box and associated interaction domains-containing protein
Ciclev10011965m	stock to scion		Leaves	alpha/beta-Hydrolases superfamily protein
Ciclev10011970m	stock to scion		Leaves	Protein kinase superfamily protein
Ciclev10011972m		scion to stock	Leaves	alpha/beta-Hydrolases superfamily protein
Ciclev10011985m	stock to scion	scion to stock	Leaves	UbiA prenyltransferase family protein
Ciclev10012005m	stock to scion		Leaves	Ergosterol biosynthesis ERG4/ERG24 family
Ciclev10012009m	stock to scion		Leaves	decapping 1
Ciclev10012015m		scion to stock	Leaves	dual specificity protein phosphatase-related
Ciclev10012021m		scion to stock	Leaves	2-phosphoglycolate phosphatase 1
Ciclev10012045m		scion to stock	Leaves	Concanavalin A-like lectin family protein
Ciclev10012049m		scion to stock	Leaves	Aldolase superfamily protein
Ciclev10012062m		scion to stock	Leaves	zinc transporter 1 precursor
Ciclev10012089m		scion to stock	Leaves	myb-like HTH transcriptional regulator family protein
Ciclev10012121m	stock to scion		Leaves	Core-2/I-branching beta-1,6-N-acetylglucosaminyltransferase family protein
Ciclev10012127m	stock to scion		Leaves	Cysteine proteinases superfamily protein
Ciclev10012166m		scion to stock	Leaves	NAD(P)-binding Rossmann-fold superfamily protein
Ciclev10012185m	stock to scion		Leaves
Ciclev10012232m		scion to stock	Leaves	nuclear factor Y, subunit A10
Ciclev10012288m		scion to stock	Leaves	Protein of unknown function (DUF1191)
Ciclev10012289m		scion to stock	Leaves	Calcineurin-like metallo-phosphoesterase superfamily protein
Ciclev10012291m		scion to stock	Leaves	ubiquitin 4
Ciclev10012299m	stock to scion		Leaves
Ciclev10012301m		scion to stock	Leaves	SPX (SYG1/Pho81/XPR1) domain-containing protein / zinc finger (C3HC4-type RING finger) protein-related
Ciclev10012313m	stock to scion		Leaves	Zinc finger, C3HC4 type (RING finger) family protein
Ciclev10012322m		scion to stock	Leaves
Ciclev10012331m		scion to stock	Leaves	chloroplast RNA-binding protein 29
Ciclev10012335m	stock to scion		Leaves	SOUL heme-binding family protein
Ciclev10012354m		scion to stock	Leaves	ALWAYS EARLY 4
Ciclev10012381m	stock to scion		Leaves
Ciclev10012415m		scion to stock	Leaves	NAD(P)-binding Rossmann-fold superfamily protein
Ciclev10012433m		scion to stock	Leaves	NAD(P)-binding Rossmann-fold superfamily protein
Ciclev10012445m	stock to scion		Leaves	voltage dependent anion channel 1
Ciclev10012453m	stock to scion		Leaves	BR enhanced expression 3
Ciclev10012469m		scion to stock	Leaves	ubiquitin-conjugating enzyme 22
Ciclev10012490m		scion to stock	Leaves	D111/G-patch domain-containing protein
Ciclev10012496m		scion to stock	Leaves	NAD-dependent epimerase/dehydratase family protein
Ciclev10012508m	stock to scion		Leaves	Ribosomal protein S3Ae
Ciclev10012530m		scion to stock	Leaves	RNA-binding (RRM/RBD/RNP motifs) family protein
Ciclev10012535m		scion to stock	Leaves	NAD(P)-binding Rossmann-fold superfamily protein
Ciclev10012536m		scion to stock	Leaves	NC domain-containing protein-related
Ciclev10012547m		scion to stock	Leaves	nudix hydrolase homolog 27
Ciclev10012583m		scion to stock	Leaves	PYR1-like 4
Ciclev10012590m		scion to stock	Leaves	Pathogenesis-related thaumatin superfamily protein
Ciclev10012601m		scion to stock	Leaves	RING/U-box superfamily protein
Ciclev10012628m	stock to scion		Leaves	small and basic intrinsic protein 2;1
Ciclev10012644m		scion to stock	Leaves	Protein of unknown function, DUF584
Ciclev10012659m		scion to stock	Leaves	Protein of unknown function (DUF567)
Ciclev10012678m		scion to stock	Leaves	Late embryogenesis abundant (LEA) hydroxyproline-rich glycoprotein family
Ciclev10012680m		scion to stock	Leaves
Ciclev10012687m		scion to stock	Leaves	PEBP (phosphatidylethanolamine-binding protein) family protein
Ciclev10012690m		scion to stock	Leaves	plastid movement impaired 2
Ciclev10012693m	stock to scion		Leaves	cystatin B
Ciclev10012718m		scion to stock	Leaves	Pyridoxamine 5\'-phosphate oxidase family protein
Ciclev10012723m		scion to stock	Leaves	pyrophosphorylase 4
Ciclev10012725m		scion to stock	Leaves	Ras-related small GTP-binding family protein
Ciclev10012758m		scion to stock	Leaves	SC35-like splicing factor 33
Ciclev10012766m		scion to stock	Leaves	prenylated RAB acceptor 1.A1
Ciclev10012769m		scion to stock	Leaves	Polyketide cyclase/dehydrase and lipid transport superfamily protein
Ciclev10012795m	stock to scion		Leaves	UDP-Glycosyltransferase superfamily protein
Ciclev10012796m	stock to scion		Leaves	Uncharacterised conserved protein ycf60
Ciclev10012826m		scion to stock	Leaves	Protein of unknown function (DUF565)
Ciclev10012859m		scion to stock	Leaves	WCRKC thioredoxin 1
Ciclev10012897m		scion to stock	Leaves	Chaperone DnaJ-domain superfamily protein
Ciclev10012928m		scion to stock	Leaves	Family of unknown function (DUF662)
Ciclev10012953m		scion to stock	Leaves	lipid transfer protein 1
Ciclev10012967m		scion to stock	Leaves
Ciclev10012994m	stock to scion	scion to stock	Leaves	RNA binding (RRM/RBD/RNP motifs) family protein
Ciclev10012995m	stock to scion	scion to stock	Leaves
Ciclev10013013m		scion to stock	Leaves
Ciclev10013017m	stock to scion		Leaves
Ciclev10013029m		scion to stock	Leaves	calmodulin 5
Ciclev10013053m		scion to stock	Leaves	HSP20-like chaperones superfamily protein
Ciclev10013089m		scion to stock	Leaves	Dihydroneopterin aldolase
Ciclev10013100m	stock to scion		Leaves	Ribosomal protein S16 family protein
Ciclev10013102m		scion to stock	Leaves	Yippee family putative zinc-binding protein
Ciclev10013119m	stock to scion		Leaves	lipid transfer protein 4
Ciclev10013120m	stock to scion	scion to stock	Leaves	Defender against death (DAD family) protein
Ciclev10013125m	stock to scion		Leaves	Tautomerase/MIF superfamily protein
Ciclev10013140m		scion to stock	Leaves
Ciclev10013155m		scion to stock	Leaves
Ciclev10013157m		scion to stock	Leaves	Nucleic acid-binding, OB-fold-like protein
Ciclev10013164m		scion to stock	Leaves	Ribosomal protein L35Ae family protein
Ciclev10013190m		scion to stock	Leaves
Ciclev10013191m		scion to stock	Leaves	Bifunctional inhibitor/lipid-transfer protein/seed storage 2S albumin superfamily protein
Ciclev10013227m	stock to scion		Leaves
Ciclev10013266m	stock to scion		Leaves	MYB-like 102
Ciclev10013297m		scion to stock	Leaves
Ciclev10013312m		scion to stock	Leaves	DNA-binding bromodomain-containing protein
Ciclev10013354m		scion to stock	Leaves	far-red elongated hypocotyl 1
Ciclev10013430m		scion to stock	Leaves	UDP-glucosyl transferase 85A3
Ciclev10013456m		scion to stock	Leaves
Ciclev10013465m		scion to stock	Leaves	Argonaute family protein
Ciclev10013484m		scion to stock	Leaves	Protein of unknown function, DUF647
Ciclev10013532m		scion to stock	Leaves	Eukaryotic protein of unknown function (DUF914)
Ciclev10013551m		scion to stock	Leaves	Mitochondrial transcription termination factor family protein
Ciclev10013582m	stock to scion		Leaves	gamete-expressed 3
Ciclev10013584m	stock to scion		Leaves	S-locus lectin protein kinase family protein
Ciclev10013621m	stock to scion		Leaves	Long-chain fatty alcohol dehydrogenase family protein
Ciclev10013652m	stock to scion	scion to stock	Leaves	Leucine-rich repeat protein kinase family protein
Ciclev10013654m		scion to stock	Leaves	Cam interacting protein 111
Ciclev10013660m	stock to scion		Leaves	ABC2 homolog 12
Ciclev10013722m	stock to scion		Leaves	receptor like protein 12
Ciclev10013732m	stock to scion		Leaves	SAUR-like auxin-responsive protein family
Ciclev10013755m		scion to stock	Leaves	Protein kinase superfamily protein
Ciclev10013795m	stock to scion		Leaves	ubiquitin-specific protease 5
Ciclev10013833m		scion to stock	Leaves	Eukaryotic protein of unknown function (DUF872)
Ciclev10013834m	stock to scion		Leaves	conserved peptide upstream open reading frame 9
Ciclev10013864m		scion to stock	Leaves	MATE efflux family protein
Ciclev10013895m		scion to stock	Leaves	Protein of unknown function (DUF1191)
Ciclev10013906m	stock to scion		Leaves	Lipin family protein
Ciclev10013912m		scion to stock	Leaves	ubiquitin-protein ligases
Ciclev10013918m	stock to scion	scion to stock	Leaves	Protein of unknown function DUF106, transmembrane
Ciclev10013937m		scion to stock	Leaves
Ciclev10013989m	stock to scion	scion to stock	Leaves	NAD(P)-binding Rossmann-fold superfamily protein
Ciclev10014022m		scion to stock	Leaves	Homeodomain-like transcriptional regulator
Ciclev10014029m	stock to scion		Leaves	multidrug resistance-associated protein 2
Ciclev10014054m	stock to scion	scion to stock	Leaves	Nucleoporin, Nup133/Nup155-like
Ciclev10014060m	stock to scion	scion to stock	Leaves	DC1 domain-containing protein
Ciclev10014088m	stock to scion	scion to stock	Leaves	NB-ARC domain-containing disease resistance protein
Ciclev10014108m	stock to scion		Leaves	ATPase E1-E2 type family protein / haloacid dehalogenase-like hydrolase family protein
Ciclev10014119m	stock to scion		Leaves	Protein of unknown function, DUF593
Ciclev10014125m		scion to stock	Leaves	receptor-like kinase in flowers 1
Ciclev10014126m	stock to scion	scion to stock	Leaves	receptor-like kinase in flowers 1
Ciclev10014139m	stock to scion		Leaves	Guanylate-binding family protein
Ciclev10014144m		scion to stock	Leaves	Argonaute family protein
Ciclev10014153m	stock to scion		Leaves	Argonaute family protein
Ciclev10014162m		scion to stock	Leaves
Ciclev10014171m		scion to stock	Leaves	tRNA synthetase class I (I, L, M and V) family protein
Ciclev10014194m		scion to stock	Leaves	phosphate 2
Ciclev10014198m		scion to stock	Leaves	auxin response factor 8
Ciclev10014208m		scion to stock	Leaves	S-locus lectin protein kinase family protein
Ciclev10014213m		scion to stock	Leaves	ubiquitin protein ligase 5
Ciclev10014220m		scion to stock	Leaves	Helicase protein with RING/U-box domain
Ciclev10014221m		scion to stock	Leaves	Tetratricopeptide repeat (TPR)-like superfamily protein
Ciclev10014227m	stock to scion		Leaves	glutamate receptor 2.7
Ciclev10014271m		scion to stock	Leaves	SIT4 phosphatase-associated family protein
Ciclev10014277m	stock to scion	scion to stock	Leaves
Ciclev10014281m	stock to scion		Leaves	S-locus lectin protein kinase family protein
Ciclev10014293m		scion to stock	Leaves	Mitogen activated protein kinase kinase kinase-related
Ciclev10014319m		scion to stock	Leaves	starch synthase 3
Ciclev10014326m	stock to scion		Leaves	embryo defective 3012
Ciclev10014333m		scion to stock	Leaves	Raffinose synthase family protein
Ciclev10014338m		scion to stock	Leaves	K+ uptake transporter 3
Ciclev10014355m		scion to stock	Leaves	Subtilisin-like serine endopeptidase family protein
Ciclev10014371m		scion to stock	Leaves	S-domain-2 5
Ciclev10014379m		scion to stock	Leaves	centromere/kinetochore protein, putative (ZW10)
Ciclev10014380m		scion to stock	Leaves	Prolyl oligopeptidase family protein
Ciclev10014382m		scion to stock	Leaves	sulfite reductase
Ciclev10014388m		scion to stock	Leaves	two-pore channel 1
Ciclev10014398m		scion to stock	Leaves	Y-family DNA polymerase H
Ciclev10014407m	stock to scion		Leaves	Early-responsive to dehydration stress protein (ERD4)
Ciclev10014432m		scion to stock	Leaves	global transcription factor group E4
Ciclev10014445m		scion to stock	Leaves	Pentatricopeptide repeat (PPR-like) superfamily protein
Ciclev10014450m	stock to scion		Leaves	Octicosapeptide/Phox/Bem1p family protein
Ciclev10014464m		scion to stock	Leaves	S-domain-2 5
Ciclev10014467m		scion to stock	Leaves	Plant protein of unknown function (DUF639)
Ciclev10014488m	stock to scion		Leaves	pentatricopeptide (PPR) repeat-containing protein
Ciclev10014496m		scion to stock	Leaves	cysteine-rich RLK (RECEPTOR-like protein kinase) 10
Ciclev10014504m	stock to scion		Leaves	cysteine-rich RLK (RECEPTOR-like protein kinase) 10
Ciclev10014519m	stock to scion		Leaves	Pentatricopeptide repeat (PPR) superfamily protein
Ciclev10014538m	stock to scion		Leaves	sulfate transporter 91
Ciclev10014539m		scion to stock	Leaves	Pentatricopeptide repeat (PPR) superfamily protein
Ciclev10014547m		scion to stock	Leaves	Tetratricopeptide repeat (TPR)-like superfamily protein
Ciclev10014570m		scion to stock	Leaves	flavin-binding, kelch repeat, f box 1
Ciclev10014571m	stock to scion		Leaves
Ciclev10014586m		scion to stock	Leaves	cellulose synthase-like B4
Ciclev10014588m		scion to stock	Leaves	hydroxyproline-rich glycoprotein family protein
Ciclev10014595m		scion to stock	Leaves	Tetratricopeptide repeat (TPR)-like superfamily protein
Ciclev10014605m	stock to scion		Leaves	DNA GYRASE A
Ciclev10014632m		scion to stock	Leaves	terpene synthase 14
Ciclev10014638m		scion to stock	Leaves	D6 protein kinase like 2
Ciclev10014643m		scion to stock	Leaves	peptide transporter 2
Ciclev10014661m	stock to scion		Leaves	P-loop containing nucleoside triphosphate hydrolases superfamily protein
Ciclev10014674m	stock to scion		Leaves	Tetratricopeptide repeat (TPR)-like superfamily protein
Ciclev10014716m	stock to scion		Leaves	F-box/RNI-like superfamily protein
Ciclev10014722m		scion to stock	Leaves	ankyrin repeat family protein
Ciclev10014733m		scion to stock	Leaves	Plant L-ascorbate oxidase
Ciclev10014759m		scion to stock	Leaves	calcium dependent protein kinase 1
Ciclev10014761m		scion to stock	Leaves
Ciclev10014769m		scion to stock	Leaves	dicarboxylate transporter 1
Ciclev10014785m		scion to stock	Leaves	ATP binding cassette protein 1
Ciclev10014788m		scion to stock	Leaves	GRF zinc finger / Zinc knuckle protein
Ciclev10014816m	stock to scion		Leaves	Isocitrate/isopropylmalate dehydrogenase family protein
Ciclev10014823m	stock to scion		Leaves	calcium-dependent protein kinase 21
Ciclev10014826m		scion to stock	Leaves	FAD-binding Berberine family protein
Ciclev10014827m		scion to stock	Leaves	TATA BOX ASSOCIATED FACTOR II 59
Ciclev10014843m	stock to scion		Leaves	Cysteinyl-tRNA synthetase, class Ia family protein
Ciclev10014855m		scion to stock	Leaves	Ankyrin repeat family protein
Ciclev10014858m		scion to stock	Leaves	cytochrome P450, family 706, subfamily A, polypeptide 4
Ciclev10014861m		scion to stock	Leaves	cytochrome P450, family 706, subfamily A, polypeptide 6
Ciclev10014863m	stock to scion	scion to stock	Leaves	cytochrome P450, family 706, subfamily A, polypeptide 4
Ciclev10014864m		scion to stock	Leaves	ENHANCED DOWNY MILDEW 2
Ciclev10014868m		scion to stock	Leaves	receptor serine/threonine kinase, putative
Ciclev10014873m		scion to stock	Leaves	calmodulin-domain protein kinase 7
Ciclev10014878m		scion to stock	Leaves	plastid transcriptionally active 12
Ciclev10014881m	stock to scion		Leaves	NAD kinase 1
Ciclev10014883m	stock to scion		Leaves	Pseudouridine synthase family protein
Ciclev10014886m		scion to stock	Leaves	cytochrome P450, family 94, subfamily D, polypeptide 2
Ciclev10014908m	stock to scion		Leaves	NAD(P)-binding Rossmann-fold superfamily protein
Ciclev10014925m		scion to stock	Leaves	RING/U-box superfamily protein
Ciclev10014930m		scion to stock	Leaves	cytochrome P450, family 96, subfamily A, polypeptide 1
Ciclev10014944m		scion to stock	Leaves	citrate synthase 2
Ciclev10014945m	stock to scion		Leaves	receptor serine/threonine kinase, putative
Ciclev10014959m	stock to scion		Leaves	outer envelope protein of 80 kDa
Ciclev10014968m		scion to stock	Leaves	MATE efflux family protein
Ciclev10014969m	stock to scion		Leaves	B-box type zinc finger protein with CCT domain
Ciclev10014997m		scion to stock	Leaves	N-acetylglucosamine-1-phosphate uridylyltransferase 1
Ciclev10014999m		scion to stock	Leaves	Polynucleotidyl transferase, ribonuclease H-like superfamily protein
Ciclev10015005m		scion to stock	Leaves	Homeodomain-like transcriptional regulator
Ciclev10015022m		scion to stock	Leaves	MATE efflux family protein
Ciclev10015028m		scion to stock	Leaves	O-Glycosyl hydrolases family 17 protein
Ciclev10015055m		scion to stock	Leaves	Pseudouridine synthase family protein
Ciclev10015083m		scion to stock	Leaves	RING 1A
Ciclev10015090m	stock to scion		Leaves	monodehydroascorbate reductase 4
Ciclev10015103m	stock to scion		Leaves	Rubisco methyltransferase family protein
Ciclev10015105m	stock to scion		Leaves	UDP-Glycosyltransferase superfamily protein
Ciclev10015133m		scion to stock	Leaves	ARF-GAP domain 5
Ciclev10015147m	stock to scion		Leaves	Uridine diphosphate glycosyltransferase 74E2
Ciclev10015158m		scion to stock	Leaves	3\'-5\'-exoribonuclease family protein
Ciclev10015162m	stock to scion		Leaves	APS reductase 1
Ciclev10015175m		scion to stock	Leaves	GTP binding
Ciclev10015210m		scion to stock	Leaves	glucose-6-phosphate/phosphate translocator 2
Ciclev10015213m		scion to stock	Leaves	lysine histidine transporter 1
Ciclev10015235m		scion to stock	Leaves	Ca2+ activated outward rectifying K+ channel 6
Ciclev10015249m	stock to scion	scion to stock	Leaves	HXXXD-type acyl-transferase family protein
Ciclev10015254m		scion to stock	Leaves	Esterase/lipase/thioesterase family protein
Ciclev10015269m	stock to scion	scion to stock	Leaves	heat shock transcription factor A1D
Ciclev10015272m		scion to stock	Leaves	CBL-interacting protein kinase 3
Ciclev10015292m	stock to scion		Leaves	Galactose oxidase/kelch repeat superfamily protein
Ciclev10015310m	stock to scion		Leaves
Ciclev10015312m	stock to scion	scion to stock	Leaves
Ciclev10015321m		scion to stock	Leaves	Saccharopine dehydrogenase
Ciclev10015335m	stock to scion		Leaves	Tetratricopeptide repeat (TPR)-like superfamily protein
Ciclev10015345m	stock to scion		Leaves	Proteasome component (PCI) domain protein
Ciclev10015351m		scion to stock	Leaves
Ciclev10015369m		scion to stock	Leaves	Ubiquitin-specific protease family C19-related protein
Ciclev10015371m		scion to stock	Leaves	Tyrosine transaminase family protein
Ciclev10015375m		scion to stock	Leaves	SHAGGY-related protein kinase dZeta
Ciclev10015389m		scion to stock	Leaves	Transducin/WD40 repeat-like superfamily protein
Ciclev10015390m	stock to scion	scion to stock	Leaves
Ciclev10015399m		scion to stock	Leaves	Inositol monophosphatase family protein
Ciclev10015402m	stock to scion		Leaves	Chaperone DnaJ-domain superfamily protein
Ciclev10015416m		scion to stock	Leaves	Glucose-6-phosphate/phosphate translocator-related
Ciclev10015437m		scion to stock	Leaves	basic helix-loop-helix (bHLH) DNA-binding superfamily protein
Ciclev10015461m		scion to stock	Leaves	pentatricopeptide repeat 336
Ciclev10015466m	stock to scion		Leaves	Protein kinase superfamily protein
Ciclev10015471m		scion to stock	Leaves	Prefoldin chaperone subunit family protein
Ciclev10015477m		scion to stock	Leaves	negative regulator of systemic acquired resistance (SNI1)
Ciclev10015488m		scion to stock	Leaves	2-oxoglutarate (2OG) and Fe(II)-dependent oxygenase superfamily protein
Ciclev10015490m		scion to stock	Leaves	alanine:glyoxylate aminotransferase
Ciclev10015498m	stock to scion		Leaves	Aldolase-type TIM barrel family protein
Ciclev10015537m		scion to stock	Leaves	Protein of unknown function (DUF677)
Ciclev10015568m	stock to scion		Leaves	senescence-related gene 3
Ciclev10015574m	stock to scion		Leaves	GDSL-like Lipase/Acylhydrolase superfamily protein
Ciclev10015580m	stock to scion		Leaves	arogenate dehydratase 1
Ciclev10015589m		scion to stock	Leaves	P-loop containing nucleoside triphosphate hydrolases superfamily protein
Ciclev10015595m		scion to stock	Leaves	B-box type zinc finger protein with CCT domain
Ciclev10015602m		scion to stock	Leaves	RNA-binding protein
Ciclev10015605m		scion to stock	Leaves	Protein kinase superfamily protein
Ciclev10015609m	stock to scion		Leaves	toprim domain-containing protein
Ciclev10015638m		scion to stock	Leaves	vacuolar ATP synthase subunit C (VATC) / V-ATPase C subunit / vacuolar proton pump C subunit (DET3)
Ciclev10015651m		scion to stock	Leaves	S-adenosyl-L-methionine-dependent methyltransferases superfamily protein
Ciclev10015663m		scion to stock	Leaves	endonuclease 4
Ciclev10015683m		scion to stock	Leaves	NAD(P)-binding Rossmann-fold superfamily protein
Ciclev10015687m		scion to stock	Leaves	TRICHOME BIREFRINGENCE-LIKE 38
Ciclev10015689m		scion to stock	Leaves	Protein of unknown function DUF455
Ciclev10015713m		scion to stock	Leaves	zinc transporter 1 precursor
Ciclev10015734m		scion to stock	Leaves	S-adenosyl-L-methionine-dependent methyltransferases superfamily protein
Ciclev10015739m	stock to scion		Leaves	strictosidine synthase-like 4
Ciclev10015744m		scion to stock	Leaves	Sec-independent periplasmic protein translocase
Ciclev10015746m		scion to stock	Leaves	translocation protein-related
Ciclev10015755m		scion to stock	Leaves	nucleotide binding protein 35
Ciclev10015784m		scion to stock	Leaves	Surfeit locus 1 cytochrome c oxidase biogenesis protein
Ciclev10015797m		scion to stock	Leaves	PRP38 family protein
Ciclev10015820m		scion to stock	Leaves	DNAJ heat shock family protein
Ciclev10015827m		scion to stock	Leaves
Ciclev10015864m		scion to stock	Leaves	CCT motif family protein
Ciclev10015870m		scion to stock	Leaves	Peroxidase superfamily protein
Ciclev10015880m	stock to scion		Leaves	antitermination NusB domain-containing protein
Ciclev10015912m	stock to scion		Leaves	NAD(P)-binding Rossmann-fold superfamily protein
Ciclev10015950m	stock to scion		Leaves	transferases;folic acid binding
Ciclev10015964m	stock to scion		Leaves	UDP-3-O-acyl N-acetylglycosamine deacetylase family protein
Ciclev10016002m	stock to scion		Leaves	DEGP protease 5
Ciclev10016020m		scion to stock	Leaves	alpha/beta-Hydrolases superfamily protein
Ciclev10016039m	stock to scion		Leaves	syntaxin of plants 131
Ciclev10016047m		scion to stock	Leaves	bZIP protein
Ciclev10016061m	stock to scion		Leaves	DCD (Development and Cell Death) domain protein
Ciclev10016066m		scion to stock	Leaves	Molybdenum cofactor sulfurase family protein
Ciclev10016069m		scion to stock	Leaves	phosphoinositide binding
Ciclev10016074m		scion to stock	Leaves	chlorophyll A/B-binding protein 2
Ciclev10016076m	stock to scion		Leaves	flower-specific, phytochrome-associated protein phosphatase 3
Ciclev10016078m	stock to scion	scion to stock	Leaves
Ciclev10016082m	stock to scion		Leaves	Rhodanese/Cell cycle control phosphatase superfamily protein
Ciclev10016092m		scion to stock	Leaves	KH domain-containing protein / zinc finger (CCCH type) family protein
Ciclev10016105m		scion to stock	Leaves	peroxin 13
Ciclev10016106m		scion to stock	Leaves	Polynucleotidyl transferase, ribonuclease H-like superfamily protein
Ciclev10016134m	stock to scion	scion to stock	Leaves	glyoxalase I homolog
Ciclev10016137m		scion to stock	Leaves	endonuclease 4
Ciclev10016144m		scion to stock	Leaves	Aldolase-type TIM barrel family protein
Ciclev10016176m		scion to stock	Leaves	anthranilate synthase beta subunit 1
Ciclev10016184m		scion to stock	Leaves	NAD(P)-binding Rossmann-fold superfamily protein
Ciclev10016186m	stock to scion	scion to stock	Leaves	5\'-AMP-activated protein kinase beta-2 subunit protein
Ciclev10016190m	stock to scion		Leaves	DNAJ heat shock N-terminal domain-containing protein
Ciclev10016191m		scion to stock	Leaves	RNA-binding (RRM/RBD/RNP motifs) family protein
Ciclev10016196m	stock to scion		Leaves	Bromodomain transcription factor
Ciclev10016228m		scion to stock	Leaves	TRAM, LAG1 and CLN8 (TLC) lipid-sensing domain containing protein
Ciclev10016242m	stock to scion		Leaves	ribonuclease 2
Ciclev10016256m	stock to scion		Leaves	alpha-crystallin domain 32.1
Ciclev10016265m		scion to stock	Leaves	plasmodesmata-located protein 6
Ciclev10016279m		scion to stock	Leaves	NYC1-like
Ciclev10016281m		scion to stock	Leaves	RNA-binding (RRM/RBD/RNP motifs) family protein
Ciclev10016282m		scion to stock	Leaves
Ciclev10016286m		scion to stock	Leaves	chlorophyll A/B-binding protein 2
Ciclev10016287m		scion to stock	Leaves	light-harvesting chlorophyll-protein complex II subunit B1
Ciclev10016299m	stock to scion		Leaves	general regulatory factor 9
Ciclev10016367m	stock to scion		Leaves	Polynucleotidyl transferase, ribonuclease H-like superfamily protein
Ciclev10016392m	stock to scion		Leaves
Ciclev10016417m	stock to scion		Leaves	RING/U-box superfamily protein
Ciclev10016445m	stock to scion		Leaves	Uncharacterised conserved protein UCP022280
Ciclev10016450m	stock to scion		Leaves
Ciclev10016477m	stock to scion		Leaves	homeobox-leucine zipper protein 17
Ciclev10016481m		scion to stock	Leaves	Protein of unknown function (DUF1637)
Ciclev10016485m	stock to scion		Leaves	prohibitin 1
Ciclev10016498m		scion to stock	Leaves	nuclear factor Y, subunit B6
Ciclev10016505m		scion to stock	Leaves	Developmental regulator, ULTRAPETALA
Ciclev10016517m	stock to scion		Leaves	Nuclear transport factor 2 (NTF2) family protein
Ciclev10016520m	stock to scion		Leaves	Pentatricopeptide repeat (PPR) superfamily protein
Ciclev10016529m	stock to scion		Leaves	Drought-responsive family protein
Ciclev10016536m	stock to scion		Leaves	SMAD/FHA domain-containing protein
Ciclev10016561m		scion to stock	Leaves	Got1/Sft2-like vescicle transport protein family
Ciclev10016570m	stock to scion	scion to stock	Leaves
Ciclev10016574m		scion to stock	Leaves	Chaperonin-like RbcX protein
Ciclev10016585m	stock to scion		Leaves	COLD REGULATED 314 INNER MEMBRANE 1
Ciclev10016602m	stock to scion		Leaves
Ciclev10016614m	stock to scion		Leaves	FKBP-like peptidyl-prolyl cis-trans isomerase family protein
Ciclev10016621m	stock to scion		Leaves	DNAJ heat shock family protein
Ciclev10016632m		scion to stock	Leaves	TBP-associated factor 7
Ciclev10016643m		scion to stock	Leaves
Ciclev10016648m		scion to stock	Leaves	B-cell receptor-associated 31-like
Ciclev10016654m		scion to stock	Leaves	Far-red impaired responsive (FAR1) family protein
Ciclev10016664m		scion to stock	Leaves
Ciclev10016673m	stock to scion		Leaves	Acyl-CoA N-acyltransferases (NAT) superfamily protein
Ciclev10016703m		scion to stock	Leaves	YGGT family protein
Ciclev10016720m	stock to scion		Leaves	translocase outer membrane 20-2
Ciclev10016732m		scion to stock	Leaves	Caleosin-related family protein
Ciclev10016754m		scion to stock	Leaves	Uncharacterised protein family (UPF0497)
Ciclev10016768m	stock to scion		Leaves	RNA-binding (RRM/RBD/RNP motifs) family protein
Ciclev10016804m		scion to stock	Leaves	Protein of unknown function (DUF1218)
Ciclev10016835m	stock to scion		Leaves	phloem protein 2 A5
Ciclev10016841m		scion to stock	Leaves	squamosa promoter binding protein-like 4
Ciclev10016847m		scion to stock	Leaves	Protein of unknown function (DUF1068)
Ciclev10016863m		scion to stock	Leaves	plasmodesmata callose-binding protein 5
Ciclev10016875m		scion to stock	Leaves	Ribosomal L5P family protein
Ciclev10016881m		scion to stock	Leaves
Ciclev10016890m		scion to stock	Leaves	F-box family protein
Ciclev10016894m	stock to scion		Leaves	CAX interacting protein 1
Ciclev10016912m		scion to stock	Leaves	NTF2-like
Ciclev10016916m	stock to scion		Leaves
Ciclev10016920m	stock to scion		Leaves	PLANT CADMIUM RESISTANCE 2
Ciclev10016926m		scion to stock	Leaves	Adenine nucleotide alpha hydrolases-like superfamily protein
Ciclev10016971m	stock to scion		Leaves
Ciclev10016974m	stock to scion	scion to stock	Leaves	phloem protein 2-A9
Ciclev10016998m		scion to stock	Leaves	Lactoylglutathione lyase / glyoxalase I family protein
Ciclev10017000m	stock to scion		Leaves
Ciclev10017011m	stock to scion		Leaves	Saccharopine dehydrogenase
Ciclev10017022m		scion to stock	Leaves	Nucleic acid-binding, OB-fold-like protein
Ciclev10017055m	stock to scion		Leaves	MLP-like protein 43
Ciclev10017059m		scion to stock	Leaves	ubiquitin-conjugating enzyme 36
Ciclev10017075m		scion to stock	Leaves
Ciclev10017092m		scion to stock	Leaves	Nucleic acid-binding, OB-fold-like protein
Ciclev10017123m		scion to stock	Leaves
Ciclev10017175m		scion to stock	Leaves	sulfiredoxin
Ciclev10017231m		scion to stock	Leaves	SPT4 homolog 2
Ciclev10017252m		scion to stock	Leaves
Ciclev10017259m		scion to stock	Leaves	Heavy metal transport/detoxification superfamily protein
Ciclev10017265m		scion to stock	Leaves	Glutaredoxin family protein
Ciclev10017272m	stock to scion		Leaves	NAD(P)-linked oxidoreductase superfamily protein
Ciclev10017279m	stock to scion	scion to stock	Leaves
Ciclev10017283m		scion to stock	Leaves	small ubiquitin-like modifier 2
Ciclev10017326m	stock to scion	scion to stock	Leaves
Ciclev10017339m	stock to scion		Leaves
Ciclev10017340m		scion to stock	Leaves	ubiquitin conjugating enzyme 8
Ciclev10017349m	stock to scion		Leaves	Wound-responsive family protein
Ciclev10017395m		scion to stock	Leaves
Ciclev10017400m		scion to stock	Leaves
Ciclev10017422m		scion to stock	Leaves
Ciclev10017424m	stock to scion	scion to stock	Leaves
Ciclev10017434m	stock to scion	scion to stock	Leaves	phosphoglucan, water dikinase
Ciclev10017437m		scion to stock	Leaves	Esterase/lipase/thioesterase family protein
Ciclev10017441m		scion to stock	Leaves	Ubiquitin-specific protease family C19-related protein
Ciclev10017491m		scion to stock	Leaves	Leucine-rich repeat transmembrane protein kinase
Ciclev10017651m		scion to stock	Leaves
Ciclev10017672m		scion to stock	Leaves	phosphoglycerate/bisphosphoglycerate mutase family protein
Ciclev10017699m		scion to stock	Leaves	Endomembrane protein 70 protein family
Ciclev10017747m	stock to scion		Leaves	DEAD/DEAH box RNA helicase family protein
Ciclev10017751m		scion to stock	Leaves	Tetratricopeptide repeat (TPR)-like superfamily protein
Ciclev10017773m	stock to scion		Leaves	cytochrome P450, family 706, subfamily A, polypeptide 4
Ciclev10017794m		scion to stock	Leaves	NB-ARC domain-containing disease resistance protein
Ciclev10017811m		scion to stock	Leaves	shikimate kinase like 1
Ciclev10017814m	stock to scion		Leaves	acyl-activating enzyme 14
Ciclev10017839m		scion to stock	Leaves	Subtilisin-like serine endopeptidase family protein
Ciclev10017848m		scion to stock	Leaves	Histone superfamily protein
Ciclev10017898m		scion to stock	Leaves	Pentatricopeptide repeat (PPR) superfamily protein
Ciclev10017966m		scion to stock	Leaves	Dihydrolipoamide succinyltransferase
Ciclev10018017m		scion to stock	Leaves	chitin elicitor receptor kinase 1
Ciclev10018024m		scion to stock	Leaves	S-locus lectin protein kinase family protein
Ciclev10018031m	stock to scion		Leaves	strictosidine synthase-like 4
Ciclev10018065m	stock to scion		Leaves	Tetratricopeptide repeat (TPR)-like superfamily protein
Ciclev10018112m		scion to stock	Leaves	receptor like protein 19
Ciclev10018190m	stock to scion	scion to stock	Leaves	NB-ARC domain-containing disease resistance protein
Ciclev10018215m		scion to stock	Leaves	Na+/H+ antiporter 6
Ciclev10018227m		scion to stock	Leaves	PRP38 family protein
Ciclev10018263m		scion to stock	Leaves	Protein of unknown function (DUF789)
Ciclev10018269m	stock to scion		Leaves	Tetratricopeptide repeat (TPR)-like superfamily protein
Ciclev10018333m		scion to stock	Leaves	Subtilisin-like serine endopeptidase family protein
Ciclev10018343m		scion to stock	Leaves	2-oxoglutarate (2OG) and Fe(II)-dependent oxygenase superfamily protein
Ciclev10018357m	stock to scion		Leaves	FAD-binding Berberine family protein
Ciclev10018364m		scion to stock	Leaves	Tetratricopeptide repeat (TPR)-like superfamily protein
Ciclev10018407m		scion to stock	Leaves	RAB GTPase homolog A1F
Ciclev10018412m	stock to scion		Leaves	Amino acid permease family protein
Ciclev10018416m		scion to stock	Leaves	OTU-like cysteine protease family protein
Ciclev10018424m	stock to scion		Leaves	pleckstrin homology (PH) domain-containing protein
Ciclev10018427m	stock to scion		Leaves	ataxia-telangiectasia mutated
Ciclev10018441m	stock to scion		Leaves	RNA polymerase II transcription mediators
Ciclev10018492m	stock to scion	scion to stock	Leaves	LRR and NB-ARC domains-containing disease resistance protein
Ciclev10018497m		scion to stock	Leaves	modifier of snc1
Ciclev10018507m	stock to scion	scion to stock	Leaves	LRR and NB-ARC domains-containing disease resistance protein
Ciclev10018512m		scion to stock	Leaves	xylem serine peptidase 1
Ciclev10018514m		scion to stock	Leaves	TBP-associated factor 2
Ciclev10018518m	stock to scion		Leaves	multidrug resistance-associated protein 14
Ciclev10018525m	stock to scion		Leaves	MUTS homolog 6
Ciclev10018528m		scion to stock	Leaves	disease resistance protein (TIR-NBS-LRR class), putative
Ciclev10018532m	stock to scion		Leaves	ATP binding cassette subfamily B4
Ciclev10018535m		scion to stock	Leaves	zinc ion binding
Ciclev10018556m	stock to scion		Leaves	NB-ARC domain-containing disease resistance protein
Ciclev10018586m	stock to scion		Leaves	disease resistance protein (TIR-NBS-LRR class), putative
Ciclev10018596m	stock to scion		Leaves	BCL-2-associated athanogene 6
Ciclev10018603m		scion to stock	Leaves	Leucine-rich repeat protein kinase family protein
Ciclev10018604m	stock to scion		Leaves	Leucine-rich receptor-like protein kinase family protein
Ciclev10018605m	stock to scion		Leaves	Protein phosphatase 2C family protein
Ciclev10018612m	stock to scion		Leaves	Disease resistance protein (TIR-NBS-LRR class) family
Ciclev10018622m	stock to scion	scion to stock	Leaves	nucleotidyltransferases
Ciclev10018632m		scion to stock	Leaves
Ciclev10018657m		scion to stock	Leaves	C2 calcium/lipid-binding and GRAM domain containing protein
Ciclev10018667m		scion to stock	Leaves	Plant protein of unknown function (DUF863)
Ciclev10018677m	stock to scion	scion to stock	Leaves	BTB/POZ domain-containing protein
Ciclev10018688m		scion to stock	Leaves	NB-ARC domain-containing disease resistance protein
Ciclev10018693m	stock to scion		Leaves	Disease resistance protein (TIR-NBS-LRR class) family
Ciclev10018707m	stock to scion		Leaves	disease resistance protein (TIR-NBS-LRR class), putative
Ciclev10018722m	stock to scion	scion to stock	Leaves	Disease resistance protein (TIR-NBS-LRR class) family
Ciclev10018733m		scion to stock	Leaves	RNA binding
Ciclev10018748m		scion to stock	Leaves	trehalose-6-phosphate synthase
Ciclev10018756m	stock to scion	scion to stock	Leaves	aspartate kinase-homoserine dehydrogenase ii
Ciclev10018758m		scion to stock	Leaves	pre-mRNA splicing factor-related
Ciclev10018760m	stock to scion		Leaves	ARM repeat superfamily protein
Ciclev10018763m	stock to scion		Leaves	RNA-metabolising metallo-beta-lactamase family protein
Ciclev10018801m		scion to stock	Leaves	RELA/SPOT homolog 1
Ciclev10018819m	stock to scion		Leaves	heavy metal atpase 5
Ciclev10018822m	stock to scion		Leaves	stachyose synthase
Ciclev10018826m	stock to scion		Leaves	AAA-type ATPase family protein
Ciclev10018840m	stock to scion	scion to stock	Leaves	DNA mismatch repair protein MutS, type 2
Ciclev10018849m	stock to scion		Leaves	SET domain-containing protein
Ciclev10018851m	stock to scion		Leaves	transmembrane protein-related
Ciclev10018883m		scion to stock	Leaves	alpha-N-acetylglucosaminidase family / NAGLU family
Ciclev10018896m		scion to stock	Leaves	SET-domain containing protein lysine methyltransferase family protein
Ciclev10018901m	stock to scion		Leaves	receptor-like protein kinase 1
Ciclev10018903m	stock to scion		Leaves	cation/H+ exchanger 18
Ciclev10018906m	stock to scion		Leaves	receptor-like protein kinase 1
Ciclev10018908m		scion to stock	Leaves	Leucine-rich repeat transmembrane protein kinase
Ciclev10018916m		scion to stock	Leaves	GRAS family transcription factor
Ciclev10018920m	stock to scion		Leaves	MUTS-like protein 4
Ciclev10018921m	stock to scion	scion to stock	Leaves	Cobalamin-independent synthase family protein
Ciclev10018948m	stock to scion		Leaves	cyclic nucleotide-binding transporter 1
Ciclev10018965m		scion to stock	Leaves	Cobalamin-independent synthase family protein
Ciclev10018971m	stock to scion		Leaves	oligopeptide transporter 7
Ciclev10018975m		scion to stock	Leaves	RAD3-like DNA-binding helicase protein
Ciclev10018990m	stock to scion		Leaves	ataxia-telangiectasia mutated
Ciclev10018991m		scion to stock	Leaves	Transketolase
Ciclev10019014m	stock to scion		Leaves	no pollen germination related 2
Ciclev10019028m	stock to scion		Leaves	Prolyl oligopeptidase family protein
Ciclev10019053m	stock to scion	scion to stock	Leaves	ferric reduction oxidase 2
Ciclev10019060m		scion to stock	Leaves	HCO3- transporter family
Ciclev10019071m		scion to stock	Leaves	Protein kinase superfamily protein
Ciclev10019080m		scion to stock	Leaves	white-brown complex homolog protein 11
Ciclev10019090m		scion to stock	Leaves	Protein kinase family protein
Ciclev10019092m	stock to scion	scion to stock	Leaves	DNAJ heat shock N-terminal domain-containing protein
Ciclev10019095m	stock to scion		Leaves	heat shock protein 90.1
Ciclev10019111m		scion to stock	Leaves	Mitochondrial substrate carrier family protein
Ciclev10019134m	stock to scion		Leaves	Glycosyl hydrolases family 32 protein
Ciclev10019142m	stock to scion		Leaves	disease resistance protein (TIR-NBS-LRR class), putative
Ciclev10019144m		scion to stock	Leaves	Sec23/Sec24 protein transport family protein
Ciclev10019174m	stock to scion		Leaves	auxin response factor 18
Ciclev10019203m		scion to stock	Leaves	cationic amino acid transporter 2
Ciclev10019205m	stock to scion		Leaves	AMP-dependent synthetase and ligase family protein
Ciclev10019208m		scion to stock	Leaves	Ankyrin repeat family protein
Ciclev10019242m	stock to scion		Leaves	polyribonucleotide nucleotidyltransferase, putative
Ciclev10019260m	stock to scion		Leaves
Ciclev10019265m	stock to scion		Leaves	Fatty acid hydroxylase superfamily
Ciclev10019318m		scion to stock	Leaves	KU70 homolog
Ciclev10019319m		scion to stock	Leaves	Major facilitator superfamily protein
Ciclev10019321m	stock to scion	scion to stock	Leaves	Cyclin/Brf1-like TBP-binding protein
Ciclev10019323m		scion to stock	Leaves	DYNAMIN-like 1E
Ciclev10019333m	stock to scion		Leaves	Pyridoxal phosphate (PLP)-dependent transferases superfamily protein
Ciclev10019351m		scion to stock	Leaves	NIMA-related kinase 2
Ciclev10019379m		scion to stock	Leaves	Leucine-rich repeat protein kinase family protein
Ciclev10019381m	stock to scion		Leaves	Guanylate-binding family protein
Ciclev10019410m		scion to stock	Leaves	Cupredoxin superfamily protein
Ciclev10019423m	stock to scion		Leaves	C2 domain-containing protein / GRAM domain-containing protein
Ciclev10019426m		scion to stock	Leaves	Major facilitator superfamily protein
Ciclev10019439m	stock to scion	scion to stock	Leaves	calcineurin B subunit-related
Ciclev10019480m		scion to stock	Leaves	CLP protease regulatory subunit X
Ciclev10019481m		scion to stock	Leaves	SET domain-containing protein
Ciclev10019492m	stock to scion		Leaves	Tetratricopeptide repeat (TPR)-like superfamily protein
Ciclev10019496m		scion to stock	Leaves	Alg9-like mannosyltransferase family
Ciclev10019527m		scion to stock	Leaves	histone acetyltransferase of the GNAT family 1
Ciclev10019533m		scion to stock	Leaves	NAC domain containing protein 2
Ciclev10019534m		scion to stock	Leaves	CCT motif -containing response regulator protein
Ciclev10019555m		scion to stock	Leaves	Chaperone DnaJ-domain superfamily protein
Ciclev10019560m		scion to stock	Leaves	Poly (ADP-ribose) glycohydrolase (PARG)
Ciclev10019567m	stock to scion		Leaves	glutathione reductase
Ciclev10019577m	stock to scion		Leaves	F-box/RNI-like superfamily protein
Ciclev10019588m		scion to stock	Leaves	T-complex protein 1 alpha subunit
Ciclev10019600m	stock to scion		Leaves	magnesium/proton exchanger
Ciclev10019609m		scion to stock	Leaves
Ciclev10019615m		scion to stock	Leaves	electron-transfer flavoprotein:ubiquinone oxidoreductase
Ciclev10019627m	stock to scion		Leaves	phosphate transporter 1;4
Ciclev10019630m		scion to stock	Leaves	Calcium-binding EF-hand family protein
Ciclev10019636m		scion to stock	Leaves	ATP-dependent caseinolytic (Clp) protease/crotonase family protein
Ciclev10019637m		scion to stock	Leaves	Cytochrome P450 superfamily protein
Ciclev10019644m		scion to stock	Leaves	flowering time control protein-related / FCA gamma-related
Ciclev10019651m	stock to scion	scion to stock	Leaves	cytochrome P450, family 76, subfamily C, polypeptide 4
Ciclev10019666m		scion to stock	Leaves	alpha/beta-Hydrolases superfamily protein
Ciclev10019696m		scion to stock	Leaves	glutamate-cysteine ligase
Ciclev10019729m		scion to stock	Leaves
Ciclev10019731m		scion to stock	Leaves	cytochrome P450, family 72, subfamily A, polypeptide 15
Ciclev10019745m	stock to scion		Leaves	nitrate transporter 1:2
Ciclev10019770m		scion to stock	Leaves	UDP-glucosyl transferase 78D2
Ciclev10019791m		scion to stock	Leaves	Major facilitator superfamily protein
Ciclev10019792m	stock to scion		Leaves	F-box/RNI-like/FBD-like domains-containing protein
Ciclev10019794m		scion to stock	Leaves	Exostosin family protein
Ciclev10019811m		scion to stock	Leaves	cytochrome P450, family 93, subfamily D, polypeptide 1
Ciclev10019821m	stock to scion	scion to stock	Leaves	Protein phosphatase 2A, regulatory subunit PR55
Ciclev10019823m	stock to scion	scion to stock	Leaves	Tetratricopeptide repeat (TPR)-like superfamily protein
Ciclev10019829m	stock to scion		Leaves	Tetratricopeptide repeat (TPR)-like superfamily protein
Ciclev10019830m	stock to scion	scion to stock	Leaves	transducin family protein / WD-40 repeat family protein
Ciclev10019843m		scion to stock	Leaves	homolog of asparagine-linked glycosylation 12
Ciclev10019848m		scion to stock	Leaves	Eukaryotic aspartyl protease family protein
Ciclev10019887m		scion to stock	Leaves	Integrin-linked protein kinase family
Ciclev10019901m	stock to scion		Leaves	AAA-type ATPase family protein
Ciclev10019913m		scion to stock	Leaves	Protein kinase superfamily protein
Ciclev10019923m		scion to stock	Leaves	Major facilitator superfamily protein
Ciclev10019942m		scion to stock	Leaves	RNA-binding (RRM/RBD/RNP motifs) family protein
Ciclev10019944m	stock to scion		Leaves	Major facilitator superfamily protein
Ciclev10019956m		scion to stock	Leaves	phosphate starvation response 1
Ciclev10019957m		scion to stock	Leaves
Ciclev10020003m		scion to stock	Leaves	TRICHOME BIREFRINGENCE-LIKE 11
Ciclev10020013m		scion to stock	Leaves	Tetratricopeptide repeat (TPR)-like superfamily protein
Ciclev10020015m		scion to stock	Leaves	zinc finger (C3HC4-type RING finger) family protein
Ciclev10020018m	stock to scion		Leaves
Ciclev10020030m		scion to stock	Leaves	GTP cyclohydrolase I
Ciclev10020031m		scion to stock	Leaves	ROP-interactive CRIB motif-containing protein 7
Ciclev10020038m		scion to stock	Leaves	Nuclear transport factor 2 (NTF2) family protein with RNA binding (RRM-RBD-RNP motifs) domain
Ciclev10020042m		scion to stock	Leaves	hydroxymethylglutaryl-CoA synthase / HMG-CoA synthase / 3-hydroxy-3-methylglutaryl coenzyme A synthase
Ciclev10020067m	stock to scion		Leaves	RNA-binding (RRM/RBD/RNP motifs) family protein
Ciclev10020072m		scion to stock	Leaves	GRAS family transcription factor
Ciclev10020092m		scion to stock	Leaves	UDP-glucosyltransferase 74F2
Ciclev10020100m		scion to stock	Leaves
Ciclev10020104m	stock to scion		Leaves	Transmembrane amino acid transporter family protein
Ciclev10020136m	stock to scion		Leaves	methionine gamma-lyase
Ciclev10020150m		scion to stock	Leaves	proline transporter 1
Ciclev10020154m	stock to scion		Leaves	UDP-Glycosyltransferase superfamily protein
Ciclev10020155m	stock to scion		Leaves	tetratricopeptide repeat (TPR)-containing protein
Ciclev10020162m		scion to stock	Leaves	Pectin lyase-like superfamily protein
Ciclev10020168m		scion to stock	Leaves	CBL-interacting protein kinase 9
Ciclev10020172m		scion to stock	Leaves	Rhodanese/Cell cycle control phosphatase superfamily protein
Ciclev10020174m		scion to stock	Leaves	alpha/beta-Hydrolases superfamily protein
Ciclev10020187m		scion to stock	Leaves	UDP-D-glucuronate 4-epimerase 3
Ciclev10020203m	stock to scion		Leaves	P-loop containing nucleoside triphosphate hydrolases superfamily protein
Ciclev10020215m		scion to stock	Leaves	BTB-POZ and MATH domain 4
Ciclev10020216m	stock to scion		Leaves	Glycine cleavage T-protein family
Ciclev10020242m		scion to stock	Leaves	Acyl-CoA thioesterase family protein
Ciclev10020293m	stock to scion		Leaves	Protein prenylyltransferase superfamily protein
Ciclev10020349m		scion to stock	Leaves	Protein of unknown function (DUF3754)
Ciclev10020377m		scion to stock	Leaves	O-methyltransferase 1
Ciclev10020382m		scion to stock	Leaves	RING/U-box superfamily protein
Ciclev10020398m		scion to stock	Leaves	root hair initiation protein root hairless 1 (RHL1)
Ciclev10020415m	stock to scion		Leaves	alpha/beta-Hydrolases superfamily protein
Ciclev10020438m		scion to stock	Leaves	Core-2/I-branching beta-1,6-N-acetylglucosaminyltransferase family protein
Ciclev10020467m	stock to scion		Leaves	translation elongation factor Ts (EF-Ts), putative
Ciclev10020473m		scion to stock	Leaves	methionine aminopeptidase 1A
Ciclev10020494m		scion to stock	Leaves	Flavin-containing monooxygenase family protein
Ciclev10020503m		scion to stock	Leaves	Flavin-binding monooxygenase family protein
Ciclev10020507m		scion to stock	Leaves	Protein kinase superfamily protein
Ciclev10020519m	stock to scion		Leaves	O-acetylserine (thiol) lyase B
Ciclev10020539m		scion to stock	Leaves	NDH-dependent cyclic electron flow 5
Ciclev10020542m		scion to stock	Leaves	thylakoid-associated phosphatase 38
Ciclev10020545m	stock to scion		Leaves	B-box type zinc finger protein with CCT domain
Ciclev10020574m	stock to scion		Leaves	alpha/beta-Hydrolases superfamily protein
Ciclev10020582m	stock to scion		Leaves	ribosomal protein L5
Ciclev10020604m		scion to stock	Leaves	ATP-dependent caseinolytic (Clp) protease/crotonase family protein
Ciclev10020613m		scion to stock	Leaves	NAD(P)-binding Rossmann-fold superfamily protein
Ciclev10020615m		scion to stock	Leaves	purine permease 11
Ciclev10020621m		scion to stock	Leaves	AT hook motif DNA-binding family protein
Ciclev10020622m		scion to stock	Leaves	Pre-mRNA cleavage complex II protein family
Ciclev10020672m		scion to stock	Leaves	Leucine-rich repeat transmembrane protein kinase
Ciclev10020676m		scion to stock	Leaves	alpha/beta-Hydrolases superfamily protein
Ciclev10020691m		scion to stock	Leaves	fatA acyl-ACP thioesterase
Ciclev10020702m		scion to stock	Leaves	shrunken seed protein (SSE1)
Ciclev10020704m		scion to stock	Leaves	Plant protein 1589 of unknown function
Ciclev10020753m	stock to scion	scion to stock	Leaves	acyl-CoA binding protein 2
Ciclev10020756m		scion to stock	Leaves	TMPIT-like protein
Ciclev10020813m	stock to scion		Leaves	DNA glycosylase superfamily protein
Ciclev10020814m	stock to scion		Leaves	O-methyltransferase 1
Ciclev10020820m		scion to stock	Leaves	O-methyltransferase 1
Ciclev10020828m		scion to stock	Leaves	O-methyltransferase 1
Ciclev10020835m		scion to stock	Leaves	formyltetrahydrofolate deformylase, putative
Ciclev10020838m		scion to stock	Leaves	senescence-related gene 1
Ciclev10020850m		scion to stock	Leaves	Protein of unknown function (DUF506)
Ciclev10020852m		scion to stock	Leaves	shaggy-related kinase 11
Ciclev10020853m		scion to stock	Leaves
Ciclev10020879m	stock to scion	scion to stock	Leaves	protein serine/threonine kinases;ATP binding;catalytics
Ciclev10020919m	stock to scion		Leaves	UDP-D-glucose/UDP-D-galactose 4-epimerase 5
Ciclev10020957m		scion to stock	Leaves	E3 Ubiquitin ligase family protein
Ciclev10020964m		scion to stock	Leaves	Phosphotyrosine protein phosphatases superfamily protein
Ciclev10020974m	stock to scion		Leaves	FKBP12 interacting protein 37
Ciclev10020988m	stock to scion		Leaves	AT hook motif DNA-binding family protein
Ciclev10020990m		scion to stock	Leaves	NAD(P)-binding Rossmann-fold superfamily protein
Ciclev10021011m		scion to stock	Leaves
Ciclev10021013m		scion to stock	Leaves	Thioredoxin family protein
Ciclev10021020m		scion to stock	Leaves	Uroporphyrinogen decarboxylase
Ciclev10021039m	stock to scion		Leaves	Protein of unknown function (DUF789)
Ciclev10021041m	stock to scion		Leaves	NAD(P)-binding Rossmann-fold superfamily protein
Ciclev10021070m		scion to stock	Leaves	P-loop containing nucleoside triphosphate hydrolases superfamily protein
Ciclev10021072m		scion to stock	Leaves	Oxidoreductase, zinc-binding dehydrogenase family protein
Ciclev10021079m		scion to stock	Leaves	NAD(P)-binding Rossmann-fold superfamily protein
Ciclev10021083m		scion to stock	Leaves	NAD(P)-binding Rossmann-fold superfamily protein
Ciclev10021105m	stock to scion		Leaves	pfkB-like carbohydrate kinase family protein
Ciclev10021110m		scion to stock	Leaves	transthyretin-like protein
Ciclev10021113m		scion to stock	Leaves	Protein kinase superfamily protein
Ciclev10021117m		scion to stock	Leaves	NAC domain containing protein 1
Ciclev10021127m	stock to scion		Leaves	PGR5-LIKE A
Ciclev10021165m	stock to scion		Leaves	Zinc finger (CCCH-type/C3HC4-type RING finger) family protein
Ciclev10021186m		scion to stock	Leaves	Protein of unknown function (DUF3049)
Ciclev10021188m		scion to stock	Leaves	Sterile alpha motif (SAM) domain-containing protein
Ciclev10021192m		scion to stock	Leaves	type one serine/threonine protein phosphatase 3
Ciclev10021210m		scion to stock	Leaves	Class I glutamine amidotransferase-like superfamily protein
Ciclev10021217m	stock to scion		Leaves	ARM repeat superfamily protein
Ciclev10021219m		scion to stock	Leaves	PLC-like phosphodiesterases superfamily protein
Ciclev10021257m		scion to stock	Leaves	P-loop containing nucleoside triphosphate hydrolases superfamily protein
Ciclev10021259m		scion to stock	Leaves
Ciclev10021273m	stock to scion		Leaves	endoplasmic reticulum-adenine nucleotide transporter 1
Ciclev10021279m	stock to scion		Leaves	thiamin pyrophosphokinase1
Ciclev10021302m		scion to stock	Leaves	DHHC-type zinc finger family protein
Ciclev10021319m		scion to stock	Leaves	KNOTTED-like homeobox of Arabidopsis thaliana 7
Ciclev10021379m	stock to scion	scion to stock	Leaves	Erythronate-4-phosphate dehydrogenase family protein
Ciclev10021382m	stock to scion		Leaves
Ciclev10021384m	stock to scion		Leaves	Primosome PriB/single-strand DNA-binding
Ciclev10021386m	stock to scion		Leaves	Rieske (2Fe-2S) domain-containing protein
Ciclev10021389m	stock to scion		Leaves	Kinase interacting (KIP1-like) family protein
Ciclev10021413m		scion to stock	Leaves	alpha/beta-Hydrolases superfamily protein
Ciclev10021427m		scion to stock	Leaves	Rhodanese/Cell cycle control phosphatase superfamily protein
Ciclev10021441m	stock to scion	scion to stock	Leaves	SNARE associated Golgi protein family
Ciclev10021442m	stock to scion		Leaves	methyl esterase 17
Ciclev10021447m	stock to scion		Leaves	Tetraspanin family protein
Ciclev10021474m	stock to scion	scion to stock	Leaves	Polynucleotidyl transferase, ribonuclease H-like superfamily protein
Ciclev10021478m		scion to stock	Leaves	Ubiquitin-specific protease family C19-related protein
Ciclev10021526m	stock to scion		Leaves
Ciclev10021529m		scion to stock	Leaves	casein kinase II beta chain 1
Ciclev10021533m	stock to scion		Leaves	Transcription initiation factor TFIIE, beta subunit
Ciclev10021537m	stock to scion		Leaves
Ciclev10021576m		scion to stock	Leaves	Protein of unknown function (DUF761)
Ciclev10021617m		scion to stock	Leaves	tetratricopeptide repeat (TPR)-containing protein
Ciclev10021635m	stock to scion		Leaves
Ciclev10021643m		scion to stock	Leaves	alpha/beta-Hydrolases superfamily protein
Ciclev10021692m		scion to stock	Leaves
Ciclev10021704m		scion to stock	Leaves	alpha/beta-Hydrolases superfamily protein
Ciclev10021706m		scion to stock	Leaves	alpha/beta-Hydrolases superfamily protein
Ciclev10021714m	stock to scion		Leaves	Nodulin MtN3 family protein
Ciclev10021749m	stock to scion	scion to stock	Leaves	Leucine-rich repeat (LRR) family protein
Ciclev10021762m		scion to stock	Leaves	Sec14p-like phosphatidylinositol transfer family protein
Ciclev10021781m	stock to scion		Leaves	SPX domain gene 3
Ciclev10021801m	stock to scion	scion to stock	Leaves	VIRB2-interacting protein 2
Ciclev10021811m	stock to scion		Leaves	NADH-ubiquinone oxidoreductase 24 kDa subunit, putative
Ciclev10021817m	stock to scion	scion to stock	Leaves	Acyl-CoA N-acyltransferases (NAT) superfamily protein
Ciclev10021831m		scion to stock	Leaves	glutathione S-transferase THETA 1
Ciclev10021832m	stock to scion		Leaves
Ciclev10021850m		scion to stock	Leaves	Protein of unknown function (DUF3755)
Ciclev10021862m	stock to scion	scion to stock	Leaves	Dof-type zinc finger DNA-binding family protein
Ciclev10021868m		scion to stock	Leaves	Chlorophyll A-B binding family protein
Ciclev10021879m	stock to scion		Leaves	glutathione S-transferase THETA 1
Ciclev10021886m		scion to stock	Leaves	Far-red impaired responsive (FAR1) family protein
Ciclev10021922m		scion to stock	Leaves	tubulin folding cofactor B
Ciclev10021936m		scion to stock	Leaves	Bax inhibitor-1 family protein
Ciclev10021974m		scion to stock	Leaves	Uncharacterized conserved protein (DUF2358)
Ciclev10021981m		scion to stock	Leaves	Class I glutamine amidotransferase-like superfamily protein
Ciclev10021986m		scion to stock	Leaves	PNAS-3 related
Ciclev10021988m		scion to stock	Leaves	Plant VAMP (vesicle-associated membrane protein) family protein
Ciclev10022001m	stock to scion		Leaves	Kunitz family trypsin and protease inhibitor protein
Ciclev10022008m		scion to stock	Leaves	nucleotide binding;nucleic acid binding
Ciclev10022024m		scion to stock	Leaves	heat shock protein 21
Ciclev10022030m	stock to scion		Leaves	glutathione S-transferase (class zeta) 2
Ciclev10022037m	stock to scion		Leaves	Arv1-like protein
Ciclev10022041m	stock to scion		Leaves	Kunitz family trypsin and protease inhibitor protein
Ciclev10022043m	stock to scion		Leaves	Class I glutamine amidotransferase-like superfamily protein
Ciclev10022050m	stock to scion		Leaves	homolog of carrot EP3-3 chitinase
Ciclev10022056m	stock to scion		Leaves
Ciclev10022100m		scion to stock	Leaves	osmotin 34
Ciclev10022130m	stock to scion		Leaves	glutathione peroxidase 6
Ciclev10022132m		scion to stock	Leaves	Putative thiol-disulphide oxidoreductase DCC
Ciclev10022137m	stock to scion		Leaves	P-loop containing nucleoside triphosphate hydrolases superfamily protein
Ciclev10022151m		scion to stock	Leaves	novel cap-binding protein
Ciclev10022184m		scion to stock	Leaves	Acyl-CoA N-acyltransferases (NAT) superfamily protein
Ciclev10022200m		scion to stock	Leaves	endoxyloglucan transferase A3
Ciclev10022213m		scion to stock	Leaves	RING/U-box superfamily protein
Ciclev10022222m		scion to stock	Leaves	PATATIN-like protein 5
Ciclev10022229m	stock to scion		Leaves	HAL3-like protein A
Ciclev10022245m		scion to stock	Leaves	RAC-like 10
Ciclev10022249m		scion to stock	Leaves	Far-red impaired responsive (FAR1) family protein
Ciclev10022257m	stock to scion		Leaves
Ciclev10022260m	stock to scion		Leaves	Bifunctional inhibitor/lipid-transfer protein/seed storage 2S albumin superfamily protein
Ciclev10022263m	stock to scion		Leaves	RING/U-box superfamily protein
Ciclev10022286m		scion to stock	Leaves	Remorin family protein
Ciclev10022293m		scion to stock	Leaves	glutathione peroxidase 2
Ciclev10022306m		scion to stock	Leaves	Pleckstrin homology (PH) domain-containing protein
Ciclev10022307m		scion to stock	Leaves
Ciclev10022320m		scion to stock	Leaves	RING-H2 finger B1A
Ciclev10022339m	stock to scion		Leaves	IQ-domain 13
Ciclev10022360m		scion to stock	Leaves	Peptidase S24/S26A/S26B/S26C family protein
Ciclev10022387m	stock to scion		Leaves
Ciclev10022394m		scion to stock	Leaves	anaphase promoting complex 10
Ciclev10022422m	stock to scion		Leaves	photosystem II BY
Ciclev10022441m	stock to scion		Leaves	Mediator complex, subunit Med10
Ciclev10022455m	stock to scion		Leaves
Ciclev10022463m	stock to scion	scion to stock	Leaves	ubiquitin-conjugating enzyme 5
Ciclev10022473m		scion to stock	Leaves	cytochrome P450, family 71, subfamily B, polypeptide 37
Ciclev10022484m	stock to scion		Leaves	Peptidase S24/S26A/S26B/S26C family protein
Ciclev10022507m		scion to stock	Leaves	Ribosomal protein S21 family protein
Ciclev10022512m	stock to scion		Leaves	2-oxoglutarate (2OG) and Fe(II)-dependent oxygenase superfamily protein
Ciclev10022530m		scion to stock	Leaves	Glutaredoxin family protein
Ciclev10022571m	stock to scion		Leaves	photosystem I P subunit
Ciclev10022588m	stock to scion	scion to stock	Leaves
Ciclev10022632m		scion to stock	Leaves
Ciclev10022634m		scion to stock	Leaves
Ciclev10022641m		scion to stock	Leaves	nuclear factor Y, subunit B13
Ciclev10022665m		scion to stock	Leaves
Ciclev10022669m	stock to scion		Leaves	ubiquiting-conjugating enzyme 2
Ciclev10022675m	stock to scion	scion to stock	Leaves	ubiquiting-conjugating enzyme 2
Ciclev10022710m		scion to stock	Leaves	ubiquitin conjugating enzyme 8
Ciclev10022728m	stock to scion		Leaves	Ribosomal protein S19e family protein
Ciclev10022741m		scion to stock	Leaves	basic helix-loop-helix (bHLH) DNA-binding superfamily protein
Ciclev10022754m		scion to stock	Leaves
Ciclev10022767m	stock to scion		Leaves	Plastid-lipid associated protein PAP / fibrillin family protein
Ciclev10022785m	stock to scion	scion to stock	Leaves	Small nuclear ribonucleoprotein family protein
Ciclev10022792m	stock to scion		Leaves	60S acidic ribosomal protein family
Ciclev10022793m	stock to scion		Leaves	photosystem II subunit R
Ciclev10022825m	stock to scion		Leaves	Bifunctional inhibitor/lipid-transfer protein/seed storage 2S albumin superfamily protein
Ciclev10022847m	stock to scion		Leaves	Ribosomal protein L24e family protein
Ciclev10022867m	stock to scion		Leaves
Ciclev10022897m		scion to stock	Leaves	Thioredoxin superfamily protein
Ciclev10022898m		scion to stock	Leaves	Zinc-binding ribosomal protein family protein
Ciclev10022909m		scion to stock	Leaves	Serine protease inhibitor, potato inhibitor I-type family protein
Ciclev10022930m		scion to stock	Leaves
Ciclev10022934m	stock to scion		Leaves	Small nuclear ribonucleoprotein family protein
Ciclev10022935m		scion to stock	Leaves	Ubiquitin domain-containing protein
Ciclev10022961m		scion to stock	Leaves	Ribosomal protein L36e family protein
Ciclev10023009m	stock to scion		Leaves	Signal recognition particle, SRP9/SRP14 subunit
Ciclev10023040m		scion to stock	Leaves
Ciclev10023057m	stock to scion		Leaves
Ciclev10023059m	stock to scion	scion to stock	Leaves	Small nuclear ribonucleoprotein family protein
Ciclev10023074m	stock to scion		Leaves
Ciclev10023104m		scion to stock	Leaves
Ciclev10023124m		scion to stock	Leaves
Ciclev10023147m		scion to stock	Leaves
Ciclev10023211m		scion to stock	Leaves
Ciclev10023252m		scion to stock	Leaves
Ciclev10023258m		scion to stock	Leaves	Disease resistance protein (TIR-NBS-LRR class) family
Ciclev10023260m	stock to scion		Leaves	LRR and NB-ARC domains-containing disease resistance protein
Ciclev10023271m		scion to stock	Leaves	trehalase 1
Ciclev10023283m		scion to stock	Leaves	disease resistance protein (TIR-NBS-LRR class), putative
Ciclev10023318m		scion to stock	Leaves	Cupredoxin superfamily protein
Ciclev10023333m		scion to stock	Leaves	HOPZ-ACTIVATED RESISTANCE 1
Ciclev10023338m		scion to stock	Leaves
Ciclev10023418m	stock to scion	scion to stock	Leaves	disease resistance protein (TIR-NBS-LRR class), putative
Ciclev10023421m	stock to scion		Leaves	disease resistance protein (TIR-NBS-LRR class), putative
Ciclev10023424m		scion to stock	Leaves	wall-associated kinase 2
Ciclev10023438m		scion to stock	Leaves	disease resistance protein (TIR-NBS-LRR class)
Ciclev10023457m		scion to stock	Leaves	NAD(P)-binding Rossmann-fold superfamily protein
Ciclev10023464m		scion to stock	Leaves	senescence-related gene 1
Ciclev10023500m		scion to stock	Leaves	homolog of yeast CDT1 A
Ciclev10023520m	stock to scion		Leaves	cytochrome P450, family 72, subfamily A, polypeptide 15
Ciclev10023521m		scion to stock	Leaves	digalactosyl diacylglycerol deficient 2
Ciclev10023527m	stock to scion		Leaves	RAB GTPase homolog 1A
Ciclev10023570m	stock to scion		Leaves	cellulose synthase like G3
Ciclev10023574m	stock to scion		Leaves	syntaxin of plants 43
Ciclev10023584m		scion to stock	Leaves	disease resistance protein (TIR-NBS-LRR class), putative
Ciclev10023613m		scion to stock	Leaves	LRR and NB-ARC domains-containing disease resistance protein
Ciclev10023615m		scion to stock	Leaves	Nucleotidyltransferase family protein
Ciclev10023669m		scion to stock	Leaves	NB-ARC domain-containing disease resistance protein
Ciclev10023690m		scion to stock	Leaves	anaphase promoting complex 6
Ciclev10023719m	stock to scion		Leaves	Disease resistance protein (TIR-NBS-LRR class) family
Ciclev10023723m		scion to stock	Leaves	Plant invertase/pectin methylesterase inhibitor superfamily
Ciclev10023734m		scion to stock	Leaves	Protein of unknown function, DUF647
Ciclev10023740m	stock to scion	scion to stock	Leaves	Protein of unknown function (DUF810)
Ciclev10023782m	stock to scion	scion to stock	Leaves	Phosphorylase superfamily protein
Ciclev10023794m	stock to scion		Leaves	Oxidoreductase, zinc-binding dehydrogenase family protein
Ciclev10023830m	stock to scion		Leaves	NmrA-like negative transcriptional regulator family protein
Ciclev10023835m	stock to scion		Leaves	Ankyrin repeat family protein
Ciclev10023845m	stock to scion		Leaves
Ciclev10023853m	stock to scion	scion to stock	Leaves	Leucine-rich repeat transmembrane protein kinase
Ciclev10023854m	stock to scion		Leaves	NAD(P)-binding Rossmann-fold superfamily protein
Ciclev10023867m		scion to stock	Leaves	ARM repeat superfamily protein
Ciclev10023868m	stock to scion		Leaves	FZO-like
Ciclev10023945m	stock to scion		Leaves	shrunken seed protein (SSE1)
Ciclev10023951m		scion to stock	Leaves	NAD(P)-binding Rossmann-fold superfamily protein
Ciclev10023952m	stock to scion		Leaves	transcriptional coactivator p15 (PC4) family protein (KELP)
Ciclev10023973m	stock to scion		Leaves	Protein of unknown function (DUF3537)
Ciclev10023974m	stock to scion		Leaves	Protein kinase superfamily protein
Ciclev10023982m	stock to scion	scion to stock	Leaves	disease resistance protein (TIR-NBS-LRR class), putative
Ciclev10024068m	stock to scion		Leaves	RING/FYVE/PHD-type zinc finger family protein
Ciclev10024076m		scion to stock	Leaves	Wall-associated kinase family protein
Ciclev10024102m	stock to scion		Leaves	transmembrane receptors;ATP binding
Ciclev10024145m		scion to stock	Leaves	HOPZ-ACTIVATED RESISTANCE 1
Ciclev10024152m	stock to scion		Leaves	ubiquitin-associated (UBA)/TS-N domain-containing protein / octicosapeptide/Phox/Bemp1 (PB1) domain-containing protein
Ciclev10024153m		scion to stock	Leaves
Ciclev10024166m	stock to scion		Leaves	D-isomer specific 2-hydroxyacid dehydrogenase family protein
Ciclev10024198m		scion to stock	Leaves	cytochrome p450 72c1
Ciclev10024220m		scion to stock	Leaves	Protein kinase superfamily protein
Ciclev10024285m		scion to stock	Leaves	disease resistance protein (TIR-NBS-LRR class), putative
Ciclev10024314m	stock to scion		Leaves	Leucine-rich repeat transmembrane protein kinase
Ciclev10024331m	stock to scion		Leaves	Protein kinase family protein with leucine-rich repeat domain
Ciclev10024397m		scion to stock	Leaves
Ciclev10024413m	stock to scion		Leaves	XB3 ortholog 5 in Arabidopsis thaliana
Ciclev10024454m	stock to scion	scion to stock	Leaves	LRR and NB-ARC domains-containing disease resistance protein
Ciclev10024456m		scion to stock	Leaves	disease resistance protein (TIR-NBS-LRR class), putative
Ciclev10024458m		scion to stock	Leaves	HOPZ-ACTIVATED RESISTANCE 1
Ciclev10024461m		scion to stock	Leaves	Phosphotyrosine protein phosphatases superfamily protein
Ciclev10024478m	stock to scion		Leaves	NB-ARC domain-containing disease resistance protein
Ciclev10024482m	stock to scion		Leaves	disease resistance protein (TIR-NBS-LRR class), putative
Ciclev10024503m		scion to stock	Leaves	Pentatricopeptide repeat (PPR-like) superfamily protein
Ciclev10024507m	stock to scion		Leaves	disease resistance protein (TIR-NBS-LRR class), putative
Ciclev10024516m		scion to stock	Leaves	anaphase promoting complex 6
Ciclev10024519m	stock to scion		Leaves	Disease resistance protein (TIR-NBS-LRR class) family
Ciclev10024529m		scion to stock	Leaves
Ciclev10024530m	stock to scion		Leaves	NB-ARC domain-containing disease resistance protein
Ciclev10024534m		scion to stock	Leaves	disease resistance protein (TIR-NBS-LRR class), putative
Ciclev10024599m		scion to stock	Leaves	disease resistance protein (TIR-NBS-LRR class), putative
Ciclev10024606m	stock to scion	scion to stock	Leaves	Disease resistance protein (TIR-NBS-LRR class) family
Ciclev10024633m	stock to scion		Leaves
Ciclev10024655m		scion to stock	Leaves	polyribonucleotide nucleotidyltransferase, putative
Ciclev10024660m		scion to stock	Leaves
Ciclev10024669m		scion to stock	Leaves
Ciclev10024676m	stock to scion		Leaves	ATPases;nucleotide binding;ATP binding;nucleoside-triphosphatases;transcription factor binding
Ciclev10024689m	stock to scion	scion to stock	Leaves	Tetratricopeptide repeat (TPR)-like superfamily protein
Ciclev10024692m		scion to stock	Leaves	Tetratricopeptide repeat (TPR)-like superfamily protein
Ciclev10024693m		scion to stock	Leaves	Tetratricopeptide repeat (TPR)-like superfamily protein
Ciclev10024698m		scion to stock	Leaves	Tetratricopeptide repeat (TPR)-like superfamily protein
Ciclev10024713m	stock to scion		Leaves
Ciclev10024717m	stock to scion		Leaves
Ciclev10024721m	stock to scion		Leaves
Ciclev10024724m		scion to stock	Leaves	kinesin like protein for actin based chloroplast movement 1
Ciclev10024735m	stock to scion	scion to stock	Leaves	disease resistance protein (TIR-NBS-LRR class), putative
Ciclev10024761m	stock to scion		Leaves	Protein kinase superfamily protein
Ciclev10024788m		scion to stock	Leaves	aldehyde dehydrogenase 6B2
Ciclev10024795m	stock to scion		Leaves	calcium ATPase 2
Ciclev10024813m		scion to stock	Leaves	glutamate receptor 3.6
Ciclev10024814m		scion to stock	Leaves	NB-ARC domain-containing disease resistance protein
Ciclev10024818m	stock to scion		Leaves	ribonuclease II family protein
Ciclev10024820m		scion to stock	Leaves	NB-ARC domain-containing disease resistance protein
Ciclev10024821m		scion to stock	Leaves	LRR and NB-ARC domains-containing disease resistance protein
Ciclev10024822m		scion to stock	Leaves	RAD3-like DNA-binding helicase protein
Ciclev10024831m		scion to stock	Leaves	LRR and NB-ARC domains-containing disease resistance protein
Ciclev10024833m		scion to stock	Leaves	Disease resistance protein (CC-NBS-LRR class) family
Ciclev10024835m		scion to stock	Leaves	Disease resistance protein (CC-NBS-LRR class) family
Ciclev10024836m	stock to scion		Leaves	Disease resistance protein (CC-NBS-LRR class) family
Ciclev10024840m		scion to stock	Leaves	aconitase 1
Ciclev10024841m		scion to stock	Leaves	Protein kinase superfamily protein
Ciclev10024842m	stock to scion	scion to stock	Leaves	Disease resistance protein (CC-NBS-LRR class) family
Ciclev10024845m		scion to stock	Leaves	Disease resistance protein (CC-NBS-LRR class) family
Ciclev10024851m	stock to scion		Leaves
Ciclev10024855m		scion to stock	Leaves	Disease resistance protein (CC-NBS-LRR class) family
Ciclev10024858m	stock to scion		Leaves	Disease resistance protein (CC-NBS-LRR class) family
Ciclev10024866m		scion to stock	Leaves	Tetratricopeptide repeat (TPR)-like superfamily protein
Ciclev10024868m		scion to stock	Leaves	Disease resistance protein (CC-NBS-LRR class) family
Ciclev10024878m		scion to stock	Leaves
Ciclev10024882m		scion to stock	Leaves	LRR and NB-ARC domains-containing disease resistance protein
Ciclev10024883m	stock to scion		Leaves	heat shock protein 91
Ciclev10024889m		scion to stock	Leaves	K+ uptake permease 7
Ciclev10024896m		scion to stock	Leaves	Protein kinase superfamily protein
Ciclev10024905m	stock to scion	scion to stock	Leaves	Protein kinase superfamily protein
Ciclev10024906m	stock to scion	scion to stock	Leaves	S-domain-2 5
Ciclev10024913m		scion to stock	Leaves	RPS5-like 1
Ciclev10024915m		scion to stock	Leaves
Ciclev10024935m		scion to stock	Leaves	transducin family protein / WD-40 repeat family protein
Ciclev10024937m	stock to scion		Leaves	Tetratricopeptide repeat (TPR)-like superfamily protein
Ciclev10024946m		scion to stock	Leaves	Inorganic H pyrophosphatase family protein
Ciclev10024954m		scion to stock	Leaves	Tetratricopeptide repeat (TPR)-like superfamily protein
Ciclev10024968m	stock to scion		Leaves	oligopeptide transporter 1
Ciclev10024969m		scion to stock	Leaves	hydroxyproline-rich glycoprotein family protein
Ciclev10025008m	stock to scion	scion to stock	Leaves	Disease resistance protein (CC-NBS-LRR class) family
Ciclev10025016m		scion to stock	Leaves	LETM1-like protein
Ciclev10025033m		scion to stock	Leaves	Tetratricopeptide repeat (TPR)-like superfamily protein
Ciclev10025035m	stock to scion		Leaves	Protein kinase superfamily protein
Ciclev10025040m		scion to stock	Leaves	FG-GAP repeat-containing protein
Ciclev10025048m		scion to stock	Leaves	SIN-like family protein
Ciclev10025049m		scion to stock	Leaves	Polynucleotide adenylyltransferase family protein
Ciclev10025063m	stock to scion		Leaves	transmembrane nine 7
Ciclev10025086m		scion to stock	Leaves	CTC-interacting domain 4
Ciclev10025102m		scion to stock	Leaves	heat shock protein 70B
Ciclev10025107m	stock to scion	scion to stock	Leaves	Tetratricopeptide repeat (TPR)-like superfamily protein
Ciclev10025108m		scion to stock	Leaves	Pentatricopeptide repeat (PPR) superfamily protein
Ciclev10025112m	stock to scion		Leaves	alpha/beta-Hydrolases superfamily protein
Ciclev10025148m		scion to stock	Leaves	D-3-phosphoglycerate dehydrogenase
Ciclev10025161m	stock to scion		Leaves	Protein of unknown function (DUF668)
Ciclev10025166m	stock to scion		Leaves	Tetratricopeptide repeat (TPR)-like superfamily protein
Ciclev10025175m		scion to stock	Leaves	Leucine-rich repeat protein kinase family protein
Ciclev10025185m		scion to stock	Leaves	AMP-dependent synthetase and ligase family protein
Ciclev10025192m	stock to scion		Leaves	CDPK-related kinase
Ciclev10025220m		scion to stock	Leaves	RADIATION SENSITIVE 17
Ciclev10025229m	stock to scion		Leaves	Splicing factor, CC1-like
Ciclev10025234m	stock to scion		Leaves	Transcription initiation factor TFIID subunit A
Ciclev10025236m		scion to stock	Leaves	disproportionating enzyme
Ciclev10025241m		scion to stock	Leaves	F-box/RNI-like superfamily protein
Ciclev10025247m		scion to stock	Leaves	Protein kinase superfamily protein
Ciclev10025256m	stock to scion		Leaves	ACT-like protein tyrosine kinase family protein
Ciclev10025259m		scion to stock	Leaves	Glycosyl hydrolases family 32 protein
Ciclev10025268m	stock to scion		Leaves	plant intracellular ras group-related LRR 4
Ciclev10025286m	stock to scion		Leaves	Major facilitator superfamily protein
Ciclev10025293m		scion to stock	Leaves	FAD/NAD(P)-binding oxidoreductase family protein
Ciclev10025309m		scion to stock	Leaves	Major facilitator superfamily protein
Ciclev10025313m		scion to stock	Leaves	Pentatricopeptide repeat (PPR) superfamily protein
Ciclev10025322m		scion to stock	Leaves	F-box/RNI-like superfamily protein
Ciclev10025325m		scion to stock	Leaves	Seven transmembrane MLO family protein
Ciclev10025327m		scion to stock	Leaves	Rab escort protein
Ciclev10025338m		scion to stock	Leaves	ferrochelatase 2
Ciclev10025347m	stock to scion		Leaves
Ciclev10025361m		scion to stock	Leaves	Eukaryotic aspartyl protease family protein
Ciclev10025372m		scion to stock	Leaves	serine transhydroxymethyltransferase 1
Ciclev10025375m		scion to stock	Leaves	Serine carboxypeptidase S28 family protein
Ciclev10025387m		scion to stock	Leaves	Zinc-finger domain of monoamine-oxidase A repressor R1
Ciclev10025394m		scion to stock	Leaves	NRAMP metal ion transporter 2
Ciclev10025411m	stock to scion	scion to stock	Leaves	aldehyde dehydrogenase 7B4
Ciclev10025441m	stock to scion		Leaves	Molecular chaperone Hsp40/DnaJ family protein
Ciclev10025475m		scion to stock	Leaves	Major facilitator superfamily protein
Ciclev10025476m	stock to scion		Leaves	UDP-glucosyl transferase 85A2
Ciclev10025483m	stock to scion		Leaves	Phototropic-responsive NPH3 family protein
Ciclev10025507m		scion to stock	Leaves	Tetratricopeptide repeat (TPR)-like superfamily protein
Ciclev10025527m	stock to scion		Leaves	casein kinase 1-like protein 2
Ciclev10025544m		scion to stock	Leaves	NDH-dependent cyclic electron flow 1
Ciclev10025568m		scion to stock	Leaves	SAP domain-containing protein
Ciclev10025598m		scion to stock	Leaves	Protein kinase superfamily protein
Ciclev10025618m		scion to stock	Leaves	Protein kinase superfamily protein
Ciclev10025621m		scion to stock	Leaves	Protein phosphatase 2C family protein
Ciclev10025625m	stock to scion	scion to stock	Leaves	Disease resistance protein (CC-NBS-LRR class) family
Ciclev10025630m		scion to stock	Leaves	FMN-linked oxidoreductases superfamily protein
Ciclev10025636m	stock to scion		Leaves	O-fucosyltransferase family protein
Ciclev10025683m		scion to stock	Leaves	casein kinase alpha 1
Ciclev10025693m	stock to scion	scion to stock	Leaves	Disease resistance protein (CC-NBS-LRR class) family
Ciclev10025712m		scion to stock	Leaves	Tetratricopeptide repeat (TPR)-like superfamily protein
Ciclev10025723m		scion to stock	Leaves	RNA binding;GTP binding
Ciclev10025724m		scion to stock	Leaves	eukaryotic translation initiation factor 4A1
Ciclev10025746m		scion to stock	Leaves	F-box family protein
Ciclev10025756m		scion to stock	Leaves	Actin-like ATPase superfamily protein
Ciclev10025760m		scion to stock	Leaves
Ciclev10025766m		scion to stock	Leaves	BRCT domain-containing DNA repair protein
Ciclev10025781m		scion to stock	Leaves	Protein phosphatase 2C family protein
Ciclev10025783m	stock to scion		Leaves
Ciclev10025790m		scion to stock	Leaves	Eukaryotic translation initiation factor 2B (eIF-2B) family protein
Ciclev10025803m	stock to scion		Leaves	E3 Ubiquitin ligase family protein
Ciclev10025807m		scion to stock	Leaves	Chalcone and stilbene synthase family protein
Ciclev10025812m		scion to stock	Leaves	Low PSII Accumulation 3
Ciclev10025816m		scion to stock	Leaves	related to AP2 12
Ciclev10025822m	stock to scion		Leaves	NAD(P)H dehydrogenase (quinone)s
Ciclev10025839m		scion to stock	Leaves	Protein of unknown function (DUF677)
Ciclev10025844m		scion to stock	Leaves	GATA transcription factor 5
Ciclev10025862m		scion to stock	Leaves	RNA-binding (RRM/RBD/RNP motifs) family protein
Ciclev10025884m		scion to stock	Leaves	Protein of unknown function (DUF581)
Ciclev10025894m		scion to stock	Leaves	GTP-binding protein-related
Ciclev10025906m		scion to stock	Leaves	zinc finger (Ran-binding) family protein
Ciclev10025931m	stock to scion		Leaves	flavanone 3-hydroxylase
Ciclev10025944m	stock to scion		Leaves
Ciclev10025963m		scion to stock	Leaves	G-box binding factor 1
Ciclev10025966m	stock to scion		Leaves	methionine aminopeptidase 1D
Ciclev10025975m		scion to stock	Leaves	Transducin/WD40 repeat-like superfamily protein
Ciclev10025986m		scion to stock	Leaves
Ciclev10025991m		scion to stock	Leaves
Ciclev10025993m		scion to stock	Leaves	Lateral root primordium (LRP) protein-related
Ciclev10025998m		scion to stock	Leaves	Mitochondrial substrate carrier family protein
Ciclev10026033m		scion to stock	Leaves	Homeodomain-like superfamily protein
Ciclev10026038m		scion to stock	Leaves	Ras-related small GTP-binding family protein
Ciclev10026043m		scion to stock	Leaves	aspartate-glutamate racemase family
Ciclev10026049m		scion to stock	Leaves	carboxyesterase 18
Ciclev10026055m		scion to stock	Leaves	2-oxoglutarate (2OG) and Fe(II)-dependent oxygenase superfamily protein
Ciclev10026061m		scion to stock	Leaves	OBF binding protein 1
Ciclev10026076m	stock to scion		Leaves	phytochrome-associated protein 1
Ciclev10026081m		scion to stock	Leaves	Haloacid dehalogenase-like hydrolase (HAD) superfamily protein
Ciclev10026092m		scion to stock	Leaves	GRAM domain family protein
Ciclev10026096m	stock to scion		Leaves	Pyridoxal phosphate phosphatase-related protein
Ciclev10026102m	stock to scion		Leaves	Brassinosteroid signalling positive regulator (BZR1) family protein
Ciclev10026104m	stock to scion		Leaves	MRG family protein
Ciclev10026115m	stock to scion		Leaves	proton gradient regulation 7
Ciclev10026117m	stock to scion		Leaves	folate transporter 1
Ciclev10026120m		scion to stock	Leaves	D-isomer specific 2-hydroxyacid dehydrogenase family protein
Ciclev10026134m		scion to stock	Leaves	S-adenosyl-L-methionine-dependent methyltransferases superfamily protein
Ciclev10026137m	stock to scion		Leaves	AP2/B3-like transcriptional factor family protein
Ciclev10026139m		scion to stock	Leaves	Pathogenesis-related thaumatin superfamily protein
Ciclev10026140m	stock to scion		Leaves	Mitochondrial substrate carrier family protein
Ciclev10026145m	stock to scion		Leaves	SEC-C motif-containing protein / OTU-like cysteine protease family protein
Ciclev10026158m		scion to stock	Leaves
Ciclev10026159m		scion to stock	Leaves	shikimate kinase 1
Ciclev10026168m	stock to scion	scion to stock	Leaves	transducin family protein / WD-40 repeat family protein
Ciclev10026169m	stock to scion		Leaves
Ciclev10026188m		scion to stock	Leaves
Ciclev10026216m		scion to stock	Leaves	GNS1/SUR4 membrane protein family
Ciclev10026219m	stock to scion		Leaves	P-loop containing nucleoside triphosphate hydrolases superfamily protein
Ciclev10026221m		scion to stock	Leaves	Thioredoxin superfamily protein
Ciclev10026241m		scion to stock	Leaves	2-oxoglutarate (2OG) and Fe(II)-dependent oxygenase superfamily protein
Ciclev10026281m		scion to stock	Leaves	RING/FYVE/PHD zinc finger superfamily protein
Ciclev10026305m	stock to scion	scion to stock	Leaves
Ciclev10026310m		scion to stock	Leaves	Quinone reductase family protein
Ciclev10026315m	stock to scion	scion to stock	Leaves	Ubiquitin-conjugating enzyme family protein
Ciclev10026320m		scion to stock	Leaves
Ciclev10026329m		scion to stock	Leaves	RING/U-box superfamily protein
Ciclev10026330m		scion to stock	Leaves
Ciclev10026346m		scion to stock	Leaves	pyrophosphorylase 2
Ciclev10026349m		scion to stock	Leaves	nicotinamidase 1
Ciclev10026361m		scion to stock	Leaves	O-methyltransferase 1
Ciclev10026366m		scion to stock	Leaves	Chaperone DnaJ-domain superfamily protein
Ciclev10026368m	stock to scion		Leaves	Putative methyltransferase family protein
Ciclev10026390m		scion to stock	Leaves	HSP20-like chaperones superfamily protein
Ciclev10026393m		scion to stock	Leaves
Ciclev10026399m		scion to stock	Leaves	DNA binding;DNA-directed RNA polymerases
Ciclev10026425m	stock to scion		Leaves	Domain of unknown function (DUF298)
Ciclev10026429m	stock to scion		Leaves
Ciclev10026432m		scion to stock	Leaves
Ciclev10026450m	stock to scion		Leaves	Synaptobrevin family protein
Ciclev10026488m	stock to scion		Leaves
Ciclev10026499m		scion to stock	Leaves	RAB GTPase homolog H1E
Ciclev10026500m	stock to scion		Leaves	SEC14 cytosolic factor family protein / phosphoglyceride transfer family protein
Ciclev10026511m	stock to scion		Leaves	cold-regulated 413-plasma membrane 2
Ciclev10026543m	stock to scion		Leaves
Ciclev10026551m	stock to scion	scion to stock	Leaves
Ciclev10026559m		scion to stock	Leaves
Ciclev10026560m		scion to stock	Leaves	plastid developmental protein DAG, putative
Ciclev10026592m		scion to stock	Leaves	ADP-ribosylation factor A1F
Ciclev10026604m		scion to stock	Leaves	Nucleoside diphosphate kinase family protein
Ciclev10026606m	stock to scion		Leaves	Calcium-binding EF-hand family protein
Ciclev10026619m	stock to scion		Leaves	VQ motif-containing protein
Ciclev10026620m		scion to stock	Leaves
Ciclev10026628m		scion to stock	Leaves
Ciclev10026629m	stock to scion		Leaves	glutaredoxin 4
Ciclev10026648m	stock to scion	scion to stock	Leaves	Clathrin adaptor complex small chain family protein
Ciclev10026659m		scion to stock	Leaves	Chaperone DnaJ-domain superfamily protein
Ciclev10026665m	stock to scion	scion to stock	Leaves
Ciclev10026691m		scion to stock	Leaves	sulfurtransferase 18
Ciclev10026728m	stock to scion		Leaves	Late embryogenesis abundant protein (LEA) family protein
Ciclev10026757m	stock to scion		Leaves	hydroxyproline-rich glycoprotein family protein
Ciclev10026804m		scion to stock	Leaves
Ciclev10026815m		scion to stock	Leaves	RING-box 1
Ciclev10026820m	stock to scion		Leaves
Ciclev10026838m	stock to scion	scion to stock	Leaves
Ciclev10026860m		scion to stock	Leaves
Ciclev10026862m	stock to scion		Leaves	RAD-like 6
Ciclev10026913m		scion to stock	Leaves
Ciclev10026925m	stock to scion		Leaves	global transcription factor group E2
Ciclev10026928m		scion to stock	Leaves	EF-TU receptor
Ciclev10027030m	stock to scion	scion to stock	Leaves	S-locus lectin protein kinase family protein
Ciclev10027047m		scion to stock	Leaves	Disease resistance protein (CC-NBS-LRR class) family
Ciclev10027093m		scion to stock	Leaves	RING/U-box superfamily protein
Ciclev10027172m	stock to scion	scion to stock	Leaves	LRR and NB-ARC domains-containing disease resistance protein
Ciclev10027185m	stock to scion		Leaves	heat shock protein 70 (Hsp 70) family protein
Ciclev10027193m		scion to stock	Leaves	Tetratricopeptide repeat (TPR)-like superfamily protein
Ciclev10027298m		scion to stock	Leaves	Disease resistance protein (CC-NBS-LRR class) family
Ciclev10027317m	stock to scion	scion to stock	Leaves	silencing defective 5
Ciclev10027323m		scion to stock	Leaves	zeaxanthin epoxidase (ZEP) (ABA1)
Ciclev10027336m	stock to scion		Leaves
Ciclev10027412m		scion to stock	Leaves	Protein phosphatase 2C family protein
Ciclev10027439m		scion to stock	Leaves	serine carboxypeptidase-like 29
Ciclev10027449m	stock to scion		Leaves	F-box family protein
Ciclev10027460m		scion to stock	Leaves	SAP domain-containing protein
Ciclev10027467m	stock to scion		Leaves	lectin protein kinase family protein
Ciclev10027469m	stock to scion		Leaves	Tetratricopeptide repeat (TPR)-like superfamily protein
Ciclev10027506m		scion to stock	Leaves	protein kinase family protein
Ciclev10027517m		scion to stock	Leaves	Disease resistance protein (CC-NBS-LRR class) family
Ciclev10027558m		scion to stock	Leaves
Ciclev10027579m	stock to scion		Leaves	UDP-Glycosyltransferase superfamily protein
Ciclev10027580m		scion to stock	Leaves	Tetratricopeptide repeat (TPR)-like superfamily protein
Ciclev10027593m		scion to stock	Leaves	LRR and NB-ARC domains-containing disease resistance protein
Ciclev10027601m	stock to scion	scion to stock	Leaves	NB-ARC domain-containing disease resistance protein
Ciclev10027602m		scion to stock	Leaves	Pentatricopeptide repeat (PPR-like) superfamily protein
Ciclev10027618m		scion to stock	Leaves
Ciclev10027660m	stock to scion		Leaves	Ataxia telangiectasia-mutated and RAD3-related
Ciclev10027673m		scion to stock	Leaves	nucleic acid binding;zinc ion binding;DNA binding
Ciclev10027682m		scion to stock	Leaves	abscisic aldehyde oxidase 3
Ciclev10027689m	stock to scion		Leaves	PHD finger transcription factor, putative
Ciclev10027700m	stock to scion		Leaves	Structural maintenance of chromosomes (SMC) family protein
Ciclev10027707m		scion to stock	Leaves	P-loop containing nucleoside triphosphate hydrolases superfamily protein
Ciclev10027708m	stock to scion	scion to stock	Leaves	extra-large G-protein 1
Ciclev10027721m		scion to stock	Leaves	P-loop containing nucleoside triphosphate hydrolases superfamily protein
Ciclev10027732m		scion to stock	Leaves	pre-mRNA-processing protein 40B
Ciclev10027737m		scion to stock	Leaves	Adaptor protein complex AP-2, alpha subunit
Ciclev10027742m		scion to stock	Leaves	BRI1 suppressor 1 (BSU1)-like 3
Ciclev10027745m	stock to scion		Leaves	phototropin 2
Ciclev10027748m		scion to stock	Leaves	Leucine-rich receptor-like protein kinase family protein
Ciclev10027750m	stock to scion	scion to stock	Leaves	Argonaute family protein
Ciclev10027755m		scion to stock	Leaves	Argonaute family protein
Ciclev10027760m		scion to stock	Leaves	Argonaute family protein
Ciclev10027763m	stock to scion		Leaves	Argonaute family protein
Ciclev10027764m	stock to scion		Leaves	vacuolar protein sorting 41
Ciclev10027766m	stock to scion		Leaves
Ciclev10027772m	stock to scion		Leaves	homolog of RAD54
Ciclev10027788m		scion to stock	Leaves	U-box domain-containing protein kinase family protein
Ciclev10027792m	stock to scion		Leaves	Protein of unknown function (DUF630 and DUF632)
Ciclev10027795m		scion to stock	Leaves	SNF2 domain-containing protein / helicase domain-containing protein
Ciclev10027804m	stock to scion		Leaves	DNA-binding family protein
Ciclev10027815m		scion to stock	Leaves	alpha-glucan phosphorylase 2
Ciclev10027827m		scion to stock	Leaves	Tetratricopeptide repeat (TPR)-like superfamily protein
Ciclev10027829m	stock to scion		Leaves
Ciclev10027837m		scion to stock	Leaves	FTSH protease 10
Ciclev10027849m		scion to stock	Leaves	S-locus lectin protein kinase family protein
Ciclev10027850m	stock to scion		Leaves	subtilase 1.3
Ciclev10027852m	stock to scion		Leaves	K+ efflux antiporter 3
Ciclev10027864m	stock to scion		Leaves	RNA-binding KH domain-containing protein
Ciclev10027866m	stock to scion	scion to stock	Leaves	Glycosyl hydrolase family protein with chitinase insertion domain
Ciclev10027872m	stock to scion		Leaves	fructose-2,6-bisphosphatase
Ciclev10027878m		scion to stock	Leaves	DCD (Development and Cell Death) domain protein
Ciclev10027890m		scion to stock	Leaves	phytochrome interacting factor 3
Ciclev10027901m		scion to stock	Leaves	auxin response factor 10
Ciclev10027908m	stock to scion		Leaves	F-box family protein
Ciclev10027912m		scion to stock	Leaves	PHE ammonia lyase 1
Ciclev10027913m	stock to scion	scion to stock	Leaves	PHE ammonia lyase 1
Ciclev10027926m		scion to stock	Leaves	SCARECROW-like 14
Ciclev10027940m		scion to stock	Leaves	SCARECROW-like 14
Ciclev10027951m		scion to stock	Leaves	Protein kinase superfamily protein
Ciclev10027957m	stock to scion		Leaves	Concanavalin A-like lectin protein kinase family protein
Ciclev10027970m	stock to scion		Leaves	myosin heavy chain-related
Ciclev10027973m		scion to stock	Leaves	evolutionarily conserved C-terminal region 5
Ciclev10027997m		scion to stock	Leaves	Pentatricopeptide repeat (PPR) superfamily protein
Ciclev10028052m	stock to scion		Leaves	ethylene-dependent gravitropism-deficient and yellow-green-like 3
Ciclev10028057m		scion to stock	Leaves	high chlorophyll fluorescence phenotype 173
Ciclev10028070m		scion to stock	Leaves	ATPase, V1 complex, subunit B protein
Ciclev10028072m		scion to stock	Leaves	RING/U-box superfamily protein
Ciclev10028087m	stock to scion		Leaves	phospholipase C 2
Ciclev10028103m	stock to scion		Leaves	3-methylcrotonyl-CoA carboxylase
Ciclev10028110m		scion to stock	Leaves	calmodulin-domain protein kinase 5
Ciclev10028122m	stock to scion		Leaves	ferulic acid 5-hydroxylase 1
Ciclev10028123m		scion to stock	Leaves	MATE efflux family protein
Ciclev10028124m	stock to scion	scion to stock	Leaves	ATP binding;nucleic acid binding;helicases
Ciclev10028129m	stock to scion		Leaves	O-fucosyltransferase family protein
Ciclev10028132m	stock to scion		Leaves	Tetratricopeptide repeat (TPR)-like superfamily protein
Ciclev10028134m		scion to stock	Leaves	Tetratricopeptide repeat (TPR)-like superfamily protein
Ciclev10028136m	stock to scion		Leaves	alpha/beta-Hydrolases superfamily protein
Ciclev10028139m	stock to scion		Leaves	AMP-dependent synthetase and ligase family protein
Ciclev10028158m		scion to stock	Leaves	Transducin/WD40 repeat-like superfamily protein
Ciclev10028165m	stock to scion		Leaves	Ankyrin repeat family protein
Ciclev10028170m		scion to stock	Leaves	polyol/monosaccharide transporter 5
Ciclev10028171m		scion to stock	Leaves	aldehyde dehydrogenase 6B2
Ciclev10028174m		scion to stock	Leaves	polyol/monosaccharide transporter 5
Ciclev10028181m		scion to stock	Leaves	ATP binding;nucleic acid binding;helicases
Ciclev10028191m		scion to stock	Leaves	thymidylate synthase 1
[truncated: 3,006 more rows]

## Sheet: Table S6
Table S6 Mobile genes transmitted bi-directionally into both scions and rootstocks
Gene ID	Direction		Tissues	Annotation
Ciclev10000127m	stock to scion	scion to stock	Leaves	C2 calcium/lipid-binding plant phosphoribosyltransferase family protein
Ciclev10000133m	stock to scion	scion to stock	Leaves	Insulinase (Peptidase family M16) family protein
Ciclev10000152m	stock to scion	scion to stock	Leaves	heteroglycan glucosidase 1
Ciclev10000346m	stock to scion	scion to stock	Leaves	C2 calcium/lipid-binding plant phosphoribosyltransferase family protein
Ciclev10000582m	stock to scion	scion to stock	Leaves	Methylthiotransferase
Ciclev10000653m	stock to scion	scion to stock	Leaves	cysteine-rich RLK (RECEPTOR-like protein kinase) 10
Ciclev10000710m	stock to scion	scion to stock	Leaves	phosphatidylserine decarboxylase 2
Ciclev10000776m	stock to scion	scion to stock	Leaves	aldehyde dehydrogenase 3I1
Ciclev10000793m	stock to scion	scion to stock	Leaves	CBS / octicosapeptide/Phox/Bemp1 (PB1) domains-containing protein
Ciclev10001058m	stock to scion	scion to stock	Leaves	Basic-leucine zipper (bZIP) transcription factor family protein
Ciclev10001464m	stock to scion	scion to stock	Leaves	D111/G-patch domain-containing protein
Ciclev10001823m	stock to scion	scion to stock	Leaves	F-box protein 7
Ciclev10002223m	stock to scion	scion to stock	Leaves	like COV 2
Ciclev10002605m	stock to scion	scion to stock	Leaves	Nitrogen regulatory PII-like, alpha/beta
Ciclev10003207m	stock to scion	scion to stock	Leaves	protein dimerizations
Ciclev10003685m	stock to scion	scion to stock	Leaves	NB-ARC domain-containing disease resistance protein
Ciclev10003868m	stock to scion	scion to stock	Leaves	NAD(P)-binding Rossmann-fold superfamily protein
Ciclev10004103m	stock to scion	scion to stock	Leaves	cytochrome P450, family 83, subfamily B, polypeptide 1
Ciclev10004215m	stock to scion	scion to stock	Leaves	zinc knuckle (CCHC-type) family protein
Ciclev10004247m	stock to scion	scion to stock	Leaves	Leucine-rich repeat protein kinase family protein
Ciclev10004253m	stock to scion	scion to stock	Leaves	disease resistance family protein / LRR family protein
Ciclev10004319m	stock to scion	scion to stock	Leaves	binding
Ciclev10004610m	stock to scion	scion to stock	Leaves	DHFS-FPGS homolog C
Ciclev10004875m	stock to scion	scion to stock	Leaves	ureidoglycolate amidohydrolase
Ciclev10004901m	stock to scion	scion to stock	Leaves	cyclic nucleotide gated channel 1
Ciclev10005196m	stock to scion	scion to stock	Leaves	mercaptopyruvate sulfurtransferase 1
Ciclev10005425m	stock to scion	scion to stock	Leaves	alpha/beta-Hydrolases superfamily protein
Ciclev10006006m	stock to scion	scion to stock	Leaves	Chlorophyll A-B binding family protein
Ciclev10006087m	stock to scion	scion to stock	Leaves	RNA polymerase II, Rpb4, core protein
Ciclev10006797m	stock to scion	scion to stock	Leaves	EF-TU receptor
Ciclev10007274m	stock to scion	scion to stock	Leaves	DEA(D/H)-box RNA helicase family protein
Ciclev10007395m	stock to scion	scion to stock	Leaves	transducin family protein / WD-40 repeat family protein
Ciclev10007502m	stock to scion	scion to stock	Leaves	Voltage-gated chloride channel family protein
Ciclev10007886m	stock to scion	scion to stock	Leaves	phosphofructokinase 3
Ciclev10008058m	stock to scion	scion to stock	Leaves	Cyclophilin-like peptidyl-prolyl cis-trans isomerase family protein
Ciclev10008061m	stock to scion	scion to stock	Leaves	SMAD/FHA domain-containing protein
Ciclev10008077m	stock to scion	scion to stock	Leaves	aldehyde dehydrogenase 2C4
Ciclev10008153m	stock to scion	scion to stock	Leaves	purple acid phosphatase 26
Ciclev10008418m	stock to scion	scion to stock	Leaves	Protein kinase superfamily protein
Ciclev10008919m	stock to scion	scion to stock	Leaves	HMG (high mobility group) box protein with ARID/BRIGHT DNA-binding domain
Ciclev10009426m	stock to scion	scion to stock	Leaves	RAN GTPase 3
Ciclev10009426m	stock to scion	scion to stock	Leaves	RAN GTPase 3
Ciclev10009486m	stock to scion	scion to stock	Leaves	OTU-like cysteine protease family protein
Ciclev10009664m	stock to scion	scion to stock	Leaves	Ribosomal protein L31
Ciclev10010467m	stock to scion	scion to stock	Leaves	disease resistance family protein / LRR family protein
Ciclev10010809m	stock to scion	scion to stock	Leaves	Auxin efflux carrier family protein
Ciclev10010967m	stock to scion	scion to stock	Leaves	Leucine-rich repeat protein kinase family protein
Ciclev10011132m	stock to scion	scion to stock	Leaves	GDA1/CD39 nucleoside phosphatase family protein
Ciclev10011312m	stock to scion	scion to stock	Leaves	cytochrome P450, family 97, subfamily A, polypeptide 3
Ciclev10011385m	stock to scion	scion to stock	Leaves
Ciclev10011898m	stock to scion	scion to stock	Leaves	Aldolase superfamily protein
Ciclev10012044m	stock to scion	scion to stock	Leaves	sequence-specific DNA binding transcription factors;DNA binding;DNA binding
Ciclev10012166m	stock to scion	scion to stock	Leaves	NAD(P)-binding Rossmann-fold superfamily protein
Ciclev10012267m	stock to scion	scion to stock	Leaves	NAD(P)-linked oxidoreductase superfamily protein
Ciclev10013120m	stock to scion	scion to stock	Leaves	Defender against death (DAD family) protein
Ciclev10013582m	stock to scion	scion to stock	Leaves	gamete-expressed 3
Ciclev10013993m	stock to scion	scion to stock	Leaves	NB-ARC domain-containing disease resistance protein
Ciclev10014019m	stock to scion	scion to stock	Leaves	chromatin remodeling 5
Ciclev10014025m	stock to scion	scion to stock	Leaves	5\'-3\' exonuclease family protein
Ciclev10014126m	stock to scion	scion to stock	Leaves	receptor-like kinase in flowers 1
Ciclev10014231m	stock to scion	scion to stock	Leaves	receptor serine/threonine kinase, putative
Ciclev10014534m	stock to scion	scion to stock	Leaves	cysteine-rich RLK (RECEPTOR-like protein kinase) 14
Ciclev10014550m	stock to scion	scion to stock	Leaves	Esterase/lipase/thioesterase family protein
Ciclev10014662m	stock to scion	scion to stock	Leaves	Microtubule associated protein (MAP65/ASE1) family protein
Ciclev10014912m	stock to scion	scion to stock	Leaves	U2 snRNP auxilliary factor, large subunit, splicing factor
Ciclev10014996m	stock to scion	scion to stock	Leaves	serine carboxypeptidase-like 20
Ciclev10015116m	stock to scion	scion to stock	Leaves	Beta-ketoacyl synthase
Ciclev10015249m	stock to scion	scion to stock	Leaves	HXXXD-type acyl-transferase family protein
Ciclev10015390m	stock to scion	scion to stock	Leaves
Ciclev10015421m	stock to scion	scion to stock	Leaves	Myzus persicae-induced lipase 1
Ciclev10015539m	stock to scion	scion to stock	Leaves	lysophosphatidyl acyltransferase 2
Ciclev10015622m	stock to scion	scion to stock	Leaves	2-oxoglutarate (2OG) and Fe(II)-dependent oxygenase superfamily protein
Ciclev10015874m	stock to scion	scion to stock	Leaves	carbonic anhydrase 1
Ciclev10016066m	stock to scion	scion to stock	Leaves	Molybdenum cofactor sulfurase family protein
Ciclev10016559m	stock to scion	scion to stock	Leaves	PHD finger family protein / bromo-adjacent homology (BAH) domain-containing protein
Ciclev10016662m	stock to scion	scion to stock	Leaves
Ciclev10017175m	stock to scion	scion to stock	Leaves	sulfiredoxin
Ciclev10017332m	stock to scion	scion to stock	Leaves	ribosomal protein S27
Ciclev10017501m	stock to scion	scion to stock	Leaves	indole-3-butyric acid response 1
Ciclev10017571m	stock to scion	scion to stock	Leaves	nucleotide binding;nucleic acid binding;RNA binding
Ciclev10017695m	stock to scion	scion to stock	Leaves	S-domain-2 5
Ciclev10017808m	stock to scion	scion to stock	Leaves	beta-galactosidase 8
Ciclev10018028m	stock to scion	scion to stock	Leaves	Tryptophan/tyrosine permease
Ciclev10018428m	stock to scion	scion to stock	Leaves	ILITYHIA
Ciclev10018495m	stock to scion	scion to stock	Leaves	transducin family protein / WD-40 repeat family protein
Ciclev10018507m	stock to scion	scion to stock	Leaves	LRR and NB-ARC domains-containing disease resistance protein
Ciclev10018509m	stock to scion	scion to stock	Leaves	LRR and NB-ARC domains-containing disease resistance protein
Ciclev10018747m	stock to scion	scion to stock	Leaves	disease resistance protein (TIR-NBS-LRR class), putative
Ciclev10018756m	stock to scion	scion to stock	Leaves	aspartate kinase-homoserine dehydrogenase ii
Ciclev10018760m	stock to scion	scion to stock	Leaves	ARM repeat superfamily protein
Ciclev10019285m	stock to scion	scion to stock	Leaves	NAD(P)-binding Rossmann-fold superfamily protein
Ciclev10019435m	stock to scion	scion to stock	Leaves	C2 domain-containing protein / GRAM domain-containing protein
Ciclev10019583m	stock to scion	scion to stock	Leaves	TCP-1/cpn60 chaperonin family protein
Ciclev10019800m	stock to scion	scion to stock	Leaves	aldehyde dehydrogenase 10A8
Ciclev10019812m	stock to scion	scion to stock	Leaves	phytochelatin synthase 1 (PCS1)
Ciclev10019959m	stock to scion	scion to stock	Leaves	indeterminate(ID)-domain 12
Ciclev10020003m	stock to scion	scion to stock	Leaves	TRICHOME BIREFRINGENCE-LIKE 11
Ciclev10020267m	stock to scion	scion to stock	Leaves	Protein kinase superfamily protein
Ciclev10020578m	stock to scion	scion to stock	Leaves
Ciclev10020764m	stock to scion	scion to stock	Leaves	Protein kinase superfamily protein
Ciclev10020836m	stock to scion	scion to stock	Leaves	actin-related protein 4
Ciclev10020919m	stock to scion	scion to stock	Leaves	UDP-D-glucose/UDP-D-galactose 4-epimerase 5
Ciclev10021214m	stock to scion	scion to stock	Leaves	S-adenosyl-L-methionine-dependent methyltransferases superfamily protein
Ciclev10021398m	stock to scion	scion to stock	Leaves	Phenazine biosynthesis PhzC/PhzF protein
Ciclev10021447m	stock to scion	scion to stock	Leaves	Tetraspanin family protein
Ciclev10021806m	stock to scion	scion to stock	Leaves
Ciclev10022553m	stock to scion	scion to stock	Leaves	HVA22 homologue A
Ciclev10022961m	stock to scion	scion to stock	Leaves	Ribosomal protein L36e family protein
Ciclev10023613m	stock to scion	scion to stock	Leaves	LRR and NB-ARC domains-containing disease resistance protein
Ciclev10023786m	stock to scion	scion to stock	Leaves	Class I glutamine amidotransferase-like superfamily protein
Ciclev10024194m	stock to scion	scion to stock	Leaves	VEFS-Box of polycomb protein
Ciclev10024301m	stock to scion	scion to stock	Leaves	D-cysteine desulfhydrase
Ciclev10024454m	stock to scion	scion to stock	Leaves	LRR and NB-ARC domains-containing disease resistance protein
Ciclev10024606m	stock to scion	scion to stock	Leaves	Disease resistance protein (TIR-NBS-LRR class) family
Ciclev10024621m	stock to scion	scion to stock	Leaves	Disease resistance protein (TIR-NBS-LRR class)
Ciclev10024689m	stock to scion	scion to stock	Leaves	Tetratricopeptide repeat (TPR)-like superfamily protein
Ciclev10024698m	stock to scion	scion to stock	Leaves	Tetratricopeptide repeat (TPR)-like superfamily protein
Ciclev10024724m	stock to scion	scion to stock	Leaves	kinesin like protein for actin based chloroplast movement 1
Ciclev10024735m	stock to scion	scion to stock	Leaves	disease resistance protein (TIR-NBS-LRR class), putative
Ciclev10024834m	stock to scion	scion to stock	Leaves	Disease resistance protein (CC-NBS-LRR class) family
Ciclev10024891m	stock to scion	scion to stock	Leaves	Homeobox-leucine zipper family protein / lipid-binding START domain-containing protein
Ciclev10024894m	stock to scion	scion to stock	Leaves	Tetratricopeptide repeat (TPR)-like superfamily protein
Ciclev10024905m	stock to scion	scion to stock	Leaves	Protein kinase superfamily protein
Ciclev10025207m	stock to scion	scion to stock	Leaves	Protein of unknown function (DUF3550/UPF0682)
Ciclev10025358m	stock to scion	scion to stock	Leaves	Protein of unknown function, DUF647
Ciclev10025621m	stock to scion	scion to stock	Leaves	Protein phosphatase 2C family protein
Ciclev10025693m	stock to scion	scion to stock	Leaves	Disease resistance protein (CC-NBS-LRR class) family
Ciclev10026058m	stock to scion	scion to stock	Leaves	heat shock factor 4
Ciclev10026104m	stock to scion	scion to stock	Leaves	MRG family protein
Ciclev10026125m	stock to scion	scion to stock	Leaves
Ciclev10026352m	stock to scion	scion to stock	Leaves	20S proteasome subunit PAA2
Ciclev10026595m	stock to scion	scion to stock	Leaves
Ciclev10026692m	stock to scion	scion to stock	Leaves	silencing defective 5
Ciclev10026739m	stock to scion	scion to stock	Leaves	Histone superfamily protein
Ciclev10027261m	stock to scion	scion to stock	Leaves	Disease resistance protein (CC-NBS-LRR class) family
Ciclev10027468m	stock to scion	scion to stock	Leaves	S-locus lectin protein kinase family protein
Ciclev10027469m	stock to scion	scion to stock	Leaves	Tetratricopeptide repeat (TPR)-like superfamily protein
Ciclev10027511m	stock to scion	scion to stock	Leaves	LRR and NB-ARC domains-containing disease resistance protein
Ciclev10027562m	stock to scion	scion to stock	Leaves	Plant protein of unknown function (DUF247)
Ciclev10027704m	stock to scion	scion to stock	Leaves	ubiquitin-activating enzyme 1
Ciclev10027708m	stock to scion	scion to stock	Leaves	extra-large G-protein 1
Ciclev10027800m	stock to scion	scion to stock	Leaves	NB-ARC domain-containing disease resistance protein
Ciclev10027825m	stock to scion	scion to stock	Leaves	dynamin-related protein 3A
Ciclev10027855m	stock to scion	scion to stock	Leaves	camelliol C synthase 1
Ciclev10028103m	stock to scion	scion to stock	Leaves	3-methylcrotonyl-CoA carboxylase
Ciclev10028468m	stock to scion	scion to stock	Leaves	magnesium (Mg) transporter 10
Ciclev10028513m	stock to scion	scion to stock	Leaves	TRICHOME BIREFRINGENCE-LIKE 13
Ciclev10028549m	stock to scion	scion to stock	Leaves	FAD/NAD(P)-binding oxidoreductase family protein
Ciclev10028685m	stock to scion	scion to stock	Leaves	Calcium-binding EF-hand family protein
Ciclev10029224m	stock to scion	scion to stock	Leaves	methionine sulfoxide reductase B 2
Ciclev10030499m	stock to scion	scion to stock	Leaves	Pyruvate phosphate dikinase, PEP/pyruvate binding domain
Ciclev10030617m	stock to scion	scion to stock	Leaves	subunit of exocyst complex 8
Ciclev10030657m	stock to scion	scion to stock	Leaves	Disease resistance protein (CC-NBS-LRR class) family
Ciclev10030974m	stock to scion	scion to stock	Leaves	peptidase M1 family protein
Ciclev10031499m	stock to scion	scion to stock	Leaves	Galactose oxidase/kelch repeat superfamily protein
Ciclev10031527m	stock to scion	scion to stock	Leaves	Protein prenylyltransferase superfamily protein
Ciclev10031530m	stock to scion	scion to stock	Leaves	gametophytic factor 2
Ciclev10031592m	stock to scion	scion to stock	Leaves	HXXXD-type acyl-transferase family protein
Ciclev10031750m	stock to scion	scion to stock	Leaves	Homeodomain-like superfamily protein
Ciclev10031853m	stock to scion	scion to stock	Leaves	dual specificity protein phosphatase (DsPTP1) family protein
Ciclev10032130m	stock to scion	scion to stock	Leaves	ELMO/CED-12 family protein
Ciclev10033243m	stock to scion	scion to stock	Leaves
Ciclev10033903m	stock to scion	scion to stock	Leaves	Protein prenylyltransferase superfamily protein
Ciclev10033966m	stock to scion	scion to stock	Leaves	chromatin remodeling 42
Ciclev10000152m	stock to scion	scion to stock	stems	heteroglycan glucosidase 1
Ciclev10000345m	stock to scion	scion to stock	stems	Leucine-rich repeat protein kinase family protein
Ciclev10000346m	stock to scion	scion to stock	stems	C2 calcium/lipid-binding plant phosphoribosyltransferase family protein
Ciclev10000528m	stock to scion	scion to stock	stems	sulfate transporter 1;3
Ciclev10000710m	stock to scion	scion to stock	stems	phosphatidylserine decarboxylase 2
Ciclev10000960m	stock to scion	scion to stock	stems	Major facilitator superfamily protein
Ciclev10001357m	stock to scion	scion to stock	stems
Ciclev10002028m	stock to scion	scion to stock	stems	nucleotide repair protein, putative
Ciclev10002178m	stock to scion	scion to stock	stems	photosystem I light harvesting complex gene 5
Ciclev10002356m	stock to scion	scion to stock	stems	Cyclophilin-like peptidyl-prolyl cis-trans isomerase family protein
Ciclev10002401m	stock to scion	scion to stock	stems	Ribosomal protein L21
Ciclev10002632m	stock to scion	scion to stock	stems	Cystatin/monellin superfamily protein
Ciclev10002705m	stock to scion	scion to stock	stems	Signal peptidase subunit
Ciclev10002818m	stock to scion	scion to stock	stems
Ciclev10003046m	stock to scion	scion to stock	stems	NADH dehydrogenase (ubiquinone)s
Ciclev10003894m	stock to scion	scion to stock	stems	NB-ARC domain-containing disease resistance protein
Ciclev10003894m	stock to scion	scion to stock	stems	NB-ARC domain-containing disease resistance protein
Ciclev10004042m	stock to scion	scion to stock	stems	NB-ARC domain-containing disease resistance protein
Ciclev10004045m	stock to scion	scion to stock	stems	receptor like protein 15
Ciclev10004059m	stock to scion	scion to stock	stems
Ciclev10004215m	stock to scion	scion to stock	stems	zinc knuckle (CCHC-type) family protein
Ciclev10004438m	stock to scion	scion to stock	stems	DNA GYRASE B2
Ciclev10004551m	stock to scion	scion to stock	stems	protein kinase family protein / peptidoglycan-binding LysM domain-containing protein
Ciclev10004587m	stock to scion	scion to stock	stems	Pentatricopeptide repeat (PPR) superfamily protein
Ciclev10004731m	stock to scion	scion to stock	stems	ADP glucose pyrophosphorylase large subunit 1
Ciclev10005473m	stock to scion	scion to stock	stems	NAD(P)-binding Rossmann-fold superfamily protein
Ciclev10005702m	stock to scion	scion to stock	stems	SEC14 cytosolic factor family protein / phosphoglyceride transfer family protein
Ciclev10005712m	stock to scion	scion to stock	stems
Ciclev10006012m	stock to scion	scion to stock	stems	RNA polymerase Rpb7-like, N-terminal domain
Ciclev10006331m	stock to scion	scion to stock	stems
Ciclev10006435m	stock to scion	scion to stock	stems	FTSH protease 11
Ciclev10007677m	stock to scion	scion to stock	stems	SPOC domain / Transcription elongation factor S-II protein
Ciclev10007779m	stock to scion	scion to stock	stems	S-locus lectin protein kinase family protein
Ciclev10007859m	stock to scion	scion to stock	stems	Tetratricopeptide repeat (TPR)-like superfamily protein
Ciclev10008160m	stock to scion	scion to stock	stems	casein kinase 1-like protein 2
Ciclev10008327m	stock to scion	scion to stock	stems	ATP-dependent caseinolytic (Clp) protease/crotonase family protein
Ciclev10008411m	stock to scion	scion to stock	stems	cytochrome P450, family 71, subfamily B, polypeptide 36
Ciclev10008637m	stock to scion	scion to stock	stems
Ciclev10008642m	stock to scion	scion to stock	stems	polyubiquitin 10
Ciclev10008659m	stock to scion	scion to stock	stems	Nucleotide-diphospho-sugar transferase family protein
Ciclev10008710m	stock to scion	scion to stock	stems	Nitrilase/cyanide hydratase and apolipoprotein N-acyltransferase family protein
Ciclev10008736m	stock to scion	scion to stock	stems	COP9-signalosome 5B
Ciclev10008874m	stock to scion	scion to stock	stems	gibberellin 2-oxidase 8
Ciclev10009449m	stock to scion	scion to stock	stems	PPPDE putative thiol peptidase family protein
Ciclev10009455m	stock to scion	scion to stock	stems
Ciclev10009486m	stock to scion	scion to stock	stems	OTU-like cysteine protease family protein
Ciclev10009664m	stock to scion	scion to stock	stems	Ribosomal protein L31
Ciclev10009817m	stock to scion	scion to stock	stems
Ciclev10009878m	stock to scion	scion to stock	stems	plant natriuretic peptide A
Ciclev10010809m	stock to scion	scion to stock	stems	Auxin efflux carrier family protein
Ciclev10011063m	stock to scion	scion to stock	stems	starch branching enzyme 2.2
Ciclev10011985m	stock to scion	scion to stock	stems	UbiA prenyltransferase family protein
Ciclev10012994m	stock to scion	scion to stock	stems	RNA binding (RRM/RBD/RNP motifs) family protein
Ciclev10012995m	stock to scion	scion to stock	stems
Ciclev10013120m	stock to scion	scion to stock	stems	Defender against death (DAD family) protein
Ciclev10013652m	stock to scion	scion to stock	stems	Leucine-rich repeat protein kinase family protein
Ciclev10013918m	stock to scion	scion to stock	stems	Protein of unknown function DUF106, transmembrane
Ciclev10013989m	stock to scion	scion to stock	stems	NAD(P)-binding Rossmann-fold superfamily protein
Ciclev10014054m	stock to scion	scion to stock	stems	Nucleoporin, Nup133/Nup155-like
Ciclev10014060m	stock to scion	scion to stock	stems	DC1 domain-containing protein
Ciclev10014088m	stock to scion	scion to stock	stems	NB-ARC domain-containing disease resistance protein
Ciclev10014126m	stock to scion	scion to stock	stems	receptor-like kinase in flowers 1
Ciclev10014277m	stock to scion	scion to stock	stems
Ciclev10014863m	stock to scion	scion to stock	stems	cytochrome P450, family 706, subfamily A, polypeptide 4
Ciclev10015249m	stock to scion	scion to stock	stems	HXXXD-type acyl-transferase family protein
Ciclev10015269m	stock to scion	scion to stock	stems	heat shock transcription factor A1D
Ciclev10015312m	stock to scion	scion to stock	stems
Ciclev10015390m	stock to scion	scion to stock	stems
Ciclev10016078m	stock to scion	scion to stock	stems
Ciclev10016134m	stock to scion	scion to stock	stems	glyoxalase I homolog
Ciclev10016186m	stock to scion	scion to stock	stems	5\'-AMP-activated protein kinase beta-2 subunit protein
Ciclev10016570m	stock to scion	scion to stock	stems
Ciclev10016974m	stock to scion	scion to stock	stems	phloem protein 2-A9
Ciclev10017279m	stock to scion	scion to stock	stems
Ciclev10017326m	stock to scion	scion to stock	stems
Ciclev10017424m	stock to scion	scion to stock	stems
Ciclev10017434m	stock to scion	scion to stock	stems	phosphoglucan, water dikinase
Ciclev10018190m	stock to scion	scion to stock	stems	NB-ARC domain-containing disease resistance protein
Ciclev10018492m	stock to scion	scion to stock	stems	LRR and NB-ARC domains-containing disease resistance protein
Ciclev10018507m	stock to scion	scion to stock	stems	LRR and NB-ARC domains-containing disease resistance protein
Ciclev10018622m	stock to scion	scion to stock	stems	nucleotidyltransferases
Ciclev10018677m	stock to scion	scion to stock	stems	BTB/POZ domain-containing protein
Ciclev10018722m	stock to scion	scion to stock	stems	Disease resistance protein (TIR-NBS-LRR class) family
Ciclev10018756m	stock to scion	scion to stock	stems	aspartate kinase-homoserine dehydrogenase ii
Ciclev10018840m	stock to scion	scion to stock	stems	DNA mismatch repair protein MutS, type 2
Ciclev10018921m	stock to scion	scion to stock	stems	Cobalamin-independent synthase family protein
Ciclev10019053m	stock to scion	scion to stock	stems	ferric reduction oxidase 2
Ciclev10019092m	stock to scion	scion to stock	stems	DNAJ heat shock N-terminal domain-containing protein
Ciclev10019321m	stock to scion	scion to stock	stems	Cyclin/Brf1-like TBP-binding protein
Ciclev10019439m	stock to scion	scion to stock	stems	calcineurin B subunit-related
Ciclev10019651m	stock to scion	scion to stock	stems	cytochrome P450, family 76, subfamily C, polypeptide 4
Ciclev10019821m	stock to scion	scion to stock	stems	Protein phosphatase 2A, regulatory subunit PR55
Ciclev10019823m	stock to scion	scion to stock	stems	Tetratricopeptide repeat (TPR)-like superfamily protein
Ciclev10019830m	stock to scion	scion to stock	stems	transducin family protein / WD-40 repeat family protein
Ciclev10020753m	stock to scion	scion to stock	stems	acyl-CoA binding protein 2
Ciclev10020879m	stock to scion	scion to stock	stems	protein serine/threonine kinases;ATP binding;catalytics
Ciclev10021379m	stock to scion	scion to stock	stems	Erythronate-4-phosphate dehydrogenase family protein
Ciclev10021441m	stock to scion	scion to stock	stems	SNARE associated Golgi protein family
Ciclev10021474m	stock to scion	scion to stock	stems	Polynucleotidyl transferase, ribonuclease H-like superfamily protein
Ciclev10021749m	stock to scion	scion to stock	stems	Leucine-rich repeat (LRR) family protein
Ciclev10021801m	stock to scion	scion to stock	stems	VIRB2-interacting protein 2
Ciclev10021817m	stock to scion	scion to stock	stems	Acyl-CoA N-acyltransferases (NAT) superfamily protein
Ciclev10021862m	stock to scion	scion to stock	stems	Dof-type zinc finger DNA-binding family protein
Ciclev10022463m	stock to scion	scion to stock	stems	ubiquitin-conjugating enzyme 5
Ciclev10022588m	stock to scion	scion to stock	stems
Ciclev10022675m	stock to scion	scion to stock	stems	ubiquiting-conjugating enzyme 2
Ciclev10022785m	stock to scion	scion to stock	stems	Small nuclear ribonucleoprotein family protein
Ciclev10023059m	stock to scion	scion to stock	stems	Small nuclear ribonucleoprotein family protein
Ciclev10023418m	stock to scion	scion to stock	stems	disease resistance protein (TIR-NBS-LRR class), putative
Ciclev10023740m	stock to scion	scion to stock	stems	Protein of unknown function (DUF810)
Ciclev10023782m	stock to scion	scion to stock	stems	Phosphorylase superfamily protein
Ciclev10023853m	stock to scion	scion to stock	stems	Leucine-rich repeat transmembrane protein kinase
Ciclev10023982m	stock to scion	scion to stock	stems	disease resistance protein (TIR-NBS-LRR class), putative
Ciclev10024454m	stock to scion	scion to stock	stems	LRR and NB-ARC domains-containing disease resistance protein
Ciclev10024606m	stock to scion	scion to stock	stems	Disease resistance protein (TIR-NBS-LRR class) family
Ciclev10024689m	stock to scion	scion to stock	stems	Tetratricopeptide repeat (TPR)-like superfamily protein
Ciclev10024735m	stock to scion	scion to stock	stems	disease resistance protein (TIR-NBS-LRR class), putative
Ciclev10024842m	stock to scion	scion to stock	stems	Disease resistance protein (CC-NBS-LRR class) family
Ciclev10024905m	stock to scion	scion to stock	stems	Protein kinase superfamily protein
Ciclev10024906m	stock to scion	scion to stock	stems	S-domain-2 5
Ciclev10025008m	stock to scion	scion to stock	stems	Disease resistance protein (CC-NBS-LRR class) family
Ciclev10025107m	stock to scion	scion to stock	stems	Tetratricopeptide repeat (TPR)-like superfamily protein
Ciclev10025411m	stock to scion	scion to stock	stems	aldehyde dehydrogenase 7B4
Ciclev10025625m	stock to scion	scion to stock	stems	Disease resistance protein (CC-NBS-LRR class) family
Ciclev10025693m	stock to scion	scion to stock	stems	Disease resistance protein (CC-NBS-LRR class) family
Ciclev10026168m	stock to scion	scion to stock	stems	transducin family protein / WD-40 repeat family protein
Ciclev10026305m	stock to scion	scion to stock	stems
Ciclev10026315m	stock to scion	scion to stock	stems	Ubiquitin-conjugating enzyme family protein
Ciclev10026551m	stock to scion	scion to stock	stems
Ciclev10026648m	stock to scion	scion to stock	stems	Clathrin adaptor complex small chain family protein
Ciclev10026665m	stock to scion	scion to stock	stems
Ciclev10026838m	stock to scion	scion to stock	stems
Ciclev10027030m	stock to scion	scion to stock	stems	S-locus lectin protein kinase family protein
Ciclev10027172m	stock to scion	scion to stock	stems	LRR and NB-ARC domains-containing disease resistance protein
Ciclev10027317m	stock to scion	scion to stock	stems	silencing defective 5
Ciclev10027601m	stock to scion	scion to stock	stems	NB-ARC domain-containing disease resistance protein
Ciclev10027708m	stock to scion	scion to stock	stems	extra-large G-protein 1
Ciclev10027750m	stock to scion	scion to stock	stems	Argonaute family protein
Ciclev10027866m	stock to scion	scion to stock	stems	Glycosyl hydrolase family protein with chitinase insertion domain
Ciclev10027913m	stock to scion	scion to stock	stems	PHE ammonia lyase 1
Ciclev10028124m	stock to scion	scion to stock	stems	ATP binding;nucleic acid binding;helicases
Ciclev10028321m	stock to scion	scion to stock	stems	Major facilitator superfamily protein
Ciclev10028481m	stock to scion	scion to stock	stems	Pentatricopeptide repeat (PPR) superfamily protein
Ciclev10028543m	stock to scion	scion to stock	stems
Ciclev10028684m	stock to scion	scion to stock	stems	Protein kinase superfamily protein
Ciclev10029248m	stock to scion	scion to stock	stems	vesicle-associated membrane protein 714
Ciclev10029307m	stock to scion	scion to stock	stems	maternal effect embryo arrest 59
Ciclev10029659m	stock to scion	scion to stock	stems	FAD/NAD(P)-binding oxidoreductase family protein
Ciclev10029803m	stock to scion	scion to stock	stems
Ciclev10029847m	stock to scion	scion to stock	stems	Ankyrin repeat family protein
Ciclev10029856m	stock to scion	scion to stock	stems	serine carboxypeptidase-like 51
Ciclev10030495m	stock to scion	scion to stock	stems	glucan synthase-like 7
Ciclev10030665m	stock to scion	scion to stock	stems	Leucine-rich repeat receptor-like protein kinase family protein
Ciclev10031116m	stock to scion	scion to stock	stems	DNA-binding protein with MIZ/SP-RING zinc finger, PHD-finger and SAP domain
Ciclev10031225m	stock to scion	scion to stock	stems	WRKY DNA-binding protein 4
Ciclev10031310m	stock to scion	scion to stock	stems	NPR1-like protein 4
Ciclev10031347m	stock to scion	scion to stock	stems	Minichromosome maintenance (MCM2/3/5) family protein
Ciclev10031457m	stock to scion	scion to stock	stems
Ciclev10031457m	stock to scion	scion to stock	stems
Ciclev10031499m	stock to scion	scion to stock	stems	Galactose oxidase/kelch repeat superfamily protein
Ciclev10031535m	stock to scion	scion to stock	stems	arginine-rich cyclin 1
Ciclev10031641m	stock to scion	scion to stock	stems	Eukaryotic aspartyl protease family protein
Ciclev10031641m	stock to scion	scion to stock	stems	Eukaryotic aspartyl protease family protein
Ciclev10031995m	stock to scion	scion to stock	stems	Amino acid kinase family protein
Ciclev10032099m	stock to scion	scion to stock	stems	Phosphoribosyltransferase family protein
Ciclev10032130m	stock to scion	scion to stock	stems	ELMO/CED-12 family protein
Ciclev10032495m	stock to scion	scion to stock	stems	ADP-ribosylation factor family protein
Ciclev10032680m	stock to scion	scion to stock	stems	Glutathione S-transferase family protein
Ciclev10032846m	stock to scion	scion to stock	stems	Ribosomal protein L12/ ATP-dependent Clp protease adaptor protein ClpS family protein
Ciclev10033377m	stock to scion	scion to stock	stems	lupeol synthase 2

## Sheet: Table S7
Table S7 Confirmation of the identification of mobile transcripts scions and rootstocks
Gene ID	Direction		Annotation
Ciclev10004518m		scion to stock	Ankyrin repeat family protein
Ciclev10000229m		scion to stock	Pentatricopeptide repeat (PPR-like) superfamily protein
Ciclev10011555m	stock to scion		UDP-glucosyl transferase 73C2
Ciclev10005694m		scion to stock
Ciclev10007520m	stock to scion		lectin protein kinase family protein
Ciclev10025166m	stock to scion		Tetratricopeptide repeat (TPR)-like superfamily protein
Ciclev10003865m		scion to stock	NB-ARC domain-containing disease resistance protein
Ciclev10027193m		scion to stock	Tetratricopeptide repeat (TPR)-like superfamily protein
Ciclev10024314m	stock to scion		Leucine-rich repeat transmembrane protein kinase
Ciclev10016835m	stock to scion		phloem protein 2 A5
Ciclev10000345m	stock to scion	scion to stock	Leucine-rich repeat protein kinase family protein
The transmitting genes was confirmed by Sanger sequencing
Before grafting of CC
After grafting of CC
Ciclev10000345m
After grafting of CT
Before grafting of CT
Before grafting of CC
After grafting of CC
Ciclev10003865m
After grafting of CT
Before grafting of CT
Before grafting of CC
After grafting of CC
Ciclev10004518m
After grafting of CT
Before grafting of CT
Before grafting of CC
After grafting of CC
Ciclev10000229m
After grafting of CT
Before grafting of CT
Before grafting of CC
After grafting of CC
Ciclev10005694m
After grafting of CT
Before grafting of CT
Before grafting of CC
After grafting of CC
Ciclev10007520m
After grafting of CT
Before grafting of CT
Before grafting of CC
After grafting of CC
Ciclev10011555m
After grafting of CT
Before grafting of CT
Before grafting of CC
After grafting of CC
Ciclev10025166m
After grafting of CT
Before grafting of CT
Before grafting of CC
After grafting of CC
Ciclev10024314m
After grafting of CT
Before grafting of CT
Before grafting of CC
After grafting of CC
Ciclev10016835m
After grafting of CT
Before grafting of CT
Before grafting of CC
After grafting of CC
Ciclev10027193m
After grafting of CT
Before grafting of CT

## Sheet: Table S8
Table S8. Analysis of the differentially expressed genes of scions.
Tissue type	Gene ID	Before-grafting	After-grafting	log2FoldChange	Regulation	Probability	Description
Stem	Ciclev10028412m	37.7628	18.2624	1.04809	up	0.936647	cation exchanger 1
Stem	Ciclev10026552m	97.1929	48.0358	1.01674	up	0.930472	Lactoylglutathione lyase / glyoxalase I family protein
Stem	Ciclev10016622m	13.1601	5.85125	1.16935	up	0.925698	Tetraspanin family protein
Stem	Ciclev10021785m	11.5625	5.03725	1.19875	up	0.92392	voltage dependent anion channel 3
Stem	Ciclev10005421m	10.9834	4.74037	1.21225	up	0.921995	chitinase-like protein 2
Stem	Ciclev10009963m	8.28746	3.54331	1.22583	up	0.901421	pinoid-binding protein 1
Stem	Ciclev10029838m	9.30591	4.4435	1.06645	up	0.893021
Stem	Ciclev10005136m	7.5985	3.43797	1.14416	up	0.878861
Stem	Ciclev10010422m	7.84812	3.7923	1.04927	up	0.87361	Calcium-binding EF-hand family protein
Stem	Ciclev10003051m	5.31196	2.33667	1.18479	up	0.83562
Stem	Ciclev10007321m	5.73132	2.72931	1.07033	up	0.830677	Cellulose synthase family protein
Stem	Ciclev10020746m	5.01241	2.39413	1.06601	up	0.806885	nodulin MtN21 /EamA-like transporter family protein
Stem	Ciclev10031134m	5.25205	2.59523	1.01702	up	0.801133	Laccase/Diphenol oxidase family protein
Stem	Ciclev10025820m	19.3807	376.366	-4.27945	down	0.999861	PQ-loop repeat family protein / transmembrane family protein
Stem	Ciclev10022906m	22.4061	217.875	-3.28154	down	0.99722	Serine protease inhibitor, potato inhibitor I-type family protein
Stem	Ciclev10004717m	5.6814	28.4231	-2.32274	down	0.983969	cytochrome P450, family 706, subfamily A, polypeptide 4
Stem	Ciclev10026181m	16.1256	71.5844	-2.15029	down	0.981559	Pathogenesis-related thaumatin superfamily protein
Stem	Ciclev10021176m	1.76732	10.6012	-2.58459	down	0.977448	Tetratricopeptide repeat (TPR)-like superfamily protein
Stem	Ciclev10008176m	77.3329	287.372	-1.89376	down	0.970095	O-Glycosyl hydrolases family 17 protein
Stem	Ciclev10028964m	119.249	435.559	-1.86888	down	0.970033	basic chitinase
Stem	Ciclev10022951m	26.9891	94.1754	-1.80297	down	0.966391	response to low sulfur 2
Stem	Ciclev10022911m	7.56854	26.8142	-1.82491	down	0.965944	Kunitz family trypsin and protease inhibitor protein
Stem	Ciclev10022909m	29.036	95.8226	-1.72252	down	0.964689	Serine protease inhibitor, potato inhibitor I-type family protein
Stem	Ciclev10028688m	8.24752	28.4039	-1.78406	down	0.964158	2-oxoglutarate (2OG) and Fe(II)-dependent oxygenase superfamily protein
Stem	Ciclev10004341m	14.7776	47.1356	-1.6734	down	0.963542	sucrose synthase 2
Stem	Ciclev10022211m	333.974	1014.32	-1.60271	down	0.962395	Kunitz family trypsin and protease inhibitor protein
Stem	Ciclev10013139m	40.988	124.179	-1.59914	down	0.962249	lipid transfer protein 1
Stem	Ciclev10003896m	39.8397	119.524	-1.58503	down	0.960963	Integrase-type DNA-binding superfamily protein
Stem	Ciclev10005225m	7.57853	23.1081	-1.60841	down	0.958922	2-oxoglutarate (2OG) and Fe(II)-dependent oxygenase superfamily protein
Stem	Ciclev10032218m	14.5979	42.7304	-1.5495	down	0.958722	senescence-associated gene 29
Stem	Ciclev10002041m	5.8811	18.0038	-1.61415	down	0.956243	Uncharacterised protein family (UPF0114)
Stem	Ciclev10009700m	16.2354	43.7168	-1.42904	down	0.955873	myb domain protein 82
Stem	Ciclev10028904m	50.204	132.644	-1.40169	down	0.955742	NmrA-like negative transcriptional regulator family protein
Stem	Ciclev10005146m	15.3967	41.2652	-1.4223	down	0.95555	S-adenosylmethionine synthetase family protein
Stem	Ciclev10022084m	6.12074	18.2241	-1.57407	down	0.954795	Rubber elongation factor protein (REF)
Stem	Ciclev10011143m	130.842	333.052	-1.34792	down	0.953725	ABC-2 type transporter family protein
Stem	Ciclev10020496m	4.1637	13.0241	-1.64524	down	0.951762	Transducin/WD40 repeat-like superfamily protein
Stem	Ciclev10001212m	5.05235	15.0926	-1.57881	down	0.951546	Eukaryotic aspartyl protease family protein
Stem	Ciclev10031586m	22.0866	53.8966	-1.28703	down	0.951184	Transmembrane amino acid transporter family protein
Stem	Ciclev10012953m	31.4025	74.5436	-1.24721	down	0.95033	lipid transfer protein 1
Stem	Ciclev10018374m	26.5997	61.2514	-1.20333	down	0.948551	Oxidoreductase, zinc-binding dehydrogenase family protein
Stem	Ciclev10029528m	11.4726	27.6857	-1.27094	down	0.948351	pathogenesis-related 4
Stem	Ciclev10005365m	14.2484	32.8187	-1.20372	down	0.946795	Tetratricopeptide repeat (TPR)-like superfamily protein
Stem	Ciclev10021039m	6.94948	17.6399	-1.34387	down	0.945548	Protein of unknown function (DUF789)
Stem	Ciclev10031949m	8.92649	21.0109	-1.23497	down	0.9439	O-methyltransferase 1
Stem	Ciclev10006614m	70.5033	155.484	-1.14101	down	0.941005	Copper amine oxidase family protein
Stem	Ciclev10000869m	179.778	384.334	-1.09615	down	0.939904	Protein of unknown function, DUF647
Stem	Ciclev10015421m	11.0433	24.286	-1.13696	down	0.936101	Myzus persicae-induced lipase 1
Stem	Ciclev10029285m	9.75523	21.2982	-1.12648	down	0.934168	dehydrin LEA
Stem	Ciclev10026128m	25.4814	52.1728	-1.03385	down	0.929895	uncoupling protein 5
Stem	Ciclev10003746m	9.83511	20.2926	-1.04494	down	0.92616	LOB domain-containing protein 39
Stem	Ciclev10024343m	2.10681	7.27815	-1.78851	down	0.925637	Nodulin MtN3 family protein
Stem	Ciclev10021897m	56.7741	114.353	-1.01019	down	0.923104	expansin A1
Stem	Ciclev10019818m	1.10832	5.28623	-2.25386	down	0.922942	DHHC-type zinc finger family protein
Stem	Ciclev10031033m	25.0321	50.4682	-1.0116	down	0.921964	Plant protein of unknown function (DUF828)
Stem	Ciclev10029683m	6.94948	14.5276	-1.06382	down	0.92114	PHYTOSULFOKINE 3 PRECURSOR
Stem	Ciclev10031291m	7.36885	15.1979	-1.04436	down	0.918076	DA1-related protein 2
Stem	Ciclev10031952m	3.6345	8.64759	-1.25054	down	0.907142	O-methyltransferase 1
Stem	Ciclev10016018m	0.269592	3.58162	-3.73176	down	0.90598	Protein of unknown function (DUF506)
Stem	Ciclev10023822m	4.24358	9.02107	-1.08802	down	0.891897	Serine protease inhibitor, potato inhibitor I-type family protein
Stem	Ciclev10029695m	5.63148	11.2811	-1.00233	down	0.888909	Gibberellin-regulated family protein
Stem	Ciclev10031131m	2.43631	6.43542	-1.40133	down	0.888848	Transmembrane amino acid transporter family protein
Stem	Ciclev10025388m	2.41634	6.3588	-1.39593	down	0.886892	Cytochrome P450 superfamily protein
Stem	Ciclev10023188m	1.7174	5.27666	-1.6194	down	0.880755
Stem	Ciclev10004293m	2.94554	6.75144	-1.19666	down	0.87592	Leucine-rich repeat protein kinase family protein
Stem	Ciclev10025480m	2.95553	6.70356	-1.18151	down	0.870038	MATE efflux family protein
Stem	Ciclev10005297m	1.78729	4.8936	-1.45312	down	0.8545	O-methyltransferase family protein
Stem	Ciclev10012905m	0.169743	2.32709	-3.7771	down	0.827058	PEBP (phosphatidylethanolamine-binding protein) family protein
Stem	Ciclev10006992m	0.848715	3.27517	-1.94822	down	0.823639	ATP binding cassette subfamily B19
Stem	Ciclev10032092m	1.83722	4.34774	-1.24274	down	0.80968	Homocysteine S-methyltransferase family protein
Stem	Ciclev10017395m	0.459305	2.51862	-2.45511	down	0.805545
Leaf	Ciclev10020515m	1589.85	2.88686	9.10517	up	0.999699	GDSL-like Lipase/Acylhydrolase superfamily protein
Leaf	Ciclev10012100m	1533.13	8.15011	7.55544	up	0.999584	Pollen Ole e 1 allergen and extensin family protein
Leaf	Ciclev10032524m	1128.28	3.69659	8.25371	up	0.999399	expansin A8
Leaf	Ciclev10032548m	1093.38	5.35126	7.6747	up	0.999352	expansin A1
Leaf	Ciclev10001212m	1027.3	4.27749	7.90787	up	0.999306	Eukaryotic aspartyl protease family protein
Leaf	Ciclev10028101m	1286.39	23.887	5.75096	up	0.99889	proline-rich protein 2
Leaf	Ciclev10032973m	666.254	1.70747	8.60806	up	0.998867	MLP-like protein 423
Leaf	Ciclev10009892m	675.316	3.25652	7.69609	up	0.998751	Bifunctional inhibitor/lipid-transfer protein/seed storage 2S albumin superfamily protein
Leaf	Ciclev10009567m	644.834	2.62282	7.94166	up	0.998705	Bifunctional inhibitor/lipid-transfer protein/seed storage 2S albumin superfamily protein
Leaf	Ciclev10020640m	478.923	0.704113	9.40977	up	0.998427	GDSL-like Lipase/Acylhydrolase superfamily protein
Leaf	Ciclev10031429m	427.388	0.862538	8.95274	up	0.998173	Pectate lyase family protein
Leaf	Ciclev10000783m	305.721	1.58425	7.59227	up	0.997132	SKU5 similar 5
Leaf	Ciclev10002169m	304.371	1.47864	7.68542	up	0.997132	Protein of unknown function (DUF833)
Leaf	Ciclev10005992m	588.531	21.0002	4.80865	up	0.996924
Leaf	Ciclev10023723m	453.436	14.1351	5.00355	up	0.996877	Plant invertase/pectin methylesterase inhibitor superfamily
Leaf	Ciclev10008711m	300.567	4.17187	6.17085	up	0.996785	Protein of unknown function, DUF642
Leaf	Ciclev10016684m	311.978	5.14002	5.92353	up	0.996715	Plant invertase/pectin methylesterase inhibitor superfamily protein
Leaf	Ciclev10031286m	395.135	12.1107	5.02799	up	0.996669	cytochrome P450, family 77, subfamily A, polypeptide 4
Leaf	Ciclev10020423m	258.603	5.79133	5.4807	up	0.995651	Pectin lyase-like superfamily protein
Leaf	Ciclev10012953m	737.631	37.4412	4.3002	up	0.995513	lipid transfer protein 1
Leaf	Ciclev10025184m	214.956	1.07377	7.64521	up	0.99542	Glucose-methanol-choline (GMC) oxidoreductase family protein
Leaf	Ciclev10017274m	207.016	0.704113	8.19972	up	0.995235	Bifunctional inhibitor/lipid-transfer protein/seed storage 2S albumin superfamily protein
Leaf	Ciclev10019301m	435.259	21.8979	4.31301	up	0.99468	glycosyl hydrolase 9C2
Leaf	Ciclev10015449m	203.527	3.96063	5.68335	up	0.994564	fatty acyl-ACP thioesterases B
Leaf	Ciclev10019616m	335.555	14.9272	4.49053	up	0.994564	cytochrome P450, family 86, subfamily A, polypeptide 8
Leaf	Ciclev10004783m	187.383	3.0981	5.91847	up	0.994148	Pectin lyase-like superfamily protein
Leaf	Ciclev10015707m	169.346	2.00672	6.39899	up	0.993685	GDSL-like Lipase/Acylhydrolase superfamily protein
Leaf	Ciclev10012865m	164.666	0.334454	8.94352	up	0.993662
Leaf	Ciclev10027967m	287.596	14.0823	4.35209	up	0.993616	long-chain acyl-CoA synthetase 2
Leaf	Ciclev10019376m	1044.74	66.9963	3.96291	up	0.993361	pectin methylesterase PCR fragment F
Leaf	Ciclev10006243m	152.852	0.24644	9.27668	up	0.992968	Gibberellin-regulated family protein
Leaf	Ciclev10004899m	151.046	0.404865	8.54333	up	0.992829	Pectin lyase-like superfamily protein
Leaf	Ciclev10007470m	202.037	9.25908	4.44761	up	0.992043	PA-domain containing subtilase family protein
Leaf	Ciclev10020328m	152.256	3.53817	5.42735	up	0.991974	FASCICLIN-like arabinogalactan-protein 10
Leaf	Ciclev10015634m	197.831	9.80477	4.33464	up	0.991465	TRICHOME BIREFRINGENCE-LIKE 39
Leaf	Ciclev10026322m	265.194	16.9163	3.97056	up	0.990863	arabinogalactan protein 18
Leaf	Ciclev10005968m	420.938	29.96	3.8125	up	0.990771	Plant invertase/pectin methylesterase inhibitor superfamily protein
Leaf	Ciclev10017219m	115.287	0.93295	6.94922	up	0.990586	cell wall protein precursor, putative
Leaf	Ciclev10031896m	122.965	2.76364	5.47553	up	0.990493	Leucine-rich repeat (LRR) family protein
Leaf	Ciclev10019427m	661.416	52.0867	3.66657	up	0.990424	Glucose-methanol-choline (GMC) oxidoreductase family protein
Leaf	Ciclev10022800m	111.624	0.880141	6.98669	up	0.990331	arabinogalactan protein 26
Leaf	Ciclev10011536m	579.188	44.3415	3.7073	up	0.990331	glycerol-3-phosphate acyltransferase 6
Leaf	Ciclev10012969m	165.104	7.55161	4.45045	up	0.990169
Leaf	Ciclev10009569m	252.363	17.6028	3.84162	up	0.989869	CAP (Cysteine-rich secretory proteins, Antigen 5, and Pathogenesis-related 1 protein) superfamily protein
Leaf	Ciclev10022835m	436.451	35.1528	3.63411	up	0.989475	Bifunctional inhibitor/lipid-transfer protein/seed storage 2S albumin superfamily protein
Leaf	Ciclev10019855m	99.8268	0.616099	7.34012	up	0.989198	3-ketoacyl-acyl carrier protein synthase I
Leaf	Ciclev10014970m	92.675	0.316851	8.19223	up	0.988434	cytochrome P450, family 77, subfamily B, polypeptide 1
Leaf	Ciclev10015728m	91.3253	0.0704113	10.341	up	0.988342	GDSL-like Lipase/Acylhydrolase superfamily protein
Leaf	Ciclev10029094m	192.589	13.519	3.83247	up	0.988273	expansin A4
Leaf	Ciclev10015086m	186.787	12.7268	3.87545	up	0.988203	O-Glycosyl hydrolases family 17 protein
Leaf	Ciclev10005421m	111.624	4.57673	4.60818	up	0.988041	chitinase-like protein 2
Leaf	Ciclev10028106m	692.53	61.8211	3.4857	up	0.987995	plasma membrane intrinsic protein 1A
Leaf	Ciclev10016019m	91.15	1.07377	6.40748	up	0.987879	strictosidine synthase-like 4
Leaf	Ciclev10011613m	323.127	26.8619	3.58847	up	0.987671	Eukaryotic aspartyl protease family protein
Leaf	Ciclev10025271m	95.1466	2.58761	5.20046	up	0.987417	Plant invertase/pectin methylesterase inhibitor superfamily
Leaf	Ciclev10007321m	92.9379	2.39398	5.27878	up	0.987209	Cellulose synthase family protein
Leaf	Ciclev10000849m	104.227	4.43591	4.55435	up	0.986931	glycosyl hydrolase 9B7
Leaf	Ciclev10015614m	106.61	5.35126	4.31633	up	0.986353	fatty acid desaturase 2
Leaf	Ciclev10030947m	89.0816	3.22132	4.7894	up	0.985867	polygalacturonase 2
Leaf	Ciclev10017244m	76.4959	0.598496	6.9979	up	0.985427	Gibberellin-regulated family protein
Leaf	Ciclev10001552m	134.078	9.3823	3.83699	up	0.985335	Tubulin/FtsZ family protein
Leaf	Ciclev10029196m	277.762	25.3305	3.4549	up	0.985335	copper/zinc superoxide dismutase 2
Leaf	Ciclev10004997m	74.4099	0.0880141	9.72354	up	0.985219	HXXXD-type acyl-transferase family protein
Leaf	Ciclev10017839m	97.1624	4.89358	4.31143	up	0.985173	Subtilisin-like serine endopeptidase family protein
Leaf	Ciclev10031220m	75.6545	2.25316	5.0694	up	0.984016	Pectin lyase-like superfamily protein
Leaf	Ciclev10019941m	92.4296	4.9816	4.21367	up	0.983947	Pectin lyase-like superfamily protein
Leaf	Ciclev10018639m	75.1286	2.41159	4.96131	up	0.983785	cellulose synthase A4
Leaf	Ciclev10032019m	68.6955	0.281645	7.93019	up	0.983785	Pollen Ole e 1 allergen and extensin family protein
Leaf	Ciclev10019597m	135.621	10.0512	3.75414	up	0.983646	Pectin lyase-like superfamily protein
Leaf	Ciclev10000260m	661.153	68.827	3.26394	up	0.983531	beta-galactosidase 3
Leaf	Ciclev10011455m	72.2364	1.9011	5.24782	up	0.983461	Nucleotide-diphospho-sugar transferases superfamily protein
Leaf	Ciclev10028242m	1130.73	130.437	3.11583	up	0.982791	Leucine-rich repeat (LRR) family protein
Leaf	Ciclev10015770m	407.002	42.5636	3.25734	up	0.982675	GDSL-like Lipase/Acylhydrolase superfamily protein
Leaf	Ciclev10028988m	65.663	0.739319	6.47274	up	0.982467	FASCICLIN-like arabinogalactan-protein 11
Leaf	Ciclev10001946m	97.8986	6.46024	3.92163	up	0.98242	NmrA-like negative transcriptional regulator family protein
Leaf	Ciclev10028164m	160.739	14.1527	3.50558	up	0.98212	cellulose synthase-like A02
Leaf	Ciclev10012611m	65.7156	1.46103	5.49117	up	0.98175	expansin A5
Leaf	Ciclev10028716m	69.607	2.85166	4.60936	up	0.981194	Pathogenesis-related thaumatin superfamily protein
Leaf	Ciclev10000358m	147.838	13.5542	3.44721	up	0.981009	Protein kinase protein with adenine nucleotide alpha hydrolases-like domain
Leaf	Ciclev10022791m	61.4737	0.756921	6.34368	up	0.980917	PHD finger protein
Leaf	Ciclev10001416m	101.808	7.76284	3.71311	up	0.980662	CYCLIN D3;1
Leaf	Ciclev10031881m	82.8413	5.24564	3.98116	up	0.980501	Protein of unknown function, DUF642
Leaf	Ciclev10031082m	86.7327	5.79133	3.90461	up	0.980477	Plant protein of unknown function (DUF827)
Leaf	Ciclev10018481m	58.2834	0.24644	7.88571	up	0.979899	multidrug resistance-associated protein 9
Leaf	Ciclev10004977m	272.293	31.333	3.1194	up	0.979737	HXXXD-type acyl-transferase family protein
Leaf	Ciclev10025395m	88.398	6.33702	3.80214	up	0.979575	Eukaryotic aspartyl protease family protein
Leaf	Ciclev10010749m	281.811	33.463	3.07409	up	0.979506	S-adenosyl-L-methionine-dependent methyltransferases superfamily protein
Leaf	Ciclev10025342m	95.8652	7.65723	3.64611	up	0.979413	3-deoxy-D-arabino-heptulosonate 7-phosphate synthase 1
Leaf	Ciclev10014155m	61.0004	1.8835	5.01733	up	0.979344	cellulose synthase family protein
Leaf	Ciclev10025238m	646.411	81.7475	2.98321	up	0.979228	pectin methylesterase 3
Leaf	Ciclev10020360m	90.7994	6.77709	3.74395	up	0.979205	basic helix-loop-helix (bHLH) DNA-binding superfamily protein
Leaf	Ciclev10004905m	58.336	1.10898	5.71708	up	0.979159	Exostosin family protein
Leaf	Ciclev10011400m	62.1397	2.39398	4.69803	up	0.978951	Laccase/Diphenol oxidase family protein
Leaf	Ciclev10033422m	127.54	12.9029	3.30518	up	0.977447	alpha-xylosidase 1
Leaf	Ciclev10015771m	55.2509	1.47864	5.22366	up	0.977401	GDSL-like Lipase/Acylhydrolase superfamily protein
Leaf	Ciclev10019410m	188.645	22.2148	3.08609	up	0.977147	Cupredoxin superfamily protein
Leaf	Ciclev10021502m	768.517	102.202	2.91065	up	0.976638	plasma membrane intrinsic protein 1B
Leaf	Ciclev10000103m	594.911	77.8397	2.9341	up	0.976522	cellulose synthase A9
Leaf	Ciclev10020570m	507.986	66.0282	2.94363	up	0.976268	GDSL-like Lipase/Acylhydrolase superfamily protein
Leaf	Ciclev10024881m	160.126	18.3597	3.12459	up	0.976059	beta-galactosidase 3
Leaf	Ciclev10017722m	61.0179	3.46776	4.13716	up	0.975689	cytochrome P450, family 706, subfamily A, polypeptide 4
Leaf	Ciclev10026210m	1151.15	166.998	2.78518	up	0.975597	xyloglucan endotransglucosylase/hydrolase 6
Leaf	Ciclev10019884m	53.761	1.9011	4.82165	up	0.975527	IQ-domain 21
Leaf	Ciclev10015743m	55.619	2.39398	4.53809	up	0.975504	TRICHOME BIREFRINGENCE-LIKE 43
Leaf	Ciclev10018959m	54.4796	2.20035	4.62991	up	0.975319	beta-xylosidase 2
Leaf	Ciclev10026481m	2575.76	381.752	2.75429	up	0.974995	germin-like protein 1
Leaf	Ciclev10030884m	51.2193	1.46103	5.13163	up	0.974949	ARM repeat superfamily protein
Leaf	Ciclev10014884m	49.0983	1.02096	5.58767	up	0.974602	glycosyl hydrolase 9B8
Leaf	Ciclev10007249m	279.41	36.4202	2.93957	up	0.974417	pleiotropic drug resistance 4
Leaf	Ciclev10009498m	48.9405	1.2498	5.29126	up	0.974093
Leaf	Ciclev10008218m	133.202	16.3354	3.02754	up	0.974047	FASCICLIN-like arabinogalactan 1
Leaf	Ciclev10007510m	78.8623	7.25236	3.44281	up	0.973931	Subtilase family protein
Leaf	Ciclev10007397m	48.1517	1.12658	5.41757	up	0.973839	Leucine-rich receptor-like protein kinase family protein
Leaf	Ciclev10011238m	52.8319	2.34118	4.49611	up	0.973793	Leucine-rich repeat protein kinase family protein
Leaf	Ciclev10030843m	54.6725	2.79885	4.28791	up	0.973746
Leaf	Ciclev10004541m	250.207	34.1319	2.87393	up	0.973284	Major facilitator superfamily protein
Leaf	Ciclev10016200m	582.904	90.5137	2.68705	up	0.973145
Leaf	Ciclev10029632m	45.3997	0.56329	6.33266	up	0.97289	hydroxyproline-rich glycoprotein family protein
Leaf	Ciclev10030744m	51.8678	2.4996	4.37507	up	0.972821	potassium transporter 2
Leaf	Ciclev10002876m	49.1158	2.14754	4.51543	up	0.971942
Leaf	Ciclev10022307m	455.312	74.7768	2.60619	up	0.97178
Leaf	Ciclev10027716m	54.9705	3.55577	3.95042	up	0.971132	Kinesin motor family protein
Leaf	Ciclev10015924m	57.3544	4.10146	3.80569	up	0.971086	Peroxidase superfamily protein
Leaf	Ciclev10009639m	200.25	28.3581	2.81996	up	0.970924	Protein of unknown function (DUF1218)
Leaf	Ciclev10029568m	45.0842	1.49624	4.91321	up	0.970878
Leaf	Ciclev10018178m	86.0841	9.3295	3.20588	up	0.970693	lipoxygenase 2
Leaf	Ciclev10025939m	83.5951	8.67819	3.26795	up	0.970647	cinnamyl alcohol dehydrogenase 9
Leaf	Ciclev10016270m	43.2962	1.00336	5.43133	up	0.970508	expansin B3
Leaf	Ciclev10028674m	295.887	48.4958	2.60911	up	0.970369	Pectinacetylesterase family protein
Leaf	Ciclev10015478m	50.9038	3.23892	3.97419	up	0.96956
Leaf	Ciclev10004709m	83.1218	9.71676	3.09668	up	0.968611	Heavy metal transport/detoxification superfamily protein
Leaf	Ciclev10012518m	184.561	27.5836	2.74222	up	0.968565	expansin A4
Leaf	Ciclev10014531m	41.2629	1.14418	5.17245	up	0.968426	Cellulose-synthase-like C4
Leaf	Ciclev10007940m	55.1808	4.47112	3.62546	up	0.968218	Plant invertase/pectin methylesterase inhibitor superfamily
Leaf	Ciclev10007641m	41.1402	1.2674	5.0206	up	0.96801	Cellulose-synthase-like C5
Leaf	Ciclev10016312m	72.7272	7.81565	3.21806	up	0.96757	FASCICLIN-like arabinoogalactan 7
Leaf	Ciclev10018577m	50.1851	3.59098	3.80481	up	0.96727	Myosin heavy chain-related protein
Leaf	Ciclev10031364m	88.8011	10.9842	3.01515	up	0.967154	Eukaryotic aspartyl protease family protein
Leaf	Ciclev10004381m	37.8974	0.281645	7.07207	up	0.966714	subtilase 1.3
Leaf	Ciclev10001438m	58.7742	5.6153	3.38775	up	0.966599	Walls Are Thin 1
Leaf	Ciclev10024934m	75.2689	9.08306	3.0508	up	0.966252	Subtilase family protein
Leaf	Ciclev10011289m	139.442	21.6515	2.68713	up	0.966229	receptor-like kinase 1
Leaf	Ciclev10027805m	137.461	21.3522	2.68657	up	0.966021	beta-galactosidase 8
Leaf	Ciclev10015053m	37.7221	0.792127	5.57353	up	0.96572	Sec14p-like phosphatidylinositol transfer family protein
Leaf	Ciclev10014658m	57.5121	5.65051	3.34741	up	0.965604	CTP synthase family protein
Leaf	Ciclev10032535m	35.9867	0.158425	7.82752	up	0.965165	RNA-binding (RRM/RBD/RNP motifs) family protein
Leaf	Ciclev10015097m	97.8811	13.4838	2.85981	up	0.964887	FASCICLIN-like arabinogalactan protein 17 precursor
Leaf	Ciclev10031134m	37.6169	1.14418	5.03899	up	0.964818	Laccase/Diphenol oxidase family protein
Leaf	Ciclev10005954m	50.6058	4.29509	3.55854	up	0.964702
Leaf	Ciclev10011703m	116.83	17.8141	2.71332	up	0.964679	FASCICLIN-like arabinogalactan protein 17 precursor
Leaf	Ciclev10025217m	38.283	1.44343	4.72913	up	0.964586	Sec14p-like phosphatidylinositol transfer family protein
Leaf	Ciclev10016355m	95.5848	13.2197	2.85409	up	0.964425	BCL-2-associated athanogene 2
Leaf	Ciclev10019134m	246	41.4722	2.56844	up	0.964332	Glycosyl hydrolases family 32 protein
Leaf	Ciclev10004465m	51.4647	4.52393	3.50794	up	0.964054	Glycosyl hydrolases family 32 protein
Leaf	Ciclev10004276m	45.277	3.25652	3.79737	up	0.964031	Leucine-rich repeat receptor-like protein kinase family protein
Leaf	Ciclev10030625m	39.808	2.04193	4.28506	up	0.963777	Leucine-rich repeat protein kinase family protein
Leaf	Ciclev10013114m	34.7422	0.387262	6.48723	up	0.963175	lipid transfer protein 6
Leaf	Ciclev10026759m	34.4091	0.316851	6.76284	up	0.962944	ralf-like 34
Leaf	Ciclev10004258m	36.0568	1.19699	4.91279	up	0.962782
Leaf	Ciclev10016407m	84.191	11.7235	2.84427	up	0.962759	FASCICLIN-like arabinogalactan 6
Leaf	Ciclev10025703m	89.8003	12.9029	2.79903	up	0.962643	PLAC8 family protein
Leaf	Ciclev10020164m	38.4933	2.02432	4.2491	up	0.962481	beta-6 tubulin
Leaf	Ciclev10025631m	48.7477	4.33029	3.4928	up	0.962435	Glycosyl hydrolase superfamily protein
Leaf	Ciclev10002743m	414.277	70.6401	2.55203	up	0.962227	Pollen Ole e 1 allergen and extensin family protein
Leaf	Ciclev10004929m	35.2154	1.09137	5.01199	up	0.961996	6-phosphogluconate dehydrogenase family protein
Leaf	Ciclev10024886m	66.7849	8.41415	2.98863	up	0.961256	beta galactosidase 1
Leaf	Ciclev10005946m	47.5032	4.31269	3.46136	up	0.961047	Plant invertase/pectin methylesterase inhibitor superfamily protein
Leaf	Ciclev10007964m	385.845	70.2881	2.45667	up	0.960654	Plant invertase/pectin methylesterase inhibitor superfamily
Leaf	Ciclev10002405m	58.8619	6.93551	3.08526	up	0.960608	Putative lysine decarboxylase family protein
Leaf	Ciclev10020875m	49.9747	5.0168	3.31636	up	0.960076	O-methyltransferase 1
Leaf	Ciclev10015623m	38.5109	2.58761	3.89557	up	0.959405	TRICHOME BIREFRINGENCE-LIKE 36
Leaf	Ciclev10022842m	70.2381	9.71676	2.85371	up	0.958942
Leaf	Ciclev10014808m	41.2278	3.34454	3.62374	up	0.95885	beta-hexosaminidase 3
Leaf	Ciclev10012588m	32.8315	0.950552	5.11017	up	0.958757	FASCICLIN-like arabinogalactan-protein 11
Leaf	Ciclev10009420m	35.9867	2.11234	4.09055	up	0.958133	early nodulin-like protein 9
Leaf	Ciclev10033132m	111.799	18.5358	2.59252	up	0.95811	Photosystem II 5 kD protein
Leaf	Ciclev10020715m	72.8323	10.8785	2.74309	up	0.957254	galacturonosyltransferase-like 7
Leaf	Ciclev10004130m	177.76	31.245	2.50823	up	0.957092	Kinase interacting (KIP1-like) family protein
Leaf	Ciclev10002591m	30.395	0.528085	5.84692	up	0.956514	Cupredoxin superfamily protein
Leaf	Ciclev10004238m	160.091	28.4814	2.4908	up	0.956282	Leucine-rich receptor-like protein kinase family protein
Leaf	Ciclev10015469m	156.568	27.4956	2.50951	up	0.956259	FASCICLIN-like arabinogalactan 2
Leaf	Ciclev10029408m	36.6002	2.62282	3.80266	up	0.956074
Leaf	Ciclev10014015m	188.312	35.9098	2.39068	up	0.955565	glucan synthase-like 12
Leaf	Ciclev10016096m	29.9743	0.668907	5.48578	up	0.955473
Leaf	Ciclev10031951m	160.284	29.7664	2.42887	up	0.955218	O-methyltransferase 1
Leaf	Ciclev10018670m	35.0402	2.34118	3.9037	up	0.955103	P-loop nucleoside triphosphate hydrolases superfamily protein with CH (Calponin Homology) domain
Leaf	Ciclev10026351m	124.35	21.3698	2.54075	up	0.954779	delta tonoplast integral protein
Leaf	Ciclev10032018m	145.226	27.3548	2.40844	up	0.954177	GATA transcription factor 9
Leaf	Ciclev10011673m	46.3638	5.38646	3.10559	up	0.9539	Protein kinase superfamily protein
Leaf	Ciclev10032302m	802.155	181.362	2.14501	up	0.953761	plasma membrane intrinsic protein 2;5
Leaf	Ciclev10011766m	151.922	29.8896	2.34562	up	0.953599	Bifunctional inhibitor/lipid-transfer protein/seed storage 2S albumin superfamily protein
Leaf	Ciclev10007806m	29.2381	0.844935	5.11287	up	0.95346	pectin methylesterase 3
Leaf	Ciclev10020247m	29.6588	1.07377	4.7877	up	0.953368	D-mannose binding lectin protein with Apple-like carbohydrate-binding domain
Leaf	Ciclev10028711m	27.6956	0.0352056	9.61963	up	0.953183	Pollen Ole e 1 allergen and extensin family protein
Leaf	Ciclev10020787m	27.8358	0.211234	7.04196	up	0.953044	Pectin lyase-like superfamily protein
Leaf	Ciclev10025455m	127.575	24.0631	2.40645	up	0.952998	MATE efflux family protein
Leaf	Ciclev10014518m	28.8525	1.02096	4.82069	up	0.952049	Actin binding Calponin homology (CH) domain-containing protein
Leaf	Ciclev10018574m	28.0461	0.651304	5.42833	up	0.951911	cellulose synthase-like D5
Leaf	Ciclev10000352m	157.076	31.3682	2.32409	up	0.951864	Glycosyl hydrolase family protein
Leaf	Ciclev10025232m	119.897	23.2709	2.3652	up	0.95161	pectin methylesterase 1
Leaf	Ciclev10030821m	304.09	67.9293	2.16239	up	0.951517	PHE ammonia lyase 1
Leaf	Ciclev10028764m	32.1128	2.07713	3.95048	up	0.951471	lysophosphatidyl acyltransferase 5
Leaf	Ciclev10032279m	61.0179	9.80477	2.63768	up	0.951448	Homeobox-leucine zipper protein family
Leaf	Ciclev10018601m	60.3343	9.61114	2.6502	up	0.951332
Leaf	Ciclev10023918m	33.4976	2.482	3.75448	up	0.951032	HMG (high mobility group) box protein
Leaf	Ciclev10021778m	35.7413	3.08049	3.53636	up	0.950754	NC domain-containing protein-related
Leaf	Ciclev10007178m	26.5036	0.0528085	8.9712	up	0.950361	Plant invertase/pectin methylesterase inhibitor superfamily protein
Leaf	Ciclev10024766m	330.682	76.9067	2.10426	up	0.950106	cellulose synthase 6
Leaf	Ciclev10029633m	40.7896	4.57673	3.15581	up	0.950014	SAUR-like auxin-responsive protein family
Leaf	Ciclev10010708m	163.158	34.1847	2.25485	up	0.949505	Leucine-rich repeat (LRR) family protein
Leaf	Ciclev10014352m	27.0996	0.68651	5.30285	up	0.949436	Calcium-dependent lipid-binding (CaLB domain) plant phosphoribosyltransferase family protein
Leaf	Ciclev10004832m	44.5408	5.70331	2.96525	up	0.949204	alpha-L-fucosidase 1
Leaf	Ciclev10004870m	98.6173	19.0639	2.371	up	0.94895	HXXXD-type acyl-transferase family protein
Leaf	Ciclev10004736m	89.0115	16.3178	2.44754	up	0.948904	3-ketoacyl-CoA synthase 2
Leaf	Ciclev10024977m	26.9769	0.80973	5.05814	up	0.94888
Leaf	Ciclev10028046m	38.8089	4.18947	3.21155	up	0.948765	Reticulon family protein
Leaf	Ciclev10024951m	245.123	57.1916	2.09963	up	0.94858	Subtilase family protein
Leaf	Ciclev10019448m	35.0577	3.32693	3.39747	up	0.94851	Sodium/calcium exchanger family protein
Leaf	Ciclev10025741m	180.705	39.4655	2.19497	up	0.948395	Auxin efflux carrier family protein
Leaf	Ciclev10029015m	38.1428	4.03105	3.24218	up	0.948325	GATA transcription factor 11
Leaf	Ciclev10025326m	29.2556	1.72508	4.08398	up	0.948233	SKU5 similar 17
Leaf	Ciclev10000110m	85.4531	15.7017	2.44421	up	0.947955	Leucine-rich repeat transmembrane protein kinase family protein
Leaf	Ciclev10007195m	26.6263	0.915347	4.86239	up	0.947469
Leaf	Ciclev10020292m	26.118	0.651304	5.32557	up	0.947423	COBRA-like extracellular glycosyl-phosphatidyl inositol-anchored protein family
Leaf	Ciclev10032081m	25.3642	0.211234	6.90781	up	0.947284	Peroxidase superfamily protein
Leaf	Ciclev10027941m	30.991	2.41159	3.68379	up	0.946961	Leucine-rich repeat protein kinase family protein
Leaf	Ciclev10025408m	52.1308	8.41415	2.63125	up	0.946868	Cytochrome P450 superfamily protein
Leaf	Ciclev10031070m	24.6806	0.176028	7.13143	up	0.945596	laccase 5
Leaf	Ciclev10009447m	24.3125	0.0704113	8.43168	up	0.945018	Integrase-type DNA-binding superfamily protein
Leaf	Ciclev10009942m	48.292	7.79805	2.6306	up	0.944301
Leaf	Ciclev10019694m	94.831	19.6624	2.26992	up	0.943838	Protein of unknown function (DUF604)
Leaf	Ciclev10004254m	46.504	7.32277	2.66689	up	0.94363	Leucine-rich repeat protein kinase family protein
Leaf	Ciclev10025280m	91.5006	18.8174	2.28171	up	0.943583	4-coumarate:CoA ligase 2
Leaf	Ciclev10006302m	31.1312	2.83405	3.45742	up	0.943583	cAMP-regulated phosphoprotein 19-related protein
Leaf	Ciclev10000312m	31.5169	3.02769	3.37984	up	0.943422	early-responsive to dehydration stress protein (ERD4)
Leaf	Ciclev10004881m	153.447	37.582	2.02963	up	0.943422	UDP-D-glucuronate 4-epimerase 6
Leaf	Ciclev10011672m	107.557	23.8166	2.17506	up	0.943213	conserved peptide upstream open reading frame 47
Leaf	Ciclev10027728m	106.435	23.3765	2.18684	up	0.943167	P-loop containing nucleoside triphosphate hydrolases superfamily protein
Leaf	Ciclev10022410m	69.8174	13.2197	2.40089	up	0.942751	Integrase-type DNA-binding superfamily protein
Leaf	Ciclev10010155m	30.4827	2.79885	3.44508	up	0.942496
Leaf	Ciclev10008384m	37.3189	4.59434	3.02198	up	0.942404	FAD/NAD(P)-binding oxidoreductase family protein
Leaf	Ciclev10009649m	26.0654	1.44343	4.17456	up	0.942057	early nodulin-like protein 15
Leaf	Ciclev10012929m	67.9067	13.0613	2.37826	up	0.941964	early nodulin-like protein 17
Leaf	Ciclev10018967m	39.4925	5.24564	2.91239	up	0.94164	Leucine-rich repeat protein kinase family protein
Leaf	Ciclev10025132m	36.793	4.59434	3.0015	up	0.941594	Phototropic-responsive NPH3 family protein
Leaf	Ciclev10030505m	26.7841	1.76028	3.9275	up	0.941455	topoisomerase II
Leaf	Ciclev10002416m	39.6502	5.49208	2.85191	up	0.941178
Leaf	Ciclev10014084m	101.527	23.1829	2.13073	up	0.940947	Outer arm dynein light chain 1 protein
Leaf	Ciclev10010195m	41.4031	6.05537	2.77345	up	0.940923	Fatty acid/sphingolipid desaturase
Leaf	Ciclev10014994m	23.8918	0.756921	4.98023	up	0.9406	glycosyl hydrolase 9B1
Leaf	Ciclev10004441m	81.7019	17.1628	2.25109	up	0.9406	TESMIN/TSO1-like CXC 2
Leaf	Ciclev10011662m	24.6456	1.16179	4.40691	up	0.940044	brassinosteroid-6-oxidase 1
Leaf	Ciclev10027751m	58.5814	10.4561	2.4861	up	0.939952	transmembrane kinase 1
Leaf	Ciclev10021501m	37.9499	4.9816	2.92942	up	0.939906	homeobox-leucine zipper protein 3
Leaf	Ciclev10000054m	335.011	82.8917	2.01491	up	0.939813	P-glycoprotein 13
Leaf	Ciclev10019056m	39.6502	5.77373	2.77976	up	0.939767	Leucine-rich repeat protein kinase family protein
Leaf	Ciclev10000437m	30.4651	3.02769	3.33087	up	0.939744	Cellulose-synthase-like C12
Leaf	Ciclev10000599m	24.5404	1.19699	4.35767	up	0.939559	NIMA-related serine/threonine kinase 1
Leaf	Ciclev10001877m	22.472	0.0880141	7.99618	up	0.93905	Peroxidase superfamily protein
Leaf	Ciclev10019146m	97.5831	23.2181	2.07138	up	0.938842	galacturonosyltransferase 1
Leaf	Ciclev10005745m	56.7233	10.1744	2.47899	up	0.938495
Leaf	Ciclev10022159m	31.622	3.50296	3.17428	up	0.938472	germin-like protein 10
Leaf	Ciclev10019790m	76.3907	16.5467	2.20686	up	0.938101	O-fucosyltransferase family protein
Leaf	Ciclev10025688m	88.8888	20.7361	2.09985	up	0.938101	Leucine-rich repeat (LRR) family protein
Leaf	Ciclev10030930m	23.8217	1.12658	4.40225	up	0.937431	polygalacturonase 2
Leaf	Ciclev10027176m	23.4536	0.968155	4.59843	up	0.937338	P-loop containing nucleoside triphosphate hydrolases superfamily protein
Leaf	Ciclev10005789m	90.554	21.8803	2.04915	up	0.937199	indole-3-acetic acid inducible 14
Leaf	Ciclev10002672m	27.4677	2.35878	3.54162	up	0.937176
Leaf	Ciclev10020109m	30.395	3.25652	3.22243	up	0.937061	Protein of Unknown Function (DUF239)
Leaf	Ciclev10011709m	26.3984	2.11234	3.64354	up	0.937037	tubulin alpha-2 chain
Leaf	Ciclev10009291m	86.8905	20.5073	2.08306	up	0.936922	Pathogenesis-related thaumatin superfamily protein
Leaf	Ciclev10007765m	51.5523	8.85422	2.5416	up	0.936714	Family of unknown function (DUF566)
Leaf	Ciclev10007531m	37.7045	5.52729	2.7701	up	0.936482	beta-galactosidase 12
Leaf	Ciclev10022453m	197.059	48.4958	2.0227	up	0.936436	Protein of unknown function (DUF1685)
Leaf	Ciclev10019207m	80.3873	18.4654	2.12215	up	0.936367	sulfate transporter 3;1
Leaf	Ciclev10011280m	25.6447	1.9011	3.75375	up	0.935996	Leucine-rich repeat protein kinase family protein
Leaf	Ciclev10025796m	22.6823	0.827333	4.77696	up	0.935742	Protein of unknown function (DUF579)
Leaf	Ciclev10008808m	64.6464	13.3957	2.27079	up	0.935279	N-MYC downregulated-like 2
Leaf	Ciclev10011470m	51.342	9.3823	2.45212	up	0.935002
Leaf	Ciclev10000393m	26.9243	2.53481	3.40896	up	0.934262	beta-galactosidase 10
Leaf	Ciclev10019828m	36.6703	5.70331	2.68474	up	0.934146	growth-regulating factor 7
Leaf	Ciclev10001649m	41.8589	7.05873	2.56805	up	0.933776	xyloglucan endotransglucosylase/hydrolase 30
Leaf	Ciclev10000311m	78.8623	19.3279	2.02865	up	0.933637	S-adenosyl-L-methionine-dependent methyltransferases superfamily protein
Leaf	Ciclev10028377m	20.8418	0.105617	7.62449	up	0.933151	3-ketoacyl-CoA synthase 12
Leaf	Ciclev10021190m	49.3612	9.3647	2.39807	up	0.932619	GATA transcription factor 5
Leaf	Ciclev10002569m	21.1047	0.457673	5.5271	up	0.932411	AUX/IAA transcriptional regulator family protein
Leaf	Ciclev10015857m	35.9517	5.80893	2.62971	up	0.932226	EXORDIUM like 1
Leaf	Ciclev10031440m	33.3048	4.73516	2.81425	up	0.931972	O-Glycosyl hydrolases family 17 protein
Leaf	Ciclev10006522m	30.3775	3.80221	2.99809	up	0.931972
Leaf	Ciclev10028355m	58.8794	12.6212	2.22191	up	0.931602	cytochrome P450, family 707, subfamily A, polypeptide 4
Leaf	Ciclev10014120m	51.3245	10.3153	2.31487	up	0.930931	formin homology 1
Leaf	Ciclev10011362m	21.1748	0.739319	4.84001	up	0.930607	laccase 17
Leaf	Ciclev10012140m	23.103	1.53145	3.91512	up	0.930584
Leaf	Ciclev10012680m	491	128.413	1.93494	up	0.930445
Leaf	Ciclev10025168m	34.5669	5.6329	2.61744	up	0.930445	mechanosensitive channel of small conductance-like 10
Leaf	Ciclev10028494m	54.0414	11.2306	2.26663	up	0.930237	cryptochrome-interacting basic-helix-loop-helix 1
Leaf	Ciclev10031320m	20.4562	0.404865	5.65895	up	0.930075	O-fucosyltransferase family protein
Leaf	Ciclev10025623m	20.7191	0.580893	5.15654	up	0.929936	Eukaryotic aspartyl protease family protein
Leaf	Ciclev10029515m	772.233	208.593	1.88834	up	0.929612	photosystem I subunit O
Leaf	Ciclev10008143m	386.511	102.255	1.91834	up	0.929381	Eukaryotic aspartyl protease family protein
Leaf	Ciclev10025377m	29.0979	3.7142	2.96979	up	0.929381	Cytochrome P450 superfamily protein
Leaf	Ciclev10001460m	30.9384	4.18947	2.88456	up	0.929265	nodulin MtN21 /EamA-like transporter family protein
Leaf	Ciclev10016286m	4997.51	1391.56	1.84451	up	0.929242	chlorophyll A/B-binding protein 2
Leaf	Ciclev10025931m	61.6139	14.3991	2.09728	up	0.92915	flavanone 3-hydroxylase
Leaf	Ciclev10000513m	60.457	14.0118	2.10926	up	0.928988	Leucine-rich repeat protein kinase family protein
Leaf	Ciclev10030723m	521.799	140.594	1.89196	up	0.928942	Cellulose synthase family protein
Leaf	Ciclev10029856m	98.0038	24.7848	1.98338	up	0.928595	serine carboxypeptidase-like 51
Leaf	Ciclev10014863m	59.9837	14.0294	2.09611	up	0.928502	cytochrome P450, family 706, subfamily A, polypeptide 4
Leaf	Ciclev10007993m	61.5087	14.5927	2.07554	up	0.928456	pectin methylesterase 44
Leaf	Ciclev10028003m	25.6798	2.60522	3.30116	up	0.92834	Plant U-Box 15
Leaf	Ciclev10009194m	285.703	75.2345	1.92505	up	0.928294	Concanavalin A-like lectin protein kinase family protein
Leaf	Ciclev10011719m	273.59	71.2386	1.94128	up	0.928294	beta-6 tubulin
Leaf	Ciclev10031656m	20.4912	0.739319	4.79267	up	0.927808	TRICHOME BIREFRINGENCE-LIKE 33
Leaf	Ciclev10012011m	49.9747	10.3681	2.26905	up	0.9276	geranylgeranyl pyrophosphate synthase 1
Leaf	Ciclev10020504m	1684.36	490.996	1.77842	up	0.927045	S-adenosylmethionine synthetase 2
Leaf	Ciclev10028623m	25.3818	2.58761	3.2941	up	0.92679	Plant protein of unknown function (DUF828)
Leaf	Ciclev10000328m	454.453	129.011	1.81664	up	0.926258	S-adenosyl-L-methionine-dependent methyltransferases superfamily protein
Leaf	Ciclev10020709m	19.2291	0.176028	6.77134	up	0.926235	GDSL-like Lipase/Acylhydrolase superfamily protein
Leaf	Ciclev10011081m	19.5447	0.404865	5.59319	up	0.926235	inflorescence meristem receptor-like kinase 2
Leaf	Ciclev10028018m	83.4899	20.6833	2.01313	up	0.925865	Glycosyl hydrolase family protein
Leaf	Ciclev10007570m	85.6635	21.7395	1.97836	up	0.925842
Leaf	Ciclev10029614m	39.1594	6.8651	2.51201	up	0.925518	Stress responsive A/B Barrel Domain
Leaf	Ciclev10007296m	356.852	100.97	1.8214	up	0.925333	cellulose synthase 1
Leaf	Ciclev10015870m	3704.9	1101.44	1.75004	up	0.925264	Peroxidase superfamily protein
Leaf	Ciclev10005425m	56.7233	13.7478	2.04474	up	0.925102	alpha/beta-Hydrolases superfamily protein
Leaf	Ciclev10021994m	30.1496	4.47112	2.75343	up	0.925032	RAB GTPase homolog A3
Leaf	Ciclev10031952m	155.744	39.9936	1.96133	up	0.924616	O-methyltransferase 1
Leaf	Ciclev10024517m	19.0539	0.299248	5.9926	up	0.924593	BANQUO 3
Leaf	Ciclev10002756m	212.888	57.7549	1.88208	up	0.924385	copper/zinc superoxide dismutase 1
Leaf	Ciclev10012036m	19.7725	0.827333	4.57889	up	0.923737	Nucleotide-diphospho-sugar transferases superfamily protein
Leaf	Ciclev10005111m	52.3411	12.3396	2.08465	up	0.923413	BCL-2-associated athanogene 7
Leaf	Ciclev10024601m	870.763	263.761	1.72305	up	0.92339	beta-hexosaminidase 2
Leaf	Ciclev10014351m	28.7122	4.10146	2.80746	up	0.923367	Subtilisin-like serine endopeptidase family protein
Leaf	Ciclev10019494m	47.6434	10.4385	2.19037	up	0.923274	IQ-domain 31
Leaf	Ciclev10019374m	50.9739	11.9699	2.09034	up	0.922766	ARM repeat superfamily protein
Leaf	Ciclev10031824m	28.4493	4.03105	2.81917	up	0.922766	Pyridoxal-dependent decarboxylase family protein
Leaf	Ciclev10025717m	144.858	38.515	1.91115	up	0.922766	O-fucosyltransferase family protein
Leaf	Ciclev10014882m	175.411	48.619	1.85115	up	0.922234	Domain of unknown function (DUF23)
Leaf	Ciclev10004394m	187.05	52.298	1.8386	up	0.92221	cellulose synthase like G2
Leaf	Ciclev10019938m	126.541	32.9877	1.9396	up	0.922141	Eukaryotic aspartyl protease family protein
Leaf	Ciclev10011186m	28.7473	4.27749	2.74859	up	0.92191	Concanavalin A-like lectin protein kinase family protein
Leaf	Ciclev10029498m	24.1372	2.53481	3.25131	up	0.921887	histone H2A 12
Leaf	Ciclev10007545m	45.4873	9.9632	2.19078	up	0.92184	seed imbibition 1
Leaf	Ciclev10009640m	27.0821	3.55577	2.9291	up	0.921748	sequence-specific DNA binding transcription factors
Leaf	Ciclev10008520m	1862.23	591.279	1.65512	up	0.921655	protochlorophyllide oxidoreductase A
Leaf	Ciclev10026152m	176.165	49.7104	1.82531	up	0.921655	pyridoxine biosynthesis 1.2
Leaf	Ciclev10019848m	1028.54	322.818	1.6718	up	0.921609	Eukaryotic aspartyl protease family protein
Leaf	Ciclev10028372m	264.58	77.382	1.77364	up	0.921609	O-Glycosyl hydrolases family 17 protein
Leaf	Ciclev10001913m	24.8559	2.90447	3.09724	up	0.921401	pinoresinol reductase 1
Leaf	Ciclev10000364m	44.2954	9.61114	2.20438	up	0.921331	Subtilisin-like serine endopeptidase family protein
Leaf	Ciclev10000980m	120.791	31.6851	1.93064	up	0.921308	Major facilitator superfamily protein
Leaf	Ciclev10012045m	27.3801	3.81981	2.84155	up	0.921285	Concanavalin A-like lectin family protein
Leaf	Ciclev10017776m	18.3527	0.24644	6.21861	up	0.921216	lipoxygenase 2
Leaf	Ciclev10013454m	18.861	0.598496	4.97792	up	0.921193	GAST1 protein homolog 4
Leaf	Ciclev10030611m	127.82	34.2023	1.90195	up	0.921077
Leaf	Ciclev10033128m	18.1599	0.140823	7.01073	up	0.921077	stomagen
Leaf	Ciclev10019825m	326.527	98.9455	1.7225	up	0.920846	glycerol-3-phosphate acyltransferase 8
Leaf	Ciclev10000262m	37.4942	7.26997	2.36665	up	0.920776	Transcription factor jumonji (jmj) family protein / zinc finger (C5HC2 type) family protein
Leaf	Ciclev10002906m	338.219	103.593	1.70704	up	0.920707
Leaf	Ciclev10008452m	24.032	2.64042	3.18612	up	0.920244	Leucine-rich repeat (LRR) family protein
Leaf	Ciclev10021187m	568.268	179.584	1.66191	up	0.920244	Chitinase family protein
Leaf	Ciclev10016287m	5613.16	1837.15	1.61134	up	0.920198	light-harvesting chlorophyll-protein complex II subunit B1
Leaf	Ciclev10016123m	19.3343	0.950552	4.34625	up	0.920105	xyloglucan endotransglucosylase/hydrolase 5
Leaf	Ciclev10029653m	17.932	0.176028	6.67059	up	0.91999	SAUR-like auxin-responsive protein family
Leaf	Ciclev10011448m	48.2744	11.6531	2.05055	up	0.919828	glyoxal oxidase-related protein
Leaf	Ciclev10025446m	169.346	48.9887	1.78946	up	0.919782	Sulfite exporter TauE/SafE family protein
Leaf	Ciclev10028078m	35.0927	6.33702	2.4693	up	0.919735	glutamine-dependent asparagine synthase 1
Leaf	Ciclev10026224m	48.3445	11.7587	2.03963	up	0.919666	phosphatidic acid phosphatase-related / PAP2-related
Leaf	Ciclev10011273m	40.6669	8.39655	2.27599	up	0.919365	ATP-binding cassette 14
Leaf	Ciclev10026269m	18.4053	0.56329	5.0301	up	0.919365
Leaf	Ciclev10019602m	19.9303	1.2674	3.97502	up	0.919319	glycosyl hydrolase 9B13
Leaf	Ciclev10018599m	99.7041	25.9466	1.94211	up	0.918903	Leucine-rich receptor-like protein kinase family protein
Leaf	Ciclev10001095m	324.178	101.656	1.67309	up	0.918787	UDP-Glycosyltransferase superfamily protein
Leaf	Ciclev10014787m	122.912	34.0439	1.85216	up	0.918764	methylesterase PCR A
Leaf	Ciclev10029471m	24.8384	3.06289	3.0196	up	0.918509	proline-rich family protein
Leaf	Ciclev10015583m	30.7806	5.21044	2.56255	up	0.918486	GDSL-like Lipase/Acylhydrolase superfamily protein
Leaf	Ciclev10000643m	291.137	90.5665	1.68465	up	0.918463	S-adenosyl-L-methionine-dependent methyltransferases superfamily protein
Leaf	Ciclev10025613m	45.2419	10.6145	2.09162	up	0.918371	acyl-CoA-binding domain 3
Leaf	Ciclev10011974m	33.2697	5.77373	2.52664	up	0.918348	actin-11
Leaf	Ciclev10021043m	167.944	49.1471	1.7728	up	0.918324	Sugar isomerase (SIS) family protein
Leaf	Ciclev10001435m	45.6626	10.8609	2.07187	up	0.918209	GDSL-like Lipase/Acylhydrolase superfamily protein
Leaf	Ciclev10031337m	42.7879	9.62874	2.15178	up	0.918047	Pectin lyase-like superfamily protein
Leaf	Ciclev10031390m	45.9606	11.213	2.03523	up	0.917561	UDP-glucose 6-dehydrogenase family protein
Leaf	Ciclev10025018m	128.504	37.0187	1.79549	up	0.917422	ATP binding microtubule motor family protein
Leaf	Ciclev10000355m	26.2933	3.7142	2.82357	up	0.917145	beta-D-xylosidase 4
Leaf	Ciclev10006057m	20.4562	1.65467	3.62792	up	0.917098
Leaf	Ciclev10007548m	24.4177	3.1157	2.9703	up	0.916821	kinesin 3
Leaf	Ciclev10028621m	174.096	52.7028	1.72393	up	0.916659	UDP-D-apiose/UDP-D-xylose synthase 2
Leaf	Ciclev10011580m	27.0996	4.20707	2.68738	up	0.91659
Leaf	Ciclev10004356m	108.381	30.2945	1.83898	up	0.916497	nucleolar protein gar2-related
Leaf	Ciclev10010861m	118.81	34.1847	1.79724	up	0.916219	HXXXD-type acyl-transferase family protein
Leaf	Ciclev10015586m	26.4686	3.94303	2.7469	up	0.915988	GDSL-like Lipase/Acylhydrolase superfamily protein
Leaf	Ciclev10030927m	43.0684	10.1392	2.08668	up	0.915872	Protein kinase superfamily protein
Leaf	Ciclev10011864m	19.422	1.30261	3.89821	up	0.915618	alpha/beta-Hydrolases superfamily protein
Leaf	Ciclev10014111m	43.6643	10.5089	2.05485	up	0.915526	Leucine-rich receptor-like protein kinase family protein
Leaf	Ciclev10007750m	57.4946	14.5751	1.97992	up	0.915456	gamma-glutamyl transpeptidase 4
Leaf	Ciclev10030409m	16.8978	0.0176028	9.90681	up	0.915364	SAUR-like auxin-responsive protein family
Leaf	Ciclev10009246m	31.587	5.50968	2.51929	up	0.915063
Leaf	Ciclev10024684m	180.056	57.174	1.65502	up	0.9143	binding
Leaf	Ciclev10026582m	36.7755	7.72764	2.25065	up	0.914253	early nodulin-like protein 17
Leaf	Ciclev10019633m	18.2125	0.985758	4.20755	up	0.914022	cytochrome P450, family 86, subfamily A, polypeptide 8
Leaf	Ciclev10000765m	540.537	180.57	1.58184	up	0.913768	Glutamyl-tRNA reductase family protein
Leaf	Ciclev10004432m	679.4	230.667	1.55845	up	0.913744	Deoxyxylulose-5-phosphate synthase
Leaf	Ciclev10018911m	26.4335	4.25988	2.63348	up	0.913513
Leaf	Ciclev10002008m	142.457	44.0775	1.69241	up	0.913444	Protein of unknown function (DUF3049)
Leaf	Ciclev10028426m	428.738	142.002	1.59419	up	0.913351	tubulin alpha-2 chain
Leaf	Ciclev10015277m	21.8409	2.35878	3.21092	up	0.913166	receptor like protein 51
Leaf	Ciclev10000150m	38.7037	8.87182	2.12517	up	0.912565	glycoside hydrolase family 2 protein
Leaf	Ciclev10000913m	20.4737	1.98912	3.36357	up	0.912495
Leaf	Ciclev10016966m	17.5639	0.774524	4.50316	up	0.912357	Pollen Ole e 1 allergen and extensin family protein
Leaf	Ciclev10029053m	16.8627	0.387262	5.44439	up	0.912218	unknown seed protein like 1
Leaf	Ciclev10001712m	138.741	43.7958	1.66353	up	0.911986	GDSL-like Lipase/Acylhydrolase superfamily protein
Leaf	Ciclev10004257m	102.631	30.5233	1.74949	up	0.911778	Myosin heavy chain-related protein
Leaf	Ciclev10008355m	97.0572	28.5342	1.76614	up	0.911478	UDP-D-glucuronate 4-epimerase 1
Leaf	Ciclev10028412m	123.648	38.3918	1.68738	up	0.911478	cation exchanger 1
Leaf	Ciclev10007823m	124.823	39.0079	1.67805	up	0.911362	microtubule-associated proteins 65-1
Leaf	Ciclev10011957m	99.2308	29.4847	1.75082	up	0.911015	Eukaryotic protein of unknown function (DUF914)
Leaf	Ciclev10025185m	130.94	41.8067	1.6471	up	0.910853	AMP-dependent synthetase and ligase family protein
Leaf	Ciclev10011643m	69.9751	18.3949	1.92753	up	0.910691	IQ-domain 2
Leaf	Ciclev10022672m	21.876	2.65803	3.04092	up	0.910575
Leaf	Ciclev10009198m	2360.08	805.752	1.55043	up	0.910113	light-harvesting chlorophyll B-binding protein 3
Leaf	Ciclev10016525m	1456.96	497.403	1.55048	up	0.909835	photosystem II subunit Q-2
Leaf	Ciclev10014569m	38.3181	9.29429	2.04361	up	0.909535	TPX2 (targeting protein for Xklp2) protein family
Leaf	Ciclev10029158m	225.474	75.0232	1.58755	up	0.909535	S-adenosyl-L-methionine-dependent methyltransferases superfamily protein
Leaf	Ciclev10005288m	132.623	43.5318	1.60719	up	0.909511	BCL-2-associated athanogene 1
Leaf	Ciclev10017247m	872.673	298.79	1.54631	up	0.909234	photosystem II subunit T
Leaf	Ciclev10012227m	203.352	68.2813	1.57442	up	0.908424	Heavy metal transport/detoxification superfamily protein
Leaf	Ciclev10005113m	35.9517	8.36134	2.10425	up	0.908262	TPX2 (targeting protein for Xklp2) protein family
Leaf	Ciclev10029367m	32.5686	6.81229	2.25727	up	0.907823	Bifunctional inhibitor/lipid-transfer protein/seed storage 2S albumin superfamily protein
Leaf	Ciclev10032123m	87.3988	26.4218	1.72588	up	0.907615	magnesium-protoporphyrin IX methyltransferase
Leaf	Ciclev10006215m	17.6866	1.14418	3.95027	up	0.907568
Leaf	Ciclev10013859m	28.537	5.12242	2.47793	up	0.90743	Leucine-rich repeat (LRR) family protein
Leaf	Ciclev10005075m	30.6404	6.10818	2.32662	up	0.907175	Exostosin family protein
Leaf	Ciclev10010825m	108.468	35.1704	1.62484	up	0.907083	GRAS family transcription factor family protein
Leaf	Ciclev10000891m	59.0196	15.1208	1.96466	up	0.906736	Lung seven transmembrane receptor family protein
Leaf	Ciclev10011062m	18.7909	1.63706	3.52085	up	0.906736	sucrose synthase 6
Leaf	Ciclev10020083m	165.665	56.2762	1.55767	up	0.906689	Major facilitator superfamily protein
Leaf	Ciclev10005147m	16.6173	0.774524	4.42324	up	0.906458	Protein of unknown function (DUF620)
Leaf	Ciclev10011779m	15.776	0.334454	5.55978	up	0.906065	Plant protein of unknown function (DUF828)
Leaf	Ciclev10018694m	146.366	49.1823	1.57337	up	0.905811	Protein of unknown function (DUF3741)
Leaf	Ciclev10000125m	63.4369	17.374	1.86839	up	0.905787	P-loop containing nucleoside triphosphate hydrolases superfamily protein
Leaf	Ciclev10000917m	27.8007	4.9816	2.48044	up	0.90551	UDP-Glycosyltransferase superfamily protein
Leaf	Ciclev10009184m	74.8657	22.1796	1.75507	up	0.905232	Concanavalin A-like lectin protein kinase family protein
Leaf	Ciclev10030950m	64.8567	18.1837	1.83461	up	0.905117	DHHC-type zinc finger family protein
Leaf	Ciclev10016280m	7637.49	2808.25	1.44343	up	0.90507	photosystem II light harvesting complex gene 2.1
Leaf	Ciclev10031332m	87.9597	27.6364	1.67027	up	0.905001	Eukaryotic aspartyl protease family protein
Leaf	Ciclev10011324m	15.7234	0.404865	5.27933	up	0.904816	EXS (ERD1/XPR1/SYG1) family protein
Leaf	Ciclev10007444m	27.976	5.24564	2.415	up	0.904515
Leaf	Ciclev10018776m	19.6323	2.05953	3.25284	up	0.904515	Leucine-rich repeat protein kinase family protein
Leaf	Ciclev10007645m	56.1975	14.6984	1.93485	up	0.904423	S-locus lectin protein kinase family protein
Leaf	Ciclev10020935m	16.1967	0.721716	4.48812	up	0.904214	Protein of Unknown Function (DUF239)
Leaf	Ciclev10014138m	65.8909	18.7646	1.81207	up	0.904145	HAESA-like 1
Leaf	Ciclev10031252m	15.811	0.545687	4.85671	up	0.90396	Pyridoxal phosphate (PLP)-dependent transferases superfamily protein
Leaf	Ciclev10019057m	34.6721	8.46696	2.03386	up	0.903844	tetratricopetide-repeat thioredoxin-like 1
Leaf	Ciclev10000600m	366.213	131.968	1.47249	up	0.903382	glycosyl hydrolase 9A1
Leaf	Ciclev10028735m	16.0739	0.721716	4.47715	up	0.903174	CYCLIN D1;1
Leaf	Ciclev10011647m	197.34	67.4892	1.54795	up	0.90315	HXXXD-type acyl-transferase family protein
Leaf	Ciclev10015735m	18.0722	1.54905	3.54432	up	0.902919	strictosidine synthase-like 4
Leaf	Ciclev10015739m	20.0881	2.4644	3.02703	up	0.902803	strictosidine synthase-like 4
Leaf	Ciclev10031983m	112.781	37.3884	1.59286	up	0.902803	UDP-glucuronic acid decarboxylase 3
Leaf	Ciclev10001422m	326.948	118.15	1.46844	up	0.902711	NAD(P)-binding Rossmann-fold superfamily protein
Leaf	Ciclev10005805m	16.0038	0.721716	4.47084	up	0.902665
Leaf	Ciclev10001511m	20.5789	2.60522	2.98169	up	0.902248	Protein of unknown function (DUF1645)
Leaf	Ciclev10018333m	16.109	0.844935	4.25288	up	0.901855	Subtilisin-like serine endopeptidase family protein
Leaf	Ciclev10016074m	3416.44	1301.83	1.39195	up	0.901832	chlorophyll A/B-binding protein 2
Leaf	Ciclev10027754m	30.9209	6.90031	2.16385	up	0.901323	NIMA (never in mitosis, gene A)-related 6
Leaf	Ciclev10011622m	205.613	73.351	1.48705	up	0.900999	UDP-glucose 6-dehydrogenase family protein
Leaf	Ciclev10029685m	15.0222	0.281645	5.73708	up	0.900583	SAUR-like auxin-responsive protein family
Leaf	Ciclev10019888m	17.9495	1.68987	3.40896	up	0.90056
Leaf	Ciclev10015338m	548.846	208.365	1.39729	up	0.900444	Protein of Unknown Function (DUF239)
Leaf	Ciclev10007694m	69.6596	21.4578	1.69882	up	0.900097	Leucine-rich repeat protein kinase family protein
Leaf	Ciclev10014346m	16.1967	0.985758	4.03832	up	0.900074	targeting protein for XKLP2
Leaf	Ciclev10004785m	62.0346	18.3597	1.75653	up	0.899866	cytochrome P450, family 71, subfamily B, polypeptide 34
Leaf	Ciclev10001859m	52.5339	14.2407	1.88323	up	0.899843	Abscisic acid-responsive (TB2/DP1, HVA22) family protein
Leaf	Ciclev10008811m	20.4737	2.64042	2.95493	up	0.899241
Leaf	Ciclev10029316m	21.6656	3.27412	2.72623	up	0.899195	GATA type zinc finger transcription factor family protein
Leaf	Ciclev10031989m	220.741	80.8498	1.44904	up	0.898964	Heavy metal transport/detoxification superfamily protein
Leaf	Ciclev10015527m	55.3035	15.7193	1.81483	up	0.898686	Protein of unknown function, DUF642
Leaf	Ciclev10011798m	37.7221	9.52313	1.9859	up	0.89864	TRICHOME BIREFRINGENCE-LIKE 19
Leaf	Ciclev10020162m	265.106	99.2447	1.41751	up	0.89827	Pectin lyase-like superfamily protein
Leaf	Ciclev10020528m	23.2608	3.83742	2.59969	up	0.898038	PATATIN-like protein 9
Leaf	Ciclev10012553m	712.863	279.374	1.35143	up	0.897969	gamma tonoplast intrinsic protein
Leaf	Ciclev10002132m	16.9679	1.42583	3.57294	up	0.897946	cyclin-dependent kinase B2;2
Leaf	Ciclev10030736m	69.9927	22.5316	1.63525	up	0.89783	OSBP(oxysterol binding protein)-related protein 1D
Leaf	Ciclev10013296m	15.3553	0.704113	4.44678	up	0.897692
Leaf	Ciclev10015574m	19.0013	2.32357	3.03168	up	0.897622	GDSL-like Lipase/Acylhydrolase superfamily protein
Leaf	Ciclev10022881m	179.793	65.9754	1.44634	up	0.89753	SPIRAL1-like1
Leaf	Ciclev10020848m	16.5122	1.2498	3.72376	up	0.897437
Leaf	Ciclev10025585m	20.2984	2.78125	2.86756	up	0.897183	Galactosyl transferase GMA12/MNN10 family protein
Leaf	Ciclev10001248m	66.0487	20.965	1.65555	up	0.89709	Protein phosphatase 2C family protein
Leaf	Ciclev10029378m	118.425	41.1378	1.52544	up	0.896974	Pollen Ole e 1 allergen and extensin family protein
Leaf	Ciclev10032084m	187.751	69.6544	1.43054	up	0.896581	NAD(P)-linked oxidoreductase superfamily protein
Leaf	Ciclev10030941m	56.9512	16.9691	1.74681	up	0.896512	Leucine-rich repeat protein kinase family protein
Leaf	Ciclev10026043m	24.3476	4.25988	2.51489	up	0.896165	aspartate-glutamate racemase family
Leaf	Ciclev10025417m	126.821	45.0808	1.49221	up	0.896049	Cytochrome P450 superfamily protein
Leaf	Ciclev10025367m	52.902	15.3849	1.78181	up	0.896026	FAD/NAD(P)-binding oxidoreductase family protein
Leaf	Ciclev10002160m	55.0581	16.2474	1.76075	up	0.895934
Leaf	Ciclev10000102m	115.34	40.4689	1.51101	up	0.895864	Plant protein of unknown function (DUF869)
Leaf	Ciclev10000431m	16.6173	1.40823	3.56074	up	0.895656
Leaf	Ciclev10028689m	103.14	35.4873	1.53923	up	0.895286	2-oxoglutarate (2OG) and Fe(II)-dependent oxygenase superfamily protein
Leaf	Ciclev10012370m	2877.39	1162.47	1.30757	up	0.895147	light harvesting complex photosystem II
Leaf	Ciclev10031232m	58.7742	18.0957	1.69954	up	0.894939	non-specific phospholipase C6
Leaf	Ciclev10000216m	20.1582	2.88686	2.80379	up	0.894916	dynamin-like 3
Leaf	Ciclev10000060m	120.809	43.3557	1.47843	up	0.894823	P-glycoprotein 2
Leaf	Ciclev10004263m	29.6939	7.09394	2.06551	up	0.894615	Leucine-rich repeat protein kinase family protein
Leaf	Ciclev10007676m	48.7652	13.9062	1.81012	up	0.894083	Regulator of Vps4 activity in the MVB pathway protein
Leaf	Ciclev10015639m	20.8418	3.34454	2.6396	up	0.89406	DNA glycosylase superfamily protein
Leaf	Ciclev10008649m	261.636	101.78	1.36211	up	0.894037	early nodulin-like protein 1
Leaf	Ciclev10000835m	414.101	165.238	1.32544	up	0.893412	Class-II DAHP synthetase family protein
Leaf	Ciclev10011910m	60.755	19.5743	1.63404	up	0.893227	F-box family protein
Leaf	Ciclev10019186m	14.3561	0.528085	4.76475	up	0.893112	GRAS family transcription factor
Leaf	Ciclev10020144m	17.3886	1.79549	3.2757	up	0.893065	myb domain protein 55
Leaf	Ciclev10031021m	15.9162	1.21459	3.71195	up	0.893065	microtubule-associated protein 65-8
Leaf	Ciclev10025075m	153.763	58.2301	1.40087	up	0.892718
Leaf	Ciclev10019673m	352.733	140.312	1.32994	up	0.892556	Xanthine/uracil permease family protein
Leaf	Ciclev10024767m	52.3937	15.9834	1.71282	up	0.89214	Plant protein of unknown function (DUF869)
Leaf	Ciclev10004322m	46.2236	13.0965	1.81945	up	0.892001	transmembrane kinase 1
Leaf	Ciclev10011789m	26.2757	5.54489	2.2445	up	0.891724	cytochrome P450, family 77, subfamily A, polypeptide 5 pseudogene
Leaf	Ciclev10025335m	40.5793	10.6321	1.93232	up	0.891446	Cytochrome P450 superfamily protein
Leaf	Ciclev10009470m	14.3737	0.633702	4.50348	up	0.8914	RHO-related protein from plants 9
Leaf	Ciclev10016504m	22.7349	3.90783	2.54047	up	0.891169	fatty acid hydroxylase 2
Leaf	Ciclev10013135m	20.0004	3.1157	2.6824	up	0.891145	Bifunctional inhibitor/lipid-transfer protein/seed storage 2S albumin superfamily protein
Leaf	Ciclev10025952m	19.0539	2.62282	2.86089	up	0.890937	galacturonosyltransferase-like 2
Leaf	Ciclev10020789m	90.2735	31.7907	1.5057	up	0.890891	TRICHOME BIREFRINGENCE-LIKE 41
Leaf	Ciclev10028131m	20.1056	3.22132	2.64187	up	0.890706	Protein kinase protein with adenine nucleotide alpha hydrolases-like domain
Leaf	Ciclev10029932m	42.6301	11.7059	1.86464	up	0.89066	Class I glutamine amidotransferase-like superfamily protein
Leaf	Ciclev10024844m	26.1881	5.65051	2.21246	up	0.890637	Protein kinase superfamily protein
Leaf	Ciclev10015481m	17.1082	1.83069	3.22422	up	0.890567	Heavy metal transport/detoxification superfamily protein
Leaf	Ciclev10027740m	256.92	102.167	1.33039	up	0.890521	phototropin 1
Leaf	Ciclev10028264m	22.6473	3.92543	2.52841	up	0.890475	MATE efflux family protein
Leaf	Ciclev10002698m	2188.07	911.967	1.26261	up	0.890359	plastocyanin 1
Leaf	Ciclev10025272m	18.6857	2.4996	2.90217	up	0.890012	plant glycogenin-like starch initiation protein 1
Leaf	Ciclev10021255m	14.0055	0.56329	4.63598	up	0.889202	syntaxin of plants 111
Leaf	Ciclev10011768m	17.3711	2.07713	3.06402	up	0.889087	SEC14 cytosolic factor family protein / phosphoglyceride transfer family protein
Leaf	Ciclev10014403m	19.5096	2.99248	2.70477	up	0.889017	Tetratricopeptide repeat (TPR)-like superfamily protein
Leaf	Ciclev10011191m	25.3467	5.35126	2.24385	up	0.888971	RHO guanyl-nucleotide exchange factor 7
Leaf	Ciclev10003131m	21.0171	3.57337	2.5562	up	0.888624	Rhamnogalacturonate lyase family protein
Leaf	Ciclev10015052m	37.3715	9.62874	1.95652	up	0.88837	basic helix-loop-helix (bHLH) DNA-binding superfamily protein
Leaf	Ciclev10023364m	22.5421	4.08385	2.46462	up	0.888185	arabinogalactan protein 20
Leaf	Ciclev10020035m	37.7747	9.92799	1.92784	up	0.888092	Pectin lyase-like superfamily protein
Leaf	Ciclev10000109m	27.5904	6.74188	2.03294	up	0.887815	methionine S-methyltransferase
Leaf	Ciclev10028436m	42.7704	12.3396	1.79332	up	0.887815	tubulin beta 8
Leaf	Ciclev10010931m	37.2313	9.68155	1.9432	up	0.887768	ATP binding cassette subfamily B19
Leaf	Ciclev10000010m	82.1927	29.3263	1.48682	up	0.887745	Armadillo/beta-catenin-like repeat ; C2 calcium/lipid-binding domain (CaLB) protein
Leaf	Ciclev10028739m	16.8803	1.8835	3.16385	up	0.887745	xylem cysteine peptidase 1
Leaf	Ciclev10002900m	346.16	143.533	1.27005	up	0.887421
Leaf	Ciclev10017794m	80.6853	28.6574	1.4934	up	0.887167	NB-ARC domain-containing disease resistance protein
Leaf	Ciclev10016947m	14.6366	1.00336	3.86667	up	0.886959	Cupredoxin superfamily protein
Leaf	Ciclev10016953m	148.82	58.7934	1.33984	up	0.886751
Leaf	Ciclev10031284m	13.9354	0.68651	4.34333	up	0.88638	Nucleotide-diphospho-sugar transferases superfamily protein
Leaf	Ciclev10015208m	101.878	38.6382	1.39874	up	0.886288	Auxin efflux carrier family protein
Leaf	Ciclev10004216m	37.3364	10.016	1.89828	up	0.88601	Regulator of chromosome condensation (RCC1) family with FYVE zinc finger domain
Leaf	Ciclev10003680m	13.9004	0.68651	4.3397	up	0.885964	P-loop containing nucleoside triphosphate hydrolases superfamily protein
Leaf	Ciclev10002391m	37.0209	9.91039	1.90133	up	0.885525
Leaf	Ciclev10005884m	25.9777	6.09058	2.09263	up	0.88527
Leaf	Ciclev10004821m	14.3912	0.985758	3.86781	up	0.885062	cytochrome P450, family 706, subfamily A, polypeptide 6
Leaf	Ciclev10028017m	57.8802	19.6624	1.55764	up	0.884923	Protein kinase superfamily protein
Leaf	Ciclev10026558m	26.1881	6.2666	2.06316	up	0.8849	hydroxycinnamoyl-CoA shikimate/quinate hydroxycinnamoyl transferase
Leaf	Ciclev10004948m	57.1616	19.2751	1.56831	up	0.884831	UDP-xylosyltransferase 2
Leaf	Ciclev10007445m	16.2317	1.76028	3.20494	up	0.884507	protein kinase family protein
Leaf	Ciclev10016041m	14.6716	1.12658	3.70301	up	0.884322	HSP20-like chaperones superfamily protein
Leaf	Ciclev10017209m	38.5635	10.8961	1.82342	up	0.883905	Cystatin/monellin superfamily protein
Leaf	Ciclev10008480m	18.826	3.06289	2.61976	up	0.883859	Protein of unknown function (DUF1005)
Leaf	Ciclev10022230m	185.192	76.273	1.27978	up	0.883859	plasmodesmata callose-binding protein 3
Leaf	Ciclev10029650m	14.7242	1.17939	3.64208	up	0.883859	SAUR-like auxin-responsive protein family
Leaf	Ciclev10007329m	16.5998	2.02432	3.03565	up	0.883582	Leucine-rich repeat receptor-like protein kinase family protein
Leaf	Ciclev10002881m	12.7259	0.105617	6.91279	up	0.883535	Glycosyl hydrolase family 35 protein
Leaf	Ciclev10028206m	45.873	14.6455	1.64718	up	0.88335	flavin-dependent monooxygenase 1
Leaf	Ciclev10019211m	17.8794	2.55241	2.80837	up	0.883235	Leucine-rich repeat protein kinase family protein
Leaf	Ciclev10023264m	14.1633	0.985758	3.84478	up	0.882795	gamma histone variant H2AX
Leaf	Ciclev10015026m	13.1291	0.457673	4.84231	up	0.882703	Pectin lyase-like superfamily protein
Leaf	Ciclev10028754m	13.0239	0.387262	5.07171	up	0.882703	Nucleotide/sugar transporter family protein
Leaf	Ciclev10000483m	16.2492	1.8835	3.10888	up	0.882679	oxidoreductases, acting on NADH or NADPH
Leaf	Ciclev10026517m	65.4527	22.9717	1.5106	up	0.882402	KIP-related protein 2
Leaf	Ciclev10023137m	34.7948	9.27669	1.90719	up	0.882309
Leaf	Ciclev10017020m	13.094	0.475276	4.784	up	0.882217	AWPM-19-like family protein
Leaf	Ciclev10019304m	120.318	48.4958	1.31092	up	0.882217	glucuronidase 2
Leaf	Ciclev10000602m	21.3151	3.99584	2.4153	up	0.882055	Prefoldin chaperone subunit family protein
Leaf	Ciclev10000673m	225.403	95.4601	1.23954	up	0.882032	Phototropic-responsive NPH3 family protein
Leaf	Ciclev10000363m	299.954	128.765	1.22	up	0.882032	Subtilase family protein
Leaf	Ciclev10009079m	13.0064	0.440071	4.88534	up	0.881916	IQ-domain 10
Leaf	Ciclev10004499m	21.4378	4.10146	2.38595	up	0.881824	Leucine-rich repeat protein kinase family protein
Leaf	Ciclev10016889m	14.3386	1.09137	3.71568	up	0.881731	ubiquitin-conjugating enzyme19
Leaf	Ciclev10005087m	121.492	49.1823	1.30466	up	0.881731	basic helix-loop-helix (bHLH) DNA-binding superfamily protein
Leaf	Ciclev10017131m	20.9294	3.78461	2.46732	up	0.881662	Histone superfamily protein
Leaf	Ciclev10007280m	13.8653	0.915347	3.92102	up	0.881107	Kinesin motor family protein
Leaf	Ciclev10032484m	15.0397	1.47864	3.34644	up	0.881037	expansin A4
Leaf	Ciclev10032564m	51.377	17.3564	1.56566	up	0.881014	PsbP-like protein 1
Leaf	Ciclev10007289m	13.2343	0.633702	4.38433	up	0.880713	kinesin-like protein 1
Leaf	Ciclev10030340m	12.6909	0.299248	5.40631	up	0.880713	NAD(P)-binding Rossmann-fold superfamily protein
Leaf	Ciclev10001665m	20.5087	3.66139	2.48578	up	0.88069	xylem cysteine peptidase 2
Leaf	Ciclev10011912m	233.817	100.371	1.22003	up	0.880297	S-adenosylmethionine synthetase family protein
Leaf	Ciclev10025329m	122.439	50.168	1.28722	up	0.880297	O-fucosyltransferase family protein
Leaf	Ciclev10011137m	32.9542	8.57257	1.94266	up	0.880135	Protein kinase superfamily protein
Leaf	Ciclev10007716m	279.322	120.826	1.209	up	0.880043	Endomembrane protein 70 protein family
Leaf	Ciclev10011857m	17.9846	2.85166	2.65689	up	0.880019	Cation efflux family protein
Leaf	Ciclev10005117m	17.5814	2.60522	2.75458	up	0.879696	Pectinacetylesterase family protein
Leaf	Ciclev10021861m	3135.72	1409.37	1.15375	up	0.87958	light-harvesting chlorophyll-protein complex I subunit A4
Leaf	Ciclev10020276m	60.4745	21.3522	1.50194	up	0.879349	Nucleotide-diphospho-sugar transferases superfamily protein
Leaf	Ciclev10019205m	132.36	54.868	1.27043	up	0.879349	AMP-dependent synthetase and ligase family protein
Leaf	Ciclev10020385m	131.817	54.7448	1.26774	up	0.879279	Pectinacetylesterase family protein
Leaf	Ciclev10004456m	1518.56	682.514	1.15377	up	0.879187	heat shock protein 90.1
Leaf	Ciclev10025588m	359.902	158.373	1.18428	up	0.878863	tubulin alpha-2 chain
Leaf	Ciclev10001298m	413.505	183.333	1.17344	up	0.878516	calreticulin 1a
Leaf	Ciclev10032628m	19.8602	3.50296	2.50323	up	0.877891	Cytochrome b561/ferric reductase transmembrane protein family
Leaf	Ciclev10031949m	301.917	133.429	1.17807	up	0.877868	O-methyltransferase 1
Leaf	Ciclev10011127m	14.4262	1.32021	3.44985	up	0.877706	EXS (ERD1/XPR1/SYG1) family protein
Leaf	Ciclev10002869m	206.052	89.8448	1.1975	up	0.877544
Leaf	Ciclev10001371m	507.004	229.259	1.14502	up	0.877244	Pectinacetylesterase family protein
Leaf	Ciclev10011302m	31.6746	8.32613	1.92761	up	0.877244	NSP-interacting kinase 1
Leaf	Ciclev10000518m	14.5314	1.42583	3.3493	up	0.877221	Leucine-rich repeat protein kinase family protein
Leaf	Ciclev10012633m	56.6182	20.0848	1.49516	up	0.877151	plasma membrane intrinsic protein 2;4
Leaf	Ciclev10001614m	190.854	82.8741	1.20348	up	0.876989	cytochrome P450, family 82, subfamily C, polypeptide 4
Leaf	Ciclev10019946m	77.6177	30.2064	1.36153	up	0.876897
Leaf	Ciclev10014322m	17.4763	2.74604	2.66997	up	0.876874	Double Clp-N motif-containing P-loop nucleoside triphosphate hydrolases superfamily protein
Leaf	Ciclev10015455m	53.165	18.3069	1.53809	up	0.876804	F-box family protein
Leaf	Ciclev10021171m	73.6211	28.2701	1.38084	up	0.876712	Cyclophilin-like peptidyl-prolyl cis-trans isomerase family protein
Leaf	Ciclev10031029m	102.649	41.9123	1.29227	up	0.876689	phospholipase C 2
Leaf	Ciclev10020573m	20.5087	3.99584	2.35967	up	0.87655	interactor of constitutive active rops 1
Leaf	Ciclev10027856m	22.77	5.14002	2.14729	up	0.876457	Glycosyl hydrolase family protein
Leaf	Ciclev10019379m	31.6921	8.41415	1.91324	up	0.876318	Leucine-rich repeat protein kinase family protein
Leaf	Ciclev10026158m	45.5399	15.244	1.57889	up	0.876133
Leaf	Ciclev10033733m	165.332	71.4851	1.20965	up	0.876064	Glucose-1-phosphate adenylyltransferase family protein
Leaf	Ciclev10005200m	66.2766	24.8552	1.41495	up	0.876064	Protein phosphatase 2C family protein
Leaf	Ciclev10014629m	14.2159	1.30261	3.44803	up	0.875902	Tetratricopeptide repeat (TPR)-like superfamily protein
Leaf	Ciclev10026390m	22.6648	5.17523	2.13076	up	0.875069	HSP20-like chaperones superfamily protein
Leaf	Ciclev10012382m	109.345	45.7673	1.2565	up	0.875023	NOD26-like intrinsic protein 4;2
Leaf	Ciclev10017407m	14.1808	1.33781	3.40599	up	0.874954
Leaf	Ciclev10028665m	23.5588	5.72092	2.04195	up	0.874931	actin 3
Leaf	Ciclev10006192m	13.4797	1.00336	3.74787	up	0.874676	cytochrome B5 isoform B
Leaf	Ciclev10004685m	81.1585	32.2836	1.32994	up	0.874514	O-acetyltransferase family protein
Leaf	Ciclev10007365m	56.5831	20.6305	1.45559	up	0.874375	COP1-interacting protein 7
Leaf	Ciclev10001726m	39.8956	13.0789	1.60899	up	0.874306	Peroxidase superfamily protein
Leaf	Ciclev10031914m	91.6758	37.4236	1.29259	up	0.87426	reversibly glycosylated polypeptide 3
Leaf	Ciclev10001658m	19.5271	3.62618	2.42896	up	0.87426	Nucleotide-diphospho-sugar transferases superfamily protein
Leaf	Ciclev10025225m	16.6875	2.4644	2.75946	up	0.874214	gamma-glutamyl transpeptidase 1
Leaf	Ciclev10011948m	20.5964	4.17187	2.30363	up	0.874098	myb domain protein 106
Leaf	Ciclev10007331m	34.8473	10.4033	1.74401	up	0.873543	RNA-dependent RNA polymerase family protein
Leaf	Ciclev10005417m	20.3335	4.04865	2.32834	up	0.87345	Protein of unknown function (DUF3049)
Leaf	Ciclev10014505m	36.8106	11.5298	1.67475	up	0.87308	Ankyrin repeat family protein
Leaf	Ciclev10019184m	628.917	293.439	1.09981	up	0.872571	Heat shock protein 70 (Hsp 70) family protein
Leaf	Ciclev10024786m	22.5246	5.33365	2.0783	up	0.872456	P-loop containing nucleoside triphosphate hydrolases superfamily protein
Leaf	Ciclev10001192m	58.9846	22.1796	1.41111	up	0.872271	Protein of unknown function, DUF547
Leaf	Ciclev10029326m	183.825	82.258	1.16011	up	0.872132	proline-rich protein 2
Leaf	Ciclev10024713m	114.235	49.1295	1.21735	up	0.872039
Leaf	Ciclev10023400m	40.8422	13.4838	1.59884	up	0.871461	cellulose synthase-like D3
Leaf	Ciclev10026552m	269.944	123.378	1.12957	up	0.871438	Lactoylglutathione lyase / glyoxalase I family protein
Leaf	Ciclev10000705m	11.6567	0.12322	6.56378	up	0.871114	Plant invertase/pectin methylesterase inhibitor superfamily
Leaf	Ciclev10008315m	253.835	115.633	1.13434	up	0.871045	SOS3-interacting protein 3
Leaf	Ciclev10008225m	76.4258	30.981	1.30268	up	0.870929	CBL-interacting protein kinase 5
Leaf	Ciclev10014589m	71.8858	28.6046	1.32946	up	0.870929	ERD (early-responsive to dehydration stress) family protein
Leaf	Ciclev10014240m	36.8281	11.9171	1.62777	up	0.87086	Putative glycosyl hydrolase of unknown function (DUF1680)
Leaf	Ciclev10004755m	102.684	43.7254	1.23167	up	0.870605	tubulin beta 8
Leaf	Ciclev10020804m	41.1402	13.8886	1.56664	up	0.870536	Nucleotide-sugar transporter family protein
Leaf	Ciclev10014764m	188.54	85.7433	1.13678	up	0.870281
Leaf	Ciclev10032838m	40.3514	13.4838	1.5814	up	0.869934	GATA type zinc finger transcription factor family protein
Leaf	Ciclev10019408m	50.0974	18.0429	1.47331	up	0.869888	calcium exchanger 7
Leaf	Ciclev10022647m	13.1466	1.05617	3.63778	up	0.869819	Phospholipase A2 family protein
Leaf	Ciclev10031185m	559.223	265.609	1.07412	up	0.869449	calnexin 1
Leaf	Ciclev10026223m	59.6156	22.9893	1.37473	up	0.869425	HAD superfamily, subfamily IIIB acid phosphatase
Leaf	Ciclev10031574m	46.2411	16.2826	1.50584	up	0.868917	galacturonosyltransferase-like 3
Leaf	Ciclev10022546m	13.3394	1.17939	3.49959	up	0.868523
Leaf	Ciclev10032940m	35.1804	11.2658	1.64282	up	0.868361	lsd one like 1
Leaf	Ciclev10021105m	45.908	16.265	1.49698	up	0.868199	pfkB-like carbohydrate kinase family protein
Leaf	Ciclev10020248m	35.8815	11.7587	1.60952	up	0.86813	basic helix-loop-helix (bHLH) DNA-binding superfamily protein
Leaf	Ciclev10029251m	66.3291	26.5979	1.31833	up	0.867806	germin-like protein 5
Leaf	Ciclev10015568m	34.9876	11.3186	1.62815	up	0.867667	senescence-related gene 3
Leaf	Ciclev10029116m	3733.78	1829.53	1.02916	up	0.867644	light harvesting complex photosystem II subunit 6
Leaf	Ciclev10015408m	15.1099	1.97152	2.93811	up	0.867575	Reticulon family protein
Leaf	Ciclev10007292m	151.502	68.827	1.13829	up	0.867529	Transcriptional factor B3 family protein / auxin-responsive factor AUX/IAA-related
Leaf	Ciclev10009541m	11.3061	0.105617	6.74212	up	0.867413	Plant invertase/pectin methylesterase inhibitor superfamily protein
Leaf	Ciclev10005494m	29.9919	8.50216	1.81867	up	0.867159	Nucleotide-sugar transporter family protein
Leaf	Ciclev10011420m	143.754	65.0424	1.14415	up	0.866974	Cytochrome P450 superfamily protein
Leaf	Ciclev10002687m	1056.31	517.505	1.02938	up	0.866927	photosystem I reaction center subunit PSI-N, chloroplast, putative / PSI-N, putative (PSAN)
Leaf	Ciclev10013304m	14.5665	1.81309	3.00613	up	0.866673	Low temperature and salt responsive protein family
Leaf	Ciclev10005737m	27.2749	7.05873	1.95009	up	0.86658	Nodulin MtN3 family protein
Leaf	Ciclev10017825m	13.1466	1.16179	3.50028	up	0.866395	Auxin-responsive family protein
Leaf	Ciclev10004653m	60.755	23.975	1.34147	up	0.866372	hydroxyproline-rich glycoprotein family protein
Leaf	Ciclev10004391m	32.7965	10.1568	1.69109	up	0.866187	Protein of unknown function (DUF288)
Leaf	Ciclev10020723m	158.285	72.9813	1.11693	up	0.865794	reversibly glycosylated polypeptide 3
Leaf	Ciclev10014768m	24.1197	6.14338	1.97311	up	0.865771	STRUBBELIG-receptor family 3
Leaf	Ciclev10031131m	37.2313	12.41	1.58501	up	0.865609	Transmembrane amino acid transporter family protein
Leaf	Ciclev10015736m	50.0098	18.7646	1.4142	up	0.865586	Core-2/I-branching beta-1,6-N-acetylglucosaminyltransferase family protein
Leaf	Ciclev10018883m	63.6823	25.8233	1.30222	up	0.864938	alpha-N-acetylglucosaminidase family / NAGLU family
Leaf	Ciclev10001088m	11.4113	0.352056	5.01851	up	0.864938	Protein kinase superfamily protein
Leaf	Ciclev10000657m	144.122	66.8027	1.10931	up	0.863851	Endomembrane protein 70 protein family
Leaf	Ciclev10022299m	14.7242	1.97152	2.90081	up	0.863781	Calcium-binding EF-hand family protein
Leaf	Ciclev10000648m	105.576	47.1932	1.16164	up	0.863643	Leucine-rich repeat protein kinase family protein
Leaf	Ciclev10027790m	58.3886	23.3765	1.32062	up	0.86355	Homeobox-leucine zipper family protein / lipid-binding START domain-containing protein
Leaf	Ciclev10014347m	140.038	64.6728	1.11459	up	0.863527	subtilase family protein
Leaf	Ciclev10005146m	48.292	18.3421	1.39662	up	0.862856	S-adenosylmethionine synthetase family protein
Leaf	Ciclev10000062m	90.7643	39.8528	1.18745	up	0.862787
Leaf	Ciclev10028475m	55.5314	21.9859	1.33672	up	0.862787	IQ-domain 5
Leaf	Ciclev10030977m	68.9935	28.939	1.25344	up	0.862602	MAP kinase 20
Leaf	Ciclev10009168m	10.938	0.140823	6.27933	up	0.862417	ABI-1-like 1
Leaf	Ciclev10010820m	17.3711	3.16851	2.45481	up	0.862347	Protein of unknown function (DUF1677)
Leaf	Ciclev10030659m	139.354	65.06	1.09891	up	0.862093	Plant protein of unknown function (DUF827)
Leaf	Ciclev10014941m	22.9277	5.79133	1.98513	up	0.86207	aspartic proteinase A1
Leaf	Ciclev10024826m	39.808	13.8886	1.51915	up	0.861977	SET domain-containing protein
Leaf	Ciclev10030958m	80.9833	35.188	1.20254	up	0.861954	Phototropic-responsive NPH3 family protein
Leaf	Ciclev10026742m	17.6866	3.41495	2.37272	up	0.861931	Histone superfamily protein
Leaf	Ciclev10014625m	136.147	63.3702	1.10328	up	0.861908	microtubule-associated proteins 70-1
Leaf	Ciclev10000479m	11.534	0.56329	4.35587	up	0.861769	Protein kinase superfamily protein
Leaf	Ciclev10001072m	12.0423	0.844935	3.83313	up	0.861653	like AUX1 3
Leaf	Ciclev10031367m	109.941	50.1504	1.13239	up	0.861006	IQ-domain 2
Leaf	Ciclev10015783m	31.9025	10.28	1.63382	up	0.860867	Peroxidase superfamily protein
Leaf	Ciclev10000059m	48.8354	18.9582	1.3651	up	0.860798
Leaf	Ciclev10001255m	12.2001	0.93295	3.70895	up	0.860751	C2H2-like zinc finger protein
Leaf	Ciclev10000860m	14.286	1.8659	2.93666	up	0.860705	cytochrome P450, family 706, subfamily A, polypeptide 6
Leaf	Ciclev10002026m	15.0397	2.34118	2.68348	up	0.860566	Protein of unknown function (DUF579)
Leaf	Ciclev10008077m	12.13	0.915347	3.72811	up	0.860127	aldehyde dehydrogenase 2C4
Leaf	Ciclev10018464m	60.7024	25.2072	1.26791	up	0.860057	Transcription factor jumonji (jmjC) domain-containing protein
Leaf	Ciclev10007706m	161.528	77.2412	1.06434	up	0.860034	epsin N-terminal homology (ENTH) domain-containing protein / clathrin assembly protein-related
Leaf	Ciclev10019182m	82.0876	36.3146	1.17661	up	0.859826	rhamnose biosynthesis 1
Leaf	Ciclev10019596m	12.3403	1.03857	3.57071	up	0.859757	IQ-domain 17
Leaf	Ciclev10000747m	34.2163	11.4594	1.57815	up	0.859595	Heavy metal transport/detoxification superfamily protein
Leaf	Ciclev10000037m	11.3587	0.580893	4.28938	up	0.859387	P-loop containing nucleoside triphosphate hydrolases superfamily protein
Leaf	Ciclev10000420m	12.0423	0.915347	3.71765	up	0.859155	Glycosyl hydrolase family 35 protein
Leaf	Ciclev10033189m	39.1068	13.9238	1.48986	up	0.85897
Leaf	Ciclev10026522m	26.9944	7.63962	1.82109	up	0.858901	indole-3-acetic acid inducible 14
Leaf	Ciclev10021785m	50.5882	20.0496	1.33523	up	0.858762	voltage dependent anion channel 3
Leaf	Ciclev10021606m	53.1825	21.4578	1.30945	up	0.858762	basic helix-loop-helix (bHLH) DNA-binding superfamily protein
Leaf	Ciclev10011239m	18.528	3.97824	2.2195	up	0.858577	Protein of unknown function (DUF740)
Leaf	Ciclev10025289m	93.1483	42.1412	1.1443	up	0.858461	O-fucosyltransferase family protein
Leaf	Ciclev10008006m	16.6524	2.99248	2.47632	up	0.858299	Nucleotide-diphospho-sugar transferases superfamily protein
Leaf	Ciclev10024291m	105.296	48.8654	1.10756	up	0.858207	P-loop containing nucleoside triphosphate hydrolases superfamily protein
Leaf	Ciclev10011300m	14.9346	2.41159	2.6306	up	0.858207	ROP interactive partner 3
Leaf	Ciclev10011493m	38.616	13.783	1.48631	up	0.858137	O-fucosyltransferase family protein
Leaf	Ciclev10014664m	12.0423	0.968155	3.63673	up	0.858114	Leucine-rich repeat (LRR) family protein
Leaf	Ciclev10014378m	18.1949	3.83742	2.24533	up	0.85786	ERD (early-responsive to dehydration stress) family protein
Leaf	Ciclev10025349m	33.6203	11.4066	1.55946	up	0.857351	cytochrome P450, family 82, subfamily C, polypeptide 4
Leaf	Ciclev10024665m	16.9679	3.29173	2.36589	up	0.857282
Leaf	Ciclev10009152m	12.6558	1.2498	3.34003	up	0.857235	Protein of unknown function (DUF1223)
Leaf	Ciclev10000761m	43.1911	16.3882	1.39807	up	0.857143	hydroxy methylglutaryl CoA reductase 1
Leaf	Ciclev10001851m	24.3476	6.249	1.96208	up	0.85705
Leaf	Ciclev10000939m	16.9679	3.30933	2.3582	up	0.856981	hexokinase 3
Leaf	Ciclev10031153m	39.7379	14.5047	1.45399	up	0.856912
Leaf	Ciclev10000144m	51.9029	21.1234	1.29697	up	0.856865	Uncharacterized protein
Leaf	Ciclev10018721m	14.3386	2.11234	2.76299	up	0.856333	Leucine-rich repeat transmembrane protein kinase
Leaf	Ciclev10031179m	43.7345	16.7755	1.38242	up	0.856079	beta glucosidase 15
Leaf	Ciclev10011366m	41.333	15.5433	1.411	up	0.855894	DNAJ heat shock N-terminal domain-containing protein
Leaf	Ciclev10014104m	100.581	46.9291	1.0998	up	0.855848
Leaf	Ciclev10004530m	54.0414	22.2676	1.27912	up	0.855639	Leucine-rich repeat protein kinase family protein
Leaf	Ciclev10020881m	38.8965	14.1879	1.45498	up	0.855616	alpha/beta-Hydrolases superfamily protein
Leaf	Ciclev10009482m	10.8328	0.440071	4.62153	up	0.855501	Putative membrane lipoprotein
Leaf	Ciclev10020097m	79.4582	35.8569	1.14794	up	0.855292	COBRA-like extracellular glycosyl-phosphatidyl inositol-anchored protein family
Leaf	Ciclev10004158m	13.1642	1.58425	3.05474	up	0.855292	phragmoplast-associated kinesin-related protein, putative
Leaf	Ciclev10010813m	75.7947	33.9734	1.15769	up	0.855084	Nucleotide-sugar transporter family protein
Leaf	Ciclev10025903m	53.7084	22.25	1.27134	up	0.854945	NAD(P)-binding Rossmann-fold superfamily protein
Leaf	Ciclev10005040m	10.2719	0.0528085	7.60372	up	0.854945	DNA glycosylase superfamily protein
Leaf	Ciclev10011683m	10.6926	0.387262	4.78716	up	0.854922	Transducin family protein / WD-40 repeat family protein
Leaf	Ciclev10030474m	72.1487	32.0019	1.17281	up	0.854807	HhH-GPD base excision DNA repair family protein
Leaf	Ciclev10014584m	19.0013	4.52393	2.07045	up	0.85476	ARM repeat superfamily protein
Leaf	Ciclev10005932m	68.8358	30.2416	1.18662	up	0.85476	winged-helix DNA-binding transcription factor family protein
Leaf	Ciclev10014163m	43.121	16.6699	1.37115	up	0.854598	P-loop containing nucleoside triphosphate hydrolases superfamily protein
Leaf	Ciclev10015211m	12.9713	1.51384	3.09904	up	0.854529	Protein kinase superfamily protein
Leaf	Ciclev10018877m	24.6105	6.65387	1.88701	up	0.854437	actin binding
Leaf	Ciclev10013090m	102.912	48.8126	1.07608	up	0.854251
Leaf	Ciclev10008127m	11.0958	0.633702	4.13006	up	0.854066	O-Glycosyl hydrolases family 17 protein
Leaf	Ciclev10014736m	25.0838	6.98832	1.84374	up	0.853951	ARM repeat superfamily protein
Leaf	Ciclev10008009m	12.5507	1.32021	3.24892	up	0.853465	ARM repeat superfamily protein
Leaf	Ciclev10012179m	17.4763	3.69659	2.24113	up	0.853419	Peroxidase superfamily protein
Leaf	Ciclev10024961m	86.1718	39.8	1.11445	up	0.853396	Protein kinase protein with adenine nucleotide alpha hydrolases-like domain
Leaf	Ciclev10019219m	13.7777	1.91871	2.84413	up	0.853303	basic helix-loop-helix (bHLH) DNA-binding superfamily protein
Leaf	Ciclev10010955m	61.9119	27.0379	1.19523	up	0.853234
Leaf	Ciclev10027659m	12.463	1.28501	3.27781	up	0.853118	phragmoplast orienting kinesin 2
Leaf	Ciclev10002603m	11.4639	0.844935	3.76211	up	0.853095
Leaf	Ciclev10014739m	23.3134	6.05537	1.94487	up	0.853026	F-box/RNI-like superfamily protein
Leaf	Ciclev10001961m	29.2031	9.50552	1.61928	up	0.853026
Leaf	Ciclev10001768m	16.6699	3.34454	2.31737	up	0.852355	basic helix-loop-helix (bHLH) DNA-binding superfamily protein
Leaf	Ciclev10014973m	12.7259	1.47864	3.10543	up	0.852262	cytochrome P450, family 710, subfamily A, polypeptide 1
Leaf	Ciclev10004330m	90.0807	42.3172	1.08997	up	0.85217	P-loop containing nucleoside triphosphate hydrolases superfamily protein
Leaf	Ciclev10012698m	11.9021	1.09137	3.447	up	0.852147	RmlC-like cupins superfamily protein
Leaf	Ciclev10025480m	59.0897	25.4713	1.21404	up	0.852123	MATE efflux family protein
Leaf	Ciclev10001740m	65.7682	29.1327	1.17475	up	0.851892	BRI1 kinase inhibitor 1
Leaf	Ciclev10019143m	43.9098	17.3388	1.34054	up	0.851638	Galactosyltransferase family protein
Leaf	Ciclev10014266m	27.5203	8.64299	1.67089	up	0.851476	Homeobox-leucine zipper family protein / lipid-binding START domain-containing protein
Leaf	Ciclev10014480m	10.9555	0.668907	4.03371	up	0.851337	tetratricopetide-repeat thioredoxin-like 3
Leaf	Ciclev10032396m	28.6772	9.41751	1.60649	up	0.851244	methyl esterase 1
Leaf	Ciclev10014832m	12.761	1.56665	3.02599	up	0.851175	Phototropic-responsive NPH3 family protein
Leaf	Ciclev10029495m	54.3569	23.1301	1.23269	up	0.851059	HSP20-like chaperones superfamily protein
Leaf	Ciclev10014073m	12.5331	1.42583	3.13587	up	0.851036
Leaf	Ciclev10027822m	10.3946	0.352056	4.88388	up	0.850944
Leaf	Ciclev10028137m	12.2877	1.28501	3.25737	up	0.850759	Plant protein of unknown function (DUF641)
Leaf	Ciclev10004478m	14.7768	2.482	2.57376	up	0.850712	Leucine-rich repeat protein kinase family protein
Leaf	Ciclev10011721m	54.1817	23.1477	1.22693	up	0.850689	TRICHOME BIREFRINGENCE-LIKE 19
Leaf	Ciclev10000047m	23.9795	6.68907	1.84192	up	0.850342	AAA-type ATPase family protein
Leaf	Ciclev10018774m	25.3467	7.44599	1.76726	up	0.850227	formin homology 1
Leaf	Ciclev10015309m	60.9478	26.8443	1.18296	up	0.850204	HXXXD-type acyl-transferase family protein
Leaf	Ciclev10033025m	62.6481	27.7949	1.17245	up	0.850134	acyl carrier protein 4
Leaf	Ciclev10012202m	16.3018	3.22132	2.33931	up	0.850134	cyclin-dependent kinase B1;2
Leaf	Ciclev10031831m	16.8627	3.52056	2.25996	up	0.850019	glucosyl transferase family 8
Leaf	Ciclev10011731m	56.2501	24.3271	1.20929	up	0.849833	Mannose-6-phosphate isomerase, type I
Leaf	Ciclev10000481m	39.7379	15.3673	1.37065	up	0.849672	DNA-binding bromodomain-containing protein
Leaf	Ciclev10019973m	79.9315	37.3532	1.09753	up	0.849602	SecY protein transport family protein
Leaf	Ciclev10033026m	9.97391	0.12322	6.33885	up	0.849394	phy rapidly regulated 2
Leaf	Ciclev10005370m	39.0192	14.9976	1.37945	up	0.849255	EXORDIUM like 3
Leaf	Ciclev10032441m	78.7045	36.7371	1.09921	up	0.849232	TCP family transcription factor
Leaf	Ciclev10030945m	11.271	0.897744	3.65017	up	0.849186	asparaginyl-tRNA synthetase 2
Leaf	Ciclev10000097m	36.8456	13.8006	1.41676	up	0.849024	ATP binding microtubule motor family protein
Leaf	Ciclev10024373m	10.1843	0.299248	5.08886	up	0.848954
Leaf	Ciclev10031848m	12.1825	1.32021	3.20597	up	0.848654	sulphotransferase 12
Leaf	Ciclev10019438m	24.2073	7.00592	1.7888	up	0.848307	Tetratricopeptide repeat (TPR)-like superfamily protein
Leaf	Ciclev10024737m	78.687	36.9483	1.09062	up	0.848214	Leucine-rich receptor-like protein kinase family protein
Leaf	Ciclev10016831m	78.1436	36.6667	1.09166	up	0.848075	Bifunctional inhibitor/lipid-transfer protein/seed storage 2S albumin superfamily protein
Leaf	Ciclev10014896m	13.9354	2.28837	2.60637	up	0.847844	Xanthine/uracil permease family protein
Leaf	Ciclev10030983m	61.0705	27.3372	1.15961	up	0.847798	DYNAMIN-like 1E
Leaf	Ciclev10000207m	41.3155	16.4058	1.33247	up	0.847405
Leaf	Ciclev10019086m	59.0196	26.2986	1.16621	up	0.847335	Protein kinase superfamily protein
Leaf	Ciclev10001122m	10.938	0.774524	3.81989	up	0.847197	Eukaryotic aspartyl protease family protein
Leaf	Ciclev10032502m	2458	1211.07	1.0212	up	0.847035	photosystem II subunit P-1
Leaf	Ciclev10001231m	23.2783	6.54825	1.8298	up	0.847011
Leaf	Ciclev10007959m	68.2047	31.421	1.11814	up	0.846965
Leaf	Ciclev10017170m	1531.81	753.225	1.02409	up	0.846688	photosystem I subunit K
Leaf	Ciclev10005327m	11.9021	1.2498	3.25144	up	0.846526	TRAF-like family protein
Leaf	Ciclev10020259m	9.86874	0.193631	5.67148	up	0.846433	Cytochrome b561/ferric reductase transmembrane with DOMON related domain
Leaf	Ciclev10019479m	55.7768	24.6792	1.17637	up	0.846294	fucosyltransferase 1
Leaf	Ciclev10024719m	54.7776	23.975	1.19205	up	0.846156	kinesin-like calmodulin-binding protein (ZWICHEL)
Leaf	Ciclev10028348m	12.8486	1.70747	2.91168	up	0.845947	Protein kinase superfamily protein
Leaf	Ciclev10015421m	16.7926	3.7318	2.16989	up	0.845786	Myzus persicae-induced lipase 1
Leaf	Ciclev10002696m	31.3942	10.8961	1.52668	up	0.845762	cold shock domain protein 1
Leaf	Ciclev10005408m	36.8632	14.1351	1.3829	up	0.845554	potassium channel beta subunit 1
Leaf	Ciclev10021716m	26.0654	8.36134	1.64033	up	0.844791	RNA binding (RRM/RBD/RNP motifs) family protein
Leaf	Ciclev10026803m	10.0616	0.404865	4.63527	up	0.844698
Leaf	Ciclev10014145m	16.9504	3.89022	2.12339	up	0.844536	Leucine-rich receptor-like protein kinase family protein
Leaf	Ciclev10016454m	28.3617	9.57593	1.56646	up	0.844421	early nodulin-like protein 18
Leaf	Ciclev10028905m	69.3967	32.5476	1.09231	up	0.844375	beta carbonic anhydrase 5
Leaf	Ciclev10023895m	10.7277	0.774524	3.79188	up	0.843935	P-loop nucleoside triphosphate hydrolases superfamily protein with CH (Calponin Homology) domain
Leaf	Ciclev10010956m	10.5874	0.721716	3.87478	up	0.843912	ATP binding microtubule motor family protein
Leaf	Ciclev10007919m	31.4117	11.1426	1.49522	up	0.843727	glucuronidase 3
Leaf	Ciclev10013885m	13.4271	2.18275	2.62093	up	0.843542	phytochrome kinase substrate 4
Leaf	Ciclev10025189m	15.9337	3.30933	2.26747	up	0.843519	Major facilitator superfamily protein
Leaf	Ciclev10031201m	58.1782	26.369	1.14164	up	0.843334	UDP-glucosyl transferase 74B1
Leaf	Ciclev10000203m	9.69345	0.211234	5.5201	up	0.843264	Actin-binding FH2 (formin homology 2) family protein
Leaf	Ciclev10026215m	25.2941	8.0797	1.64643	up	0.842917	pyridoxine biosynthesis 1.2
Leaf	Ciclev10007304m	68.4677	32.3364	1.08226	up	0.842802	NB-ARC domain-containing disease resistance protein
Leaf	Ciclev10011363m	9.65839	0.211234	5.51487	up	0.842732	laccase 17
Leaf	Ciclev10015894m	10.0791	0.492879	4.35399	up	0.842709
Leaf	Ciclev10025401m	55.8294	25.2072	1.14719	up	0.842617	Nucleotide-diphospho-sugar transferases superfamily protein
Leaf	Ciclev10005624m	30.5703	10.7377	1.50944	up	0.842501	phosphoenolpyruvate carboxylase kinase 2
Leaf	Ciclev10015793m	25.1714	8.04449	1.64571	up	0.842362	Peroxidase superfamily protein
Leaf	Ciclev10020342m	30.2373	10.5441	1.51989	up	0.842246	dehydroquinate dehydratase, putative / shikimate dehydrogenase, putative
Leaf	Ciclev10028941m	11.832	1.39062	3.08889	up	0.842085	fatty acid desaturase 3
Leaf	Ciclev10017057m	10.9731	0.950552	3.52906	up	0.841969	Thioredoxin superfamily protein
Leaf	Ciclev10026310m	66.6797	31.5795	1.07826	up	0.841761	Quinone reductase family protein
Leaf	Ciclev10012959m	12.9012	1.91871	2.7493	up	0.841553	Nuclear transport factor 2 (NTF2) family protein
Leaf	Ciclev10000692m	22.174	6.28421	1.81907	up	0.841529	Remorin family protein
Leaf	Ciclev10031834m	23.5763	7.12914	1.72554	up	0.841414	Squamosa promoter-binding protein-like (SBP domain) transcription factor family protein
Leaf	Ciclev10017351m	11.4989	1.21459	3.24295	up	0.841321
Leaf	Ciclev10008074m	32.2706	11.8819	1.44145	up	0.841252	effector of transcription2
Leaf	Ciclev10012285m	58.669	26.9499	1.12232	up	0.841113	Duplicated homeodomain-like superfamily protein
Leaf	Ciclev10011707m	24.0671	7.41079	1.69936	up	0.84109	TRICHOME BIREFRINGENCE-LIKE 33
Leaf	Ciclev10011553m	26.9944	8.95984	1.59112	up	0.841021	Eukaryotic aspartyl protease family protein
Leaf	Ciclev10027972m	25.0838	8.1149	1.62811	up	0.840928	ROP interactive partner 5
Leaf	Ciclev10019786m	20.8944	5.56249	1.90931	up	0.84072	phytochrome interacting factor 3-like 1
Leaf	Ciclev10011164m	64.6464	30.6641	1.07602	up	0.840465	basic helix-loop-helix (bHLH) DNA-binding superfamily protein
Leaf	Ciclev10011116m	12.463	1.74268	2.83827	up	0.840396	CRINKLY4 related 1
Leaf	Ciclev10019745m	43.9623	18.7822	1.2269	up	0.840118	nitrate transporter 1:2
Leaf	Ciclev10024805m	74.6553	36.5963	1.02855	up	0.840072	formin homolog 6
Leaf	Ciclev10007256m	21.1748	5.79133	1.87039	up	0.839818	tornado 1
Leaf	Ciclev10016590m	10.2894	0.704113	3.86921	up	0.839633	Cytochrome b561/ferric reductase transmembrane protein family
Leaf	Ciclev10002233m	9.20264	0.00880141	10.0301	up	0.839494	expansin 11
Leaf	Ciclev10008435m	260.04	129.68	1.00378	up	0.839286	fatty acyl-ACP thioesterases B
Leaf	Ciclev10030797m	41.3681	17.374	1.25159	up	0.839216	Leucine-rich repeat protein kinase family protein
Leaf	Ciclev10028444m	66.224	31.7907	1.05875	up	0.839193	Fasciclin-like arabinogalactan family protein
Leaf	Ciclev10001451m	16.0038	3.60858	2.14892	up	0.839101	Serine/threonine-protein kinase WNK (With No Lysine)-related
Leaf	Ciclev10009511m	32.1304	12.0051	1.42029	up	0.838869
Leaf	Ciclev10015896m	10.9205	1.03857	3.39437	up	0.838846	fatty acid desaturase family protein
Leaf	Ciclev10014812m	22.0688	6.44263	1.77629	up	0.838777	calcium ion binding
Leaf	Ciclev10027901m	61.7892	29.3263	1.07516	up	0.838384	auxin response factor 10
Leaf	Ciclev10007651m	33.4976	12.8325	1.38426	up	0.838268	Exostosin family protein
Leaf	Ciclev10019483m	20.0179	5.17523	1.9516	up	0.838014	O-fucosyltransferase family protein
Leaf	Ciclev10002398m	12.4981	1.8483	2.75744	up	0.837828	Vacuolar iron transporter (VIT) family protein
Leaf	Ciclev10007977m	57.5822	26.9323	1.09629	up	0.837759	organic cation/carnitine transporter4
Leaf	Ciclev10008720m	9.55322	0.369659	4.69172	up	0.837574	Basic-leucine zipper (bZIP) transcription factor family protein
Leaf	Ciclev10029311m	29.4309	10.5441	1.4809	up	0.837296	RAC-like 3
Leaf	Ciclev10004919m	11.1483	1.14418	3.28444	up	0.83725	IQ-domain 19
Leaf	Ciclev10012313m	39.0893	16.2474	1.26657	up	0.837204	Zinc finger, C3HC4 type (RING finger) family protein
Leaf	Ciclev10027911m	62.8409	30.0656	1.06359	up	0.837111	nucleobase-ascorbate transporter 12
Leaf	Ciclev10018228m	28.6071	10.0864	1.50396	up	0.836649	Bifunctional inhibitor/lipid-transfer protein/seed storage 2S albumin superfamily protein
Leaf	Ciclev10009526m	11.2886	1.2674	3.15492	up	0.836579	Integrase-type DNA-binding superfamily protein
Leaf	Ciclev10000597m	27.8007	9.55833	1.54029	up	0.836302	somatic embryogenesis receptor-like kinase 1
Leaf	Ciclev10009193m	48.9055	22.0387	1.14995	up	0.836256	tetraspanin2
Leaf	Ciclev10012108m	46.4514	20.7009	1.16603	up	0.836001	TPX2 (targeting protein for Xklp2) protein family
Leaf	Ciclev10008624m	14.286	2.74604	2.37918	up	0.835631	Plant protein of unknown function (DUF868)
Leaf	Ciclev10021138m	35.7063	14.3991	1.3102	up	0.835538	Leucine-rich repeat (LRR) family protein
Leaf	Ciclev10007404m	39.1945	16.5114	1.24718	up	0.835469	ARM repeat superfamily protein
Leaf	Ciclev10018793m	10.307	0.844935	3.60863	up	0.8354	Di-glucose binding protein with Kinesin motor domain
Leaf	Ciclev10007952m	46.6793	20.8593	1.16209	up	0.835307	Protein phosphatase 2A regulatory B subunit family protein
Leaf	Ciclev10014013m	153.044	75.7978	1.01372	up	0.835122	ARM repeat superfamily protein
Leaf	Ciclev10015790m	15.0923	3.18611	2.24395	up	0.835006	Peroxidase superfamily protein
Leaf	Ciclev10020137m	58.1607	27.7773	1.06614	up	0.835006	TRICHOME BIREFRINGENCE-LIKE 23
Leaf	Ciclev10031451m	15.4079	3.39734	2.18119	up	0.83496	serine carboxypeptidase-like 45
Leaf	Ciclev10015968m	11.7794	1.51384	2.95998	up	0.834868	Cyclin D6;1
Leaf	Ciclev10012388m	45.2945	20.1376	1.16944	up	0.834613	biotin carboxyl carrier protein 2
Leaf	Ciclev10032087m	19.2467	4.94639	1.96016	up	0.834359
Leaf	Ciclev10001310m	26.8892	9.18867	1.5491	up	0.834313	lysm domain GPI-anchored protein 1 precursor
Leaf	Ciclev10012575m	23.1381	7.39319	1.646	up	0.834243	abscisic acid (aba)-deficient 4
Leaf	Ciclev10019341m	20.6665	5.86174	1.81789	up	0.833711	S-adenosyl-L-methionine-dependent methyltransferases superfamily protein
Leaf	Ciclev10014716m	49.8871	22.9189	1.12213	up	0.833457	F-box/RNI-like superfamily protein
Leaf	Ciclev10020205m	53.2877	25.0136	1.09109	up	0.83341	RING domain ligase2
Leaf	Ciclev10002660m	27.8007	9.87518	1.49324	up	0.833202	Protein of unknown function (DUF1068)
Leaf	Ciclev10022668m	21.7884	6.60106	1.72279	up	0.833179
Leaf	Ciclev10027084m	9.74604	0.616099	3.98358	up	0.832994	Peroxidase superfamily protein
Leaf	Ciclev10014244m	42.5951	18.6062	1.19491	up	0.832948	Subtilase family protein
Leaf	Ciclev10031523m	9.9038	0.704113	3.8141	up	0.832809	FIZZY-related 3
Leaf	Ciclev10019472m	11.7093	1.56665	2.90189	up	0.832647	phosphoinositide 4-kinase gamma 4
Leaf	Ciclev10026007m	46.3463	21.0002	1.14205	up	0.8323	cinnamoyl coa reductase 1
Leaf	Ciclev10010893m	124.297	61.8035	1.00803	up	0.831537	guanyl-nucleotide exchange factors;GTPase binding;GTP binding
Leaf	Ciclev10017099m	13.5323	2.4644	2.4571	up	0.831467	Protein of unknown function, DUF538
Leaf	Ciclev10011610m	48.8354	22.6196	1.11035	up	0.831467	homolog of mamallian P58IPK
Leaf	Ciclev10028648m	10.3595	0.968155	3.41958	up	0.831375	serine carboxypeptidase-like 17
Leaf	Ciclev10031906m	10.3946	1.00336	3.37292	up	0.831259
Leaf	Ciclev10020441m	26.3108	9.13586	1.52604	up	0.831074	UBX domain-containing protein
Leaf	Ciclev10012880m	29.3082	10.9842	1.41588	up	0.831051	high mobility group A
Leaf	Ciclev10020350m	111.536	55.0616	1.01839	up	0.830635	ADP-glucose pyrophosphorylase family protein
Leaf	Ciclev10020148m	9.18511	0.387262	4.56792	up	0.830542
Leaf	Ciclev10028203m	57.6348	28.1997	1.03126	up	0.830334	Amidase family protein
Leaf	Ciclev10001235m	9.53569	0.598496	3.99392	up	0.829895	CYCLIN B2;4
Leaf	Ciclev10028159m	103.999	51.4002	1.01672	up	0.828946	synaptotagmin A
Leaf	Ciclev10007673m	21.1223	6.46024	1.70911	up	0.828715	receptor-like kinase 1
Leaf	Ciclev10014639m	8.72936	0.140823	5.95393	up	0.82853	nine-cis-epoxycarotenoid dioxygenase 5
Leaf	Ciclev10010809m	11.0432	1.40823	2.9712	up	0.827952	Auxin efflux carrier family protein
Leaf	Ciclev10014333m	103.841	51.7171	1.00566	up	0.827743	Raffinose synthase family protein
Leaf	Ciclev10017082m	26.6438	9.62874	1.46838	up	0.827743
Leaf	Ciclev10024114m	12.8837	2.21796	2.53824	up	0.827558	Glutaredoxin family protein
Leaf	Ciclev10001709m	45.4523	21.0354	1.11154	up	0.827142	Nucleotide-sugar transporter family protein
Leaf	Ciclev10010999m	101.054	50.0448	1.01383	up	0.827119	transmembrane kinase 1
Leaf	Ciclev10014620m	29.6763	11.4946	1.36835	up	0.827096	Protein of unknown function (DUF616)
Leaf	Ciclev10011487m	37.7396	16.3178	1.20963	up	0.827073	Protein kinase superfamily protein
Leaf	Ciclev10004403m	53.4805	26.1402	1.03274	up	0.826726	fatty alcohol oxidase 3
Leaf	Ciclev10032987m	45.1192	20.9122	1.1094	up	0.826656	RING/U-box superfamily protein
Leaf	Ciclev10002840m	8.53655	0.0528085	7.33674	up	0.826633	plantacyanin
Leaf	Ciclev10015776m	8.58913	0.12322	6.12321	up	0.826309	xyloglucan endotransglucosylase/hydrolase 8
Leaf	Ciclev10028404m	53.2176	26.0522	1.0305	up	0.826286	Exostosin family protein
Leaf	Ciclev10008801m	25.3642	8.90703	1.50978	up	0.826263	N-MYC downregulated-like 1
Leaf	Ciclev10014762m	27.8358	10.4737	1.41017	up	0.82624
Leaf	Ciclev10025838m	18.0722	4.77036	1.9216	up	0.825546	fatty acid desaturase 5
Leaf	Ciclev10021893m	44.3304	20.5953	1.10598	up	0.825476	FKBP-like peptidyl-prolyl cis-trans isomerase family protein
Leaf	Ciclev10009963m	42.7704	19.5919	1.12635	up	0.825384	pinoid-binding protein 1
Leaf	Ciclev10002336m	12.9363	2.39398	2.43394	up	0.824736	Protein of unknown function, DUF617
Leaf	Ciclev10029397m	27.8709	10.6321	1.39033	up	0.824713
Leaf	Ciclev10012128m	88.7135	43.9895	1.012	up	0.824066	adenosine kinase 2
Leaf	Ciclev10004956m	87.3287	43.2853	1.01258	up	0.823557	IQ-domain 24
Leaf	Ciclev10031300m	35.1278	15.0504	1.22281	up	0.82351	cycloartenol synthase 1
Leaf	Ciclev10014448m	28.2214	10.9137	1.37064	up	0.823464	Esterase/lipase/thioesterase family protein
Leaf	Ciclev10022798m	49.519	24.1511	1.03589	up	0.823395	histone H2A 11
Leaf	Ciclev10015864m	27.4677	10.4737	1.39097	up	0.823279	CCT motif family protein
Leaf	Ciclev10025938m	86.6626	43.0037	1.01095	up	0.823233	GDSL-like Lipase/Acylhydrolase superfamily protein
Leaf	Ciclev10027587m	34.6195	14.7512	1.23075	up	0.823233	Integrase-type DNA-binding superfamily protein
Leaf	Ciclev10010422m	27.7657	10.6321	1.38488	up	0.822909	Calcium-binding EF-hand family protein
Leaf	Ciclev10021527m	38.1603	16.9691	1.16916	up	0.822816	COBRA-like extracellular glycosyl-phosphatidyl inositol-anchored protein family
Leaf	Ciclev10015508m	8.53655	0.228837	5.22126	up	0.822678	Leucine-rich repeat (LRR) family protein
Leaf	Ciclev10018480m	81.4565	40.2401	1.0174	up	0.822377	myosin 2
Leaf	Ciclev10028117m	8.55408	0.264042	5.01777	up	0.822169	Laccase/Diphenol oxidase family protein
Leaf	Ciclev10030938m	49.1684	24.1511	1.02564	up	0.821914	Melibiase family protein
Leaf	Ciclev10025949m	8.9923	0.545687	4.04254	up	0.82159	Chalcone-flavanone isomerase family protein
Leaf	Ciclev10018724m	9.37793	0.756921	3.63105	up	0.821452	ATP binding microtubule motor family protein
Leaf	Ciclev10015299m	9.86874	0.985758	3.32356	up	0.821405	patatin-like protein 6
Leaf	Ciclev10005926m	39.4574	17.8669	1.14301	up	0.821382	Plant invertase/pectin methylesterase inhibitor superfamily protein
Leaf	Ciclev10000557m	21.9812	7.28757	1.59276	up	0.821151	ABC-2 type transporter family protein
Leaf	Ciclev10019937m	27.9936	11.0194	1.34505	up	0.820827	Rho GTPase activating protein with PAK-box/P21-Rho-binding domain
Leaf	Ciclev10021134m	82.8238	41.4018	1.00035	up	0.820758	copper chaperone for SOD1
Leaf	Ciclev10031775m	8.79948	0.475276	4.21058	up	0.820365	KAR-UP F-box 1
Leaf	Ciclev10032069m	39.7905	18.1661	1.13117	up	0.820226	UDP-galactose transporter 3
Leaf	Ciclev10018237m	41.5609	19.3631	1.10192	up	0.819532	CCCH-type zinc fingerfamily protein with RNA-binding domain
Leaf	Ciclev10005566m	29.5361	11.9699	1.30307	up	0.819532	HAD superfamily, subfamily IIIB acid phosphatase
Leaf	Ciclev10032008m	8.50149	0.316851	4.74584	up	0.819509	Calcium-dependent phosphotriesterase superfamily protein
Leaf	Ciclev10020563m	16.9329	4.3831	1.9498	up	0.819301	Protein of unknown function (DUF1645)
Leaf	Ciclev10028036m	8.83454	0.528085	4.06431	up	0.81893	laccase 17
Leaf	Ciclev10000139m	41.1577	19.1519	1.10368	up	0.818861	Spc97 / Spc98 family of spindle pole body (SBP) component
Leaf	Ciclev10027539m	25.9953	9.85758	1.39894	up	0.818861	MATE efflux family protein
Leaf	Ciclev10006056m	9.57075	0.93295	3.35876	up	0.818838	AWPM-19-like family protein
Leaf	Ciclev10016601m	8.65925	0.440071	4.29844	up	0.818653	SNF7 family protein
Leaf	Ciclev10030897m	41.7888	19.6976	1.0851	up	0.818398	Galactosyltransferase family protein
Leaf	Ciclev10009431m	8.72936	0.492879	4.14657	up	0.818213
Leaf	Ciclev10020627m	10.938	1.61946	2.75576	up	0.818121	Galactosyltransferase family protein
Leaf	Ciclev10025668m	28.1513	11.1602	1.33484	up	0.818028	Galactose oxidase/kelch repeat superfamily protein
Leaf	Ciclev10011642m	8.48396	0.352056	4.59086	up	0.817866	Cyclin family protein
Leaf	Ciclev10033091m	14.1984	3.45015	2.04099	up	0.817751
Leaf	Ciclev10018802m	15.3903	3.85502	1.99721	up	0.817612	Leucine-rich repeat protein kinase family protein
Leaf	Ciclev10007457m	12.9713	2.65803	2.2869	up	0.817566	Protein of unknown function (DUF630 and DUF632)
Leaf	Ciclev10033298m	29.4485	12.0051	1.29454	up	0.817543
Leaf	Ciclev10032888m	33.3048	14.4343	1.20623	up	0.81745	Protein of unknown function, DUF538
Leaf	Ciclev10013209m	8.43137	0.334454	4.65589	up	0.817381	basic helix-loop-helix (bHLH) DNA-binding family protein
Leaf	Ciclev10027982m	23.9444	8.64299	1.47009	up	0.817311
Leaf	Ciclev10014358m	8.22103	0.193631	5.40794	up	0.817288	Leucine-rich repeat protein kinase family protein
Leaf	Ciclev10000652m	17.8444	5.08722	1.81052	up	0.817265	O-fucosyltransferase family protein
Leaf	Ciclev10005297m	32.2005	13.7478	1.22788	up	0.817242	O-methyltransferase family protein
Leaf	Ciclev10007618m	8.79948	0.545687	4.01127	up	0.817219	Plant protein of unknown function (DUF936)
Leaf	Ciclev10022074m	8.16844	0.158425	5.68819	up	0.817172	Reticulon family protein
Leaf	Ciclev10015514m	8.78195	0.545687	4.00839	up	0.816987	Cyclin B1;4
Leaf	Ciclev10020489m	23.1205	8.1325	1.5074	up	0.816964	RNI-like superfamily protein
Leaf	Ciclev10001207m	38.0376	17.3916	1.12904	up	0.816825	TRICHOME BIREFRINGENCE-LIKE 14
Leaf	Ciclev10025501m	32.3232	13.8534	1.22233	up	0.816825	Ubiquitin-specific protease family C19-related protein
Leaf	Ciclev10014419m	13.4096	2.95727	2.18092	up	0.816756	Leucine-rich repeat protein kinase family protein
Leaf	Ciclev10012401m	12.9889	2.67563	2.27933	up	0.816687
Leaf	Ciclev10025654m	25.3467	9.57593	1.40431	up	0.816548	cation exchanger 2
Leaf	Ciclev10026624m	26.4861	10.3505	1.35554	up	0.816455	CAP (Cysteine-rich secretory proteins, Antigen 5, and Pathogenesis-related 1 protein) superfamily protein
Leaf	Ciclev10019952m	25.224	9.54073	1.40263	up	0.815993	Leucine-rich repeat (LRR) family protein
Leaf	Ciclev10028359m	34.6545	15.3849	1.17153	up	0.815715	arogenate dehydratase 6
Leaf	Ciclev10016797m	9.2377	0.827333	3.48099	up	0.815322	RAC-like 3
Leaf	Ciclev10030650m	35.864	16.1946	1.14702	up	0.815183	dual specificity protein phosphatase family protein
Leaf	Ciclev10028968m	18.4929	5.65051	1.71052	up	0.814605	Haloacid dehalogenase-like hydrolase (HAD) superfamily protein
Leaf	Ciclev10014081m	43.8922	21.4578	1.03246	up	0.814536	SCAR family protein
Leaf	Ciclev10007181m	9.25523	0.862538	3.42361	up	0.814489	Eukaryotic aspartyl protease family protein
Leaf	Ciclev10002795m	9.30782	0.915347	3.34605	up	0.814327	histone H2A 7
Leaf	Ciclev10019345m	12.6734	2.58761	2.2921	up	0.814212	S-adenosyl-L-methionine-dependent methyltransferases superfamily protein
Leaf	Ciclev10012001m	38.7387	18.0605	1.10094	up	0.814189	nodulin MtN21 /EamA-like transporter family protein
Leaf	Ciclev10019877m	8.13338	0.264042	4.94501	up	0.814119	O-acyltransferase (WSD1-like) family protein
Leaf	Ciclev10031290m	23.401	8.48456	1.46366	up	0.814119	Protein kinase superfamily protein
Leaf	Ciclev10014355m	13.2518	2.97488	2.15529	up	0.814027	Subtilisin-like serine endopeptidase family protein
Leaf	Ciclev10016171m	20.5438	6.8475	1.58505	up	0.814027	NOD26-like intrinsic protein 1;2
Leaf	Ciclev10023706m	9.22017	0.862538	3.41813	up	0.813657	Terpenoid cyclases/Protein prenyltransferases superfamily protein
Leaf	Ciclev10012786m	8.69431	0.598496	3.86066	up	0.813472	Gibberellin-regulated family protein
Leaf	Ciclev10017056m	39.7554	18.8702	1.07504	up	0.813356	MLP-like protein 28
Leaf	Ciclev10031467m	38.7913	18.1837	1.09309	up	0.813286	3-ketoacyl-CoA synthase 19
Leaf	Ciclev10007575m	24.0846	8.97744	1.42374	up	0.813263	Fibronectin type III domain-containing protein
Leaf	Ciclev10004505m	7.80034	0.0352056	7.79159	up	0.813263	ABC-2 type transporter family protein
Leaf	Ciclev10008310m	22.6473	8.06209	1.49011	up	0.813171	zinc finger protein-related
Leaf	Ciclev10014459m	8.55408	0.528085	4.01777	up	0.812778	tetratricopeptide repeat (TPR)-containing protein
Leaf	Ciclev10025357m	7.99315	0.211234	5.24185	up	0.812685	Tetratricopeptide repeat (TPR)-like superfamily protein
Leaf	Ciclev10032710m	17.4061	5.06961	1.77965	up	0.812361	Leucine-rich repeat (LRR) family protein
Leaf	Ciclev10027280m	24.1547	9.11826	1.40548	up	0.812246	MATE efflux family protein
Leaf	Ciclev10025359m	7.76528	0.0528085	7.20012	up	0.811829	Pyridoxal phosphate (PLP)-dependent transferases superfamily protein
Leaf	Ciclev10029271m	8.29114	0.440071	4.23576	up	0.811737	Late embryogenesis abundant (LEA) hydroxyproline-rich glycoprotein family
Leaf	Ciclev10014824m	31.0261	13.4486	1.20603	up	0.811528	O-acetyltransferase family protein
Leaf	Ciclev10002683m	11.5515	1.98912	2.53788	up	0.811367	Chaperone DnaJ-domain superfamily protein
Leaf	Ciclev10028271m	7.81786	0.12322	5.98747	up	0.811135	like AUXIN RESISTANT 2
Leaf	Ciclev10014913m	18.4403	5.79133	1.6709	up	0.810904	sugar transporter 1
Leaf	Ciclev10028397m	23.8392	8.99504	1.40614	up	0.810765	Protein kinase superfamily protein
Leaf	Ciclev10014952m	13.5498	3.32693	2.02601	up	0.810349	TPX2 (targeting protein for Xklp2) protein family
Leaf	Ciclev10017183m	28.5194	11.9875	1.25041	up	0.809724	B-box type zinc finger family protein
Leaf	Ciclev10002604m	7.73022	0.12322	5.9712	up	0.809585	cell wall / vacuolar inhibitor of fructosidase 2
Leaf	Ciclev10026997m	19.8251	6.61866	1.58272	up	0.809562	Regulator of Vps4 activity in the MVB pathway protein
Leaf	Ciclev10031448m	23.2432	8.66059	1.42427	up	0.809285	NHL domain-containing protein
Leaf	Ciclev10000080m	14.3035	3.52056	2.02249	up	0.809123	P-loop containing nucleoside triphosphate hydrolases superfamily protein
Leaf	Ciclev10031937m	16.4946	4.62954	1.83306	up	0.808521	Homeodomain-like superfamily protein
Leaf	Ciclev10028916m	40.2813	19.7152	1.0308	up	0.808267	uncoupling protein 2
Leaf	Ciclev10000171m	30.1321	13.1141	1.20018	up	0.808198	glycosyl hydrolase family 10 protein / carbohydrate-binding domain-containing protein
Leaf	Ciclev10032177m	17.5639	5.36886	1.70993	up	0.807966	SGNH hydrolase-type esterase superfamily protein
Leaf	Ciclev10025388m	55.3561	27.2492	1.02253	up	0.807897	Cytochrome P450 superfamily protein
Leaf	Ciclev10009223m	11.7443	2.28837	2.35957	up	0.807804	Concanavalin A-like lectin protein kinase family protein
Leaf	Ciclev10014860m	26.0479	10.5441	1.30473	up	0.807758	non-specific phospholipase C2
Leaf	Ciclev10011852m	7.69516	0.176028	5.45007	up	0.807642	Glutaredoxin family protein
Leaf	Ciclev10011665m	38.616	18.6414	1.05069	up	0.807596	UDP-glucuronic acid decarboxylase 1
Leaf	Ciclev10029550m	9.27276	1.02096	3.18307	up	0.807203
Leaf	Ciclev10014825m	7.78281	0.264042	4.88145	up	0.807018	SKU5 similar 4
Leaf	Ciclev10019199m	55.8294	27.7596	1.00803	up	0.806972	Protein kinase superfamily protein
Leaf	Ciclev10018941m	9.9038	1.35542	2.86924	up	0.806879	Raffinose synthase family protein
Leaf	Ciclev10021834m	23.7341	9.13586	1.37735	up	0.806833	Plant-specific transcription factor YABBY family protein
Leaf	Ciclev10011549m	18.3878	5.98496	1.61933	up	0.80674	O-Glycosyl hydrolases family 17 protein
Leaf	Ciclev10031199m	12.6909	2.90447	2.12745	up	0.806	Glucose-methanol-choline (GMC) oxidoreductase family protein
Leaf	Ciclev10025325m	8.23856	0.545687	3.91624	up	0.805792	Seven transmembrane MLO family protein
Leaf	Ciclev10019961m	37.6169	18.1133	1.05433	up	0.80563	nuclear transport factor 2 (NTF2) family protein / RNA recognition motif (RRM)-containing protein
Leaf	Ciclev10031553m	19.2467	6.51304	1.5632	up	0.805121	alpha/beta-Hydrolases superfamily protein
Leaf	Ciclev10005038m	12.7435	2.97488	2.09886	up	0.805075	Eukaryotic aspartyl protease family protein
Leaf	Ciclev10017132m	12.4981	2.81645	2.14975	up	0.805006	Histone superfamily protein
Leaf	Ciclev10008531m	23.2958	8.97744	1.3757	up	0.804982	Protein phosphatase 2C family protein
Leaf	Ciclev10012288m	17.932	5.75612	1.63937	up	0.804982	Protein of unknown function (DUF1191)
Leaf	Ciclev10006049m	21.4728	7.81565	1.45807	up	0.804913
Leaf	Ciclev10025564m	7.6601	0.24644	4.95806	up	0.804728	Cyclin B2;3
Leaf	Ciclev10021747m	17.2834	5.31605	1.70096	up	0.804312	novel plant snare 11
Leaf	Ciclev10020261m	17.6165	5.58009	1.65856	up	0.804196	EXS (ERD1/XPR1/SYG1) family protein
Leaf	Ciclev10006617m	7.32706	0.00880141	9.70128	up	0.804103	TPX2 (targeting protein for Xklp2) protein family
Leaf	Ciclev10030205m	7.6601	0.281645	4.76541	up	0.803803	FASCICLIN-like arabinogalactan-protein 11
Leaf	Ciclev10031276m	29.4309	12.9029	1.18964	up	0.80371	O-fucosyltransferase family protein
Leaf	Ciclev10028165m	32.516	14.9448	1.12151	up	0.803294	Ankyrin repeat family protein
Leaf	Ciclev10029305m	7.90551	0.440071	4.16705	up	0.803248	Late embryogenesis abundant (LEA) hydroxyproline-rich glycoprotein family
Leaf	Ciclev10019471m	26.5036	11.1074	1.25467	up	0.803224	Glycosyl hydrolase family 47 protein
Leaf	Ciclev10014250m	29.1154	12.7444	1.19191	up	0.802924	hercules receptor kinase 2
Leaf	Ciclev10009046m	10.9906	1.95391	2.49183	up	0.802878	Protein of unknown function, DUF599
Leaf	Ciclev10025985m	25.9953	10.8081	1.26613	up	0.802831	ARIA-interacting double AP2 domain protein
Leaf	Ciclev10011638m	12.5682	2.95727	2.08744	up	0.802322	Protein kinase superfamily protein
Leaf	Ciclev10003017m	9.16758	1.10898	3.04731	up	0.802299
Leaf	Ciclev10000066m	32.4985	15.0152	1.11395	up	0.80223	NB-ARC domain-containing disease resistance protein
Leaf	Ciclev10012467m	8.79948	0.897744	3.29304	up	0.802207	ovate family protein 13
Leaf	Ciclev10010212m	8.01068	0.528085	3.92308	up	0.801698	homeobox gene 1
Leaf	Ciclev10012515m	25.6447	10.6321	1.27023	up	0.801513	Protein of unknown function (DUF1997)
Leaf	Ciclev10004937m	16.2492	4.78797	1.76289	up	0.801328	Transducin/WD40 repeat-like superfamily protein
Leaf	Ciclev10030911m	25.3116	10.4561	1.27546	up	0.800703	pseudo-response regulator 7
Leaf	Ciclev10027734m	12.165	2.76364	2.1381	up	0.800495	Plant protein of unknown function (DUF869)
Leaf	Ciclev10018997m	21.9461	8.36134	1.39216	up	0.800379	alpha/beta-Hydrolases superfamily protein
Leaf	Ciclev10019223m	18.4579	6.2314	1.56661	up	0.800148	Protein of unknown function (DUF3527)
Leaf	Ciclev10006399m	29.4134	13.1493	1.16149	up	0.800148
Leaf	Ciclev10003574m	22.9102	683.412	-4.89869	down	0.997317	phloem protein 2-B15
Leaf	Ciclev10028831m	12.5682	294.548	-4.55066	down	0.994356	basic chitinase
Leaf	Ciclev10010063m	5.36383	189.635	-5.14382	down	0.993546
Leaf	Ciclev10022211m	72.6571	1095.79	-3.91473	down	0.993199	Kunitz family trypsin and protease inhibitor protein
Leaf	Ciclev10032613m	45.4348	694.185	-3.93345	down	0.99276	Ankyrin repeat family protein
Leaf	Ciclev10022906m	8.48396	179.267	-4.40123	down	0.991048	Serine protease inhibitor, potato inhibitor I-type family protein
Leaf	Ciclev10011940m	10.2018	179.355	-4.13593	down	0.989684	zinc transporter 1 precursor
Leaf	Ciclev10022156m	1.45489	105.881	-6.18539	down	0.989568	Kunitz family trypsin and protease inhibitor protein
Leaf	Ciclev10022129m	6.57332	140.559	-4.41841	down	0.989013	Kunitz family trypsin and protease inhibitor protein
Leaf	Ciclev10026421m	8.93971	132.004	-3.88421	down	0.985312	F-box/RNI-like superfamily protein
Leaf	Ciclev10022124m	6.41556	111.32	-4.117	down	0.985266	Kunitz family trypsin and protease inhibitor protein
Leaf	Ciclev10022909m	0.981615	76.8187	-6.29016	down	0.985242	Serine protease inhibitor, potato inhibitor I-type family protein
Leaf	Ciclev10028964m	5.43394	97.062	-4.15884	down	0.984178	basic chitinase
Leaf	Ciclev10015713m	2.15605	66.3098	-4.94276	down	0.981079	zinc transporter 1 precursor
Leaf	Ciclev10029896m	8.3262	90.4257	-3.441	down	0.975689	NmrA-like negative transcriptional regulator family protein
Leaf	Ciclev10015210m	195.341	1307.91	-2.74319	down	0.974625	glucose-6-phosphate/phosphate translocator 2
Leaf	Ciclev10026815m	0.45575	46.0138	-6.65768	down	0.973446	RING-box 1
Leaf	Ciclev10028247m	45.4348	284.69	-2.64753	down	0.970554	UDP-Glycosyltransferase superfamily protein
Leaf	Ciclev10026074m	21.7007	158.021	-2.8643	down	0.969791	alpha/beta-Hydrolases superfamily protein
Leaf	Ciclev10006614m	5.90722	64.5495	-3.44986	down	0.969375	Copper amine oxidase family protein
Leaf	Ciclev10025102m	20.2633	138.763	-2.77568	down	0.967755	heat shock protein 70B
Leaf	Ciclev10012556m	0.543394	38.515	-6.14728	down	0.966853	myb-like HTH transcriptional regulator family protein
Leaf	Ciclev10014325m	0.15776	36.8955	-7.86957	down	0.966021	Glycosyl hydrolase family protein
Leaf	Ciclev10016018m	1.1569	38.4974	-5.05642	down	0.965512	Protein of unknown function (DUF506)
Leaf	Ciclev10013253m	8.53655	70.4465	-3.0448	down	0.964702
Leaf	Ciclev10005701m	41.2103	248.094	-2.58981	down	0.964494	ethylene-responsive element binding protein
Leaf	Ciclev10030504m	17.8268	115.14	-2.69127	down	0.964355	multidrug resistance-associated protein 3
Leaf	Ciclev10025330m	2.87473	43.1093	-3.9065	down	0.963638	Plant protein of unknown function (DUF247)
Leaf	Ciclev10009990m	6.43309	60.2545	-3.22749	down	0.963384
Leaf	Ciclev10031237m	12.3228	88.2605	-2.84044	down	0.963268	cytochrome P450, family 78, subfamily A, polypeptide 5
Leaf	Ciclev10026154m	75.339	415.831	-2.46453	down	0.960909	myo-inositol oxygenase 1
Leaf	Ciclev10008419m	77.7054	415.62	-2.41918	down	0.960307	zinc transporter 4 precursor
Leaf	Ciclev10012964m	152.185	766.022	-2.33156	down	0.958665
Leaf	Ciclev10002663m	29.7815	160.467	-2.42979	down	0.955218	copper/zinc superoxide dismutase 1
Leaf	Ciclev10014849m	30.7281	164.586	-2.42122	down	0.955033	Major facilitator superfamily protein
Leaf	Ciclev10012062m	7.97562	57.2796	-2.84435	down	0.953553	zinc transporter 1 precursor
Leaf	Ciclev10022041m	111.571	502.261	-2.17048	down	0.953345	Kunitz family trypsin and protease inhibitor protein
Leaf	Ciclev10009715m	27.2924	140.259	-2.36152	down	0.952998	hemoglobin 3
Leaf	Ciclev10022001m	397.449	1690.75	-2.08882	down	0.952766	Kunitz family trypsin and protease inhibitor protein
Leaf	Ciclev10003524m	9.53569	61.1522	-2.681	down	0.952119	lipid transfer protein 1
Leaf	Ciclev10015727m	155.796	670.016	-2.10453	down	0.952026	thiazole biosynthetic enzyme, chloroplast (ARA6) (THI1) (THI4)
Leaf	Ciclev10013191m	230.154	959.671	-2.05994	down	0.95161	Bifunctional inhibitor/lipid-transfer protein/seed storage 2S albumin superfamily protein
Leaf	Ciclev10023287m	1.85806	31.1746	-4.0685	down	0.951402	Kunitz family trypsin and protease inhibitor protein
Leaf	Ciclev10022911m	6.27533	48.971	-2.96417	down	0.95006	Kunitz family trypsin and protease inhibitor protein
Leaf	Ciclev10012862m	81.9123	348.008	-2.08697	down	0.950037
Leaf	Ciclev10000885m	8.16844	53.8118	-2.71979	down	0.949227
Leaf	Ciclev10028125m	59.7909	257.388	-2.10595	down	0.949227	Major facilitator superfamily protein
Leaf	Ciclev10022063m	25.2415	119.664	-2.24512	down	0.946637	homolog of carrot EP3-3 chitinase
Leaf	Ciclev10012978m	0.280461	24.9256	-6.47368	down	0.946012	Late Embryogenesis Abundant 4-5
Leaf	Ciclev10004722m	35.5134	155.345	-2.12904	down	0.945943	ABC-2 type transporter family protein
Leaf	Ciclev10001722m	18.1248	90.5313	-2.32045	down	0.945688	alpha/beta-Hydrolases superfamily protein
Leaf	Ciclev10002984m	1.38478	26.3338	-4.24919	down	0.94363	GAST1 protein homolog 1
Leaf	Ciclev10000764m	5.94228	42.1236	-2.82554	down	0.943491	OPC-8:0 CoA ligase1
Leaf	Ciclev10017113m	13.7251	71.133	-2.3737	down	0.942658	CCR-like
Leaf	Ciclev10031274m	25.3818	110.669	-2.12439	down	0.941918	MATE efflux family protein
Leaf	Ciclev10012232m	11.9897	63.9511	-2.41517	down	0.940646	nuclear factor Y, subunit A10
Leaf	Ciclev10006006m	104.419	410.603	-1.97536	down	0.940021	Chlorophyll A-B binding family protein
Leaf	Ciclev10013661m	16.2668	77.3116	-2.24876	down	0.939374
Leaf	Ciclev10014991m	20.8067	90.0736	-2.11405	down	0.938703	hydroperoxide lyase 1
Leaf	Ciclev10001827m	17.7742	81.237	-2.19235	down	0.938518	Protein of unknown function (DUF1644)
Leaf	Ciclev10019727m	19.5622	85.3737	-2.12572	down	0.937963	cytochrome P450, family 82, subfamily G, polypeptide 1
Leaf	Ciclev10011227m	18.5455	81.325	-2.13263	down	0.936806	FTSH protease 6
Leaf	Ciclev10023557m	3.47071	30.0832	-3.11566	down	0.934701	Kunitz family trypsin and protease inhibitor protein
Leaf	Ciclev10008211m	4.50491	33.7622	-2.90584	down	0.934447	amino acid permease 2
Leaf	Ciclev10023013m	17.9145	75.5337	-2.07599	down	0.933822	Thioredoxin superfamily protein
Leaf	Ciclev10000751m	4.94313	34.3255	-2.79578	down	0.933313	MATE efflux family protein
Leaf	Ciclev10008748m	459.834	1724.44	-1.90694	down	0.931417	Cysteine proteinases superfamily protein
Leaf	Ciclev10001648m	15.18	63.4054	-2.06244	down	0.928965	senescence-related gene 1
Leaf	Ciclev10005144m	7.46729	42.0003	-2.49174	down	0.928595	nuclear factor Y, subunit A1
Leaf	Ciclev10033287m	256.903	918.814	-1.83855	down	0.928433
Leaf	Ciclev10026628m	152.291	547.729	-1.84664	down	0.928132
Leaf	Ciclev10001373m	61.3159	238.571	-1.96009	down	0.927878	zinc induced facilitator-like 1
Leaf	Ciclev10000298m	161.826	563.255	-1.79934	down	0.926305	Prolyl oligopeptidase family protein
Leaf	Ciclev10001348m	108.083	375.503	-1.79669	down	0.925102	alpha-amylase-like 2
Leaf	Ciclev10028195m	315.765	1050.92	-1.73474	down	0.924153	Glucose-1-phosphate adenylyltransferase family protein
Leaf	Ciclev10006308m	70.0102	246.387	-1.81529	down	0.923367	drought-induced 21
Leaf	Ciclev10028157m	148.329	495.889	-1.74122	down	0.923205	Tetratricopeptide repeat (TPR)-like superfamily protein
Leaf	Ciclev10000256m	55.3035	198.577	-1.84426	down	0.922604	starch branching enzyme 2.1
Leaf	Ciclev10013217m	11.4113	49.4991	-2.11694	down	0.922442
Leaf	Ciclev10032167m	50.5707	179.25	-1.8256	down	0.92184	myb-like transcription factor family protein
Leaf	Ciclev10012554m	46.0833	165.026	-1.84038	down	0.921424	ascorbate peroxidase 2
Leaf	Ciclev10008765m	255.22	814.201	-1.67364	down	0.921308	thiazole biosynthetic enzyme, chloroplast (ARA6) (THI1) (THI4)
Leaf	Ciclev10014164m	289.243	904.715	-1.64518	down	0.920661	phosphoenolpyruvate carboxylase 2
Leaf	Ciclev10005897m	134.762	435.723	-1.693	down	0.920661	Embryo-specific protein 3, (ATS3)
Leaf	Ciclev10025712m	54.7075	187.699	-1.77861	down	0.920175	Tetratricopeptide repeat (TPR)-like superfamily protein
Leaf	Ciclev10017285m	101.948	326.708	-1.68017	down	0.919111	cystatin B
Leaf	Ciclev10012464m	15.6357	63.0709	-2.01213	down	0.919088
Leaf	Ciclev10020092m	26.4335	100.037	-1.92009	down	0.918255	UDP-glucosyltransferase 74F2
Leaf	Ciclev10022024m	32.8491	117.798	-1.84239	down	0.917677	heat shock protein 21
Leaf	Ciclev10020377m	53.0949	176.539	-1.73334	down	0.917237	O-methyltransferase 1
Leaf	Ciclev10022829m	7.11671	35.5225	-2.31945	down	0.915734
Leaf	Ciclev10019346m	1467.8	4427.34	-1.59279	down	0.915711	UDP-Glycosyltransferase superfamily protein
Leaf	Ciclev10022706m	305.44	929.024	-1.60483	down	0.915155
Leaf	Ciclev10003746m	9.30782	40.1696	-2.10959	down	0.913814	LOB domain-containing protein 39
Leaf	Ciclev10005414m	21.1398	79.3887	-1.90897	down	0.913143	isopentenyltransferase 5
Leaf	Ciclev10024705m	108.416	328.469	-1.59918	down	0.912472	multidrug resistance-associated protein 6
Leaf	Ciclev10025820m	25.3467	89.1583	-1.81457	down	0.911663	PQ-loop repeat family protein / transmembrane family protein
Leaf	Ciclev10027727m	3.92646	25.1896	-2.68153	down	0.910899	Lecithin:cholesterol acyltransferase family protein
Leaf	Ciclev10019177m	8.4489	36.5963	-2.11486	down	0.909419	pseudo-response regulator 5
Leaf	Ciclev10019000m	26.714	89.704	-1.74758	down	0.908771	cellulose synthase like G3
Leaf	Ciclev10002768m	68.1872	201.183	-1.56093	down	0.90817	Heavy metal transport/detoxification superfamily protein
Leaf	Ciclev10017055m	19.9829	71.4675	-1.83852	down	0.907777	MLP-like protein 43
Leaf	Ciclev10017398m	35.4784	109.419	-1.62485	down	0.907175	Protein of unknown function (DUF 3339)
Leaf	Ciclev10032313m	33.6378	104.103	-1.62986	down	0.906921	homolog of Medicago truncatula MTN3
Leaf	Ciclev10033278m	120.721	353.253	-1.54903	down	0.906921
Leaf	Ciclev10022181m	5.62676	28.8334	-2.35737	down	0.905302	inhibitor/interactor with cyclin-dependent kinase
Leaf	Ciclev10031458m	138.197	385.959	-1.48172	down	0.904307
Leaf	Ciclev10032901m	6.85378	31.6147	-2.20562	down	0.904307	SAUR-like auxin-responsive protein family
Leaf	Ciclev10005965m	4.75032	27.0731	-2.51077	down	0.904261	NAD(P)-binding Rossmann-fold superfamily protein
Leaf	Ciclev10016585m	105.278	296.907	-1.4958	down	0.904099	COLD REGULATED 314 INNER MEMBRANE 1
Leaf	Ciclev10014983m	3.73364	23.2885	-2.64096	down	0.903521	MATE efflux family protein
Leaf	Ciclev10003896m	1.06926	16.8283	-3.97621	down	0.903359	Integrase-type DNA-binding superfamily protein
Leaf	Ciclev10010835m	512.386	1369.75	-1.41861	down	0.902989
Leaf	Ciclev10032406m	266.596	720.36	-1.43406	down	0.902942	Fe superoxide dismutase 2
Leaf	Ciclev10028054m	26.3459	82.5924	-1.64843	down	0.90278	phosphatidylinositol-speciwc phospholipase C4
Leaf	Ciclev10028400m	2.9799	21.5811	-2.85643	down	0.90248	Ankyrin repeat family protein
Leaf	Ciclev10015995m	9.78109	39.6063	-2.01766	down	0.901786	myosin heavy chain-related
Leaf	Ciclev10004229m	17.9846	61.5923	-1.77599	down	0.901138	Leucine-rich repeat protein kinase family protein
Leaf	Ciclev10024650m	62.4202	176.468	-1.49932	down	0.900421	cytochrome P450, family 72, subfamily A, polypeptide 15
Leaf	Ciclev10024910m	51.079	147.529	-1.5302	down	0.899889	heavy metal atpase 1
Leaf	Ciclev10033071m	96.7592	261.824	-1.43613	down	0.899843	thioredoxin H-type 7
Leaf	Ciclev10022130m	186.998	490.503	-1.39124	down	0.899704	glutathione peroxidase 6
Leaf	Ciclev10027337m	6.59084	29.8368	-2.17856	down	0.899334	BTB and TAZ domain protein 4
Leaf	Ciclev10025900m	5.53911	27.4604	-2.30963	down	0.898917	GDSL-like Lipase/Acylhydrolase family protein
Leaf	Ciclev10022521m	263.459	677.005	-1.36159	down	0.898224
Leaf	Ciclev10020963m	16.5472	56.2762	-1.76594	down	0.897021	alpha/beta-Hydrolases superfamily protein
Leaf	Ciclev10031994m	14.7067	51.9283	-1.82005	down	0.896697	NAD(P)-binding Rossmann-fold superfamily protein
Leaf	Ciclev10028170m	86.0491	229.189	-1.4133	down	0.896628	polyol/monosaccharide transporter 5
Leaf	Ciclev10006854m	0.806327	15.3321	-4.24904	down	0.896281	F-box family protein
Leaf	Ciclev10008943m	42.5425	120.315	-1.49984	down	0.89598	GATA type zinc finger transcription factor family protein
Leaf	Ciclev10005245m	13.7952	49.0415	-1.82984	down	0.895795	strictosidine synthase-like 2
Leaf	Ciclev10006188m	2.33134	18.9758	-3.02494	down	0.89561
Leaf	Ciclev10021925m	47.1351	130.824	-1.47276	down	0.895217	Protein of unknown function (DUF581)
Leaf	Ciclev10011949m	64.1731	171.047	-1.41435	down	0.894615	fatty acid desaturase 2
Leaf	Ciclev10022287m	84.0683	219.12	-1.38209	down	0.894014	CCT motif family protein
Leaf	Ciclev10011598m	38.0201	107.148	-1.49478	down	0.89369	UDP-Glycosyltransferase superfamily protein
Leaf	Ciclev10012921m	13.953	48.3726	-1.79362	down	0.893042
Leaf	Ciclev10010930m	52.9371	141.421	-1.41765	down	0.89288	ABC transporter family protein
Leaf	Ciclev10012482m	83.1919	212.36	-1.352	down	0.892441	UDP-Glycosyltransferase superfamily protein
Leaf	Ciclev10031498m	35.8465	100.723	-1.49049	down	0.892348	DNAJ heat shock N-terminal domain-containing protein
Leaf	Ciclev10019826m	126.593	318.347	-1.3304	down	0.892024	cytochrome P450, family 76, subfamily C, polypeptide 4
Leaf	Ciclev10005570m	5.8371	26.7387	-2.1956	down	0.892001	Integrase-type DNA-binding superfamily protein
Leaf	Ciclev10029499m	51.3595	136.439	-1.40956	down	0.891839	ferredoxin 3
Leaf	Ciclev10015358m	6.46814	27.8477	-2.10613	down	0.8914	Tyrosine transaminase family protein
Leaf	Ciclev10001713m	38.0025	104.314	-1.45677	down	0.891053	NAD(P)-linked oxidoreductase superfamily protein
Leaf	Ciclev10011084m	27.9936	82.17	-1.55352	down	0.890729
Leaf	Ciclev10021085m	15.9337	51.8579	-1.70248	down	0.890637	NAD(P)-binding Rossmann-fold superfamily protein
Leaf	Ciclev10022651m	10.9029	40.7329	-1.90148	down	0.890359	vacuolar ATPase subunit F family protein
Leaf	Ciclev10004927m	127.557	314.826	-1.30341	down	0.890266	ATP sulfurylase 1
Leaf	Ciclev10008336m	8.2035	32.618	-1.99136	down	0.890174	homogentisate phytyltransferase 1
Leaf	Ciclev10028769m	6.06498	26.8091	-2.14415	down	0.890012	NAD(P)-linked oxidoreductase superfamily protein
Leaf	Ciclev10006432m	30.7806	87.0988	-1.50063	down	0.889919	cellulose synthase family protein
Leaf	Ciclev10020828m	52.1658	136.175	-1.38429	down	0.889457	O-methyltransferase 1
Leaf	Ciclev10027815m	357.361	851.73	-1.25302	down	0.888855	alpha-glucan phosphorylase 2
Leaf	Ciclev10006198m	13.8303	46.2074	-1.7403	down	0.888138	Heavy metal transport/detoxification superfamily protein
Leaf	Ciclev10004694m	75.3916	188.773	-1.32418	down	0.887976	phosphate transporter 1;7
Leaf	Ciclev10028067m	214.588	508.651	-1.24511	down	0.887722	nitrite reductase 1
Leaf	Ciclev10019032m	85.1726	210.107	-1.30266	down	0.88756	Copper amine oxidase family protein
Leaf	Ciclev10024930m	7.95809	31.4562	-1.98285	down	0.887537	aminopeptidase M1
Leaf	Ciclev10032686m	39.0017	103.628	-1.4098	down	0.887514	glutathione S-transferase tau 7
Leaf	Ciclev10028239m	122.947	298.632	-1.28033	down	0.887213	cytochrome P450, family 76, subfamily C, polypeptide 4
Leaf	Ciclev10000220m	480.168	1123.1	-1.22587	down	0.886797	nitrate reductase 1
Leaf	Ciclev10023773m	2.89226	18.8878	-2.70719	down	0.88638	O-acyltransferase (WSD1-like) family protein
Leaf	Ciclev10033591m	45.0491	115.651	-1.3602	down	0.886057	cytochrome P450, family 71, subfamily B, polypeptide 35
Leaf	Ciclev10006286m	11.8846	41.1378	-1.79138	down	0.885895	Thioredoxin superfamily protein
Leaf	Ciclev10025657m	6.2578	26.2282	-2.06739	down	0.885155	GCR2-like 1
Leaf	Ciclev10028293m	37.2313	97.326	-1.38631	down	0.884877	UDP-glucosyl transferase 84B2
Leaf	Ciclev10004266m	12.2527	41.6483	-1.76516	down	0.884784	Leucine-rich repeat protein kinase family protein
Leaf	Ciclev10024853m	27.678	76.8187	-1.47272	down	0.884599	Leucine-rich repeat transmembrane protein kinase protein
Leaf	Ciclev10031853m	57.3894	142.442	-1.31152	down	0.884229	dual specificity protein phosphatase (DsPTP1) family protein
Leaf	Ciclev10028092m	12.1825	41.3138	-1.76181	down	0.884206	Seven transmembrane MLO family protein
Leaf	Ciclev10023018m	15.2501	47.4924	-1.63888	down	0.884044	Thioredoxin superfamily protein
Leaf	Ciclev10000645m	31.885	85.3561	-1.42062	down	0.883929	with no lysine (K) kinase 4
Leaf	Ciclev10033197m	158.145	370.522	-1.22831	down	0.883905	homolog of anti-oxidant 1
Leaf	Ciclev10000378m	272.503	625.833	-1.1995	down	0.883397	Esterase/lipase/thioesterase family protein
Leaf	Ciclev10004247m	12.1475	40.8033	-1.74803	down	0.88298	Leucine-rich repeat protein kinase family protein
Leaf	Ciclev10025686m	10.4121	37.1067	-1.83342	down	0.882518	FAD/NAD(P)-binding oxidoreductase family protein
Leaf	Ciclev10008633m	70.0978	168.582	-1.26601	down	0.882379	CCCH-type zinc finger family protein
Leaf	Ciclev10025910m	4.4348	22.3908	-2.33597	down	0.882356	mitogen-activated protein kinase kinase kinase 19
Leaf	Ciclev10015840m	44.7862	112.64	-1.3306	down	0.882032	Peptidase family M48 family protein
Leaf	Ciclev10009331m	372.733	842.401	-1.17636	down	0.881685	Protein of unknown function (DUF581)
Leaf	Ciclev10029517m	147.61	340.615	-1.20635	down	0.881523	outer plastid envelope protein 16-1
Leaf	Ciclev10015356m	13.3044	42.6692	-1.68129	down	0.881477	Tyrosine transaminase family protein
Leaf	Ciclev10015110m	20.8593	60.5185	-1.53668	down	0.881292	ACT domain repeat 6
Leaf	Ciclev10014199m	21.2975	60.9762	-1.51756	down	0.880598	lipoxygenase 2
Leaf	Ciclev10007994m	69.6947	165.238	-1.24542	down	0.880551	HXXXD-type acyl-transferase family protein
Leaf	Ciclev10021897m	55.4087	134.732	-1.28191	down	0.880158	expansin A1
Leaf	Ciclev10000247m	208.33	470.84	-1.17637	down	0.880112	trehalose phosphatase/synthase 5
Leaf	Ciclev10014194m	73.6913	174.426	-1.24305	down	0.880043	phosphate 2
Leaf	Ciclev10011621m	14.4613	44.2535	-1.61359	down	0.879811	PYRIMIDINE 4
Leaf	Ciclev10025392m	5.85463	24.5911	-2.07049	down	0.879765	Cytochrome P450 superfamily protein
Leaf	Ciclev10007443m	13.3044	41.8419	-1.65305	down	0.879094	S-locus lectin protein kinase family protein
Leaf	Ciclev10016980m	793.916	1748.82	-1.13933	down	0.878354
Leaf	Ciclev10006096m	76.3907	178.123	-1.2214	down	0.878308	PYR1-like 11
Leaf	Ciclev10021714m	10.2544	35.5401	-1.79321	down	0.877961	Nodulin MtN3 family protein
Leaf	Ciclev10016522m	49.3788	119.453	-1.27448	down	0.877938
Leaf	Ciclev10017265m	192.099	430.389	-1.16379	down	0.877637	Glutaredoxin family protein
Leaf	Ciclev10029528m	9.22017	33.3045	-1.85285	down	0.876897	pathogenesis-related 4
Leaf	Ciclev10006261m	131.081	294.126	-1.16598	down	0.876388	FK506-binding protein 12
Leaf	Ciclev10017206m	183.211	407.963	-1.15493	down	0.876365
Leaf	Ciclev10020378m	96.356	220.458	-1.19406	down	0.876226	malate dehydrogenase
Leaf	Ciclev10016974m	64.3133	150.17	-1.2234	down	0.876203	phloem protein 2-A9
Leaf	Ciclev10011894m	35.531	88.5598	-1.31757	down	0.876157	Protein kinase superfamily protein
Leaf	Ciclev10007341m	26.451	69.4255	-1.39214	down	0.87611	disease resistance family protein / LRR family protein
Leaf	Ciclev10004951m	32.814	83.1205	-1.34089	down	0.875763	CBL-interacting protein kinase 4
Leaf	Ciclev10016100m	24.5579	65.3769	-1.41259	down	0.875625	short-chain dehydrogenase-reductase B
Leaf	Ciclev10022741m	11.9547	38.1629	-1.6746	down	0.875324	basic helix-loop-helix (bHLH) DNA-binding superfamily protein
Leaf	Ciclev10020064m	6.90636	26.9675	-1.96522	down	0.875324	UDP-Glycosyltransferase superfamily protein
Leaf	Ciclev10015311m	19.9654	55.7305	-1.48097	down	0.875301
Leaf	Ciclev10033731m	9.15006	32.7941	-1.84158	down	0.875301	S-adenosyl-L-methionine-dependent methyltransferases superfamily protein
Leaf	Ciclev10000754m	12.3578	38.8846	-1.65377	down	0.875069	AMP-dependent synthetase and ligase family protein
Leaf	Ciclev10023029m	524.112	1129.75	-1.10805	down	0.874769	senescence-associated gene 21
Leaf	Ciclev10000444m	9.29029	32.8117	-1.82041	down	0.873982	solute:sodium symporters;urea transmembrane transporters
Leaf	Ciclev10025462m	1.73536	14.9976	-3.11143	down	0.873751	UDP-glucosyl transferase 72E1
Leaf	Ciclev10000967m	49.4839	116.407	-1.23415	down	0.873311	cytochrome P450, family 81, subfamily D, polypeptide 4
Leaf	Ciclev10016066m	8.90465	31.9315	-1.84235	down	0.873288	Molybdenum cofactor sulfurase family protein
Leaf	Ciclev10018887m	58.2483	133.729	-1.19902	down	0.87271	ATPase, AAA-type, CDC48 protein
Leaf	Ciclev10032932m	82.1226	183.298	-1.15834	down	0.872109	Calcium-binding EF hand family protein
Leaf	Ciclev10025921m	6.39803	25.5241	-1.99616	down	0.871947	Aldolase-type TIM barrel family protein
Leaf	Ciclev10004554m	279.988	595.398	-1.08849	down	0.871507
Leaf	Ciclev10022542m	113.552	249.362	-1.13489	down	0.870975	Adenine nucleotide alpha hydrolases-like superfamily protein
Leaf	Ciclev10031461m	68.345	154.007	-1.17209	down	0.870975
Leaf	Ciclev10019280m	17.4938	49.2703	-1.49388	down	0.870744	Leucine-rich repeat protein kinase family protein
Leaf	Ciclev10008874m	0.560923	12.2516	-4.44902	down	0.870073	gibberellin 2-oxidase 8
Leaf	Ciclev10002981m	49.2035	112.869	-1.19782	down	0.869657	homolog of anti-oxidant 1
Leaf	Ciclev10005411m	21.8234	57.0507	-1.38637	down	0.869657	Homeodomain-like superfamily protein
Leaf	Ciclev10025148m	177.988	379.006	-1.09044	down	0.86961	D-3-phosphoglycerate dehydrogenase
Leaf	Ciclev10001194m	269.576	564.998	-1.06755	down	0.869472	thylakoidal ascorbate peroxidase
Leaf	Ciclev10029475m	65.7507	147.3	-1.16368	down	0.869356	Ctr copper transporter family
Leaf	Ciclev10001623m	2.17358	15.5609	-2.83978	down	0.869102	senescence-related gene 1
Leaf	Ciclev10022132m	75.8999	167.808	-1.14464	down	0.868963	Putative thiol-disulphide oxidoreductase DCC
Leaf	Ciclev10012729m	10.0265	32.9701	-1.71734	down	0.868408	Protein of unknown function (DUF567)
Leaf	Ciclev10026216m	23.4361	59.6032	-1.34666	down	0.868153	GNS1/SUR4 membrane protein family
Leaf	Ciclev10022942m	36.3548	85.937	-1.24113	down	0.867598
Leaf	Ciclev10004729m	36.0568	85.3033	-1.24233	down	0.867413	Major facilitator superfamily protein
Leaf	Ciclev10020575m	26.0654	65.06	-1.31964	down	0.867205	AGAMOUS-like 65
Leaf	Ciclev10013197m	20.1056	53.0021	-1.39845	down	0.866904	PHYTOSULFOKINE 3 PRECURSOR
Leaf	Ciclev10012214m	72.0961	157.862	-1.13067	down	0.866788	NAD(P)-linked oxidoreductase superfamily protein
Leaf	Ciclev10001604m	227.121	471.527	-1.05388	down	0.866742
Leaf	Ciclev10012290m	57.9153	128.131	-1.1456	down	0.866395	ubiquitin 4
Leaf	Ciclev10001415m	16.9854	46.6299	-1.45696	down	0.866095	Plant stearoyl-acyl-carrier-protein desaturase family protein
Leaf	Ciclev10006173m	60.194	133.025	-1.144	down	0.866048	actin depolymerizing factor 6
Leaf	Ciclev10005525m	98.2316	209.157	-1.09032	down	0.865748
Leaf	Ciclev10009662m	9.53569	31.5091	-1.72436	down	0.865331	Uncharacterised protein family (UPF0497)
Leaf	Ciclev10020762m	35.9341	83.7366	-1.2205	down	0.864845	BTB and TAZ domain protein 1
Leaf	Ciclev10025476m	103.508	217.729	-1.0728	down	0.864105	UDP-glucosyl transferase 85A2
Leaf	Ciclev10032696m	5.99486	23.5526	-1.97409	down	0.863943	glutathione S-transferase tau 7
Leaf	Ciclev10007489m	42.5425	96.0762	-1.17527	down	0.863897	isoamylase 1
Leaf	Ciclev10009911m	56.3202	123.185	-1.1291	down	0.863319
Leaf	Ciclev10016256m	39.6502	90.7601	-1.19473	down	0.862879	alpha-crystallin domain 32.1
Leaf	Ciclev10029406m	115.62	238.923	-1.04715	down	0.862787
Leaf	Ciclev10010514m	44.4181	99.2271	-1.15959	down	0.862602	aldehyde dehydrogenase 2C4
Leaf	Ciclev10017616m	34.637	80.3393	-1.21379	down	0.86244
Leaf	Ciclev10028259m	133.955	274.446	-1.03477	down	0.861954	related to AP2.7
Leaf	Ciclev10014926m	17.1432	45.7321	-1.41557	down	0.861931	MATE efflux family protein
Leaf	Ciclev10015070m	10.3946	32.0899	-1.62629	down	0.861098	cytochrome P450, family 716, subfamily A, polypeptide 1
Leaf	Ciclev10015901m	31.324	73.1749	-1.22408	down	0.860936	NAD(P)-binding Rossmann-fold superfamily protein
Leaf	Ciclev10026553m	6.94142	25.9818	-1.9042	down	0.860589	Mannose-binding lectin superfamily protein
Leaf	Ciclev10005441m	40.8948	91.3058	-1.15879	down	0.860219	carboxyesterase 20
Leaf	Ciclev10032930m	84.191	174.426	-1.05088	down	0.859942	high mobility group B1
Leaf	Ciclev10000604m	84.5416	174.567	-1.04605	down	0.859895	Mannose-binding lectin superfamily protein
Leaf	Ciclev10005863m	13.5498	38.7086	-1.51438	down	0.859734	Integrase-type DNA-binding superfamily protein
Leaf	Ciclev10005594m	72.1137	150.768	-1.06399	down	0.859202	Remorin family protein
Leaf	Ciclev10020136m	17.003	44.5703	-1.3903	down	0.858739	methionine gamma-lyase
Leaf	Ciclev10009879m	4.71526	19.7152	-2.0639	down	0.858415	squamosa promoter binding protein-like 5
Leaf	Ciclev10031272m	8.76442	28.851	-1.71889	down	0.858415	cytochrome P450, family 87, subfamily A, polypeptide 6
Leaf	Ciclev10002362m	9.60581	30.2593	-1.6554	down	0.858276	homolog of carrot EP3-3 chitinase
Leaf	Ciclev10028480m	55.0406	116.918	-1.08693	down	0.857999	eukaryotic release factor 1-3
Leaf	Ciclev10019686m	28.9226	67.278	-1.21794	down	0.857976	beta vacuolar processing enzyme
Leaf	Ciclev10005443m	22.8226	55.4665	-1.28116	down	0.856773	carboxyesterase 20
Leaf	Ciclev10014316m	68.9409	141.28	-1.03513	down	0.856449	HEAT SHOCK PROTEIN 89.1
Leaf	Ciclev10029774m	17.1958	44.5351	-1.37289	down	0.856449
Leaf	Ciclev10030982m	62.613	129.768	-1.0514	down	0.856033	nitrate transporter 1.7
Leaf	Ciclev10022560m	19.1064	48.1789	-1.33434	down	0.855801	SAUR-like auxin-responsive protein family
Leaf	Ciclev10026020m	28.6421	65.8698	-1.20148	down	0.855339	nuclear factor Y, subunit A3
Leaf	Ciclev10018013m	29.6588	67.5772	-1.18808	down	0.854136	RPM1-interacting protein 4 (RIN4) family protein
Leaf	Ciclev10001562m	20.4036	50.0272	-1.29389	down	0.853789	Major facilitator superfamily protein
Leaf	Ciclev10022174m	51.9029	108.574	-1.06479	down	0.853442	SOUL heme-binding family protein
Leaf	Ciclev10001145m	30.6755	69.2143	-1.17398	down	0.853349	glycerol-3-phosphate acyltransferase 3
Leaf	Ciclev10028980m	30.5177	68.7566	-1.17185	down	0.853026	prohibitin 2
Leaf	Ciclev10020661m	56.9337	116.566	-1.03379	down	0.852054	Eukaryotic protein of unknown function (DUF914)
Leaf	Ciclev10013742m	33.708	74.0375	-1.13517	down	0.852031
Leaf	Ciclev10028894m	57.2317	116.654	-1.02735	down	0.852031	NmrA-like negative transcriptional regulator family protein
Leaf	Ciclev10020548m	40.3689	86.289	-1.09593	down	0.851985	SBP (S-ribonuclease binding protein) family protein
Leaf	Ciclev10029281m	40.2462	86.1306	-1.09767	down	0.851962	Leucine-rich repeat (LRR) family protein
Leaf	Ciclev10012028m	13.3745	36.5259	-1.44943	down	0.85136	senescence-related gene 1
Leaf	Ciclev10005403m	28.0987	63.2997	-1.17169	down	0.850597	heat shock transcription factor B2A
Leaf	Ciclev10026825m	8.81701	27.5836	-1.64545	down	0.850273	Chaperone DnaJ-domain superfamily protein
Leaf	Ciclev10019547m	3.22531	16.2122	-2.32957	down	0.849301	AMP-dependent synthetase and ligase family protein
Leaf	Ciclev10008296m	1.87559	13.3253	-2.82876	down	0.848862	MATE efflux family protein
Leaf	Ciclev10029019m	21.245	50.1856	-1.24015	down	0.848746	myb domain protein 48
Leaf	Ciclev10004525m	47.0124	96.5515	-1.03826	down	0.848469	cryptochrome 2
Leaf	Ciclev10025941m	43.9098	91.1122	-1.0531	down	0.848214	ENTH/ANTH/VHS superfamily protein
Leaf	Ciclev10019053m	2.24369	13.8534	-2.6263	down	0.847382	ferric reduction oxidase 2
Leaf	Ciclev10025940m	23.4711	53.759	-1.19562	down	0.84722	bZIP transcription factor family protein
Leaf	Ciclev10013297m	2026.98	4085.25	-1.01109	down	0.846202
Leaf	Ciclev10008037m	34.8123	73.879	-1.08557	down	0.846179	sugar transporter protein 7
Leaf	Ciclev10012795m	37.7221	78.9663	-1.06583	down	0.846109	UDP-Glycosyltransferase superfamily protein
Leaf	Ciclev10013050m	11.1483	31.7731	-1.51098	down	0.845554	RHO guanyl-nucleotide exchange factor 11
Leaf	Ciclev10020250m	0.999144	11.2306	-3.4906	down	0.845022	Eukaryotic aspartyl protease family protein
Leaf	Ciclev10006159m	40.5267	83.5782	-1.04425	down	0.844768	glycine-rich RNA-binding protein 2
Leaf	Ciclev10029987m	17.336	42.3172	-1.28747	down	0.844745
Leaf	Ciclev10017001m	5.55664	21.3698	-1.94329	down	0.844722	Heavy metal transport/detoxification superfamily protein
Leaf	Ciclev10001679m	13.4096	35.4345	-1.40189	down	0.844536	Homeodomain-like superfamily protein
Leaf	Ciclev10033033m	13.988	36.4554	-1.38194	down	0.844513
Leaf	Ciclev10013142m	26.2757	58.3005	-1.14978	down	0.844375
Leaf	Ciclev10014538m	22.8401	52.2804	-1.1947	down	0.844236	sulfate transporter 91
Leaf	Ciclev10019989m	1.29713	11.7411	-3.17817	down	0.842848	cytochrome P450, family 87, subfamily A, polypeptide 2
Leaf	Ciclev10024701m	33.6904	70.7985	-1.07138	down	0.842778	ABC-2 and Plant PDR ABC-type transporter family protein
Leaf	Ciclev10020545m	17.9671	43.0565	-1.26088	down	0.84264	B-box type zinc finger protein with CCT domain
Leaf	Ciclev10014162m	15.1975	38.3037	-1.33365	down	0.842455
Leaf	Ciclev10025944m	183.615	369.747	-1.00986	down	0.842339
Leaf	Ciclev10012918m	10.8679	30.7345	-1.49979	down	0.842316	SGNH hydrolase-type esterase superfamily protein
Leaf	Ciclev10030795m	2.55921	14.5047	-2.50275	down	0.841969	Pleckstrin homology (PH) and lipid-binding START domains-containing protein
Leaf	Ciclev10009699m	31.4818	66.7147	-1.08349	down	0.841923	Ribonuclease E inhibitor RraA/Dimethylmenaquinone methyltransferase
Leaf	Ciclev10026862m	6.5032	22.5492	-1.79386	down	0.84183	RAD-like 6
Leaf	Ciclev10001676m	35.6887	73.6854	-1.04591	down	0.841599	ARM repeat superfamily protein
Leaf	Ciclev10007237m	137.864	278.353	-1.01367	down	0.840581	alpha/beta-Hydrolases superfamily protein
Leaf	Ciclev10032949m	35.5485	73.1221	-1.04052	down	0.840419
Leaf	Ciclev10002246m	21.2625	48.5134	-1.19007	down	0.840327	Uncharacterised protein family (UPF0114)
Leaf	Ciclev10026585m	104.314	211.727	-1.02127	down	0.839702	Protein of unknown function (DUF581)
Leaf	Ciclev10008095m	15.4079	38.0573	-1.30451	down	0.83954	cytochrome P450, family 76, subfamily C, polypeptide 4
Leaf	Ciclev10025420m	24.2599	53.2837	-1.13512	down	0.839425	cytochrome P450, family 81, subfamily D, polypeptide 8
Leaf	Ciclev10027783m	13.7426	35.012	-1.34919	down	0.83917	Protein kinase family protein with leucine-rich repeat domain
Leaf	Ciclev10001753m	2.8572	14.6984	-2.36298	down	0.838754
Leaf	Ciclev10022807m	6.24027	21.7923	-1.80414	down	0.838731	Ribosomal protein S24e family protein
Leaf	Ciclev10000809m	13.0765	33.903	-1.37444	down	0.838453	cytochrome P450, family 82, subfamily C, polypeptide 4
Leaf	Ciclev10014699m	32.0953	66.3274	-1.04724	down	0.838222	pescadillo-related
Leaf	Ciclev10014848m	1.99829	12.6388	-2.66103	down	0.836788	alpha/beta-Hydrolases superfamily protein
Leaf	Ciclev10015546m	28.6071	60.2017	-1.07343	down	0.836672	Alternative oxidase family protein
Leaf	Ciclev10024715m	25.2415	54.3047	-1.10528	down	0.836603	pleiotropic drug resistance 12
Leaf	Ciclev10015702m	22.0338	48.9534	-1.15169	down	0.836441	gibberellin 2-oxidase 8
Leaf	Ciclev10029177m	83.9106	168.969	-1.00984	down	0.836232	Thioredoxin superfamily protein
Leaf	Ciclev10029240m	73.7088	148.797	-1.01343	down	0.834798	hemoglobin 1
Leaf	Ciclev10000981m	65.4352	131.475	-1.00666	down	0.832693	amino acid permease 6
Leaf	Ciclev10013792m	5.43394	19.7504	-1.86181	down	0.831861	Leucine-rich repeat protein kinase family protein
Leaf	Ciclev10019876m	21.6131	47.2108	-1.12721	down	0.831629	cytochrome P450, family 72, subfamily A, polypeptide 15
Leaf	Ciclev10012067m	8.34373	24.6616	-1.5635	down	0.831606	geranylgeranyl pyrophosphate synthase 1
Leaf	Ciclev10022297m	28.3792	58.1069	-1.03388	down	0.830658	Mitochondrial import inner membrane translocase subunit Tim17/Tim22/Tim23 family protein
Leaf	Ciclev10021717m	14.8119	35.6457	-1.26697	down	0.830288	syntaxin of plants 71
Leaf	Ciclev10018100m	0.999144	10.2272	-3.35558	down	0.8289	Pyridoxal phosphate (PLP)-dependent transferases superfamily protein
Leaf	Ciclev10017067m	6.36297	20.965	-1.72021	down	0.828692	glycine-rich protein
Leaf	Ciclev10026361m	5.01325	18.7294	-1.90149	down	0.828692	O-methyltransferase 1
Leaf	Ciclev10010007m	5.32877	19.2047	-1.84958	down	0.828553
Leaf	Ciclev10019932m	12.7259	31.9315	-1.32721	down	0.82853	cytochrome P450, family 72, subfamily A, polypeptide 15
Leaf	Ciclev10028300m	6.10004	20.5073	-1.74925	down	0.828437	UDP-Glycosyltransferase superfamily protein
Leaf	Ciclev10005724m	50.7635	102.396	-1.01229	down	0.827419	alpha/beta-Hydrolases superfamily protein
Leaf	Ciclev10008657m	19.4921	42.8453	-1.13625	down	0.827211	BREVIS RADIX-like 4
Leaf	Ciclev10026346m	49.7293	100.195	-1.01065	down	0.826934	pyrophosphorylase 2
Leaf	Ciclev10014993m	6.46814	20.965	-1.69656	down	0.826911	UDP-Glycosyltransferase superfamily protein
Leaf	Ciclev10027866m	3.646	15.1032	-2.05047	down	0.826101	Glycosyl hydrolase family protein with chitinase insertion domain
Leaf	Ciclev10021039m	6.15262	20.3313	-1.72443	down	0.825893	Protein of unknown function (DUF789)
Leaf	Ciclev10016257m	20.684	44.5879	-1.10814	down	0.8258	RING/U-box superfamily protein
Leaf	Ciclev10017248m	5.04831	18.5182	-1.87507	down	0.8258
Leaf	Ciclev10014094m	22.5421	47.51	-1.07561	down	0.825708	Homeodomain-like transcriptional regulator
Leaf	Ciclev10021848m	18.9837	41.7891	-1.13836	down	0.825523
Leaf	Ciclev10006194m	1.68277	11.4594	-2.76763	down	0.825523	Ribosomal protein S24e family protein
Leaf	Ciclev10025112m	48.9055	98.0125	-1.00297	down	0.82543	alpha/beta-Hydrolases superfamily protein
Leaf	Ciclev10027954m	7.46729	22.6372	-1.60004	down	0.825106	white-brown complex homolog protein 11
Leaf	Ciclev10025881m	23.2958	48.4078	-1.05517	down	0.824389	2-oxoglutarate (2OG) and Fe(II)-dependent oxygenase superfamily protein
Leaf	Ciclev10032869m	18.2651	40.5041	-1.14898	down	0.824366	ubiquitin-conjugating enzyme19
Leaf	Ciclev10009863m	14.584	34.4311	-1.23933	down	0.824251	RNA-binding (RRM/RBD/RNP motifs) family protein
Leaf	Ciclev10008047m	1.34972	10.7201	-2.98959	down	0.823649	cytochrome P450, family 71, subfamily B, polypeptide 34
Leaf	Ciclev10017104m	2.13852	12.4804	-2.54498	down	0.82321	squamosa promoter binding protein-like 3
Leaf	Ciclev10029583m	15.3903	35.6985	-1.21384	down	0.822955
Leaf	Ciclev10025246m	12.8136	31.3858	-1.29244	down	0.82284	GRAS family transcription factor
Leaf	Ciclev10004833m	8.64172	24.2743	-1.49004	down	0.820642	MATE efflux family protein
Leaf	Ciclev10012618m	16.4946	37.0715	-1.16831	down	0.820526	VQ motif-containing protein
Leaf	Ciclev10032428m	9.71098	25.929	-1.41688	down	0.820365	TRAM, LAG1 and CLN8 (TLC) lipid-sensing domain containing protein
Leaf	Ciclev10006980m	1.41984	10.7377	-2.91889	down	0.820203	NAD(P)-binding Rossmann-fold superfamily protein
Leaf	Ciclev10014816m	14.7067	34.0791	-1.21241	down	0.819416	Isocitrate/isopropylmalate dehydrogenase family protein
Leaf	Ciclev10023683m	9.74604	25.8233	-1.40579	down	0.819231	cytochrome P450, family 83, subfamily B, polypeptide 1
Leaf	Ciclev10028838m	22.7524	46.3658	-1.02704	down	0.818398	alpha/beta-Hydrolases superfamily protein
Leaf	Ciclev10024878m	22.0688	45.3449	-1.03893	down	0.817959
Leaf	Ciclev10005316m	2.13852	12.1459	-2.50579	down	0.817959	beta-1,3-glucanase 2
Leaf	Ciclev10011614m	5.43394	18.4654	-1.76475	down	0.817936	AAA-ATPase 1
Leaf	Ciclev10001304m	14.5139	33.4806	-1.20589	down	0.81789	purin 7
Leaf	Ciclev10009028m	10.605	27.0203	-1.34931	down	0.817566	RmlC-like cupins superfamily protein
Leaf	Ciclev10020843m	15.3202	34.8184	-1.18441	down	0.817265	senescence-related gene 1
Leaf	Ciclev10028133m	19.3869	41.1378	-1.08538	down	0.817219	MATE efflux family protein
Leaf	Ciclev10005561m	20.2809	42.3876	-1.06352	down	0.8159	xyloglucan endotransglucosylase/hydrolase 16
Leaf	Ciclev10004036m	10.9555	27.5308	-1.32939	down	0.81553	bZIP transcription factor family protein
Leaf	Ciclev10006723m	20.8593	43.1093	-1.04731	down	0.815461	Caleosin-related family protein
Leaf	Ciclev10032128m	20.6139	42.7925	-1.05374	down	0.815368	NAD(P)-binding Rossmann-fold superfamily protein
Leaf	Ciclev10015126m	12.2001	29.5023	-1.27394	down	0.815345	O-acyltransferase (WSD1-like) family protein
Leaf	Ciclev10002733m	12.2001	29.4319	-1.27049	down	0.815044	related to AP2 1
Leaf	Ciclev10016643m	6.87131	20.6481	-1.58735	down	0.81479
Leaf	Ciclev10006635m	17.301	37.582	-1.11919	down	0.814466
Leaf	Ciclev10025811m	8.0808	22.7781	-1.49507	down	0.814397	Calcium-dependent phosphotriesterase superfamily protein
Leaf	Ciclev10026181m	7.83539	22.4436	-1.51823	down	0.814374	Pathogenesis-related thaumatin superfamily protein
Leaf	Ciclev10022655m	6.04745	19.0815	-1.65777	down	0.814189
Leaf	Ciclev10001749m	13.5147	31.4386	-1.21801	down	0.814027	NAD(P)-linked oxidoreductase superfamily protein
Leaf	Ciclev10021095m	5.11842	17.5852	-1.78059	down	0.813703	chlorophyllase 1
Leaf	Ciclev10013937m	7.85292	22.338	-1.5082	down	0.813286
Leaf	Ciclev10010467m	19.3869	40.4337	-1.06048	down	0.812384	disease resistance family protein / LRR family protein
Leaf	Ciclev10011445m	18.9487	39.7472	-1.06875	down	0.812338	Ankyrin repeat family protein
Leaf	Ciclev10026347m	31.0962	62.4724	-1.00648	down	0.811945	S-adenosyl-L-methionine-dependent methyltransferases superfamily protein
Leaf	Ciclev10002292m	8.76442	23.6054	-1.42939	down	0.81176	PLATZ transcription factor family protein
Leaf	Ciclev10031613m	17.8444	37.9165	-1.08736	down	0.811343	DNA binding
Leaf	Ciclev10005279m	0.385635	8.18531	-4.40773	down	0.81132	O-methyltransferase family protein
Leaf	Ciclev10025255m	5.15348	17.4972	-1.76351	down	0.811205	phosphofructokinase 3
Leaf	Ciclev10019672m	5.64429	18.2365	-1.69197	down	0.81102	3-ketoacyl-CoA synthase 1
Leaf	Ciclev10014792m	7.83539	22.0563	-1.49312	down	0.810719	receptor like protein 27
Leaf	Ciclev10030544m	20.3685	41.6131	-1.0307	down	0.810696	ATPase E1-E2 type family protein / haloacid dehalogenase-like hydrolase family protein
Leaf	Ciclev10024950m	12.4279	29.2735	-1.23601	down	0.810557	HD-ZIP IV family of homeobox-leucine zipper protein with lipid-binding START domain
Leaf	Ciclev10023300m	11.8495	28.4286	-1.26252	down	0.810511	PETER PAN-like protein
Leaf	Ciclev10031826m	14.7768	32.9877	-1.15859	down	0.809747	urophorphyrin methylase 1
Leaf	Ciclev10018971m	9.46558	24.4151	-1.36701	down	0.808984	oligopeptide transporter 7
Leaf	Ciclev10021010m	0.946558	9.15347	-3.27356	down	0.807249	Peroxidase superfamily protein
Leaf	Ciclev10015371m	16.3544	35.1352	-1.10324	down	0.806972	Tyrosine transaminase family protein
Leaf	Ciclev10031002m	12.2001	28.587	-1.22847	down	0.806856	Rad21/Rec8-like family protein
Leaf	Ciclev10015897m	7.6601	21.3698	-1.48014	down	0.80637	Galactose oxidase/kelch repeat superfamily protein
Leaf	Ciclev10020850m	16.6173	35.4169	-1.09175	down	0.80637	Protein of unknown function (DUF506)
Leaf	Ciclev10005336m	5.53911	17.7084	-1.67671	down	0.806347	2-oxoglutarate (2OG) and Fe(II)-dependent oxygenase superfamily protein
Leaf	Ciclev10013843m	26.9243	54.3751	-1.01404	down	0.805861
Leaf	Ciclev10019676m	15.8461	34.1671	-1.10848	down	0.805815	GMP synthase (glutamine-hydrolyzing), putative / glutamine amidotransferase, putative
Leaf	Ciclev10025729m	4.41727	15.8777	-1.84578	down	0.804635	Aldolase-type TIM barrel family protein
Leaf	Ciclev10005736m	12.3578	28.6398	-1.2126	down	0.80445	indole-3-butyric acid response 10
Leaf	Ciclev10002776m	17.5464	36.473	-1.05566	down	0.804288	Cox19-like CHCH family protein
Leaf	Ciclev10008044m	25.2766	51.101	-1.01555	down	0.803479	sugar transporter 14
Leaf	Ciclev10024776m	15.2676	32.9349	-1.10914	down	0.803063
Leaf	Ciclev10028278m	10.8153	26.017	-1.26638	down	0.802878	cytochrome P450, family 76, subfamily C, polypeptide 4
Leaf	Ciclev10026241m	9.18511	23.3589	-1.34661	down	0.802692	2-oxoglutarate (2OG) and Fe(II)-dependent oxygenase superfamily protein
Leaf	Ciclev10005334m	1.1569	9.31189	-3.00881	down	0.802322	Cysteine proteinases superfamily protein
Leaf	Ciclev10007058m	8.9923	22.8661	-1.34645	down	0.800588	Leucine-rich repeat protein kinase family protein

## Sheet: Table S9
Table S9. Analysis of the differentially expressed genes of rootstocks.
Tissue type	Gene ID	Before-grafting	After-grafting	log2FoldChange	Regulation	Probability	Description
Stem	Ciclev10029528m	26.716	0.959044	4.79996	up	0.998816	pathogenesis-related 4
Stem	Ciclev10012590m	25.7702	1.73444	3.89316	up	0.998087	Pathogenesis-related thaumatin superfamily protein
Stem	Ciclev10022211m	2661.02	256.667	3.37401	up	0.997922	Kunitz family trypsin and protease inhibitor protein
Stem	Ciclev10017226m	16.2051	0.591751	4.77531	up	0.996416	Bifunctional inhibitor/lipid-transfer protein/seed storage 2S albumin superfamily protein
Stem	Ciclev10022041m	40.4932	4.69319	3.10904	up	0.995091	Kunitz family trypsin and protease inhibitor protein
Stem	Ciclev10022911m	624.676	82.2431	2.92514	up	0.994369	Kunitz family trypsin and protease inhibitor protein
Stem	Ciclev10026057m	11.6127	0.163242	6.15255	up	0.993162	basic chitinase
Stem	Ciclev10023557m	778.371	130.695	2.57425	up	0.988613	Kunitz family trypsin and protease inhibitor protein
Stem	Ciclev10022909m	67.843	11.5595	2.55312	up	0.988331	Serine protease inhibitor, potato inhibitor I-type family protein
Stem	Ciclev10022906m	434.837	79.0905	2.4589	up	0.987429	Serine protease inhibitor, potato inhibitor I-type family protein
Stem	Ciclev10022001m	34.1263	6.3052	2.43627	up	0.986339	Kunitz family trypsin and protease inhibitor protein
Stem	Ciclev10023013m	35.345	6.57047	2.42744	up	0.985728	Thioredoxin superfamily protein
Stem	Ciclev10005195m	19.1595	3.39746	2.49553	up	0.98412	beta-1,3-glucanase 3
Stem	Ciclev10022925m	52.7884	11.2127	2.23509	up	0.983296	Gibberellin-regulated family protein
Stem	Ciclev10022989m	13.4555	2.44862	2.45815	up	0.97994	Thioredoxin superfamily protein
Stem	Ciclev10028812m	17.1606	3.5199	2.2855	up	0.979336	Aldolase-type TIM barrel family protein
Stem	Ciclev10028959m	88.6405	21.1602	2.06661	up	0.976795	basic chitinase
Stem	Ciclev10027337m	81.6787	19.7012	2.05168	up	0.976662	BTB and TAZ domain protein 4
Stem	Ciclev10009575m	17.4726	4.3361	2.01063	up	0.970192	blue-copper-binding protein
Stem	Ciclev10012978m	161.739	44.973	1.84653	up	0.970098	Late Embryogenesis Abundant 4-5
Stem	Ciclev10025820m	84.5941	24.17	1.80734	up	0.968263	PQ-loop repeat family protein / transmembrane family protein
Stem	Ciclev10006212m	15.1033	3.78516	1.99644	up	0.966789	Serine protease inhibitor, potato inhibitor I-type family protein
Stem	Ciclev10028366m	21.8213	6.00933	1.86046	up	0.96675	Protein of unknown function (DUF1005)
Stem	Ciclev10006135m	10.7254	2.40781	2.15524	up	0.965221	histidine-containing phosphotransmitter 1
Stem	Ciclev10014929m	102.837	30.3935	1.75852	up	0.961551	beta-amylase 6
Stem	Ciclev10021652m	21.4508	6.17257	1.79709	up	0.961449	ethylene responsive element binding factor 1
Stem	Ciclev10000260m	49.6683	14.8856	1.73841	up	0.960907	beta-galactosidase 3
Stem	Ciclev10028964m	166.565	51.0028	1.70744	up	0.960688	basic chitinase
Stem	Ciclev10022100m	6.36698	0.765195	3.05671	up	0.960617	osmotin 34
Stem	Ciclev10015965m	51.5599	16.6914	1.62714	up	0.959417	ethylene-forming enzyme
Stem	Ciclev10020212m	352.183	117.075	1.58889	up	0.958751	D-mannose binding lectin protein with Apple-like carbohydrate-binding domain
Stem	Ciclev10022438m	7.77104	1.47938	2.39312	up	0.958586	Integrase-type DNA-binding superfamily protein
Stem	Ciclev10028831m	346.323	120.023	1.5288	up	0.956124	basic chitinase
Stem	Ciclev10025238m	26.4527	8.76403	1.59375	up	0.956092	pectin methylesterase 3
Stem	Ciclev10010000m	13.8748	3.97901	1.80198	up	0.955708	Xyloglucan endotransglucosylase/hydrolase family protein
Stem	Ciclev10006286m	56.0451	19.4564	1.52635	up	0.955544	Thioredoxin superfamily protein
Stem	Ciclev10006211m	10.4621	2.66288	1.97412	up	0.955528	Serine protease inhibitor, potato inhibitor I-type family protein
Stem	Ciclev10015469m	15.5128	4.50955	1.78241	up	0.955449	FASCICLIN-like arabinogalactan 2
Stem	Ciclev10001371m	19.4032	6.31541	1.61935	up	0.954179	Pectinacetylesterase family protein
Stem	Ciclev10031881m	77.0473	29.3427	1.39274	up	0.951481	Protein of unknown function, DUF642
Stem	Ciclev10015779m	21.3923	7.74377	1.46598	up	0.950211	peroxidase 2
Stem	Ciclev10006590m	7.00076	1.38755	2.33497	up	0.949466	Glutaredoxin family protein
Stem	Ciclev10028756m	17.0046	5.8767	1.53285	up	0.948823	EXORDIUM like 5
Stem	Ciclev10016109m	23.1181	8.73342	1.4044	up	0.948415	Protein of unknown function (DUF506)
Stem	Ciclev10015793m	158.531	66.2557	1.25865	up	0.94676	Peroxidase superfamily protein
Stem	Ciclev10011703m	42.3751	17.2016	1.30067	up	0.946666	FASCICLIN-like arabinogalactan protein 17 precursor
Stem	Ciclev10025088m	184.379	77.7642	1.2455	up	0.946462	phosphoenolpyruvate carboxykinase 1
Stem	Ciclev10032534m	18.0577	6.73371	1.42314	up	0.946337	tonoplast intrinsic protein 1;3
Stem	Ciclev10015790m	76.7743	32.5769	1.23677	up	0.946015	Peroxidase superfamily protein
Stem	Ciclev10022104m	13.3872	4.47894	1.57963	up	0.945835	osmotin 34
Stem	Ciclev10029149m	609.339	260.799	1.22431	up	0.945835	Pathogenesis-related thaumatin superfamily protein
Stem	Ciclev10007531m	54.017	23.4048	1.20661	up	0.944588	beta-galactosidase 12
Stem	Ciclev10013224m	13.6505	4.89725	1.47891	up	0.942377
Stem	Ciclev10005146m	12.6267	4.38712	1.52513	up	0.941538	S-adenosylmethionine synthetase family protein
Stem	Ciclev10005988m	5.05069	0.561143	3.17004	up	0.941491	PAR1 protein
Stem	Ciclev10026151m	20.466	8.92727	1.19694	up	0.938542	NOD26-like intrinsic protein 6;1
Stem	Ciclev10020821m	17.1509	7.23364	1.24549	up	0.937099	O-methyltransferase 1
Stem	Ciclev10011292m	16.6146	7.0806	1.23051	up	0.935844	Major facilitator superfamily protein
Stem	Ciclev10033998m	7.68328	2.08133	1.88422	up	0.935193
Stem	Ciclev10016019m	12.578	4.81563	1.3851	up	0.935037	strictosidine synthase-like 4
Stem	Ciclev10026710m	6.13298	1.34674	2.18711	up	0.934135	Protein of unknown function (DUF581)
Stem	Ciclev10029453m	15.5811	6.6827	1.22129	up	0.933649	HSP20-like chaperones superfamily protein
Stem	Ciclev10026662m	7.14701	1.83647	1.96041	up	0.933147	hydroxyproline-rich glycoprotein family protein
Stem	Ciclev10015995m	42.5603	18.7524	1.18244	up	0.932417	myosin heavy chain-related
Stem	Ciclev10022050m	94.1592	42.5652	1.14543	up	0.932417	homolog of carrot EP3-3 chitinase
Stem	Ciclev10022117m	4.1829	0.153039	4.77253	up	0.932159	RmlC-like cupins superfamily protein
Stem	Ciclev10012912m	9.05808	2.86693	1.6597	up	0.9319	Protein of unknown function, DUF584
Stem	Ciclev10012786m	14.8693	6.45824	1.20312	up	0.931429	Gibberellin-regulated family protein
Stem	Ciclev10009700m	43.5158	19.5992	1.15075	up	0.931398	myb domain protein 82
Stem	Ciclev10022113m	4.47541	0.428509	3.38462	up	0.93081	RmlC-like cupins superfamily protein
Stem	Ciclev10004839m	10.6571	3.95861	1.42876	up	0.929445	Major facilitator superfamily protein
Stem	Ciclev10032962m	24.8634	10.9882	1.17807	up	0.929265
Stem	Ciclev10005561m	4.97268	0.765195	2.70013	up	0.928363	xyloglucan endotransglucosylase/hydrolase 16
Stem	Ciclev10026154m	59.6137	27.1593	1.1342	up	0.928136	myo-inositol oxygenase 1
Stem	Ciclev10011828m	24.2101	10.8454	1.15853	up	0.92801	Transmembrane amino acid transporter family protein
Stem	Ciclev10031846m	22.2698	9.86591	1.17457	up	0.927289	related to ABI3/VP1 2
Stem	Ciclev10032304m	64.4109	30.1283	1.09619	up	0.926834	NAC-like, activated by AP3/PI
Stem	Ciclev10001976m	41.205	18.9972	1.11703	up	0.92663	NAC (No Apical Meristem) domain transcriptional regulator superfamily protein
Stem	Ciclev10025074m	6.28898	1.54059	2.02934	up	0.926395	Rhamnogalacturonate lyase family protein
Stem	Ciclev10005968m	60.7545	28.5979	1.08708	up	0.926387	Plant invertase/pectin methylesterase inhibitor superfamily protein
Stem	Ciclev10028909m	43.0673	20.0073	1.10607	up	0.926293	EXORDIUM like 2
Stem	Ciclev10015527m	20.9438	9.34558	1.16417	up	0.926254	Protein of unknown function, DUF642
Stem	Ciclev10031648m	12.7145	5.45839	1.21992	up	0.925948	PLC-like phosphodiesterases superfamily protein
Stem	Ciclev10029315m	67.5505	32.4341	1.05846	up	0.925673
Stem	Ciclev10033996m	20.076	9.0191	1.15442	up	0.925344
Stem	Ciclev10032842m	56.1328	27.0165	1.055	up	0.92532
Stem	Ciclev10007510m	62.8801	30.2711	1.05466	up	0.925179	Subtilase family protein
Stem	Ciclev10009083m	45.7682	21.956	1.05973	up	0.92496	SPX domain gene 2
Stem	Ciclev10016129m	18.1747	7.99884	1.18407	up	0.924818	xyloglucan endotransglucosylase/hydrolase 9
Stem	Ciclev10019938m	26.2285	12.0085	1.12708	up	0.924646	Eukaryotic aspartyl protease family protein
Stem	Ciclev10001525m	31.9909	14.9366	1.09881	up	0.92456	Protein kinase superfamily protein
Stem	Ciclev10018160m	9.27259	3.34645	1.47034	up	0.923791	Peroxidase superfamily protein
Stem	Ciclev10026284m	32.6052	15.5794	1.06547	up	0.923697	methyl esterase 1
Stem	Ciclev10027911m	29.0463	13.9776	1.05524	up	0.922419	nucleobase-ascorbate transporter 12
Stem	Ciclev10021499m	8.1513	2.70369	1.5921	up	0.921768	Bifunctional inhibitor/lipid-transfer protein/seed storage 2S albumin superfamily protein
Stem	Ciclev10015870m	247.23	121.013	1.03069	up	0.92136	Peroxidase superfamily protein
Stem	Ciclev10000437m	7.96604	2.59146	1.6201	up	0.921219	Cellulose-synthase-like C12
Stem	Ciclev10026500m	187.431	92.109	1.02495	up	0.920905	SEC14 cytosolic factor family protein / phosphoglyceride transfer family protein
Stem	Ciclev10021170m	16.0003	7.17243	1.15757	up	0.920584	MAP kinase kinase 9
Stem	Ciclev10004728m	21.7725	10.4577	1.05795	up	0.919337	phosphate starvation-induced gene 3
Stem	Ciclev10029410m	19.6957	9.30477	1.08184	up	0.918435	Protein of unknown function, DUF584
Stem	Ciclev10005248m	5.16769	1.09168	2.24297	up	0.9174	zinc transporter 1 precursor
Stem	Ciclev10008731m	8.2098	2.95875	1.47236	up	0.915102	copper ion binding;electron carriers
Stem	Ciclev10019888m	20.8853	10.274	1.02349	up	0.912804
Stem	Ciclev10033519m	20.427	10.121	1.01313	up	0.911863	senescence associated gene 20
Stem	Ciclev10022951m	19.2277	9.38639	1.03454	up	0.911793	response to low sulfur 2
Stem	Ciclev10006599m	5.78196	1.49978	1.94681	up	0.910295	Bifunctional inhibitor/lipid-transfer protein/seed storage 2S albumin superfamily protein
Stem	Ciclev10029367m	22.9718	11.4575	1.00357	up	0.909605	Bifunctional inhibitor/lipid-transfer protein/seed storage 2S albumin superfamily protein
Stem	Ciclev10026277m	6.68875	2.06092	1.69844	up	0.909197	methyl esterase 1
Stem	Ciclev10032169m	13.7675	6.40723	1.10349	up	0.908186	protodermal factor 1
Stem	Ciclev10005181m	7.18601	2.46903	1.54125	up	0.907354	beta-1,3-glucanase 2
Stem	Ciclev10009294m	8.33656	3.24443	1.36149	up	0.907213	tonoplast intrinsic protein 4;1
Stem	Ciclev10025339m	15.9126	7.81519	1.02582	up	0.906256	AINTEGUMENTA-like 6
Stem	Ciclev10029536m	4.99218	1.13249	2.14017	up	0.904359	pathogenesis-related 4
Stem	Ciclev10029695m	5.58696	1.49978	1.89731	up	0.904327	Gibberellin-regulated family protein
Stem	Ciclev10014829m	13.631	6.62148	1.04166	up	0.904233	FAD-binding Berberine family protein
Stem	Ciclev10029614m	17.3069	8.6518	1.00027	up	0.903457	Stress responsive A/B Barrel Domain
Stem	Ciclev10009593m	4.57292	0.948841	2.26888	up	0.901739	Integrase-type DNA-binding superfamily protein
Stem	Ciclev10026012m	6.97151	2.45883	1.5035	up	0.900618	cinnamoyl coa reductase 1
Stem	Ciclev10001872m	3.73439	0.428509	3.12347	up	0.900336	nicotianamine synthase 4
Stem	Ciclev10030462m	4.88493	1.13249	2.10884	up	0.899849	Tetratricopeptide repeat (TPR)-like superfamily protein
Stem	Ciclev10002683m	11.1252	5.05029	1.13939	up	0.899402	Chaperone DnaJ-domain superfamily protein
Stem	Ciclev10021095m	11.4469	5.34616	1.09838	up	0.898046	chlorophyllase 1
Stem	Ciclev10017361m	11.4079	5.40738	1.07704	up	0.896673
Stem	Ciclev10026223m	11.1057	5.36657	1.04922	up	0.89269	HAD superfamily, subfamily IIIB acid phosphatase
Stem	Ciclev10024643m	4.0659	0.74479	2.44867	up	0.892407	Leucine-rich repeat transmembrane protein kinase
Stem	Ciclev10007919m	10.0039	4.60137	1.12042	up	0.890596	glucuronidase 3
Stem	Ciclev10012265m	5.3237	1.55079	1.77942	up	0.886408	myb domain protein 43
Stem	Ciclev10020875m	6.01597	2.09153	1.52424	up	0.884934	O-methyltransferase 1
Stem	Ciclev10027204m	4.97268	1.39776	1.83091	up	0.884557
Stem	Ciclev10017421m	4.49491	1.10188	2.02833	up	0.883914
Stem	Ciclev10026210m	4.76792	1.28553	1.891	up	0.88262	xyloglucan endotransglucosylase/hydrolase 6
Stem	Ciclev10025379m	9.70161	4.7238	1.03828	up	0.881342	Lung seven transmembrane receptor family protein
Stem	Ciclev10026376m	3.9684	0.82641	2.26363	up	0.879931	jasmonate-zim-domain protein 1
Stem	Ciclev10013568m	8.35606	3.82597	1.127	up	0.87499	Major facilitator superfamily protein
Stem	Ciclev10023644m	3.66613	0.703979	2.38066	up	0.871626	nitrate transporter 1.5
Stem	Ciclev10007732m	3.18837	0.397901	3.00234	up	0.871163	sulfate transporter 3;5
Stem	Ciclev10014341m	4.86543	1.46917	1.72756	up	0.870371	chloride channel B
Stem	Ciclev10024109m	2.83735	0.142836	4.31211	up	0.869187	RmlC-like cupins superfamily protein
Stem	Ciclev10028972m	4.61192	1.32634	1.79792	up	0.868819	hydroxyproline-rich glycoprotein family protein
Stem	Ciclev10006770m	4.1634	1.07127	1.95844	up	0.865619	Bifunctional inhibitor/lipid-transfer protein/seed storage 2S albumin superfamily protein
Stem	Ciclev10015715m	2.83735	0.193849	3.87154	up	0.865007	2-oxoglutarate (2OG) and Fe(II)-dependent oxygenase superfamily protein
Stem	Ciclev10023301m	6.20123	2.58126	1.26448	up	0.864811	GDSL-like Lipase/Acylhydrolase superfamily protein
Stem	Ciclev10014913m	5.78196	2.29558	1.3327	up	0.861667	sugar transporter 1
Stem	Ciclev10019672m	6.97151	3.1424	1.1496	up	0.858302	3-ketoacyl-CoA synthase 1
Stem	Ciclev10031707m	5.33345	2.00991	1.40794	up	0.857902
Stem	Ciclev10029431m	2.64235	0.112229	4.55731	up	0.857322	CAP (Cysteine-rich secretory proteins, Antigen 5, and Pathogenesis-related 1 protein) superfamily protein
Stem	Ciclev10020247m	2.5936	0.122431	4.40491	up	0.852523	D-mannose binding lectin protein with Apple-like carbohydrate-binding domain
Stem	Ciclev10007723m	6.44499	2.83632	1.18416	up	0.851394	leucine-rich repeat transmembrane protein kinase family protein
Stem	Ciclev10031574m	5.3822	2.12214	1.34268	up	0.851135	galacturonosyltransferase-like 3
Stem	Ciclev10029500m	3.64663	0.897828	2.02205	up	0.848602
Stem	Ciclev10015905m	4.58267	1.561	1.55372	up	0.846602	purple acid phosphatase 8
Stem	Ciclev10025326m	4.75817	1.71404	1.47301	up	0.845614	SKU5 similar 17
Stem	Ciclev10015593m	7.34202	3.61172	1.02349	up	0.843097	glucuronokinase G
Stem	Ciclev10011377m	4.56317	1.65282	1.46511	up	0.838172	laccase 7
Stem	Ciclev10022654m	4.1634	1.35695	1.6174	up	0.836431	Protein of unknown function, DUF538
Stem	Ciclev10024045m	4.72892	1.80586	1.38883	up	0.835788	Leucine-rich repeat transmembrane protein kinase
Stem	Ciclev10015289m	5.86972	2.68328	1.12929	up	0.82764
Stem	Ciclev10001212m	4.76792	1.92829	1.30604	up	0.827232	Eukaryotic aspartyl protease family protein
Stem	Ciclev10001854m	3.25662	0.795802	2.03289	up	0.82713	Phosphate-responsive 1 family protein
Stem	Ciclev10025863m	4.80693	1.99971	1.26532	up	0.824268	GDSL-like Lipase/Acylhydrolase superfamily protein
Stem	Ciclev10000098m	2.23283	0.0918234	4.60387	up	0.823844	cellulose synthase-like D3
Stem	Ciclev10005954m	4.57292	1.82626	1.32422	up	0.821868
Stem	Ciclev10005134m	4.03665	1.42836	1.49879	up	0.818441	DNAse I-like superfamily protein
Stem	Ciclev10013012m	3.09086	0.765195	2.01411	up	0.815995	calmodulin like 23
Stem	Ciclev10013559m	5.5382	2.63227	1.07311	up	0.809956	gamma interferon responsive lysosomal thiol (GILT) reductase family protein
Stem	Ciclev10016149m	5.3627	2.47923	1.11307	up	0.809243	annexin 1
Stem	Ciclev10004929m	5.05069	2.26498	1.15698	up	0.808945	6-phosphogluconate dehydrogenase family protein
Stem	Ciclev10003362m	4.43641	1.86708	1.24861	up	0.80707	Mannose-binding lectin superfamily protein
Stem	Ciclev10014199m	5.28469	2.49964	1.0801	up	0.803047	lipoxygenase 2
Stem	Ciclev10031344m	3.85139	1.43857	1.42075	up	0.801071	glycerol-3-phosphate acyltransferase 5
Stem	Ciclev10033695m	4.51442	49.1255	-3.44386	down	0.997812	GDSL-like Lipase/Acylhydrolase superfamily protein
Stem	Ciclev10024056m	2.17433	22.9967	-3.40278	down	0.996346	pleckstrin homology (PH) domain-containing protein
Stem	Ciclev10010157m	7.07876	52.7984	-2.89893	down	0.994009	Protein phosphatase 2C family protein
Stem	Ciclev10028067m	209.935	1215.45	-2.53347	down	0.988088	nitrite reductase 1
Stem	Ciclev10003540m	5.28469	28.8631	-2.44934	down	0.986065	receptor like protein 12
Stem	Ciclev10033765m	2.77885	17.0281	-2.61536	down	0.98579	nodulin MtN21 /EamA-like transporter family protein
Stem	Ciclev10028908m	4.56317	25.2004	-2.46534	down	0.985743	myb domain protein 4
Stem	Ciclev10000220m	365.112	1792.43	-2.29551	down	0.984018	nitrate reductase 1
Stem	Ciclev10012227m	28.7831	140.163	-2.28382	down	0.9839	Heavy metal transport/detoxification superfamily protein
Stem	Ciclev10017305m	7.03976	35.4234	-2.33111	down	0.983414
Stem	Ciclev10029663m	0.994537	8.50897	-3.09689	down	0.977431	Homeodomain-like superfamily protein
Stem	Ciclev10024213m	8.46331	35.9437	-2.08645	down	0.975948	WD-40 repeat family protein / beige-related
Stem	Ciclev10025910m	11.0374	43.8814	-1.99121	down	0.972859	mitogen-activated protein kinase kinase kinase 19
Stem	Ciclev10015627m	56.5911	198.543	-1.8108	down	0.968459	root FNR 1
Stem	Ciclev10011096m	15.1716	52.7066	-1.79661	down	0.964672	cation/H+ exchanger 20
Stem	Ciclev10025542m	32.9075	108.239	-1.71774	down	0.960649	sulfate transmembrane transporters
Stem	Ciclev10014530m	32.2932	102.25	-1.66281	down	0.960202	glucan synthase-like 10
Stem	Ciclev10015079m	63.3871	196.42	-1.63168	down	0.960013	RNI-like superfamily protein
Stem	Ciclev10025829m	25.3119	78.6416	-1.63548	down	0.959778
Stem	Ciclev10026862m	8.74607	29.4549	-1.7518	down	0.959747	RAD-like 6
Stem	Ciclev10033239m	10.2574	32.6279	-1.66944	down	0.958916
Stem	Ciclev10018532m	9.65285	30.516	-1.66054	down	0.958594	ATP binding cassette subfamily B4
Stem	Ciclev10017843m	15.8053	47.5135	-1.58793	down	0.957904	THO2
Stem	Ciclev10020262m	8.78507	26.3635	-1.58542	down	0.956053	U5 small nuclear ribonucleoprotein helicase
Stem	Ciclev10017248m	37.8216	108.719	-1.52332	down	0.95592
Stem	Ciclev10005315m	21.7043	62.2256	-1.51953	down	0.955669	nodulin MtN21 /EamA-like transporter family protein
Stem	Ciclev10012577m	1.54056	7.71316	-2.32387	down	0.955544	Protein of unknown function (DUF1162)
Stem	Ciclev10030755m	143.048	403.829	-1.49725	down	0.955104	K+ uptake permease 6
Stem	Ciclev10015796m	5.07994	16.8751	-1.73201	down	0.955057	Protein kinase superfamily protein
Stem	Ciclev10025208m	60.7837	169.771	-1.48183	down	0.954877	cytochrome BC1 synthesis
Stem	Ciclev10014972m	28.2468	79.8149	-1.49857	down	0.954783	allantoinase
Stem	Ciclev10007228m	3.20787	11.3861	-1.82759	down	0.953654	helicases;ATP-dependent helicases;nucleic acid binding;ATP binding;DNA-directed DNA polymerases;DNA binding
Stem	Ciclev10033238m	45.5537	121.493	-1.41523	down	0.953128	Heavy metal transport/detoxification superfamily protein
Stem	Ciclev10029240m	102.749	270.318	-1.39553	down	0.95265	hemoglobin 1
Stem	Ciclev10010345m	16.6829	44.3813	-1.41158	down	0.951834
Stem	Ciclev10001564m	9.29209	25.4759	-1.45506	down	0.951199	Protein of unknown function (DUF607)
Stem	Ciclev10004121m	13.7285	36.311	-1.40323	down	0.951191	Histidine kinase-, DNA gyrase B-, and HSP90-like ATPase family protein
Stem	Ciclev10031826m	60.6375	157.446	-1.37658	down	0.950729	urophorphyrin methylase 1
Stem	Ciclev10031237m	15.7273	41.2083	-1.38966	down	0.950634	cytochrome P450, family 78, subfamily A, polypeptide 5
Stem	Ciclev10001048m	1.18954	6.62148	-2.47675	down	0.950423	SPla/RYanodine receptor (SPRY) domain-containing protein
Stem	Ciclev10033689m	6.42549	18.4871	-1.52464	down	0.950085	cation/H+ exchanger 4
Stem	Ciclev10026181m	119.296	307.506	-1.36607	down	0.949952	Pathogenesis-related thaumatin superfamily protein
Stem	Ciclev10008097m	568.153	1452.16	-1.35384	down	0.94927	gamma vacuolar processing enzyme
Stem	Ciclev10008213m	3.80264	12.6512	-1.7342	down	0.949144	monogalactosyldiacylglycerol synthase 2
Stem	Ciclev10005987m	0.312011	4.94826	-3.98725	down	0.948329	response regulator 9
Stem	Ciclev10014418m	37.0709	90.2318	-1.28335	down	0.947223	STRUBBELIG-receptor family 8
Stem	Ciclev10018026m	24.0249	58.8588	-1.29273	down	0.94709	embryo defective 3012
Stem	Ciclev10007236m	21.5093	52.2781	-1.28125	down	0.946619
Stem	Ciclev10019581m	49.6391	117.932	-1.2484	down	0.946361	oxidoreductase, 2OG-Fe(II) oxygenase family protein
Stem	Ciclev10031726m	70.2123	166.119	-1.24242	down	0.94629	cofactor of nitrate reductase and xanthine dehydrogenase 2
Stem	Ciclev10005624m	11.2909	28.2918	-1.32522	down	0.946039	phosphoenolpyruvate carboxylase kinase 2
Stem	Ciclev10027657m	51.7744	121.105	-1.22595	down	0.946015	target of rapamycin
Stem	Ciclev10028590m	11.6029	27.9449	-1.2681	down	0.943977	Protein phosphatase 2C family protein
Stem	Ciclev10000338m	8.27805	20.8439	-1.33226	down	0.943459	NB-ARC domain-containing disease resistance protein
Stem	Ciclev10017517m	4.1634	12.4166	-1.57643	down	0.94342	ARM repeat superfamily protein
Stem	Ciclev10024265m	7.56628	19.3543	-1.355	down	0.943239	RNA helicase family protein
Stem	Ciclev10009284m	11.2032	26.0982	-1.22005	down	0.941844	Class I glutamine amidotransferase-like superfamily protein
Stem	Ciclev10024523m	10.0916	23.3333	-1.20923	down	0.940503	ARM repeat superfamily protein
Stem	Ciclev10018900m	8.98008	20.9969	-1.22538	down	0.940118	sacI homology domain-containing protein / WW domain-containing protein
Stem	Ciclev10011943m	3.85139	11.4677	-1.57413	down	0.939648	HEAT repeat-containing protein
Stem	Ciclev10022019m	13.4847	30.7506	-1.18929	down	0.93866
Stem	Ciclev10017257m	4.84593	12.9879	-1.42232	down	0.938275
Stem	Ciclev10012726m	1.2968	6.12156	-2.23895	down	0.936001
Stem	Ciclev10013321m	0.838531	5.25434	-2.64757	down	0.933915	Protein of unknown function (DUF1162)
Stem	Ciclev10019203m	53.588	118.748	-1.14792	down	0.932511	cationic amino acid transporter 2
Stem	Ciclev10023018m	24.7562	55.2062	-1.15704	down	0.932002	Thioredoxin superfamily protein
Stem	Ciclev10025430m	23.2936	52.1659	-1.16317	down	0.931939	Major facilitator superfamily protein
Stem	Ciclev10007599m	17.8627	40.1166	-1.16725	down	0.931461	Octicosapeptide/Phox/Bem1p (PB1) domain-containing protein / tetratricopeptide repeat (TPR)-containing protein
Stem	Ciclev10028828m	19.3935	43.1468	-1.15368	down	0.931382
Stem	Ciclev10011043m	12.5	27.6694	-1.14637	down	0.928896	NB-ARC domain-containing disease resistance protein
Stem	Ciclev10018467m	56.9908	123.441	-1.11502	down	0.927971	CW-type Zinc Finger
Stem	Ciclev10004114m	128.1	276.531	-1.11017	down	0.927681	calcium-dependent lipid-binding family protein
Stem	Ciclev10028116m	28.6173	62.2766	-1.1218	down	0.927477	Protein of unknown function (DUF3049)
Stem	Ciclev10021877m	66.0294	141.765	-1.10232	down	0.927344	homeobox 7
Stem	Ciclev10033462m	60.2572	128.757	-1.09544	down	0.927297	RING/FYVE/PHD zinc finger superfamily protein
Stem	Ciclev10007219m	319.578	678.677	-1.08656	down	0.92721	ubiquitin-protein ligase 1
Stem	Ciclev10026139m	242.667	513.65	-1.08181	down	0.927038	Pathogenesis-related thaumatin superfamily protein
Stem	Ciclev10030469m	46.4605	98.7611	-1.08794	down	0.926889	Zinc finger, C3HC4 type (RING finger) family protein
Stem	Ciclev10014006m	37.1879	79.3762	-1.09387	down	0.926795
Stem	Ciclev10006796m	5.33345	12.6308	-1.24381	down	0.926724	LRR and NB-ARC domains-containing disease resistance protein
Stem	Ciclev10019936m	39.0112	82.5084	-1.08065	down	0.926653	P-loop containing nucleoside triphosphate hydrolases superfamily protein
Stem	Ciclev10000001m	357.848	740.117	-1.04841	down	0.925987	ubiquitin-protein ligase 2
Stem	Ciclev10027765m	164.06	340.308	-1.05262	down	0.925963	Plant regulator RWP-RK family protein
Stem	Ciclev10020762m	29.8068	62.5725	-1.06989	down	0.925854	BTB and TAZ domain protein 1
Stem	Ciclev10018645m	46.2264	95.6697	-1.04934	down	0.92565	ATPase E1-E2 type family protein / haloacid dehalogenase-like hydrolase family protein
Stem	Ciclev10011020m	23.3424	48.5848	-1.05755	down	0.925069	Cleavage and polyadenylation specificity factor (CPSF) A subunit protein
Stem	Ciclev10032266m	13.1142	27.6286	-1.07503	down	0.922874	P-loop containing nucleoside triphosphate hydrolases superfamily protein
Stem	Ciclev10007368m	12.5487	26.69	-1.08876	down	0.922858	H(+)-ATPase 2
Stem	Ciclev10024655m	13.5822	28.4856	-1.06851	down	0.922662	polyribonucleotide nucleotidyltransferase, putative
Stem	Ciclev10010703m	12.5682	26.4451	-1.07322	down	0.922152	SWIM zinc finger family protein
Stem	Ciclev10032699m	13.3385	27.7715	-1.05801	down	0.922089	GRAM domain-containing protein / ABA-responsive protein-related
Stem	Ciclev10018971m	14.4793	29.6998	-1.03646	down	0.921909	oligopeptide transporter 7
Stem	Ciclev10019859m	296.245	606.289	-1.03321	down	0.921431	6-phosphogluconate dehydrogenase family protein
Stem	Ciclev10018424m	203.49	415.603	-1.03025	down	0.921431	pleckstrin homology (PH) domain-containing protein
Stem	Ciclev10008176m	160.296	328.218	-1.03391	down	0.921407	O-Glycosyl hydrolases family 17 protein
Stem	Ciclev10024676m	161.398	330.207	-1.03275	down	0.921407	ATPases;nucleotide binding;ATP binding;nucleoside-triphosphatases;transcription factor binding
Stem	Ciclev10023260m	7.25427	16.3344	-1.17101	down	0.921266	LRR and NB-ARC domains-containing disease resistance protein
Stem	Ciclev10000711m	8.97033	19.7216	-1.13655	down	0.92125	DCD (Development and Cell Death) domain protein
Stem	Ciclev10022498m	53.5685	109.198	-1.0275	down	0.921141	Heavy metal transport/detoxification superfamily protein
Stem	Ciclev10030580m	251.725	510.773	-1.02083	down	0.921023	phosphoenolpyruvate carboxylase 4
Stem	Ciclev10020548m	48.4203	98.0776	-1.01831	down	0.920686	SBP (S-ribonuclease binding protein) family protein
Stem	Ciclev10011771m	48.9955	98.6999	-1.0104	down	0.920239	serine/threonine protein kinase 1
Stem	Ciclev10031247m	44.0814	89.0483	-1.01442	down	0.920215	cytochrome P450, family 71, subfamily B, polypeptide 34
Stem	Ciclev10008628m	17.1996	34.7807	-1.01591	down	0.918325	NAC domain containing protein 2
Stem	Ciclev10003722m	3.36387	8.90687	-1.40479	down	0.916851	Frigida-like protein
Stem	Ciclev10005589m	35.9691	71.9997	-1.00123	down	0.915792	sequence-specific DNA binding transcription factors
Stem	Ciclev10019076m	12.1684	24.7515	-1.02437	down	0.915471	Leucine-rich repeat protein kinase family protein
Stem	Ciclev10005668m	8.49256	17.5179	-1.04455	down	0.913816	cyclic nucleotide gated channel 3
Stem	Ciclev10018785m	7.95629	16.416	-1.04493	down	0.912059	Malectin/receptor-like protein kinase family protein
Stem	Ciclev10000162m	1.2578	5.30535	-2.07655	down	0.909848	receptor like protein 6
Stem	Ciclev10015091m	7.28352	14.957	-1.03811	down	0.908429	Tetratricopeptide repeat (TPR)-like superfamily protein
Stem	Ciclev10003293m	7.27377	14.9264	-1.03709	down	0.908319	Disease resistance protein (TIR-NBS-LRR class) family
Stem	Ciclev10001637m	4.03665	9.39659	-1.21898	down	0.90759	Pseudouridine synthase family protein
Stem	Ciclev10020087m	3.24687	8.34572	-1.36199	down	0.907378	TRICHOME BIREFRINGENCE-LIKE 6
Stem	Ciclev10020085m	5.86972	12.8349	-1.12871	down	0.907182	tryptophan aminotransferase related 2
Stem	Ciclev10012680m	4.0659	9.31497	-1.19598	down	0.905535
Stem	Ciclev10023021m	6.20123	13.1001	-1.07896	down	0.904719	glutamine dumper 4
Stem	Ciclev10012014m	2.7106	7.37648	-1.44432	down	0.903504	myb-like HTH transcriptional regulator family protein
Stem	Ciclev10025225m	5.13844	11.2025	-1.12441	down	0.898359	gamma-glutamyl transpeptidase 1
Stem	Ciclev10018531m	3.37362	8.11106	-1.26559	down	0.897991	LRR and NB-ARC domains-containing disease resistance protein
Stem	Ciclev10004188m	4.21215	9.57004	-1.18397	down	0.895521	NB-ARC domain-containing disease resistance protein
Stem	Ciclev10018850m	5.48945	11.1718	-1.02513	down	0.887271	Pentatricopeptide repeat (PPR) superfamily protein
Stem	Ciclev10006288m	3.97815	8.83545	-1.15121	down	0.885797
Stem	Ciclev10002835m	3.30537	7.59073	-1.19943	down	0.885067
Stem	Ciclev10023613m	4.75817	9.88632	-1.05502	down	0.884495	LRR and NB-ARC domains-containing disease resistance protein
Stem	Ciclev10030448m	5.29444	10.7535	-1.02226	down	0.88415	cytochrome P450, family 76, subfamily C, polypeptide 4
Stem	Ciclev10027585m	5.17744	10.5801	-1.03104	down	0.883844	methyltransferase 1
Stem	Ciclev10009836m	4.29991	9.28436	-1.1105	down	0.883334	Thioredoxin superfamily protein
Stem	Ciclev10023453m	4.72892	9.75368	-1.04444	down	0.882111	Chaperone DnaJ-domain superfamily protein
Stem	Ciclev10033634m	0.955535	4.21367	-2.1407	down	0.879774	Uncharacterised protein family (UPF0497)
Stem	Ciclev10024511m	4.55342	9.4476	-1.053	down	0.879601	disease resistance protein (TIR-NBS-LRR class), putative
Stem	Ciclev10030753m	1.90132	5.61143	-1.56137	down	0.878496	glucan synthase-like 11
Stem	Ciclev10014317m	3.02261	7.02959	-1.21765	down	0.877468	lectin protein kinase family protein
Stem	Ciclev10029861m	3.22737	7.37648	-1.19257	down	0.877296
Stem	Ciclev10018688m	4.23166	8.88646	-1.07039	down	0.875578	NB-ARC domain-containing disease resistance protein
Stem	Ciclev10000275m	3.90014	8.43755	-1.1133	down	0.874002	NB-ARC domain-containing disease resistance protein
Stem	Ciclev10012905m	1.11154	4.35651	-1.97061	down	0.873171	PEBP (phosphatidylethanolamine-binding protein) family protein
Stem	Ciclev10030216m	2.95436	6.82554	-1.2081	down	0.872434	Disease resistance protein (CC-NBS-LRR class) family
Stem	Ciclev10026853m	3.78314	8.20289	-1.11655	down	0.871344
Stem	Ciclev10029792m	2.85685	6.62148	-1.21273	down	0.868599	Calmodulin-binding transcription activator protein with CG-1 and Ankyrin domains
Stem	Ciclev10003726m	0.204758	2.84652	-3.79721	down	0.864866	RAD-like 6
Stem	Ciclev10032862m	1.21879	4.24428	-1.80006	down	0.855416	LOB domain-containing protein 21
Stem	Ciclev10027179m	3.42238	7.28465	-1.08986	down	0.853715	NB-ARC domain-containing disease resistance protein
Stem	Ciclev10029211m	1.09204	3.98922	-1.86908	down	0.852946
Stem	Ciclev10003121m	2.15483	5.38697	-1.3219	down	0.849213	NB-ARC domain-containing disease resistance protein
Stem	Ciclev10023418m	2.45709	5.64204	-1.19926	down	0.843434	disease resistance protein (TIR-NBS-LRR class), putative
Stem	Ciclev10025956m	2.25233	5.37677	-1.25532	down	0.84203	Galactose oxidase/kelch repeat superfamily protein
Stem	Ciclev10026979m	3.26637	6.75412	-1.04808	down	0.838642
Stem	Ciclev10018388m	3.54913	7.14182	-1.00883	down	0.837411
Stem	Ciclev10013786m	0.438766	2.77511	-2.66102	down	0.832471	Protein of unknown function (DUF1162)
Stem	Ciclev10027414m	1.91107	4.7034	-1.29932	down	0.823923	chitin elicitor receptor kinase 1
Stem	Ciclev10018509m	1.99882	4.74421	-1.24702	down	0.819814	LRR and NB-ARC domains-containing disease resistance protein
Stem	Ciclev10030137m	1.93057	4.57076	-1.24341	down	0.811987	NC domain-containing protein-related
Stem	Ciclev10016890m	2.73985	5.68285	-1.05252	down	0.810968	F-box family protein
Stem	Ciclev10034002m	1.86232	4.44833	-1.25616	down	0.808803
Stem	Ciclev10004266m	1.62831	4.12185	-1.33992	down	0.803424	Leucine-rich repeat protein kinase family protein
Stem	Ciclev10023851m	2.17433	4.87684	-1.16538	down	0.803016	6-phosphogluconate dehydrogenase family protein
Leaf	Ciclev10006006m	19338.8	95.5663	7.66078	up	0.999355	Chlorophyll A-B binding family protein
Leaf	Ciclev10024449m	986.169	0.220821	12.1247	up	0.998876	expansin-like B1
Leaf	Ciclev10032043m	1264.96	6.37927	7.63148	up	0.998618	galactinol synthase 4
Leaf	Ciclev10004574m	2865.24	22.9776	6.96228	up	0.998588	CAP160 protein
Leaf	Ciclev10006713m	680.446	3.60674	7.55964	up	0.997191	MLP-like protein 423
Leaf	Ciclev10005815m	1285.38	16.9173	6.24754	up	0.997123	late embryogenesis abundant domain-containing protein / LEA domain-containing protein
Leaf	Ciclev10028441m	2468.27	40.6678	5.92347	up	0.996956	Protein of unknown function (DUF1624)
Leaf	Ciclev10023297m	422.394	0.0981426	12.0714	up	0.996015	homolog of carrot EP3-3 chitinase
Leaf	Ciclev10005144m	928.303	16.2671	5.83456	up	0.995696	nuclear factor Y, subunit A1
Leaf	Ciclev10013013m	868.212	18.0582	5.58732	up	0.995043
Leaf	Ciclev10021486m	496.454	5.61866	6.46529	up	0.995005
Leaf	Ciclev10010508m	1895.39	50.5312	5.22918	up	0.994671	Late embryogenesis abundant protein
Leaf	Ciclev10013710m	371.851	2.07326	7.48668	up	0.994481	Low temperature and salt responsive protein family
Leaf	Ciclev10019566m	538.351	10.6239	5.66316	up	0.993722	chloroplast beta-amylase
Leaf	Ciclev10008725m	597.051	13.5805	5.45825	up	0.993449	GDSL-like Lipase/Acylhydrolase superfamily protein
Leaf	Ciclev10024410m	294.334	0.184017	10.6434	up	0.99335	expansin-like B1
Leaf	Ciclev10008812m	1676.49	58.7997	4.83349	up	0.992302	NAC (No Apical Meristem) domain transcriptional regulator superfamily protein
Leaf	Ciclev10013249m	341.58	5.25063	6.02359	up	0.991961
Leaf	Ciclev10029293m	1209.94	42.4221	4.83397	up	0.991946	cold-regulated 413-plasma membrane 2
Leaf	Ciclev10021884m	1058.97	40.3121	4.71531	up	0.991103	expansin-like B1
Leaf	Ciclev10017191m	402.598	10.1823	5.3052	up	0.991027
Leaf	Ciclev10024637m	9653.32	447.751	4.43026	up	0.989812
Leaf	Ciclev10019177m	825.905	34.0432	4.60054	up	0.989638	pseudo-response regulator 5
Leaf	Ciclev10002661m	404.663	12.7585	4.98719	up	0.989494	HSP20-like chaperones superfamily protein
Leaf	Ciclev10022120m	801.064	38.7909	4.36813	up	0.987649	TSPO(outer membrane tryptophan-rich sensory protein)-related
Leaf	Ciclev10012535m	439.926	20.1683	4.4471	up	0.986214	NAD(P)-binding Rossmann-fold superfamily protein
Leaf	Ciclev10028495m	795.039	44.1642	4.17008	up	0.985485	highly ABA-induced PP2C gene 2
Leaf	Ciclev10028995m	1173.66	70.356	4.06019	up	0.985356	tetraspanin3
Leaf	Ciclev10017162m	1058.59	63.9522	4.049	up	0.985144	Dormancy/auxin associated family protein
Leaf	Ciclev10005133m	169.956	2.4781	6.09978	up	0.984483	Chalcone and stilbene synthase family protein
Leaf	Ciclev10008610m	264.104	9.88787	4.7393	up	0.984461	Protein phosphatase 2C family protein
Leaf	Ciclev10020962m	167.957	2.93201	5.84005	up	0.983785	EID1-like 3
Leaf	Ciclev10002439m	242.944	9.21314	4.72079	up	0.983504
Leaf	Ciclev10008669m	136.653	0.0981426	10.4434	up	0.983246	Glycosyl hydrolase family protein with chitinase insertion domain
Leaf	Ciclev10022050m	149.564	1.80337	6.37392	up	0.983041	homolog of carrot EP3-3 chitinase
Leaf	Ciclev10026748m	161.865	3.32458	5.60548	up	0.982753
Leaf	Ciclev10019426m	156.82	2.83387	5.7902	up	0.982684	Major facilitator superfamily protein
Leaf	Ciclev10012978m	151.603	2.29408	6.04624	up	0.982639	Late Embryogenesis Abundant 4-5
Leaf	Ciclev10006308m	1493.84	110.128	3.76177	up	0.981295	drought-induced 21
Leaf	Ciclev10017067m	416.78	26.4985	3.9753	up	0.981052	glycine-rich protein
Leaf	Ciclev10020545m	408.464	26.3145	3.95628	up	0.980627	B-box type zinc finger protein with CCT domain
Leaf	Ciclev10019637m	640.391	47.3047	3.7589	up	0.979534	Cytochrome P450 superfamily protein
Leaf	Ciclev10012859m	124.259	1.34946	6.52483	up	0.979473	WCRKC thioredoxin 1
Leaf	Ciclev10019319m	378.71	24.8178	3.93165	up	0.979466	Major facilitator superfamily protein
Leaf	Ciclev10008555m	310.992	19.604	3.98766	up	0.979056	Glycosyl hydrolase superfamily protein
Leaf	Ciclev10013297m	10875.5	912.272	3.57547	up	0.978737
Leaf	Ciclev10017113m	570.607	43.3668	3.71784	up	0.978532	CCR-like
Leaf	Ciclev10015533m	205.536	11.0288	4.22005	up	0.977553	Aldolase-type TIM barrel family protein
Leaf	Ciclev10006723m	133.237	3.71715	5.16365	up	0.977249	Caleosin-related family protein
Leaf	Ciclev10029307m	159.244	6.64916	4.58192	up	0.977074	maternal effect embryo arrest 59
Leaf	Ciclev10032304m	256.569	17.5307	3.87139	up	0.975427	NAC-like, activated by AP3/PI
Leaf	Ciclev10002766m	212.25	13.2124	4.00579	up	0.975389
Leaf	Ciclev10028459m	323.055	24.4866	3.72172	up	0.975298	XB3 ortholog 1 in Arabidopsis thaliana
Leaf	Ciclev10031245m	165.401	8.36666	4.30517	up	0.975283	cytochrome P450, family 78, subfamily A, polypeptide 10
Leaf	Ciclev10008768m	148.465	6.78411	4.45182	up	0.974554	heat shock transcription factor C1
Leaf	Ciclev10033283m	292.163	22.2661	3.71385	up	0.974311	Low temperature and salt responsive protein family
Leaf	Ciclev10014842m	430.207	36.644	3.55338	up	0.974281	SKU5 similar 4
Leaf	Ciclev10008097m	1905.26	185.33	3.36182	up	0.974152	gamma vacuolar processing enzyme
Leaf	Ciclev10029285m	89.2087	0.184017	8.9212	up	0.972907	dehydrin LEA
Leaf	Ciclev10031498m	1032.51	103.025	3.32509	up	0.97217	DNAJ heat shock N-terminal domain-containing protein
Leaf	Ciclev10015173m	115.52	4.31827	4.74154	up	0.971624	B-box type zinc finger protein with CCT domain
Leaf	Ciclev10016071m	100.544	2.77253	5.18047	up	0.970971	Duplicated homeodomain-like superfamily protein
Leaf	Ciclev10011554m	382.894	36.5581	3.38868	up	0.970341	Homeodomain-like superfamily protein
Leaf	Ciclev10009021m	343.487	33.6997	3.34945	up	0.968367	NAD(P)-binding Rossmann-fold superfamily protein
Leaf	Ciclev10032029m	95.856	3.69262	4.69815	up	0.967001	Integrase-type DNA-binding superfamily protein
Leaf	Ciclev10022024m	98.8618	4.04838	4.61	up	0.96697	heat shock protein 21
Leaf	Ciclev10005406m	270.129	26.0446	3.37459	up	0.966948	galactinol synthase 2
Leaf	Ciclev10028637m	239.104	22.1557	3.43189	up	0.966636	Glycosyl hydrolase superfamily protein
Leaf	Ciclev10006194m	591.502	65.9886	3.16409	up	0.966264	Ribosomal protein S24e family protein
Leaf	Ciclev10020533m	148.041	11.041	3.74505	up	0.965877
Leaf	Ciclev10002859m	199.723	17.8988	3.48007	up	0.965718	thioredoxin H-type 1
Leaf	Ciclev10011574m	146.121	11.1392	3.71345	up	0.965171	Protein kinase protein with tetratricopeptide repeat domain
Leaf	Ciclev10005974m	5999.69	744.007	3.0115	up	0.964139	Chlorophyll A-B binding family protein
Leaf	Ciclev10021541m	287.793	30.2647	3.24932	up	0.963592	Protein of unknown function (DUF581)
Leaf	Ciclev10011407m	95.4455	4.77218	4.32196	up	0.963387	Exostosin family protein
Leaf	Ciclev10026702m	160.846	14.5251	3.46906	up	0.962355	arabinogalactan protein 3
Leaf	Ciclev10024878m	118.433	8.53841	3.79396	up	0.961952
Leaf	Ciclev10029277m	68.2207	0.797409	6.41875	up	0.961672	maternal effect embryo arrest 14
Leaf	Ciclev10001308m	149.921	13.1879	3.50692	up	0.961626	galactinol synthase 2
Leaf	Ciclev10031658m	235.025	25.1	3.22706	up	0.961345	Auxin efflux carrier family protein
Leaf	Ciclev10006265m	64.4204	0.269892	7.89899	up	0.960776
Leaf	Ciclev10014753m	220.565	24.5847	3.16537	up	0.958969	Magnesium transporter CorA-like family protein
Leaf	Ciclev10014570m	107.522	8.02316	3.74432	up	0.95887	flavin-binding, kelch repeat, f box 1
Leaf	Ciclev10022536m	611.709	79.2256	2.94881	up	0.958855	SufE/NifU family protein
Leaf	Ciclev10032613m	253.444	29.9703	3.08006	up	0.95862	Ankyrin repeat family protein
Leaf	Ciclev10008765m	245.115	28.903	3.08417	up	0.958316	thiazole biosynthetic enzyme, chloroplast (ARA6) (THI1) (THI4)
Leaf	Ciclev10012739m	60.3817	0.306696	7.62116	up	0.95777	glutathione S-transferase phi 12
Leaf	Ciclev10017145m	525.546	68.5403	2.93879	up	0.957458	Glycine-rich protein family
Leaf	Ciclev10014484m	147.882	14.6846	3.33207	up	0.957216
Leaf	Ciclev10000947m	378.869	48.5315	2.9647	up	0.956859	MATE efflux family protein
Leaf	Ciclev10012232m	193.658	22.1557	3.12777	up	0.95676	nuclear factor Y, subunit A10
Leaf	Ciclev10013568m	58.8457	0.220821	8.05792	up	0.956714	Major facilitator superfamily protein
Leaf	Ciclev10003896m	70.4586	2.67439	4.7195	up	0.956487	Integrase-type DNA-binding superfamily protein
Leaf	Ciclev10014457m	64.0496	1.53348	5.38431	up	0.956213	Zinc finger (C3HC4-type RING finger) family protein
Leaf	Ciclev10009370m	153.417	16.488	3.21798	up	0.954999	Integrase-type DNA-binding superfamily protein
Leaf	Ciclev10001138m	71.0147	3.23871	4.45463	up	0.954483	Integrase-type DNA-binding superfamily protein
Leaf	Ciclev10002843m	813.18	117.722	2.78819	up	0.954164	Dormancy/auxin associated family protein
Leaf	Ciclev10031299m	123.266	12.0838	3.35063	up	0.953966	beta glucosidase 40
Leaf	Ciclev10027988m	819.96	118.973	2.78491	up	0.953845	thiaminC
Leaf	Ciclev10001944m	62.699	1.93832	5.01557	up	0.953496	Nodulin MtN3 family protein
Leaf	Ciclev10029147m	55.3764	0.257624	7.74786	up	0.953412	cold regulated gene 27
Leaf	Ciclev10011000m	1422.68	213.755	2.73458	up	0.953245	H(+)-ATPase 4
Leaf	Ciclev10028122m	112.858	10.8693	3.37618	up	0.952881	ferulic acid 5-hydroxylase 1
Leaf	Ciclev10020141m	178.722	21.8122	3.03451	up	0.952076	Fatty acid/sphingolipid desaturase
Leaf	Ciclev10013197m	343.302	47.3293	2.85867	up	0.952069	PHYTOSULFOKINE 3 PRECURSOR
Leaf	Ciclev10008047m	133.131	14.4883	3.19989	up	0.951044	cytochrome P450, family 71, subfamily B, polypeptide 34
Leaf	Ciclev10002949m	78.7743	5.56959	3.82208	up	0.950588
Leaf	Ciclev10004044m	1059.81	168.83	2.65016	up	0.950194	gigantea protein (GI)
Leaf	Ciclev10014264m	55.2307	1.05503	5.71011	up	0.950163	DCD (Development and Cell Death) domain protein
Leaf	Ciclev10004525m	535.08	83.3967	2.68169	up	0.948956	cryptochrome 2
Leaf	Ciclev10011949m	1556.27	253.036	2.62068	up	0.94885	fatty acid desaturase 2
Leaf	Ciclev10001546m	242.705	33.6138	2.85208	up	0.948561	purine permease 1
Leaf	Ciclev10032920m	262.608	37.2083	2.81921	up	0.948486
Leaf	Ciclev10018822m	53.6682	1.12864	5.57141	up	0.948303	stachyose synthase
Leaf	Ciclev10020868m	103.642	10.5749	3.2929	up	0.948098	similar to RCD one 5
Leaf	Ciclev10012590m	50.477	0.588856	6.42157	up	0.946952	Pathogenesis-related thaumatin superfamily protein
Leaf	Ciclev10016102m	58.3955	2.52717	4.53026	up	0.946352
Leaf	Ciclev10030504m	373.268	59.4621	2.65017	up	0.946193	multidrug resistance-associated protein 3
Leaf	Ciclev10019000m	155.814	20.1806	2.94879	up	0.946026	cellulose synthase like G3
Leaf	Ciclev10026728m	51.4569	1.17771	5.44931	up	0.945525	Late embryogenesis abundant protein (LEA) family protein
Leaf	Ciclev10000918m	67.0025	4.60043	3.86437	up	0.944827	cytochrome P450, family 81, subfamily D, polypeptide 8
Leaf	Ciclev10006362m	545.528	89.273	2.61136	up	0.944743	low-molecular-weight cysteine-rich 69
Leaf	Ciclev10021174m	67.7705	4.94393	3.77693	up	0.944022	WRKY DNA-binding protein 23
Leaf	Ciclev10032785m	49.8546	1.12864	5.46507	up	0.943847
Leaf	Ciclev10001547m	129.741	16.4143	2.98261	up	0.943506	RmlC-like cupins superfamily protein
Leaf	Ciclev10021060m	1264.59	215.963	2.54981	up	0.942071	DCD (Development and Cell Death) domain protein
Leaf	Ciclev10000775m	177.054	25.9955	2.76785	up	0.942048	Pyridoxal phosphate (PLP)-dependent transferases superfamily protein
Leaf	Ciclev10010903m	92.0821	10.0842	3.19083	up	0.941608	pleiotropic drug resistance 6
Leaf	Ciclev10007274m	228.02	36.3373	2.64964	up	0.941479	DEA(D/H)-box RNA helicase family protein
Leaf	Ciclev10004771m	171.73	25.2717	2.76455	up	0.941243	Tetratricopeptide repeat (TPR)-like superfamily protein
Leaf	Ciclev10025170m	293.633	48.2003	2.6069	up	0.940492	nucleotide transporter 1
Leaf	Ciclev10005200m	198.227	30.8536	2.68364	up	0.940355	Protein phosphatase 2C family protein
Leaf	Ciclev10011190m	89.2219	10.1578	3.13482	up	0.939771	Peptidase M28 family protein
Leaf	Ciclev10016038m	87.858	9.92467	3.14608	up	0.939551	Protein of unknown function (DUF761)
Leaf	Ciclev10013017m	56.9124	3.5086	4.01978	up	0.939353
Leaf	Ciclev10007736m	70.3659	6.45288	3.44686	up	0.938996	alpha dioxygenase
Leaf	Ciclev10031073m	530.737	91.4076	2.53761	up	0.938776	Tetratricopeptide repeat (TPR)-like superfamily protein
Leaf	Ciclev10019524m	118.83	16.0463	2.88859	up	0.93804	digalactosyl diacylglycerol deficient 2
Leaf	Ciclev10022616m	188.071	30.1052	2.64319	up	0.937827
Leaf	Ciclev10007809m	441.303	76.1096	2.53562	up	0.937729	sodium/calcium exchanger family protein / calcium-binding EF hand family protein
Leaf	Ciclev10000654m	155.112	23.8977	2.69837	up	0.937501	WRKY DNA-binding protein 33
Leaf	Ciclev10029088m	99.0472	12.4886	2.9875	up	0.937266	expansin-like A1
Leaf	Ciclev10011876m	142.599	21.2601	2.74574	up	0.937129	prenylcysteine methylesterase
Leaf	Ciclev10028824m	145.922	22.2416	2.71387	up	0.936537	Heavy metal transport/detoxification superfamily protein
Leaf	Ciclev10018645m	75.5301	8.0845	3.22382	up	0.93574	ATPase E1-E2 type family protein / haloacid dehalogenase-like hydrolase family protein
Leaf	Ciclev10020718m	490.469	86.7212	2.4997	up	0.93552	heat shock transcription factor A6B
Leaf	Ciclev10028590m	80.9459	9.36035	3.11232	up	0.935322	Protein phosphatase 2C family protein
Leaf	Ciclev10025286m	457.286	81.6424	2.48571	up	0.934776	Major facilitator superfamily protein
Leaf	Ciclev10032680m	190.679	31.5406	2.59587	up	0.934328	Glutathione S-transferase family protein
Leaf	Ciclev10015364m	72.127	7.70419	3.22682	up	0.934024	CONSTANS-like 9
Leaf	Ciclev10009779m	172.644	28.3632	2.60571	up	0.933872	blue-copper-binding protein
Leaf	Ciclev10007054m	42.3202	1.00596	5.3947	up	0.933781	Leucine-rich repeat transmembrane protein kinase
Leaf	Ciclev10030691m	98.1468	12.9548	2.92145	up	0.9335	trehalose-phosphatase/synthase 9
Leaf	Ciclev10000134m	372.195	66.4793	2.48508	up	0.933462	autoinhibited Ca2+-ATPase 1
Leaf	Ciclev10001415m	400.042	72.3311	2.46746	up	0.933333	Plant stearoyl-acyl-carrier-protein desaturase family protein
Leaf	Ciclev10028092m	73.9808	8.45253	3.1297	up	0.932726	Seven transmembrane MLO family protein
Leaf	Ciclev10005965m	89.5662	11.5808	2.95122	up	0.932567	NAD(P)-binding Rossmann-fold superfamily protein
Leaf	Ciclev10026820m	119.227	18.0828	2.72103	up	0.932384
Leaf	Ciclev10020837m	64.6455	6.41607	3.33279	up	0.932134	UDP-N-acetylglucosamine (UAA) transporter family
Leaf	Ciclev10030878m	663.285	127.254	2.38192	up	0.931678	telomeric DNA binding protein 1
Leaf	Ciclev10019534m	277.597	48.7891	2.50836	up	0.931413	CCT motif -containing response regulator protein
Leaf	Ciclev10016943m	50.7418	3.39819	3.90034	up	0.931367	chlororespiratory reduction 3
Leaf	Ciclev10008560m	71.9416	8.29305	3.11685	up	0.931322	Mitochondrial substrate carrier family protein
Leaf	Ciclev10031206m	150.186	24.5847	2.61092	up	0.931246	Actin cross-linking protein
Leaf	Ciclev10009880m	57.3229	4.98074	3.52468	up	0.930836
Leaf	Ciclev10022651m	107.217	15.8868	2.75463	up	0.930714	vacuolar ATPase subunit F family protein
Leaf	Ciclev10018424m	431.557	82.1944	2.39244	up	0.930228	pleckstrin homology (PH) domain-containing protein
Leaf	Ciclev10002733m	59.8918	5.71681	3.38908	up	0.930213	related to AP2 1
Leaf	Ciclev10012618m	173.862	29.774	2.54582	up	0.929113	VQ motif-containing protein
Leaf	Ciclev10009029m	66.7112	7.64285	3.12575	up	0.928209
Leaf	Ciclev10016045m	83.9518	11.1883	2.90758	up	0.928118	seven in absentia of Arabidopsis 2
Leaf	Ciclev10002349m	2550.85	532.019	2.26143	up	0.927944	Dehydrin family protein
Leaf	Ciclev10030803m	275.889	51.1323	2.43178	up	0.927845	UDP-Glycosyltransferase superfamily protein
Leaf	Ciclev10014586m	342.229	66.418	2.36532	up	0.927837	cellulose synthase-like B4
Leaf	Ciclev10005411m	327.703	63.6209	2.36482	up	0.927116	Homeodomain-like superfamily protein
Leaf	Ciclev10015536m	94.4391	14.0589	2.7479	up	0.926926	Protein of unknown function (DUF3537)
Leaf	Ciclev10018655m	1825.24	386.645	2.239	up	0.926911	Sucrose-phosphate synthase family protein
Leaf	Ciclev10025249m	215.534	39.0853	2.46322	up	0.926061	Leucine-rich repeat family protein
Leaf	Ciclev10007416m	147.75	25.1736	2.55317	up	0.926015	proteinaceous RNase P 3
Leaf	Ciclev10031412m	353.683	70.356	2.32971	up	0.926015	Major facilitator superfamily protein
Leaf	Ciclev10002029m	50.1062	4.06065	3.62521	up	0.925962	G-box binding factor 4
Leaf	Ciclev10003574m	48.2789	3.59447	3.74754	up	0.925886	phloem protein 2-B15
Leaf	Ciclev10009912m	224.988	42.9742	2.38831	up	0.924444
Leaf	Ciclev10015713m	36.9838	1.0305	5.16548	up	0.923829	zinc transporter 1 precursor
Leaf	Ciclev10025102m	37.9769	1.31266	4.85456	up	0.923624	heat shock protein 70B
Leaf	Ciclev10001145m	50.6359	4.45322	3.50724	up	0.923556	glycerol-3-phosphate acyltransferase 3
Leaf	Ciclev10012318m	74.4973	10.0719	2.88685	up	0.923222	Protein of unknown function (DUF179)
Leaf	Ciclev10012601m	128.642	21.9349	2.55207	up	0.923176	RING/U-box superfamily protein
Leaf	Ciclev10026028m	2401.07	540.778	2.15057	up	0.923032	flavonol synthase 1
Leaf	Ciclev10025847m	85.4746	12.8689	2.7316	up	0.922804	GDSL lipase 1
Leaf	Ciclev10026197m	188.507	35.4172	2.4121	up	0.922592	Homeobox-leucine zipper protein family
Leaf	Ciclev10029483m	56.8462	6.14618	3.2093	up	0.922129	Protein of unknown function (DUF1685)
Leaf	Ciclev10002725m	46.094	3.72942	3.62756	up	0.92102	Adenine nucleotide alpha hydrolases-like superfamily protein
Leaf	Ciclev10031699m	300.757	62.6027	2.2643	up	0.920982	HCP-like superfamily protein with MYND-type zinc finger
Leaf	Ciclev10024711m	748.998	170.474	2.13541	up	0.920906	pleiotropic drug resistance 12
Leaf	Ciclev10009261m	311.575	65.4979	2.25006	up	0.9208	Aluminium induced protein with YGL and LRDR motifs
Leaf	Ciclev10011567m	183.674	35.9447	2.3533	up	0.91976	polyamine oxidase 4
Leaf	Ciclev10030771m	164.818	31.516	2.38672	up	0.919699	Terpenoid cyclases family protein
Leaf	Ciclev10026421m	87.1562	13.9976	2.63843	up	0.919608	F-box/RNI-like superfamily protein
Leaf	Ciclev10028480m	355.59	77.4836	2.19825	up	0.919563	eukaryotic release factor 1-3
Leaf	Ciclev10032930m	484.762	110.202	2.13713	up	0.919206	high mobility group B1
Leaf	Ciclev10032987m	132.284	23.8855	2.46943	up	0.918933	RING/U-box superfamily protein
Leaf	Ciclev10024988m	203.497	41.2076	2.30402	up	0.918781
Leaf	Ciclev10005358m	155.549	29.7617	2.38584	up	0.918515
Leaf	Ciclev10009911m	77.9401	11.9857	2.70106	up	0.91847
Leaf	Ciclev10028499m	179.993	35.8466	2.32803	up	0.918325	RING/U-box superfamily protein
Leaf	Ciclev10031064m	183.807	36.9752	2.31356	up	0.917771	AZA-guanine resistant1
Leaf	Ciclev10031113m	219.135	45.7713	2.25931	up	0.917581	CTP synthase family protein
Leaf	Ciclev10020980m	71.1869	10.3786	2.778	up	0.917369	Protein kinase superfamily protein
Leaf	Ciclev10016302m	952.045	226.415	2.07206	up	0.917171	Heavy metal transport/detoxification superfamily protein
Leaf	Ciclev10022527m	895.914	214.049	2.06542	up	0.91702
Leaf	Ciclev10002611m	371.665	85.1387	2.12612	up	0.916997	HSP20-like chaperones superfamily protein
Leaf	Ciclev10009036m	89.3146	14.6846	2.60459	up	0.916951
Leaf	Ciclev10009459m	69.333	9.9124	2.80624	up	0.916921	homolog of CFIM-25
Leaf	Ciclev10029371m	64.4337	8.56294	2.91164	up	0.916853	Adenine nucleotide alpha hydrolases-like superfamily protein
Leaf	Ciclev10015120m	146.651	28.4614	2.36531	up	0.916572	allantoate amidohydrolase
Leaf	Ciclev10005245m	297.552	66.602	2.1595	up	0.916352	strictosidine synthase-like 2
Leaf	Ciclev10004951m	259.641	57.8428	2.16631	up	0.915327	CBL-interacting protein kinase 4
Leaf	Ciclev10025563m	42.3864	3.45953	3.61495	up	0.915289
Leaf	Ciclev10032371m	35.898	1.85244	4.2764	up	0.914279	arogenate dehydrogenase
Leaf	Ciclev10002272m	181.317	38.018	2.25376	up	0.914264
Leaf	Ciclev10031053m	48.7291	5.15249	3.24144	up	0.914196	TCP-1/cpn60 chaperonin family protein
[truncated: 2,025 more rows]
